# Supplementary material
Source: publisher figshare collection journal article supplement (https://brill.figshare.com/articles/dataset/_/26124259)
Supplement: Supplementary file 1 [file 1]

# **Hybridization and introgression in deeply differentiated salamander species – molecular genetics and a reappraisal of Dr. Louis Vallée’s osteological data**

*Jan W. Arntzen* | ORCID: 0000-0003-3229-5993

Institute of Biology, Leiden University, 2333 BE Leiden, The Netherlands

Naturalis Biodiversity Center, 2333 CR Leiden, The Netherlands

*pim.arntzen@gmail.com*

## **Supplementary material**

FIGURE S1 Morphometric data on the osteology of *Triturus cristatus*, *T. marmoratus* and interspecific hybrids from France. The scans are made from the thesis of Dr. Louis Vallée (1959).

TABLEAU 7.

CORRÉLATION HUMÉRO-FÉMORALE — MESURE DE L'HUMÉRUS ET DU FÉMUR.  
Races allopatriques : cas des ♀.

| <i>Marmoratus</i><br>Races Sud |                                 |                               | <i>Cristatus</i><br>Race Paris |                                 |                               | <i>Cristatus</i><br>Races Est |                                 |                               |
|--------------------------------|---------------------------------|-------------------------------|--------------------------------|---------------------------------|-------------------------------|-------------------------------|---------------------------------|-------------------------------|
| N°<br>d'ordre                  | Humérus :<br>longueur<br>en m/m | Fémur :<br>longueur<br>en m/m | N°<br>d'ordre                  | Humérus :<br>longueur<br>en m/m | Fémur :<br>longueur<br>en m/m | N°<br>d'ordre                 | Humérus :<br>longueur<br>en m/m | Fémur :<br>longueur<br>en m/m |
| Corrèze<br>Tulle               |                                 |                               |                                |                                 |                               | Bas-Rhin<br>Strasbourg        |                                 |                               |
| 145                            | 10,6                            | 10                            | 96                             | 11                              | 10                            | 59                            | 11,1                            | 8,9                           |
| 142                            | 10                              | 9,1                           | 97                             | 11                              | 9,2                           | 29                            | 8                               | 6,5                           |
| 146                            | 10                              | 9,1                           | 147                            | 9,1                             | 9                             | 90                            | 11                              | 9,5                           |
| 135                            | 10                              | 9,8                           | 93                             | 11                              | 9                             | 70                            | 9,2                             | 8,9                           |
| 124                            | 10                              | 9,2                           | 100                            | 7,9                             | 7,8                           | 26                            | 7,9                             | 7,2                           |
| 228                            | 9,5                             | 9                             | 98                             | 7,7                             | 6,7                           | 91                            | 8                               | 7,4                           |
| 122                            | 10,8                            | 10,5                          | 99                             | 7,9                             | 7                             | 27                            | 6,8                             | 6                             |
| 372                            | 10,8                            | 10,5                          | 37                             | 7,7                             | 7                             | 14                            | 8                               | 7,3                           |
| 140                            | 9,1                             | 9                             | 87                             | 7,5                             | 6,8                           | 22                            | 7,5                             | 7,4                           |
| 366                            | 9,9                             | 9                             | 86                             | 7,5                             | 6,9                           | 12                            | 8                               | 7,5                           |
| 117                            | 10                              | 9,5                           | 45                             | 8,1                             | 7,3                           | 88                            | 7,6                             | 6,9                           |
| 121                            | 7,7                             | 7,2                           | 85                             | 7,7                             | 6,7                           |                               |                                 |                               |
| 64                             | 10                              | 9,8                           | 41                             | 7                               | 6,5                           |                               |                                 |                               |
| 62                             | 8,1                             | 7,7                           | 32                             | 6,8                             | 6                             |                               |                                 |                               |
| 66                             | 8                               | 7,4                           | 44                             | 6,8                             | 6                             |                               |                                 |                               |
| 55                             | 7,6                             | 6,9                           | 49                             | 7                               | 6,2                           |                               |                                 |                               |
|                                |                                 |                               | 35                             | 6,7                             | 6                             |                               |                                 |                               |
|                                |                                 |                               | 48                             | 6,5                             | 5,7                           |                               |                                 |                               |
|                                |                                 |                               | 43                             | 6                               | 5,2                           |                               |                                 |                               |
|                                |                                 |                               | 1                              | 6                               | 5,4                           |                               |                                 |                               |
| Pyrénées-Orientales<br>Banyuls |                                 |                               |                                |                                 |                               | Meurthe-et-Moselle<br>Nancy   |                                 |                               |
| 340                            | 10,1                            | 9,6                           |                                |                                 |                               | 89                            | 8                               | 7,7                           |
| 361                            | 9,5                             | 9,2                           |                                |                                 |                               | 8                             | 8,2                             | 7,9                           |
| 364                            | 10                              | 9,9                           |                                |                                 |                               | 84                            | 8                               | 7,9                           |
| 72                             | 10,1                            | 9,2                           |                                |                                 |                               | 18                            | 8,5                             | 7,9                           |
| 94                             | 9,7                             | 9                             |                                |                                 |                               | 20                            | 8,2                             | 7                             |
| 56                             | 10                              | 9,1                           |                                |                                 |                               | 83                            | 7,7                             | 7,7                           |
| 11                             | 9,5                             | 9,5                           |                                |                                 |                               | 5                             | 7,8                             | 6,8                           |
| 13                             | 10                              | 9,8                           |                                |                                 |                               | 79                            | 7,7                             | 7                             |
| 19                             | 8,7                             | 8                             |                                |                                 |                               | 77                            | 8,2                             | 7,4                           |
| 74                             | 9,6                             | 9,1                           |                                |                                 |                               | 6                             | 7                               | 6,4                           |
| 42                             | 7,4                             | 6,9                           |                                |                                 |                               | 7                             | 7                               | 6,3                           |
| 73                             | 7,9                             | 8,7                           |                                |                                 |                               |                               |                                 |                               |
| 81                             | 7,3                             | 7,1                           |                                |                                 |                               |                               |                                 |                               |

TABLEAU 8.

CORRÉLATION HUMÉRO-FÉMORALE — MESURE DE L'HUMÉRUS ET DU FÉMUR.  
Races allopatriques : cas des ♂.

| <i>Marmoratus</i><br>Races Sud |                                 |                               | <i>Cristatus</i><br>Race Paris |                                 |                               | <i>Cristatus</i><br>Races Est |                                 |                               |
|--------------------------------|---------------------------------|-------------------------------|--------------------------------|---------------------------------|-------------------------------|-------------------------------|---------------------------------|-------------------------------|
| N°<br>d'ordre                  | Humérus :<br>longueur<br>en m/m | Fémur :<br>longueur<br>en m/m | N°<br>d'ordre                  | Humérus :<br>longueur<br>en m/m | Fémur :<br>longueur<br>en m/m | N°<br>d'ordre                 | Humérus :<br>longueur<br>en m/m | Fémur :<br>longueur<br>en m/m |
| Corrèze<br>Tulle               |                                 |                               |                                |                                 |                               | Bas-Rhin<br>Strasbourg        |                                 |                               |
| 136                            | 9                               | 8,2                           | 141                            | 9,1                             | 8,2                           | 24                            | 7,2                             | 7                             |
| 63                             | 10,1                            | 10,1                          | 95                             | 8                               | 7                             | 15                            | 8,2                             | 7,5                           |
| 58                             | 10,5                            | 9                             | 92                             | 9,7                             | 8                             | 25                            | 8                               | 7,2                           |
| 57                             | 10,5                            | 9,8                           | 3                              | 7,8                             | 6,6                           | 76                            | 8,5                             | 7,8                           |
| 130                            | 8,7                             | 9,5                           | 101                            | 7,9                             | 7,1                           | 16                            | 7,8                             | 7                             |
| 129                            | 8,7                             | 8,1                           | 50                             | 7,5                             | 7,5                           | 30                            | 7                               | 6,4                           |
| 134                            | 7,8                             | 7,6                           | 31                             | 7,2                             | 7                             | 38                            | 9                               | 8,4                           |
| 127                            | 9,1                             | 8,8                           | 4                              | 7,7                             | 6,6                           | 78                            | 8,2                             | 7,5                           |
| 132                            | 8                               | 8,5                           | 102                            | 8                               | 7                             | 28                            | 7,5                             | 6,8                           |
| 126                            | 7,3                             | 7                             | 2                              | 7,6                             | 6,5                           | 21                            | 7                               | 6                             |
|                                |                                 |                               | 46                             | 7                               | 6,3                           |                               |                                 |                               |
|                                |                                 |                               | 36                             | 7,5                             | 6,5                           |                               |                                 |                               |
|                                |                                 |                               | 53                             | 6,6                             | 6,5                           |                               |                                 |                               |
|                                |                                 |                               | 40                             | 6,5                             | 5,7                           |                               |                                 |                               |
|                                |                                 |                               | 47                             | 6,8                             | 6,6                           |                               |                                 |                               |
|                                |                                 |                               | 52                             | 6,1                             | 7                             |                               |                                 |                               |
| Pyrénées-Orientales<br>Banyuls |                                 |                               |                                |                                 |                               | Meurthe-et-Moselle<br>Nancy   |                                 |                               |
| 60                             | 10,4                            | 9,7                           |                                |                                 |                               | 51                            | 8,6                             | 7,4                           |
| 54                             | 10                              | 9                             |                                |                                 |                               | 39                            | 8,5                             | 7,8                           |
| 67                             | 9                               | 8,1                           |                                |                                 |                               | 34                            | 8,5                             | 7                             |
| 68                             | 7,8                             | 7,1                           |                                |                                 |                               | 75                            | 9,1                             | 8                             |
| 71                             | 10                              | 10                            |                                |                                 |                               | 33                            | 8,6                             | 7,6                           |
| 61                             | 9,5                             | 8,8                           |                                |                                 |                               | 80                            | 8,5                             | 7,8                           |
| 363                            | 10,1                            | 8,9                           |                                |                                 |                               | 10                            | 8,2                             | 7,4                           |
| 69                             | 9,8                             | 9,2                           |                                |                                 |                               | 9                             | 9,1                             | 8,4                           |
| 82                             | 8,8                             | 8,1                           |                                |                                 |                               |                               |                                 |                               |
| 65                             | 7,4                             | 7                             |                                |                                 |                               |                               |                                 |                               |

(\*) Les animaux sont classés par tailles décroissantes.



TABEAU 9.

CORRÉLATION HUMÉRO-FÉMORALE — MESURE DE L'HUMÉRUS ET DU FÉMUR.  
Races sympatriques : cas des ♀.

| <i>Marmoratus</i><br>Race Mayenne |                                 |                               | <i>Blasii</i><br>Race Mayenne |                                 |                               | <i>Cristatus</i><br>Race Mayenne |                                 |                               |
|-----------------------------------|---------------------------------|-------------------------------|-------------------------------|---------------------------------|-------------------------------|----------------------------------|---------------------------------|-------------------------------|
| N° d'ordre                        | Humérus :<br>longueur<br>en m/m | Fémur :<br>longueur<br>en m/m | N° d'ordre                    | Humérus :<br>longueur<br>en m/m | Fémur :<br>longueur<br>en m/m | N° d'ordre                       | Humérus :<br>longueur<br>en m/m | Fémur :<br>longueur<br>en m/m |
| 307                               | 10,8                            | 10,2                          | 104                           | 10,2                            | 9,7                           | 265                              | 9                               | 8,2                           |
| 296                               | 11,4                            | 11,1                          | 238                           | 11,2                            | 10,5                          | 326                              | 9                               | 8,5                           |
| 131                               | 10,9                            | 10,3                          | 261                           | 10,6                            | 9,8                           | 184                              | 9                               | 7,8                           |
| 321                               | 10,5                            | 9                             | 219                           | 10,1                            | 10,1                          | 303                              | 8,7                             | 7,5                           |
| 289                               | 10,6                            | 9,1                           | 239                           | 11,1                            | 11                            | 266                              | 9                               | 8                             |
| 179                               | 10,6                            | 10,6                          | 240                           | 10,3                            | 9,4                           | 281                              | 8,9                             | 8                             |
| 332                               | 11                              | 10                            | 237                           | 10                              | 9                             | 286                              | 9,1                             | 8,7                           |
| 272                               | 11,1                            | 9,5                           | 224                           | 10                              | 8,7                           | 298                              | 9,9                             | 8,9                           |
| 236                               | 10,2                            | 9                             | 223                           | 10,1                            | 9,9                           | 302                              | 8,1                             | 6,9                           |
| 214                               | 10                              | 9                             | 106                           | 10,2                            | 9,3                           | 290                              | 8,1                             | 8                             |
| 322                               | 10,9                            | 9,9                           | 253                           | 11                              | 9                             | 359                              | 9,8                             | 9                             |
| 172                               | 9,6                             | 9,3                           | 207                           | 9,5                             | 9,5                           | 154                              | 10,2                            | 8,7                           |
| 345                               | 10,8                            | 9,2                           | 108                           | 9,7                             | 8,9                           | 288                              | 9                               | 8                             |
| 308                               | 11                              | 10                            | 107                           | 10,1                            | 9,9                           | 149                              | 8,7                             | 8,1                           |
| 336                               | 10,9                            | 10                            | 114                           | 9                               | 7,4                           | 165                              | 7,5                             | 7                             |
| 341                               | 9,8                             | 9,7                           | 115                           | 10,1                            | 9,1                           | 358                              | 9,5                             | 8,5                           |
| 328                               | 9,7                             | 9,1                           | 221                           | 10,3                            | 9,8                           | 148                              | 8                               | 6,5                           |
| 137                               | 9,1                             | 8,1                           | 252                           | 10,3                            | 9,3                           | 344                              | 9,4                             | 8,1                           |
| 208                               | 8,7                             | 8,2                           | 262                           | 10                              | 10,1                          | 360                              | 8,7                             | 7,7                           |
| 300                               | 9,6                             | 9                             | 327                           | 9,9                             | 10                            | 230                              | 9                               | 7,5                           |
| 335                               | 9,9                             | 9,1                           | 197                           | 10,9                            | 9,7                           | 283                              | 7,9                             | 6,2                           |
| 151                               | 10,7                            | 9,8                           | 245                           | 10                              | 9,8                           | 294                              | 7,8                             | 6,9                           |
| 175                               | 10,2                            | 9,4                           | 254                           | 10,4                            | 9,9                           | 349                              | 8,1                             | 7                             |
| 123                               | 11,5                            | 10,4                          | 166                           | 9,9                             | 10                            | 185                              | 6,9                             | 6                             |
| 160                               | 9,1                             | 8,1                           | 200                           | 9,1                             | 8,9                           | 186                              | 9,1                             | 8                             |
| 231                               | 10,8                            | 8,7                           | 112                           | 10,1                            | 9                             | 343                              | 7,9                             | 6,9                           |
| 174                               | 8,5                             | 8,4                           | 192                           | 8,2                             | 7,7                           | 297                              | 7,8                             | 7                             |
| 337                               | 10,1                            | 9,2                           | 119                           | 10                              | 8                             | 311                              | 8,1                             | 6,8                           |
| 173                               | 8,5                             | 8,1                           | 199                           | 9,3                             | 9                             | 156                              | 8,7                             | 7,4                           |
| 355                               | 8,7                             | 7,7                           | 243                           | 8                               | 8                             | 167                              | 8,1                             | 7,5                           |
| 189                               | 7,9                             | 7,3                           | 220                           | 8,3                             | 8,2                           | 295                              | 8,1                             | 8                             |
| 212                               | 10,9                            | 9,8                           | 206                           | 8,4                             | 8,2                           | 320                              | 7,8                             | 7,7                           |
| 367                               | 10,4                            | 9,5                           | 256                           | 8,4                             | 7,5                           | 267                              | 8,4                             | 6,6                           |
| 306                               | 9,5                             | 8,7                           | 248                           | 8,4                             | 8,4                           | 168                              | 7,5                             | 7,4                           |
|                                   |                                 |                               | 164                           | 8,9                             | 7,8                           | 263                              | 8,3                             | 7,4                           |
|                                   |                                 |                               | 255                           | 9                               | 7,2                           | 365                              | 7,6                             | 7                             |
|                                   |                                 |                               | 196                           | 9,1                             | 8,7                           | 202                              | 8                               | 6,3                           |
|                                   |                                 |                               | 198                           | 9,4                             | 8,2                           | 269                              | 7                               | 6                             |
|                                   |                                 |                               | 273                           | 9                               | 8                             | 312                              | 9                               | 9,3                           |
|                                   |                                 |                               | 113                           | 7,9                             | 7,9                           | 305                              | 8,1                             | 7,9                           |
|                                   |                                 |                               | 259                           | 7,3                             | 7,3                           | 152                              | 8,1                             | 7,9                           |
|                                   |                                 |                               | 225                           | 7,3                             | 7,8                           | 133                              | 7,9                             | 7,3                           |
|                                   |                                 |                               | 241                           | 8,5                             | 7,4                           | 187                              | 6,7                             | 5                             |
|                                   |                                 |                               |                               |                                 |                               | 217                              | 8,9                             | 8,1                           |
|                                   |                                 |                               |                               |                                 |                               | 150                              | 6,9                             | 6,9                           |
|                                   |                                 |                               |                               |                                 |                               | 153                              | 7,5                             | 5,8                           |

TABEAU 10.

CORRÉLATION HUMÉRO-FÉMORALE — MESURE DE L'HUMÉRUS ET DU FÉMUR.  
Races sympatriques : cas des ♂.

| <i>Marmoratus</i><br>Race Mayenne |                                 |                               | <i>Blasii</i><br>Race Mayenne |                                 |                               | <i>Cristatus</i><br>Race Mayenne |                                 |                               |
|-----------------------------------|---------------------------------|-------------------------------|-------------------------------|---------------------------------|-------------------------------|----------------------------------|---------------------------------|-------------------------------|
| N° d'ordre                        | Humérus :<br>longueur<br>en m/m | Fémur :<br>longueur<br>en m/m | N° d'ordre                    | Humérus :<br>longueur<br>en m/m | Fémur :<br>longueur<br>en m/m | N° d'ordre                       | Humérus :<br>longueur<br>en m/m | Fémur :<br>longueur<br>en m/m |
| 213                               | 10,8                            | 9,6                           | 246                           | 10,1                            | 9,9                           | 291                              | 9,9                             | 8,9                           |
| 292                               | 9                               | 8,4                           | 138                           | 10,5                            | 10                            | 210                              | 8,1                             | 7,2                           |
| 171                               | 9,3                             | 8,7                           | 242                           | 10                              | 9,1                           | 211                              | 9,4                             | 8,4                           |
| 232                               | 8,1                             | 7,5                           | 144                           | 11,1                            | 10                            | 215                              | 9,2                             | 8,2                           |
| 193                               | 10,1                            | 9                             | 125                           | 9,5                             | 9                             | 310                              | 10                              | 8,6                           |
| 257                               | 9,9                             | 9,3                           | 244                           | 10                              | 8,8                           | 128                              | 8,1                             | 7,3                           |
| 299                               | 9,6                             | 9,1                           | 103                           | 11                              | 9,7                           | 180                              | 8,1                             | 8                             |
| 143                               | 8,1                             | 7,8                           | 250                           | 8,5                             | 8                             | 362                              | 8,6                             | 8,4                           |
| 271                               | 11,4                            | 10,4                          | 260                           | 9                               | 7,8                           | 158                              | 8,1                             | 7                             |
| 234                               | 8,4                             | 7,5                           | 251                           | 9,6                             | 8,3                           | 309                              | 10                              | 8,5                           |
| 324                               | 9,9                             | 9,9                           | 247                           | 9,3                             | 8,4                           | 176                              | 9,4                             | 8,1                           |
| 181                               | 8,6                             | 8,3                           | 258                           | 10                              | 8                             | 351                              | 9,1                             | 8                             |
| 182                               | 9,6                             | 9,4                           | 331                           | 10,1                            | 10                            | 233                              | 8,4                             | 7,2                           |
| 352                               | 9                               | 8,3                           | 163                           | 10                              | 8,1                           | 350                              | 9,4                             | 8,5                           |
| 339                               | 10,8                            | 9,8                           | 334                           | 9,9                             | 8,7                           | 301                              | 8,1                             | 8,9                           |
| 191                               | 9,6                             | 9                             | 249                           | 8,4                             | 6,8                           | 357                              | 8,2                             | 7,5                           |
| 159                               | 9,3                             | 9,1                           | 109                           | 8,9                             | 8,2                           | 157                              | 8,5                             | 7,1                           |
| 209                               | 7,4                             | 7,3                           | 194                           | 8,4                             | 8,1                           | 177                              | 9,3                             | 8,6                           |
| 116                               | 7,5                             | 6,8                           | 139                           | 8,5                             | 7,5                           | 280                              | 9,4                             | 8,6                           |
| 323                               | 8,8                             | 8,7                           | 226                           | 7,8                             | 7,4                           | 235                              | 8,1                             | 7,3                           |
| 342                               | 8,9                             | 8,3                           | 105                           | 8,4                             | 7,3                           | 161                              | 8,1                             | 7,1                           |
| 346                               | 8,4                             | 7,8                           | 222                           | 6,3                             | 6                             | 169                              | 9,2                             | 8,5                           |
| 120                               | 7,9                             | 7,8                           |                               |                                 |                               | 162                              | 8,1                             | 8                             |
| 347                               | 8                               | 8                             |                               |                                 |                               | 325                              | 7,8                             | 7                             |
| 229                               | 8                               | 7,2                           |                               |                                 |                               | 319                              | 7,3                             | 7,3                           |
| 338                               | 7,9                             | 7,6                           |                               |                                 |                               | 354                              | 7,5                             | 6,5                           |
| 118                               | 8,4                             | 6,7                           |                               |                                 |                               | 205                              | 8,6                             | 7,5                           |
| 188                               | 7,8                             | 7,5                           |                               |                                 |                               | 203                              | 7,7                             | 7,1                           |
| 329                               | 6,6                             | 6                             |                               |                                 |                               | 333                              | 8,1                             | 8,1                           |
| 17                                | 9,5                             | 8                             |                               |                                 |                               | 170                              | 7,9                             | 7,5                           |
|                                   |                                 |                               |                               |                                 |                               | 183                              | 7,9                             | 7,5                           |
|                                   |                                 |                               |                               |                                 |                               | 264                              | 8,5                             | 7,1                           |
|                                   |                                 |                               |                               |                                 |                               | 348                              | 8,1                             | 7                             |
|                                   |                                 |                               |                               |                                 |                               | 178                              | 7,7                             | 6,1                           |
|                                   |                                 |                               |                               |                                 |                               | 356                              | 8,1                             | 6,8                           |
|                                   |                                 |                               |                               |                                 |                               | 304                              | 7                               | 7                             |
|                                   |                                 |                               |                               |                                 |                               | 282                              | 7,4                             | 6,4                           |
|                                   |                                 |                               |                               |                                 |                               | 201                              | 7,6                             | 7,1                           |
|                                   |                                 |                               |                               |                                 |                               | 284                              | 7,5                             | 6,6                           |
|                                   |                                 |                               |                               |                                 |                               | 353                              | 7,8                             | 6,5                           |
|                                   |                                 |                               |                               |                                 |                               | 330                              | 7,8                             | 6,3                           |



TABEAU 11.

CORRÉLATION HUMÉRO-FÉMORALE — RAPPORT DE LA LONGUEUR DE L'HUMÉRUS  
A LA LONGUEUR DU FÉMUR H/F.  
Races allopatriques.

| Femelles                                         |      |                                                  |      |                                                 |      | Mâles                                            |      |                                                  |      |                                                 |      |
|--------------------------------------------------|------|--------------------------------------------------|------|-------------------------------------------------|------|--------------------------------------------------|------|--------------------------------------------------|------|-------------------------------------------------|------|
| <i>Marmoratus</i><br>Races Sud<br>Moyenne : 4,05 |      | <i>Cristatus</i><br>Race Paris<br>Moyenne : 4,44 |      | <i>Cristatus</i><br>Races Est<br>Moyenne : 4,09 |      | <i>Marmoratus</i><br>Races Sud<br>Moyenne : 4,05 |      | <i>Cristatus</i><br>Race Paris<br>Moyenne : 4,09 |      | <i>Cristatus</i><br>Races Est<br>Moyenne : 4,40 |      |
| N°<br>d'ordre                                    | H/F  | N°<br>d'ordre                                    | H/F  | N°<br>d'ordre                                   | H/F  | N°<br>d'ordre                                    | H/F  | N°<br>d'ordre                                    | H/F  | N°<br>d'ordre                                   | H/F  |
| Corrèze<br>Tulle                                 |      |                                                  |      | Bas-Rhin<br>Strasbourg                          |      | Corrèze<br>Tulle                                 |      |                                                  |      | Bas-Rhin<br>Strasbourg                          |      |
| 145                                              | 1,06 | 96                                               | 1,10 | 59                                              | 1,24 | 136                                              | 1,10 | 141                                              | 1,10 | 24                                              | 1,02 |
| 142                                              | 1,10 | 97                                               | 1,19 | 29                                              | 1,23 | 63                                               | 1    | 95                                               | 1,14 | 15                                              | 1,09 |
| 146                                              | 1,10 | 147                                              | 1,01 | 90                                              | 1,15 | 58                                               | 1,16 | 92                                               | 1,21 | 25                                              | 1,11 |
| 135                                              | 1,02 | 93                                               | 1,22 | 70                                              | 1,03 | 57                                               | 1,07 | 3                                                | 1,18 | 76                                              | 1,09 |
| 124                                              | 1,08 | 100                                              | 1,01 | 26                                              | 1,09 | 130                                              | 0,91 | 101                                              | 1,11 | 16                                              | 1,11 |
| 228                                              | 1,05 | 98                                               | 1,15 | 91                                              | 1,08 | 129                                              | 1,08 | 50                                               | 1    | 30                                              | 1,09 |
| 122                                              | 1,02 | 99                                               | 1,13 | 27                                              | 1,13 | 134                                              | 1,02 | 31                                               | 1,03 | 38                                              | 1,07 |
| 372                                              | 1,02 | 37                                               | 1,10 | 14                                              | 1,09 | 127                                              | 1,03 | 4                                                | 1,16 | 78                                              | 1,09 |
| 140                                              | 1,01 | 87                                               | 1,10 | 22                                              | 1,01 | 132                                              | 0,94 | 102                                              | 1,14 | 28                                              | 1,10 |
| 366                                              | 1,10 | 86                                               | 1,08 | 12                                              | 1,06 | 126                                              | 1,04 | 2                                                | 1,16 | 21                                              | 1,16 |
| 117                                              | 1,05 | 45                                               | 1,11 | 88                                              | 1,10 |                                                  |      | 46                                               | 1,11 |                                                 |      |
| 121                                              | 1,07 | 85                                               | 1,15 |                                                 |      |                                                  |      | 36                                               | 1,15 |                                                 |      |
| 64                                               | 1,02 | 41                                               | 1,07 |                                                 |      |                                                  |      | 53                                               | 1,01 |                                                 |      |
| 62                                               | 1,05 | 32                                               | 1,13 |                                                 |      |                                                  |      | 40                                               | 1,14 |                                                 |      |
| 66                                               | 1,08 | 44                                               | 1,13 |                                                 |      |                                                  |      | 47                                               | 1,03 |                                                 |      |
| 55                                               | 1,10 | 49                                               | 1,13 |                                                 |      |                                                  |      | 52                                               | 0,87 |                                                 |      |
|                                                  |      | 35                                               | 1,11 |                                                 |      |                                                  |      |                                                  |      |                                                 |      |
|                                                  |      | 48                                               | 1,14 |                                                 |      |                                                  |      |                                                  |      |                                                 |      |
|                                                  |      | 43                                               | 1,15 |                                                 |      |                                                  |      |                                                  |      |                                                 |      |
|                                                  |      | 1                                                | 1,11 |                                                 |      |                                                  |      |                                                  |      |                                                 |      |
| Pyrénées-<br>Orientales<br>Banyuls               |      |                                                  |      | Meurthe-<br>et-Moselle<br>Nancy                 |      | Pyrénées-<br>Orientales<br>Banyuls               |      |                                                  |      | Meurthe-<br>et-Moselle<br>Nancy                 |      |
| 340                                              | 1,05 |                                                  |      | 89                                              | 1,03 | 60                                               | 1,07 | 51                                               | 1,16 |                                                 |      |
| 361                                              | 1,03 |                                                  |      | 8                                               | 1,03 | 54                                               | 1,11 | 39                                               | 1,09 |                                                 |      |
| 364                                              | 1,01 |                                                  |      | 84                                              | 1,01 | 67                                               | 1,11 | 34                                               | 1,21 |                                                 |      |
| 72                                               | 1,10 |                                                  |      | 18                                              | 1,07 | 68                                               | 1,10 | 75                                               | 1,14 |                                                 |      |
| 94                                               | 1,08 |                                                  |      | 20                                              | 1,17 | 71                                               | 1    | 33                                               | 1,13 |                                                 |      |
| 56                                               | 1,10 |                                                  |      | 83                                              | 1    | 61                                               | 1,08 | 80                                               | 1,09 |                                                 |      |
| 11                                               | 1    |                                                  |      | 5                                               | 1,14 | 363                                              | 1,13 | 10                                               | 1,10 |                                                 |      |
| 13                                               | 1,02 |                                                  |      | 79                                              | 1,10 | 69                                               | 1,06 | 9                                                | 1,08 |                                                 |      |
| 19                                               | 1,09 |                                                  |      | 77                                              | 1,10 | 82                                               | 1,08 |                                                  |      |                                                 |      |
| 74                                               | 1,05 |                                                  |      | 6                                               | 1,09 | 65                                               | 1,05 |                                                  |      |                                                 |      |
| 42                                               | 1,07 |                                                  |      | 7                                               | 1,11 |                                                  |      |                                                  |      |                                                 |      |
| 73                                               | 0,90 |                                                  |      |                                                 |      |                                                  |      |                                                  |      |                                                 |      |
| 81                                               | 1,02 |                                                  |      |                                                 |      |                                                  |      |                                                  |      |                                                 |      |

TABEAU 12.

CORRÉLATION HUMÉRO-FÉMORALE — RAPPORT DE LA LONGUEUR DE L'HUMÉRUS  
A LA LONGUEUR DU FÉMUR H/F.  
Races sympatriques.

| Femelles                                               |      |                                                    |      |                                                       |      | Mâles                                                  |      |                                                    |      |                                                       |      |
|--------------------------------------------------------|------|----------------------------------------------------|------|-------------------------------------------------------|------|--------------------------------------------------------|------|----------------------------------------------------|------|-------------------------------------------------------|------|
| <i>Marmoratus</i><br>Race<br>Mayenne<br>Moyenne : 4,09 |      | <i>Blasii</i><br>Race<br>Mayenne<br>Moyenne : 4,07 |      | <i>Cristatus</i><br>Race<br>Mayenne<br>Moyenne : 4,42 |      | <i>Marmoratus</i><br>Race<br>Mayenne<br>Moyenne : 4,07 |      | <i>Blasii</i><br>Race<br>Mayenne<br>Moyenne : 4,40 |      | <i>Cristatus</i><br>Race<br>Mayenne<br>Moyenne : 4,41 |      |
| N°<br>d'ordre                                          | H/F  | N°<br>d'ordre                                      | H/F  | N°<br>d'ordre                                         | H/F  | N°<br>d'ordre                                          | H/F  | N°<br>d'ordre                                      | H/F  | N°<br>d'ordre                                         | H/F  |
| 307                                                    | 1,05 | 104                                                | 1,05 | 265                                                   | 1,10 | 213                                                    | 1,12 | 246                                                | 1,02 | 291                                                   | 1,11 |
| 296                                                    | 1,02 | 238                                                | 1,06 | 326                                                   | 1,05 | 292                                                    | 1,07 | 138                                                | 1,05 | 210                                                   | 1,12 |
| 131                                                    | 1,05 | 261                                                | 1,08 | 184                                                   | 1,15 | 171                                                    | 1,06 | 242                                                | 1,10 | 211                                                   | 1,11 |
| 321                                                    | 1,16 | 219                                                | 1    | 303                                                   | 1,16 | 232                                                    | 1,08 | 144                                                | 1,11 | 215                                                   | 1,12 |
| 289                                                    | 1,16 | 239                                                | 1,01 | 266                                                   | 1,12 | 193                                                    | 1,12 | 125                                                | 1,05 | 310                                                   | 1,16 |
| 179                                                    | 1    | 240                                                | 1,09 | 281                                                   | 1,11 | 257                                                    | 1,06 | 244                                                | 1,13 | 128                                                   | 1,10 |
| 332                                                    | 1,10 | 237                                                | 1,11 | 286                                                   | 1,04 | 299                                                    | 1,05 | 103                                                | 1,13 | 180                                                   | 1,01 |
| 272                                                    | 1,16 | 224                                                | 1,15 | 298                                                   | 1,11 | 143                                                    | 1,03 | 250                                                | 1,06 | 362                                                   | 1,02 |
| 236                                                    | 1,13 | 223                                                | 1,02 | 302                                                   | 1,17 | 271                                                    | 1,09 | 260                                                | 1,15 | 158                                                   | 1,15 |
| 214                                                    | 1,11 | 106                                                | 1,09 | 290                                                   | 1,01 | 234                                                    | 1,12 | 251                                                | 1,15 | 309                                                   | 1,17 |
| 322                                                    | 1,10 | 253                                                | 1,22 | 359                                                   | 1,08 | 324                                                    | 1    | 247                                                | 1,10 | 176                                                   | 1,16 |
| 172                                                    | 1,03 | 207                                                | 1    | 154                                                   | 1,17 | 181                                                    | 1,03 | 258                                                | 1,25 | 351                                                   | 1,13 |
| 345                                                    | 1,17 | 108                                                | 1,08 | 288                                                   | 1,12 | 182                                                    | 1,02 | 331                                                | 1,01 | 233                                                   | 1,16 |
| 308                                                    | 1,10 | 107                                                | 1,02 | 149                                                   | 1,07 | 352                                                    | 1,08 | 163                                                | 1,23 | 350                                                   | 1,15 |
| 336                                                    | 1,09 | 114                                                | 1,21 | 165                                                   | 1,07 | 339                                                    | 1,10 | 334                                                | 1,13 | 301                                                   | 0,91 |
| 341                                                    | 1,01 | 115                                                | 1,11 | 358                                                   | 1,11 | 191                                                    | 1,06 | 249                                                | 1,23 | 357                                                   | 1,09 |
| 328                                                    | 1,06 | 221                                                | 1,05 | 148                                                   | 1,23 | 159                                                    | 1,02 | 109                                                | 1,08 | 157                                                   | 1,19 |
| 137                                                    | 1,12 | 252                                                | 1,10 | 344                                                   | 1,16 | 209                                                    | 1,01 | 194                                                | 1,03 | 177                                                   | 1,08 |
| 208                                                    | 1,06 | 262                                                | 0,99 | 360                                                   | 1,13 | 116                                                    | 1,10 | 139                                                | 1,13 | 280                                                   | 1,09 |
| 300                                                    | 1,06 | 327                                                | 0,99 | 230                                                   | 1,20 | 323                                                    | 1,01 | 226                                                | 1,05 | 235                                                   | 1,10 |
| 335                                                    | 1,08 | 197                                                | 1,12 | 283                                                   | 1,27 | 342                                                    | 1,07 | 105                                                | 1,15 | 161                                                   | 1,14 |
| 151                                                    | 1,09 | 245                                                | 1,02 | 294                                                   | 1,13 | 346                                                    | 1,07 | 222                                                | 1,05 | 169                                                   | 1,08 |
| 175                                                    | 1,08 | 254                                                | 1,05 | 349                                                   | 1,16 | 120                                                    | 1,01 |                                                    |      | 162                                                   | 1,01 |
| 123                                                    | 1,10 | 166                                                | 0,99 | 185                                                   | 1,15 | 347                                                    | 1    |                                                    |      | 325                                                   | 1,11 |
| 160                                                    | 1,12 | 200                                                | 1,02 | 186                                                   | 1,13 | 229                                                    | 1,11 |                                                    |      | 319                                                   | 1    |
| 231                                                    | 1,24 | 112                                                | 1,12 | 343                                                   | 1,14 | 338                                                    | 1,04 |                                                    |      | 354                                                   | 1,15 |
| 174                                                    | 1,01 | 192                                                | 1,06 | 297                                                   | 1,11 | 118                                                    | 1,25 |                                                    |      | 205                                                   | 1,14 |
| 337                                                    | 1,10 | 119                                                | 1,25 | 311                                                   | 1,19 | 188                                                    | 1,04 |                                                    |      | 203                                                   | 1,08 |
| 173                                                    | 1,05 | 199                                                | 1,03 | 156                                                   | 1,17 | 329                                                    | 1,10 |                                                    |      | 333                                                   | 1    |
| 355                                                    | 1,13 | 243                                                | 1    | 167                                                   | 1,08 | 17                                                     | 1,18 |                                                    |      | 170                                                   | 1,05 |
| 189                                                    | 1,08 | 220                                                | 1,01 | 295                                                   | 1,01 |                                                        |      |                                                    |      | 183                                                   | 1,05 |
| 212                                                    | 1,11 | 206                                                | 1,02 | 320                                                   | 1,01 |                                                        |      |                                                    |      | 264                                                   | 1,19 |
| 367                                                    | 1,09 | 256                                                | 1,12 | 267                                                   | 1,27 |                                                        |      |                                                    |      | 348                                                   | 1,15 |
| 306                                                    | 1,09 | 248                                                | 1    | 168                                                   | 1,01 |                                                        |      |                                                    |      | 178                                                   | 1,26 |
|                                                        |      | 164                                                | 1,14 | 263                                                   | 1,12 |                                                        |      |                                                    |      | 356                                                   | 1,19 |
|                                                        |      | 255                                                | 1,25 | 365                                                   | 1,08 |                                                        |      |                                                    |      | 304                                                   | 1    |
|                                                        |      | 196                                                | 1,04 | 202                                                   | 1,27 |                                                        |      |                                                    |      | 282                                                   | 1,15 |
|                                                        |      | 198                                                | 1,14 | 269                                                   | 1,16 |                                                        |      |                                                    |      | 201                                                   | 1,07 |
|                                                        |      | 273                                                | 1,12 | 312                                                   | 0,96 |                                                        |      |                                                    |      | 284                                                   | 1,13 |
|                                                        |      | 113                                                | 1    | 305                                                   | 1,02 |                                                        |      |                                                    |      | 353                                                   | 1,20 |
|                                                        |      | 259                                                | 1    | 152                                                   | 1,02 |                                                        |      |                                                    |      | 330                                                   | 1,23 |
|                                                        |      | 225                                                | 0,93 | 133                                                   | 1,08 |                                                        |      |                                                    |      |                                                       |      |
|                                                        |      | 241                                                | 1,14 | 187                                                   | 1,34 |                                                        |      |                                                    |      |                                                       |      |
|                                                        |      |                                                    |      | 217                                                   | 1,10 |                                                        |      |                                                    |      |                                                       |      |
|                                                        |      |                                                    |      | 150                                                   | 1    |                                                        |      |                                                    |      |                                                       |      |
|                                                        |      |                                                    |      | 153                                                   | 1,29 |                                                        |      |                                                    |      |                                                       |      |



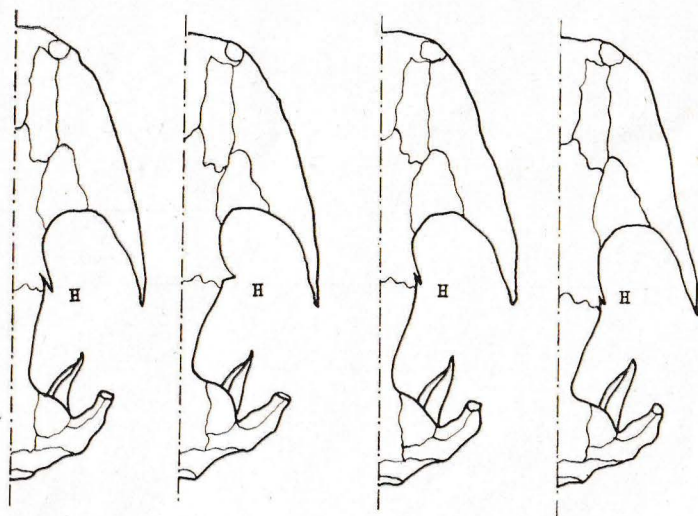

FIG. 16. — Ostéologie du crâne.  
Variations de l'apophyse du frontal (H), chez *blasii*.

c'est-à-dire dans la région *marmoratus* et 14 % dans la région *cristatus* à gauche de cette verticale.

Afin d'exploiter plus à fond cette corrélation, nous avons établi les rapports des longueurs DC aux largeurs GH. Ces rapports  $\frac{DC}{GH}$  sont consignés dans les tableaux 18, 19, d'où nous avons extrait le tableau 20 et l'histogramme (fig. 20).

Toutes les moyennes varient sensiblement d'une espèce à l'autre (Tableau 20) mais encore d'une race à l'autre. On note également quelques différences selon le sexe, mais les nombres qui les représentent sont en général trop faibles pour que leur ensemble soit significatif. Les écart-types restent petits chez les races allopatriques pour devenir plus importants chez les races sympatriques, surtout chez *cristatus* où ils dépassent même les valeurs trouvées chez *blasii*. Les intervalles de sécurité déterminés grâce aux erreurs standard comme il a été précisé plus haut indiquent une séparation entre *marmoratus* et *cristatus* et situent *blasii* tout près de *marmoratus*.

L'histogramme (fig. 20) confirme ces observations, il suffit, pour le constater, de considérer les traits mixtes placés à l'abscisse moyenne de chaque groupe représentatif. Il fait en outre apparaître une forte hétérogénéité parmi *cristatus* ; le plus grand étalement est relatif à *cristatus*, race Mayenne, puis, par valeurs décroissantes à *blasii*, à *cristatus*, race Paris et Est, à *marmoratus* race Mayenne, enfin à *marmoratus* race Sud.

TABLEAU 14.

OSTÉOLOGIE DU CRÂNE.  
LOGARITHME DE LA LONGUEUR TOTALE DC  
ET LOGARITHME DE LA LARGEUR AU NIVEAU DE L'APOPHYSE FRONTALE GH.  
Races allopatriques : cas des ♀.

| <i>Marmoratus</i><br>Races Sud |         |         | <i>Cristatus</i><br>Race Paris |         |         | <i>Cristatus</i><br>Races Est |         |         |
|--------------------------------|---------|---------|--------------------------------|---------|---------|-------------------------------|---------|---------|
| N° d'ordre                     | log. DC | log. GH | N° d'ordre                     | log. DC | log. GH | N° d'ordre                    | log. DC | log. GH |
| Corrèze<br>Tulle               |         |         |                                |         |         | Bas-Rhin<br>Strasbourg        |         |         |
| 145                            | 1,1903  | 0,8095  | 96                             | 1,1731  | 0,6989  | 59                            | 1,1430  | 0,6580  |
| 142                            | 1461    | 7283    | 97                             | 1461    | 6721    | 29                            | 0881    | 5378    |
| 146                            | 1538    | 7558    | 147                            | 1522    | 6902    | 90                            | 1367    | 6483    |
| 135                            | 1583    | 7923    | 93                             | 1398    | 6483    | 70                            | 1020    | 6483    |
| 124                            | 1303    | 7781    | 100                            | 1020    | 6283    | 26                            | 0791    | 6074    |
| 228                            | 1205    | 7481    | 98                             | 1072    | 6627    | 91                            | 0791    | 6074    |
| 122                            | 1492    | 7403    | 99                             | 0791    | 6483    | 27                            | 0293    | 4983    |
| 372                            | 1430    | 7364    | 37                             | 0492    | 6180    | 14                            | 0827    | 5910    |
| 140                            | 1105    | 7201    | 87                             | 0530    | 6580    | 22                            | 0374    | 5966    |
| 366                            | 1303    | 7403    | 86                             | 0530    | 6483    | 12                            | 0718    | 5966    |
| 117                            | 1492    | 7781    | 45                             | 0791    | 6334    | 88                            | 0334    | 5051    |
| 121                            | 0827    | 7201    | 85                             | 0530    | 6483    |                               |         |         |
| 64                             | 1430    | 7403    | 41                             | 0293    | 6020    |                               |         |         |
| 62                             | 1238    | 6989    | 32                             | 0170    | 5682    |                               |         |         |
| 66                             | 1205    | 7118    | 44                             | 0043    | 5502    |                               |         |         |
| 55                             | 0827    | 6902    | 49                             | 0374    | 6483    |                               |         |         |
|                                |         |         | 35                             | 0211    | 6020    |                               |         |         |
|                                |         |         | 48                             | 0607    | 6020    |                               |         |         |
|                                |         |         | 43                             | 0253    | 5966    |                               |         |         |
|                                |         |         | 1                              | 0,9030  | 4624    |                               |         |         |
| Pyrénées-Orientales<br>Banyuls |         |         |                                |         |         | Meurthe-et-Moselle<br>Nancy   |         |         |
| 340                            | 1,1398  | 0,7481  |                                |         |         | 89                            | 1,0718  | 0,5966  |
| 361                            | 1303    | 7323    |                                |         |         | 8                             | 0607    | 6020    |
| 364                            | 1476    | 7671    |                                |         |         | 84                            | 0644    | 5966    |
| 72                             | 1861    | 7708    |                                |         |         | 18                            | 1072    | 6674    |
| 94                             | 1553    | 7923    |                                |         |         | 20                            | 0791    | 6532    |
| 56                             | 1205    | 7558    |                                |         |         | 83                            | 0453    | 5966    |
| 11                             | 1303    | 6989    |                                |         |         | 5                             | 0453    | 5563    |
| 13                             | 1205    | 7403    |                                |         |         | 79                            | 0791    | 6180    |
| 19                             | 1105    | 7364    |                                |         |         | 77                            | 0791    | 6232    |
| 74                             | 1238    | 6989    |                                |         |         | 6                             | 0,9030  | 4548    |
| 42                             | 1105    | 6946    |                                |         |         | 7                             | 1,0607  | 5378    |
| 73                             | 1205    | 6989    |                                |         |         |                               |         |         |
| 81                             | 1003    | 7323    |                                |         |         |                               |         |         |



TABLEAU 15.

OSTÉOLOGIE DU CRÂNE.

LOGARITHME DE LA LONGUEUR TOTALE DC

ET LOGARITHME DE LA LARGEUR AU NIVEAU DE L'APOPHYSE FRONTALE GH.

Races allopatriques : cas des ♂.

| Marmoratus<br>Races Sud          |         |         | Cristatus<br>Race Paris |         |         | Cristatus<br>Races Est      |         |         |
|----------------------------------|---------|---------|-------------------------|---------|---------|-----------------------------|---------|---------|
| N°<br>d'ordre                    | log. DC | log. GH | N°<br>d'ordre           | log. DC | log. GH | N°<br>d'ordre               | log. DC | log. GH |
| Corrèze<br>Tulle                 |         |         |                         |         |         | Bas-Rhin<br>Strasbourg      |         |         |
| 136                              | 1,1760  | 0,7817  | 141                     | 1,1398  | 0,6532  | 24                          | 1,0791  | 0,4983  |
| 63                               | 1398    | 6989    | 95                      | 1105    | 6434    | 15                          | 0827    | 5966    |
| 58                               | 1760    | 7853    | 92                      | 0934    | 6532    | 25                          | 0827    | 5910    |
| 57                               | 1492    | 7323    | 3                       | 0791    | 6384    | 76                          | 0881    | 5966    |
| 130                              | 1303    | 6857    | 101                     | 0863    | 5910    | 16                          | 0827    | 6074    |
| 129                              | 1139    | 6902    | 50                      | 1020    | 6580    | 30                          | 0827    | 6074    |
| 134                              | 1003    | 7403    | 31                      | 0413    | 6020    | 38                          | 1105    | 6483    |
| 127                              | 1303    | 6627    | 4                       | 0644    | 6020    | 78                          | 0845    | 6020    |
| 132                              | 1461    | 6989    | 102                     | 0530    | 6127    | 28                          | 0644    | 6020    |
| 126                              | 0755    | 7708    | 2                       | 0492    | 6020    | 21                          | 0453    | 5378    |
|                                  |         |         | 46                      | 0211    | 5682    |                             |         |         |
|                                  |         |         | 36                      | 0413    | 6020    |                             |         |         |
|                                  |         |         | 53                      | 0314    | 5378    |                             |         |         |
|                                  |         |         | 40                      | 0021    | 5440    |                             |         |         |
|                                  |         |         | 47                      | 0607    | 6074    |                             |         |         |
|                                  |         |         | 52                      | 0211    | 5622    |                             |         |         |
| Pyrénées - Orientales<br>Banyuls |         |         |                         |         |         | Meurthe-et-Moselle<br>Nancy |         |         |
| 60                               | 1,1818  | 0,7781  |                         |         |         | 51                          | 1,0718  | 0,6483  |
| 54                               | 1205    | 7403    |                         |         |         | 39                          | 0607    | 6483    |
| 67                               | 1139    | 7596    |                         |         |         | 34                          | 0791    | 5966    |
| 68                               | 0791    | 7323    |                         |         |         | 75                          | 0530    | 6074    |
| 71                               | 1903    | 8129    |                         |         |         | 33                          | 0791    | 5910    |
| 61                               | 1303    | 7323    |                         |         |         | 80                          | 0969    | 5966    |
| 363                              | 1760    | 7403    |                         |         |         | 10                          | 0453    | 5682    |
| 69                               | 1461    | 7075    |                         |         |         | 9                           | 0492    | 6074    |
| 82                               | 1072    | 7323    |                         |         |         |                             |         |         |
| 65                               | 0969    | 7558    |                         |         |         |                             |         |         |

TABLEAU 16.

OSTÉOLOGIE DU CRÂNE.

LOGARITHME DE LA LONGUEUR TOTALE DC

ET LOGARITHME DE LA LARGEUR AU NIVEAU DE L'APOPHYSE FRONTALE GH.

Races sympatriques : cas des ♀.

| Marmoratus<br>Race Mayenne |         |         | Blasii<br>Race Mayenne |         |         | Cristatus<br>Race Mayenne |         |         |
|----------------------------|---------|---------|------------------------|---------|---------|---------------------------|---------|---------|
| N°<br>d'ordre              | log. DC | log. GH | N°<br>d'ordre          | log. DC | log. GH | N°<br>d'ordre             | log. DC | log. GH |
| 307                        | 1,2479  | 0,8976  | 104                    | 1,2014  | 0,7745  | 265                       | 1,1492  | 0,6232  |
| 296                        | 2304    | 7558    | 238                    | 2148    | 7708    | 326                       | 1335    | 6074    |
| 131                        | 1846    | 8260    | 261                    | 2068    | 7888    | 184                       | 1303    | 6232    |
| 321                        | 1760    | 8260    | 219                    | 2174    | 7745    | 303                       | 1398    | 6434    |
| 289                        | 1731    | 7745    | 239                    | 2304    | 7817    | 266                       | 0863    | 6989    |
| 179                        | 2068    | 8061    | 240                    | 1931    | 7993    | 281                       | 1105    | 6434    |
| 332                        | 2014    | 8061    | 237                    | 1702    | 7481    | 286                       | 1702    | 5502    |
| 272                        | 1398    | 7118    | 224                    | 1673    | 7201    | 298                       | 1731    | 6902    |
| 236                        | 1367    | 7283    | 223                    | 1673    | 7118    | 302                       | 0791    | 6020    |
| 214                        | 1553    | 8129    | 106                    | 1717    | 7242    | 290                       | 0718    | 6902    |
| 322                        | 1875    | 8027    | 253                    | 1717    | 7201    | 359                       | 1303    | 6580    |
| 172                        | 1522    | 7364    | 207                    | 1430    | 6902    | 154                       | 2304    | 6989    |
| 345                        | 1673    | 7442    | 108                    | 1522    | 6812    | 288                       | 1702    | 6627    |
| 308                        | 1398    | 7781    | 107                    | 1789    | 6946    | 149                       | 1105    | 6180    |
| 336                        | 1959    | 7323    | 114                    | 1105    | 6283    | 165                       | 1003    | 5502    |
| 341                        | 1731    | 7403    | 115                    | 1789    | 6812    | 358                       | 1139    | 6483    |
| 328                        | 2068    | 7708    | 221                    | 1522    | 7708    | 148                       | 0934    | 5966    |
| 137                        | 1613    | 7958    | 252                    | 1903    | 7708    | 344                       | 1461    | 5440    |
| 208                        | 1205    | 7442    | 262                    | 1303    | 7853    | 360                       | 1367    | 6434    |
| 300                        | 1613    | 6857    | 327                    | 2095    | 7781    | 230                       | 0863    | 6020    |
| 335                        | 2014    | 8356    | 197                    | 2095    | 7708    | 283                       | 0791    | 6074    |
| 151                        | 1398    | 7993    | 245                    | 1702    | 7075    | 294                       | 1271    | 5118    |
| 175                        | 1613    | 6989    | 254                    | 1643    | 7160    | 349                       | 0791    | 5682    |
| 123                        | 1818    | 8061    | 166                    | 1492    | 7745    | 185                       | 0791    | 5910    |
| 160                        | 1731    | 7323    | 200                    | 1303    | 7596    | 186                       | 1139    | 6127    |
| 231                        | 2253    | 7403    | 112                    | 1335    | 7364    | 343                       | 1105    | 6180    |
| 174                        | 1553    | 8095    | 192                    | 0934    | 6946    | 297                       | 0607    | 5502    |
| 337                        | 2121    | 7781    | 119                    | 1398    | 7481    | 311                       | 1172    | 6020    |
| 173                        | 1398    | 6989    | 199                    | 1303    | 7708    | 156                       | 1931    | 5682    |
| 355                        | 1731    | 7634    | 243                    | 1303    | 6989    | 167                       | 1139    | 6232    |
| 189                        | 0827    | 6989    | 220                    | 1020    | 7032    | 295                       | 1238    | 6127    |
| 212                        | 1613    | 7781    | 206                    | 1172    | 6902    | 320                       | 0969    | 5966    |
| 367                        | 1673    | 7596    | 256                    | 1222    | 7364    | 267                       | 1398    | 5682    |
| 306                        | 1553    | 7442    | 248                    | 0827    | 7118    | 168                       | 0969    | 7481    |
|                            |         |         | 164                    | 1492    | 7993    | 263                       | 1139    | 6020    |
|                            |         |         | 255                    | 1553    | 6483    | 365                       | 0934    | 6074    |
|                            |         |         | 196                    | 1122    | 6989    | 202                       | 0934    | 6627    |
|                            |         |         | 198                    | 1172    | 6989    | 269                       | 0413    | 6946    |
|                            |         |         | 273                    | 1122    | 6857    | 312                       | 0881    | 5682    |
|                            |         |         | 113                    | 0827    | 7323    | 305                       | 1038    | 6434    |
|                            |         |         | 259                    | 1122    | 6946    | 152                       | 1271    | 6020    |
|                            |         |         | 225                    | 0934    | 7160    | 133                       | 1335    | 5966    |
|                            |         |         | 241                    | 0827    | 7032    | 187                       | 0,9420  | 5740    |
|                            |         |         |                        |         |         | 217                       | 1,0969  | 5966    |
|                            |         |         |                        |         |         | 150                       | 1038    | 6127    |
|                            |         |         |                        |         |         | 153                       | 0791    | 5910    |



TABEAU 17.

OSTÉOLOGIE DU CRÂNE.

LOGARITHME DE LA LONGUEUR TOTALE DC

ET LOGARITHME DE LA LARGEUR AU NIVEAU DE L'APOPHYSE FRONTALE GH.

Races sympatriques : cas des ♂.

| <i>Marmoratus</i><br>Race Mayenne |         |         | <i>Blasii</i><br>Race Mayenne |         |         | <i>Cristatus</i><br>Race Mayenne |         |         |
|-----------------------------------|---------|---------|-------------------------------|---------|---------|----------------------------------|---------|---------|
| N° d'ordre                        | log. DC | log. GH | N° d'ordre                    | log. DC | log. GH | N° d'ordre                       | log. DC | log. GH |
| 213                               | 1,1789  | 0,7403  | 246                           | 1,1789  | 0,6721  | 291                              | 1,1238  | 0,6902  |
| 292                               | 1430    | 6483    | 138                           | 1492    | 6483    | 210                              | 1105    | 6434    |
| 171                               | 1205    | 6989    | 242                           | 1702    | 7708    | 211                              | 1303    | 6483    |
| 232                               | 0934    | 7993    | 144                           | 1303    | 7403    | 215                              | 1139    | 6074    |
| 193                               | 1303    | 6946    | 125                           | 1492    | 7481    | 310                              | 1303    | 5502    |
| 257                               | 1731    | 8325    | 244                           | 1789    | 7032    | 128                              | 0791    | 5682    |
| 299                               | 1613    | 7745    | 103                           | 1430    | 6020    | 180                              | 1271    | 6127    |
| 143                               | 1072    | 6902    | 250                           | 0755    | 6721    | 362                              | 1038    | 6180    |
| 271                               | 1430    | 7323    | 260                           | 1303    | 7118    | 158                              | 1205    | 6384    |
| 234                               | 0934    | 6283    | 251                           | 1335    | 6483    | 309                              | 1367    | 6532    |
| 324                               | 1613    | 7242    | 247                           | 1702    | 7923    | 176                              | 0791    | 6483    |
| 181                               | 1038    | 6627    | 258                           | 1613    | 7481    | 351                              | 1139    | 6180    |
| 182                               | 1731    | 7118    | 331                           | 1238    | 7403    | 233                              | 1003    | 5797    |
| 352                               | 0934    | 6483    | 163                           | 1020    | 7708    | 350                              | 1172    | 6232    |
| 339                               | 1731    | 7032    | 334                           | 1367    | 6946    | 301                              | 0755    | 6902    |
| 191                               | 0899    | 7403    | 249                           | 0969    | 7160    | 357                              | 0899    | 5682    |
| 159                               | 1105    | 7403    | 109                           | 0755    | 6127    | 157                              | 1139    | 6020    |
| 209                               | 0969    | 6334    | 194                           | 1172    | 6946    | 177                              | 1205    | 5622    |
| 116                               | 1398    | 7160    | 139                           | 0413    | 6627    | 280                              | 1038    | 5910    |
| 323                               | 1553    | 7708    | 226                           | 0413    | 6483    | 235                              | 1038    | 6434    |
| 342                               | 1553    | 6857    | 105                           | 0791    | 7118    | 161                              | 0881    | 5563    |
| 346                               | 1303    | 6902    | 222                           | 0,9956  | 6627    | 169                              | 1003    | 6283    |
| 120                               | 1398    | 6812    |                               |         |         | 162                              | 0934    | 5966    |
| 347                               | 1492    | 7323    |                               |         |         | 325                              | 0791    | 5563    |
| 229                               | 0934    | 6989    |                               |         |         | 319                              | 0413    | 6127    |
| 338                               | 1072    | 6989    |                               |         |         | 354                              | 0791    | 4983    |
| 118                               | 0530    | 6989    |                               |         |         | 205                              | 1303    | 5378    |
| 188                               | 0718    | 6283    |                               |         |         | 203                              | 0863    | 5966    |
| 329                               | 0863    | 6946    |                               |         |         | 333                              | 1072    | 6020    |
| 17                                | 1020    | 6946    |                               |         |         | 170                              | 0899    | 6180    |
|                                   |         |         |                               |         |         | 183                              | 0791    | 5502    |
|                                   |         |         |                               |         |         | 264                              | 1072    | 6232    |
|                                   |         |         |                               |         |         | 348                              | 1105    | 5622    |
|                                   |         |         |                               |         |         | 178                              | 0530    | 5502    |
|                                   |         |         |                               |         |         | 356                              | 1105    | 5682    |
|                                   |         |         |                               |         |         | 304                              | 0607    | 6384    |
|                                   |         |         |                               |         |         | 282                              | 0791    | 5118    |
|                                   |         |         |                               |         |         | 201                              | 0625    | 4983    |
|                                   |         |         |                               |         |         | 284                              | 0413    | 5378    |
|                                   |         |         |                               |         |         | 353                              | 0,9493  | 5051    |
|                                   |         |         |                               |         |         | 330                              | 0,9030  | 4983    |

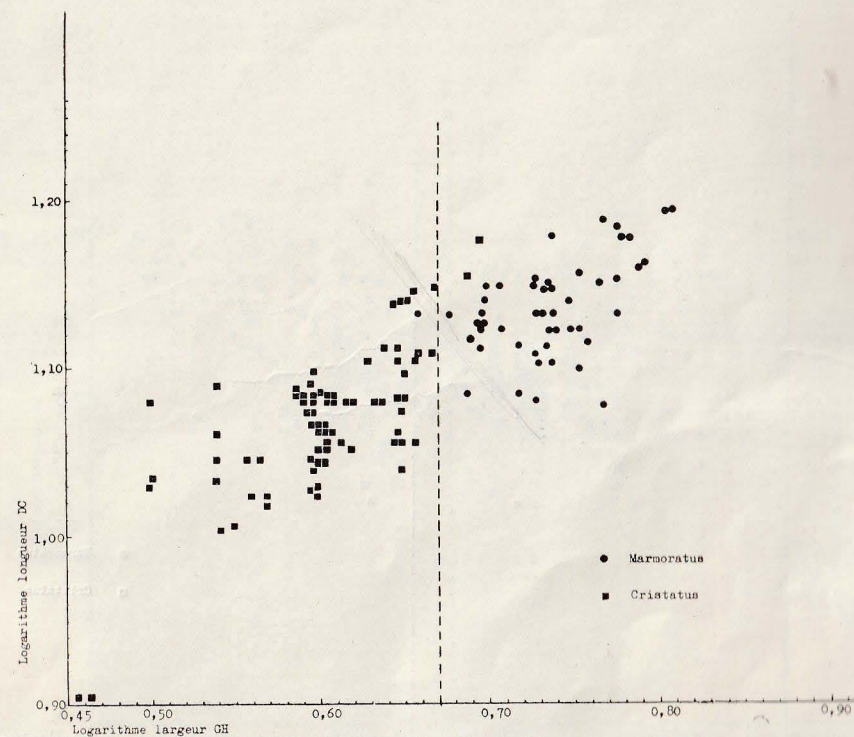

Fig. 17. — Ostéologie du crâne. Représentation graphique des mesures DC et GH.  
Races allopatriques.



TABLEAU 18.

OSTÉOLOGIE DU CRÂNE.  
RAPPORT DE LA LONGUEUR TOTALE DC A LA LARGEUR  
MESURÉE AU NIVEAU DE L'APOPHYSE FRONTALE GH  
Races allopatriques.

| Femelles                                         |       |                                                  |       |                                              |       | Mâles                                           |       |                                                  |       |                                              |       |
|--------------------------------------------------|-------|--------------------------------------------------|-------|----------------------------------------------|-------|-------------------------------------------------|-------|--------------------------------------------------|-------|----------------------------------------------|-------|
| <i>Marmoratus</i><br>Races Sud<br>Moyenne : 2,46 |       | <i>Cristatus</i><br>Race Paris<br>Moyenne : 2,75 |       | <i>Cristatus</i><br>Races Est<br>Moyenne : 3 |       | <i>Marmoratus</i><br>Races Sud<br>Moyenne : 2,5 |       | <i>Cristatus</i><br>Race Paris<br>Moyenne : 2,86 |       | <i>Cristatus</i><br>Races Est<br>Moyenne : 3 |       |
| N°<br>d'ordre                                    | DC/GH | N°<br>d'ordre                                    | DC/GH | N°<br>d'ordre                                | DC/GH | N°<br>d'ordre                                   | DC/GH | N°<br>d'ordre                                    | DC/GH | N°<br>d'ordre                                | DC/GH |
| Corrèze<br>Tulle                                 |       |                                                  |       | Bas-Rhin<br>Strasbourg                       |       | Corrèze<br>Tulle                                |       |                                                  |       | Bas-Rhin<br>Strasbourg                       |       |
| 145                                              | 2,40  | 96                                               | 2,98  | 59                                           | 3,05  | 136                                             | 2,47  | 141                                              | 3,06  | 24                                           | 3,80  |
| 142                                              | 2,61  | 97                                               | 2,97  | 29                                           | 3,55  | 63                                              | 2,76  | 95                                               | 2,93  | 15                                           | 3,06  |
| 146                                              | 2,50  | 147                                              | 2,89  | 90                                           | 3,07  | 58                                              | 2,45  | 92                                               | 2,75  | 25                                           | 3,10  |
| 135                                              | 2,32  | 93                                               | 3,10  | 70                                           | 2,84  | 57                                              | 2,61  | 3                                                | 2,76  | 76                                           | 3,10  |
| 124                                              | 2,25  | 100                                              | 2,97  | 26                                           | 2,96  | 130                                             | 2,78  | 101                                              | 3,13  | 16                                           | 2,98  |
| 228                                              | 2,35  | 98                                               | 2,78  | 91                                           | 2,96  | 129                                             | 2,65  | 50                                               | 2,78  | 30                                           | 2,98  |
| 122                                              | 2,56  | 99                                               | 2,69  | 27                                           | 3,39  | 134                                             | 2,29  | 31                                               | 2,75  | 38                                           | 2,89  |
| 372                                              | 2,55  | 37                                               | 2,69  | 14                                           | 3,10  | 127                                             | 2,93  | 4                                                | 2,90  | 78                                           | 3,03  |
| 140                                              | 2,45  | 87                                               | 2,48  | 22                                           | 2,75  | 132                                             | 2,80  | 102                                              | 2,75  | 28                                           | 2,90  |
| 366                                              | 2,45  | 86                                               | 2,53  | 12                                           | 2,98  | 126                                             | 2,01  | 2                                                | 2,80  | 21                                           | 3,21  |
| 117                                              | 2,35  | 45                                               | 2,79  | 88                                           | 3,37  |                                                 |       | 46                                               | 2,83  |                                              |       |
| 121                                              | 2,30  | 85                                               | 2,53  |                                              |       |                                                 |       | 36                                               | 2,75  |                                              |       |
| 64                                               | 2,52  | 41                                               | 2,67  |                                              |       |                                                 |       | 53                                               | 3,11  |                                              |       |
| 62                                               | 2,66  | 32                                               | 2,81  |                                              |       |                                                 |       | 40                                               | 2,87  |                                              |       |
| 66                                               | 2,56  | 44                                               | 2,84  |                                              |       |                                                 |       | 47                                               | 2,84  |                                              |       |
| 55                                               | 2,47  | 49                                               | 2,44  |                                              |       |                                                 |       | 52                                               | 2,87  |                                              |       |
|                                                  |       | 35                                               | 2,62  |                                              |       |                                                 |       |                                                  |       |                                              |       |
|                                                  |       | 48                                               | 2,87  |                                              |       |                                                 |       |                                                  |       |                                              |       |
|                                                  |       | 43                                               | 2,68  |                                              |       |                                                 |       |                                                  |       |                                              |       |
|                                                  |       | 1                                                | 2,75  |                                              |       |                                                 |       |                                                  |       |                                              |       |
| Pyrénées-<br>Orientales<br>Banyuls               |       |                                                  |       | Meurthe-<br>et-Moselle<br>Nancy              |       | Pyrénées-<br>Orientales<br>Banyuls              |       |                                                  |       | Meurthe-<br>et-Moselle<br>Nancy              |       |
| 340                                              | 2,46  |                                                  |       | 89                                           | 2,98  | 60                                              | 2,53  |                                                  |       | 51                                           | 2,65  |
| 361                                              | 2,50  |                                                  |       | 8                                            | 2,87  | 54                                              | 2,40  |                                                  |       | 39                                           | 2,58  |
| 364                                              | 2,40  |                                                  |       | 84                                           | 2,93  | 67                                              | 2,26  |                                                  |       | 34                                           | 3,03  |
| 72                                               | 2,60  |                                                  |       | 18                                           | 2,75  | 68                                              | 2,22  |                                                  |       | 75                                           | 2,79  |
| 94                                               | 2,30  |                                                  |       | 20                                           | 2,66  | 71                                              | 2,38  |                                                  |       | 33                                           | 3,07  |
| 56                                               | 2,31  |                                                  |       | 83                                           | 2,81  | 61                                              | 2,50  |                                                  |       | 80                                           | 3,16  |
| 11                                               | 2,70  |                                                  |       | 5                                            | 3,08  | 363                                             | 2,72  |                                                  |       | 10                                           | 3     |
| 13                                               | 2,40  |                                                  |       | 79                                           | 2,89  | 69                                              | 2,74  |                                                  |       | 9                                            | 2,76  |
| 19                                               | 2,36  |                                                  |       | 77                                           | 2,85  | 82                                              | 2,37  |                                                  |       |                                              |       |
| 74                                               | 2,66  |                                                  |       | 6                                            | 2,80  | 65                                              | 2,19  |                                                  |       |                                              |       |
| 42                                               | 2,60  |                                                  |       | 7                                            | 3,33  |                                                 |       |                                                  |       |                                              |       |
| 73                                               | 2,64  |                                                  |       |                                              |       |                                                 |       |                                                  |       |                                              |       |
| 81                                               | 2,33  |                                                  |       |                                              |       |                                                 |       |                                                  |       |                                              |       |

TABLEAU 19.

OSTÉOLOGIE DU CRÂNE.  
RAPPORT DE LA LONGUEUR TOTALE DC A LA LARGEUR  
MESURÉE AU NIVEAU DE L'APOPHYSE FRONTALE GH  
Races sympatriques.

| Femelles                                               |       |                                                    |       |                                                       |       | Mâles                                                  |       |                                                    |       |                                                       |       |
|--------------------------------------------------------|-------|----------------------------------------------------|-------|-------------------------------------------------------|-------|--------------------------------------------------------|-------|----------------------------------------------------|-------|-------------------------------------------------------|-------|
| <i>Marmoratus</i><br>Race<br>Mayenne<br>Moyenne : 2,54 |       | <i>Blasii</i><br>Race<br>Mayenne<br>Moyenne : 2,63 |       | <i>Cristatus</i><br>Race<br>Mayenne<br>Moyenne : 3,45 |       | <i>Marmoratus</i><br>Race<br>Mayenne<br>Moyenne : 2,62 |       | <i>Blasii</i><br>Race<br>Mayenne<br>Moyenne : 2,62 |       | <i>Cristatus</i><br>Race<br>Mayenne<br>Moyenne : 3,46 |       |
| N°<br>d'ordre                                          | DC/GH | N°<br>d'ordre                                      | DC/GH | N°<br>d'ordre                                         | DC/GH | N°<br>d'ordre                                          | DC/GH | N°<br>d'ordre                                      | DC/GH | N°<br>d'ordre                                         | DC/GH |
| 307                                                    | 2,24  | 104                                                | 2,67  | 265                                                   | 3,35  | 213                                                    | 2,74  | 246                                                | 3,21  | 291                                                   | 2,71  |
| 296                                                    | 2,98  | 238                                                | 2,77  | 326                                                   | 3,35  | 292                                                    | 3,12  | 138                                                | 3,16  | 210                                                   | 2,93  |
| 131                                                    | 2,28  | 261                                                | 2,61  | 184                                                   | 3,21  | 171                                                    | 2,64  | 242                                                | 2,50  | 211                                                   | 3,03  |
| 321                                                    | 2,23  | 219                                                | 2,77  | 303                                                   | 3,13  | 232                                                    | 1,96  | 144                                                | 2,45  | 215                                                   | 3,21  |
| 289                                                    | 2,50  | 239                                                | 2,80  | 266                                                   | 2,44  | 193                                                    | 2,72  | 125                                                | 2,51  | 310                                                   | 3,80  |
| 179                                                    | 2,51  | 240                                                | 2,47  | 281                                                   | 2,93  | 257                                                    | 2,19  | 244                                                | 2,99  | 128                                                   | 3,24  |
| 332                                                    | 2,48  | 237                                                | 2,64  | 286                                                   | 4,16  | 299                                                    | 2,43  | 103                                                | 3,47  | 180                                                   | 3,26  |
| 272                                                    | 2,67  | 224                                                | 2,80  | 298                                                   | 3,04  | 143                                                    | 2,61  | 250                                                | 2,53  | 362                                                   | 3,06  |
| 236                                                    | 2,56  | 223                                                | 2,85  | 302                                                   | 3     | 271                                                    | 2,57  | 260                                                | 2,62  | 158                                                   | 3,03  |
| 214                                                    | 2,20  | 106                                                | 2,80  | 290                                                   | 2,40  | 234                                                    | 2,90  | 251                                                | 3,05  | 309                                                   | 3,04  |
| 322                                                    | 2,42  | 253                                                | 2,82  | 359                                                   | 2,96  | 324                                                    | 2,73  | 247                                                | 2,38  | 176                                                   | 2,69  |
| 172                                                    | 2,60  | 207                                                | 2,83  | 154                                                   | 3,40  | 181                                                    | 2,76  | 258                                                | 2,59  | 351                                                   | 3,13  |
| 345                                                    | 2,64  | 108                                                | 2,95  | 288                                                   | 3,21  | 182                                                    | 2,89  | 331                                                | 2,41  | 233                                                   | 3,31  |
| 308                                                    | 2,30  | 107                                                | 3,05  | 149                                                   | 3,10  | 352                                                    | 2,78  | 163                                                | 2,14  | 350                                                   | 3,11  |
| 336                                                    | 2,90  | 114                                                | 3,03  | 165                                                   | 3,54  | 339                                                    | 2,95  | 334                                                | 2,76  | 301                                                   | 2,42  |
| 341                                                    | 2,70  | 115                                                | 3,14  | 358                                                   | 2,92  | 191                                                    | 2,23  | 249                                                | 2,40  | 357                                                   | 3,32  |
| 328                                                    | 2,72  | 221                                                | 2,40  | 148                                                   | 3,13  | 159                                                    | 2,34  | 109                                                | 2,90  | 157                                                   | 3,25  |
| 137                                                    | 2,32  | 252                                                | 2,62  | 344                                                   | 4     | 209                                                    | 2,90  | 194                                                | 2,64  | 177                                                   | 3,61  |
| 208                                                    | 2,37  | 262                                                | 2,21  | 360                                                   | 3,11  | 116                                                    | 2,65  | 139                                                | 2,39  | 280                                                   | 3,25  |
| 300                                                    | 2,98  | 327                                                | 2,70  | 230                                                   | 3,05  | 323                                                    | 2,42  | 226                                                | 2,47  | 235                                                   | 2,88  |
| 335                                                    | 2,32  | 197                                                | 2,74  | 283                                                   | 2,96  | 342                                                    | 2,94  | 105                                                | 2,33  | 161                                                   | 3,40  |
| 151                                                    | 2,19  | 245                                                | 2,90  | 294                                                   | 4,12  | 346                                                    | 2,75  | 222                                                | 2,15  | 169                                                   | 2,96  |
| 175                                                    | 2,90  | 254                                                | 2,80  | 349                                                   | 3,24  | 120                                                    | 2,87  |                                                    |       | 162                                                   | 3,13  |
| 123                                                    | 2,37  | 166                                                | 2,37  | 185                                                   | 3,07  | 347                                                    | 2,61  |                                                    |       | 325                                                   | 3,33  |
| 160                                                    | 2,75  | 200                                                | 2,34  | 186                                                   | 3,17  | 229                                                    | 2,48  |                                                    |       | 319                                                   | 2,68  |
| 231                                                    | 3,05  | 112                                                | 2,49  | 343                                                   | 3,10  | 338                                                    | 2,56  |                                                    |       | 354                                                   | 3,80  |
| 174                                                    | 2,21  | 192                                                | 2,50  | 297                                                   | 3,23  | 118                                                    | 2,26  |                                                    |       | 205                                                   | 3,91  |
| 337                                                    | 2,71  | 119                                                | 2,46  | 311                                                   | 3,27  | 188                                                    | 2,77  |                                                    |       | 203                                                   | 3,08  |
| 173                                                    | 2,76  | 199                                                | 2,28  | 156                                                   | 4,21  | 329                                                    | 2,46  |                                                    |       | 333                                                   | 3,20  |
| 355                                                    | 2,56  | 243                                                | 2,70  | 167                                                   | 3,09  | 17                                                     | 2,55  |                                                    |       | 170                                                   | 2,96  |
| 189                                                    | 2,42  | 220                                                | 2,50  | 295                                                   | 3,24  |                                                        |       |                                                    |       | 183                                                   | 3,38  |
| 212                                                    | 2,41  | 206                                                | 2,67  | 320                                                   | 3,16  |                                                        |       |                                                    |       | 264                                                   | 3,04  |
| 367                                                    | 2,55  | 256                                                | 2,43  | 267                                                   | 3,73  |                                                        |       |                                                    |       | 348                                                   | 3,53  |
| 306                                                    | 2,57  | 248                                                | 2,34  | 168                                                   | 2,23  |                                                        |       |                                                    |       | 178                                                   | 3,18  |
|                                                        |       | 164                                                | 2,23  | 263                                                   | 3,25  |                                                        |       |                                                    |       | 356                                                   | 3,48  |
|                                                        |       | 255                                                | 3,21  | 365                                                   | 3,06  |                                                        |       |                                                    |       | 304                                                   | 2,64  |
|                                                        |       | 196                                                | 2,59  | 202                                                   | 2,69  |                                                        |       |                                                    |       | 282                                                   | 3,69  |
|                                                        |       | 198                                                | 2,62  | 269                                                   | 2,22  |                                                        |       |                                                    |       | 201                                                   | 3,66  |
|                                                        |       | 273                                                | 2,67  | 312                                                   | 3,31  |                                                        |       |                                                    |       | 284                                                   | 3,18  |
|                                                        |       | 113                                                | 2,24  | 305                                                   | 2,88  |                                                        |       |                                                    |       | 353                                                   | 2,78  |
|                                                        |       | 259                                                | 2,61  | 152                                                   | 3,35  |                                                        |       |                                                    |       | 330                                                   | 2,58  |
|                                                        |       | 225                                                | 2,38  | 133                                                   | 3,44  |                                                        |       |                                                    |       |                                                       |       |
|                                                        |       | 241                                                | 2,39  | 187                                                   | 2,33  |                                                        |       |                                                    |       |                                                       |       |
|                                                        |       |                                                    |       | 217                                                   | 3,16  |                                                        |       |                                                    |       |                                                       |       |
|                                                        |       |                                                    |       | 150                                                   | 3,10  |                                                        |       |                                                    |       |                                                       |       |
|                                                        |       |                                                    |       | 153                                                   | 3,07  |                                                        |       |                                                    |       |                                                       |       |



TABEAU 21.

OSTÉOLOGIE DE L'APPAREIL HYO-BRANCHIAL  
CERATO-BRANCHIAL.  
RAPPORT DE LA LARGEUR DE L'EXTRÉMITÉ SUPÉRIEURE KL  
A LA LARGEUR DE L'EXTRÉMITÉ INFÉRIEURE MN.  
Races allopatriques.

| Femelles                                         |       |                                                  |       |                                                 |       | Mâles                                            |       |                                                  |       |                                                 |       |
|--------------------------------------------------|-------|--------------------------------------------------|-------|-------------------------------------------------|-------|--------------------------------------------------|-------|--------------------------------------------------|-------|-------------------------------------------------|-------|
| <i>Marmoratus</i><br>Races Sud<br>Moyenne : 2,87 |       | <i>Cristatus</i><br>Race Paris<br>Moyenne : 4,94 |       | <i>Cristatus</i><br>Races Est<br>Moyenne : 4,95 |       | <i>Marmoratus</i><br>Races Sud<br>Moyenne : 2,87 |       | <i>Cristatus</i><br>Race Paris<br>Moyenne : 4,96 |       | <i>Cristatus</i><br>Races Est<br>Moyenne : 4,94 |       |
| N°<br>d'ordre                                    | KL/MN | N°<br>d'ordre                                    | KL/MN | N°<br>d'ordre                                   | KL/MN | N°<br>d'ordre                                    | KL/MN | N°<br>d'ordre                                    | KL/MN | N°<br>d'ordre                                   | KL/MN |
| Corrèze<br>Tulle                                 |       |                                                  |       | Bas-Rhin<br>Strasbourg                          |       | Corrèze<br>Tulle                                 |       |                                                  |       | Bas-Rhin<br>Strasbourg                          |       |
| 145                                              | 3,30  | 96                                               | 1,90  | 59                                              | 2     | 136                                              | 2,86  | 141                                              | 2,20  | 24                                              | 1,81  |
| 142                                              | 3,04  | 97                                               | 1,81  | 29                                              | 1,95  | 63                                               | 3     | 95                                               | 2,22  | 15                                              | 1,88  |
| 146                                              | 3,20  | 147                                              | 1,80  | 90                                              | 2,20  | 58                                               | 2,72  | 92                                               | 1,90  | 25                                              | 2     |
| 135                                              | 2,51  | 93                                               | 2,33  | 70                                              | 2     | 57                                               | 3,20  | 3                                                | 1,81  | 76                                              | 1,89  |
| 124                                              | 2,86  | 100                                              | 1,89  | 26                                              | 2,06  | 130                                              | 2,70  | 101                                              | 2,22  | 16                                              | 1,84  |
| 228                                              | 2,65  | 98                                               | 2,25  | 91                                              | 1,77  | 129                                              | 3     | 50                                               | 1,85  | 30                                              | 2,10  |
| 122                                              | 2,80  | 99                                               | 1,72  | 27                                              | 1,87  | 134                                              | 2,90  | 31                                               | 2     | 38                                              | 1,95  |
| 372                                              | 2,84  | 37                                               | 1,95  | 14                                              | 2,07  | 127                                              | 2,90  | 4                                                | 1,81  | 78                                              | 2     |
| 140                                              | 2,72  | 87                                               | 1,81  | 22                                              | 1,88  | 132                                              | 2,70  | 102                                              | 1,96  | 28                                              | 1,84  |
| 366                                              | 2,80  | 86                                               | 1,80  | 12                                              | 1,81  | 126                                              | 2,80  | 2                                                | 1,90  | 21                                              | 2     |
| 117                                              | 3     | 45                                               | 2,10  | 88                                              | 1,88  |                                                  |       | 46                                               | 1,95  |                                                 |       |
| 121                                              | 2,81  | 85                                               | 1,85  |                                                 |       |                                                  |       | 36                                               | 1,88  |                                                 |       |
| 64                                               | 2,70  | 41                                               | 1,83  |                                                 |       |                                                  |       | 53                                               | 2,10  |                                                 |       |
| 62                                               | 2,77  | 32                                               | 1,95  |                                                 |       |                                                  |       | 40                                               | 1,70  |                                                 |       |
| 66                                               | 2,86  | 44                                               | 2     |                                                 |       |                                                  |       | 47                                               | 1,80  |                                                 |       |
| 55                                               | 2,76  | 49                                               | 2,10  |                                                 |       |                                                  |       | 52                                               | 2,16  |                                                 |       |
|                                                  |       | 35                                               | 2,15  |                                                 |       |                                                  |       |                                                  |       |                                                 |       |
|                                                  |       | 48                                               | 1,78  |                                                 |       |                                                  |       |                                                  |       |                                                 |       |
|                                                  |       | 43                                               | 1,90  |                                                 |       |                                                  |       |                                                  |       |                                                 |       |
|                                                  |       | 1                                                | 2     |                                                 |       |                                                  |       |                                                  |       |                                                 |       |
| Pyrénées-<br>Orientales<br>Banyuls               |       |                                                  |       | Meurthe-<br>et-Moselle<br>Nancy                 |       | Pyrénées-<br>Orientales<br>Banyuls               |       |                                                  |       | Meurthe-<br>et-Moselle<br>Nancy                 |       |
| 340                                              | 2,95  |                                                  |       | 89                                              | 1,80  | 60                                               | 2,95  | 51                                               | 1,80  |                                                 |       |
| 361                                              | 2,94  |                                                  |       | 8                                               | 1,88  | 54                                               | 3,10  | 39                                               | 2,10  |                                                 |       |
| 364                                              | 2,90  |                                                  |       | 84                                              | 2     | 67                                               | 2,92  | 34                                               | 2     |                                                 |       |
| 72                                               | 3     |                                                  |       | 18                                              | 1,80  | 68                                               | 2,90  | 75                                               | 1,90  |                                                 |       |
| 94                                               | 2,85  |                                                  |       | 20                                              | 1,90  | 71                                               | 2,66  | 33                                               | 2     |                                                 |       |
| 56                                               | 3     |                                                  |       | 83                                              | 2,10  | 61                                               | 3     | 80                                               | 2     |                                                 |       |
| 11                                               | 2,82  |                                                  |       | 5                                               | 2,25  | 363                                              | 2,66  | 10                                               | 1,92  |                                                 |       |
| 13                                               | 2,82  |                                                  |       | 79                                              | 2     | 69                                               | 2,90  | 9                                                | 2     |                                                 |       |
| 19                                               | 3     |                                                  |       | 77                                              | 1,77  | 82                                               | 2,90  |                                                  |       |                                                 |       |
| 74                                               | 3,02  |                                                  |       | 6                                               | 2     | 65                                               | 2,80  |                                                  |       |                                                 |       |
| 42                                               | 2,86  |                                                  |       | 7                                               | 2     |                                                  |       |                                                  |       |                                                 |       |
| 73                                               | 2,85  |                                                  |       |                                                 |       |                                                  |       |                                                  |       |                                                 |       |
| 81                                               | 2,70  |                                                  |       |                                                 |       |                                                  |       |                                                  |       |                                                 |       |

TABEAU 22.

OSTÉOLOGIE DE L'APPAREIL HYO-BRANCHIAL, CERATO-BRANCHIAL.  
RAPPORT DE LA LARGEUR DE L'EXTRÉMITÉ SUPÉRIEURE KL  
A LA LARGEUR DE L'EXTRÉMITÉ INFÉRIEURE MN.  
Races sympatriques.

| Femelles                                               |       |                                                    |       |                                                       |       | Mâles                                                  |       |                                                    |       |                                                    |       |
|--------------------------------------------------------|-------|----------------------------------------------------|-------|-------------------------------------------------------|-------|--------------------------------------------------------|-------|----------------------------------------------------|-------|----------------------------------------------------|-------|
| <i>Marmoratus</i><br>Race<br>Mayenne<br>Moyenne : 2,87 |       | <i>Blasii</i><br>Race<br>Mayenne<br>Moyenne : 2,42 |       | <i>Cristatus</i><br>Race<br>Mayenne<br>Moyenne : 4,98 |       | <i>Marmoratus</i><br>Race<br>Mayenne<br>Moyenne : 2,75 |       | <i>Blasii</i><br>Race<br>Mayenne<br>Moyenne : 2,53 |       | <i>Cristatus</i><br>Race<br>Mayenne<br>Moyenne : 2 |       |
| N°<br>d'ordre                                          | KL/MN | N°<br>d'ordre                                      | KL/MN | N°<br>d'ordre                                         | KL/MN | N°<br>d'ordre                                          | KL/MN | N°<br>d'ordre                                      | KL/MN | N°<br>d'ordre                                      | KL/MN |
| 307                                                    | 3,11  | 104                                                | 2,11  | 265                                                   | 2,07  | 213                                                    | 3     | 246                                                | 3     | 291                                                | 1,47  |
| 296                                                    | 3,30  | 238                                                | 2,55  | 326                                                   | 1,18  | 292                                                    | 2,45  | 138                                                | 2,30  | 210                                                | 2     |
| 131                                                    | 2,35  | 261                                                | 1,28  | 184                                                   | 2,07  | 171                                                    | 3     | 242                                                | 2     | 211                                                | 2,08  |
| 321                                                    | 3     | 219                                                | 3,50  | 303                                                   | 2,08  | 232                                                    | 1,55  | 144                                                | 1,94  | 215                                                | 2     |
| 289                                                    | 2,85  | 239                                                | 3,20  | 266                                                   | 1,86  | 193                                                    | 3     | 125                                                | 2     | 310                                                | 2,18  |
| 179                                                    | 3,15  | 240                                                | 2,50  | 281                                                   | 1,33  | 257                                                    | 3,74  | 244                                                | 2,34  | 128                                                | 2     |
| 332                                                    | 2,83  | 237                                                | 2,14  | 286                                                   | 2,36  | 299                                                    | 2,60  | 103                                                | 2,32  | 180                                                | 1,93  |
| 272                                                    | 3     | 224                                                | 2,70  | 298                                                   | 1,98  | 143                                                    | 2,86  | 250                                                | 2,08  | 362                                                | 1,56  |
| 236                                                    | 2,71  | 223                                                | 2,50  | 302                                                   | 1,93  | 271                                                    | 3     | 260                                                | 3,45  | 158                                                | 2     |
| 214                                                    | 2,70  | 106                                                | 3     | 290                                                   | 1,64  | 234                                                    | 2,45  | 251                                                | 3,25  | 309                                                | 2,25  |
| 322                                                    | 3     | 253                                                | 2,86  | 359                                                   | 2,28  | 324                                                    | 3     | 247                                                | 2,60  | 176                                                | 1,88  |
| 172                                                    | 3,10  | 207                                                | 2,10  | 154                                                   | 1,80  | 181                                                    | 2,80  | 258                                                | 2,85  | 351                                                | 2     |
| 345                                                    | 2,77  | 108                                                | 4     | 288                                                   | 2,11  | 182                                                    | 3,30  | 331                                                | 3     | 233                                                | 1,87  |
| 308                                                    | 2,70  | 107                                                | 2,34  | 149                                                   | 1,57  | 352                                                    | 2,40  | 163                                                | 2,25  | 350                                                | 2     |
| 336                                                    | 3     | 114                                                | 2,00  | 165                                                   | 2,12  | 339                                                    | 2,92  | 334                                                | 2,72  | 301                                                | 2     |
| 341                                                    | 2,70  | 115                                                | 1,91  | 358                                                   | 2,13  | 191                                                    | 2,20  | 249                                                | 3,64  | 357                                                | 1,69  |
| 328                                                    | 2,72  | 221                                                | 2,40  | 148                                                   | 2,42  | 159                                                    | 2,76  | 109                                                | 2,55  | 157                                                | 2,22  |
| 137                                                    | 2,77  | 252                                                | 2,29  | 344                                                   | 2     | 209                                                    | 2,40  | 194                                                | 2,30  | 177                                                | 2     |
| 208                                                    | 2,85  | 262                                                | 1,64  | 360                                                   | 1,60  | 116                                                    | 3,20  | 139                                                | 2     | 280                                                | 1,87  |
| 300                                                    | 2,65  | 327                                                | 2,22  | 230                                                   | 2,11  | 323                                                    | 3     | 226                                                | 1,33  | 235                                                | 2,15  |
| 335                                                    | 2,50  | 197                                                | 2,16  | 283                                                   | 2     | 342                                                    | 2,66  | 105                                                | 3,33  | 161                                                | 1,88  |
| 151                                                    | 2,66  | 245                                                | 1,84  | 294                                                   | 2,15  | 346                                                    | 2,85  | 222                                                | (1)   | 169                                                | 1,88  |
| 175                                                    | 3     | 254                                                | 1,88  | 349                                                   | 2,37  | 120                                                    | 2,37  |                                                    |       | 162                                                | 1,94  |
| 123                                                    | 2,74  | 166                                                | 2     | 185                                                   | 1,80  | 347                                                    | 2,80  |                                                    |       | 325                                                | 2,08  |
| 160                                                    | 3,10  | 200                                                | 2     | 186                                                   | 2,33  | 229                                                    | 2,60  |                                                    |       | 319                                                | 1,94  |
| 231                                                    | 3,50  | 112                                                | 2,80  | 343                                                   | 2,10  | 338                                                    | 2,90  |                                                    |       | 354                                                | 1,76  |
| 174                                                    | 2,75  | 192                                                | 2,00  | 297                                                   | 2,50  | 118                                                    | 2     |                                                    |       | 205                                                | 2,50  |
| 337                                                    | 2,75  | 119                                                | 2,80  | 311                                                   | 1,88  | 188                                                    | 2,77  |                                                    |       | 203                                                | 2,28  |
| 173                                                    | 3     | 199                                                | 3,33  | 156                                                   | 2,14  | 329                                                    | 2,86  |                                                    |       | 333                                                | 2,14  |
| 355                                                    | 2,85  | 243                                                | 2     | 167                                                   | 1,83  | 17                                                     | 3,10  |                                                    |       | 170                                                | 2,40  |
| 189                                                    | 2,86  | 220                                                | 2     | 295                                                   | 1,88  |                                                        |       |                                                    |       | 183                                                | 2     |
| 212                                                    | 3     | 206                                                | 2,85  | 320                                                   | 1,88  |                                                        |       |                                                    |       | 264                                                | 2,33  |
| 367                                                    | 2,70  | 256                                                | 2,40  | 267                                                   | 2,11  |                                                        |       |                                                    |       | 348                                                | 2,12  |
| 306                                                    | 2,89  | 248                                                | 3,50  | 168                                                   | 2,05  |                                                        |       |                                                    |       | 178                                                | 2     |
|                                                        |       | 164                                                | 3,35  | 263                                                   | 2,42  |                                                        |       |                                                    |       | 356                                                | 2,13  |
|                                                        |       | 255                                                | 2,55  | 365                                                   | 1,85  |                                                        |       |                                                    |       | 304                                                | 2     |
|                                                        |       | 196                                                | 2,24  | 202                                                   | 2,20  |                                                        |       |                                                    |       | 282                                                | 1,90  |
|                                                        |       | 198                                                | 2,34  | 269                                                   | 1,81  |                                                        |       |                                                    |       | 201                                                | 1,84  |
|                                                        |       | 273                                                | 1,18  | 312                                                   | 2,08  |                                                        |       |                                                    |       | 284                                                | 2     |
|                                                        |       | 113                                                | 3,35  | 305                                                   | 1,95  |                                                        |       |                                                    |       | 353                                                | 1,83  |
|                                                        |       | 259                                                | 2     | 152                                                   | 1,88  |                                                        |       |                                                    |       | 330                                                | 2     |
|                                                        |       | 225                                                | 1,80  | 133                                                   | 2,12  |                                                        |       |                                                    |       |                                                    |       |
|                                                        |       | 241                                                | 2,80  | 187                                                   | 1,47  |                                                        |       |                                                    |       |                                                    |       |
|                                                        |       |                                                    |       | 217                                                   | 1,94  |                                                        |       |                                                    |       |                                                    |       |
|                                                        |       |                                                    |       | 150                                                   | 1,80  |                                                        |       |                                                    |       |                                                    |       |
|                                                        |       |                                                    |       | 153                                                   | 2,08  |                                                        |       |                                                    |       |                                                    |       |

(1) Pièce endommagée, non mesurée.



TABLEAU 23.

OSTÉOLOGIE DE L'APPAREIL HYO-BRANCHIAL  
CERATO-BRANCHIAL.  
RAPPORT KL/MN.

RÉCAPITULATION DES MOYENNES, ÉCART-TYPES ET ERREURS STANDARD.

|                                                               | Moyennes |      | Ecart-types |       | Erreurs standard |       |
|---------------------------------------------------------------|----------|------|-------------|-------|------------------|-------|
|                                                               | ♀        | ♂    | ♀           | ♂     | ♀                | ♂     |
| <i>Marmoratus</i><br>Race allopatrique<br>Sud : 49 animaux    | 2,87     | 2,87 | 0,158       | 0,142 | 0,022            | 0,020 |
| <i>Marmoratus</i><br>Race sympatrique<br>Mayenne : 64 animaux | 2,87     | 2,75 | 0,221       | 0,408 | 0,028            | 0,051 |
| <i>Blasii</i><br>Mayenne : 65 animaux                         | 2,42     | 2,53 | 0,603       | 0,574 | 0,075            | 0,072 |
| <i>Cristatus</i><br>Race sympatrique<br>Mayenne : 87 animaux  | 1,98     | 2,00 | 0,272       | 0,198 | 0,030            | 0,022 |
| <i>Cristatus</i><br>Race allopatrique<br>Paris : 36 animaux   | 1,94     | 1,96 | 0,161       | 0,163 | 0,027            | 0,027 |
| <i>Cristatus</i><br>Race allopatrique<br>Est : 40 animaux     | 1,95     | 1,94 | 0,122       | 0,088 | 0,020            | 0,014 |

#### b) ETUDE COMPARÉE DU CERATO-HYAL.

Le cerato-hyal présente, à sa partie antérieure, une profonde indentation, donnant à l'ensemble de la pièce l'aspect grossier de la lettre Y (fig. 21). La profondeur de l'indentation est beaucoup plus faible et, à la limite, à peu près nulle chez *cristatus*. Il est donc intéressant de comparer cet os dans les espèces parentales et chez l'hybride *blasii*. Nous appelons PQ, la longueur du segment défini sur la figure 21 (A) et exprimant la profondeur de l'indentation antérieure du cerato-hyal. Les valeurs de PQ sont données dans les tableaux 24, 25 et 26.

Malgré la petitesse de sa valeur absolue, la signification de ce caractère est extrêmement nette. Les moyennes qui sont de 1,14 pour l'ensemble des deux sexes de race allopatrique *marmoratus* et de 0,07 pour *cristatus* de même race allopatrique, séparent nettement les espèces parentales (Tableau 26). Entre celles-ci vient se placer *blasii* dont la moyenne pour l'ensemble des deux sexes est de 0,60. Si le cerato-hyal présente parfois une forme intermédiaire (fig. 21

TABLEAU 24.

OSTÉOLOGIE DE L'APPAREIL HYO-BRANCHIAL  
CERATO-HYAL. VALEUR DE PQ.  
Races allopatriques.

| Femelles                                         |              |                                                  |              |                                                 |              | Mâles                                            |              |                                                  |              |                                                 |              |
|--------------------------------------------------|--------------|--------------------------------------------------|--------------|-------------------------------------------------|--------------|--------------------------------------------------|--------------|--------------------------------------------------|--------------|-------------------------------------------------|--------------|
| <i>Marmoratus</i><br>Races Sud<br>Moyenne : 1,21 |              | <i>Cristatus</i><br>Race Paris<br>Moyenne : 0,08 |              | <i>Cristatus</i><br>Races Est<br>Moyenne : 0,07 |              | <i>Marmoratus</i><br>Races Sud<br>Moyenne : 1,04 |              | <i>Cristatus</i><br>Race Paris<br>Moyenne : 0,07 |              | <i>Cristatus</i><br>Races Est<br>Moyenne : 0,08 |              |
| N°<br>d'ordre                                    | PQ<br>en m/m | N°<br>d'ordre                                    | PQ<br>en m/m | N°<br>d'ordre                                   | PQ<br>en m/m | N°<br>d'ordre                                    | PQ<br>en m/m | N°<br>d'ordre                                    | PQ<br>en m/m | N°<br>d'ordre                                   | PQ<br>en m/m |
| Corrèze<br>Tulle                                 |              | Bas-Rhin<br>Strasbourg                           |              | Corrèze<br>Tulle                                |              | Bas-Rhin<br>Strasbourg                           |              |                                                  |              |                                                 |              |
| 145                                              | 1,6          | 96                                               | 0            | 59                                              | 0            | 136                                              | 1,1          | 141                                              | 0            | 24                                              | 0,1          |
| 142                                              | 1,2          | 97                                               | 0,1          | 29                                              | 0,1          | 63                                               | 1,5          | 95                                               | 0,1          | 15                                              | 0            |
| 146                                              | 1,5          | 147                                              | 0            | 90                                              | 0            | 58                                               | 0,8          | 92                                               | 0            | 25                                              | 0,1          |
| 135                                              | 1,4          | 93                                               | 0,1          | 70                                              | 0,1          | 57                                               | 1,2          | 3                                                | 0,1          | 76                                              | 0,1          |
| 124                                              | 1            | 100                                              | 0            | 26                                              | 0,1          | 130                                              | 1,2          | 101                                              | 0,1          | 16                                              | 0,2          |
| 228                                              | 1            | 98                                               | 0,2          | 91                                              | 0,1          | 129                                              | 1            | 50                                               | 0,2          | 30                                              | 0,1          |
| 122                                              | 1,1          | 99                                               | 0            | 27                                              | 0            | 134                                              | 1            | 31                                               | 0,2          | 38                                              | 0,1          |
| 372                                              | 1,2          | 37                                               | 0,1          | 14                                              | 0,1          | 127                                              | 1            | 4                                                | 0            | 78                                              | 0            |
| 140                                              | 1,1          | 87                                               | 0            | 22                                              | 0,1          | 132                                              | 1            | 102                                              | 0            | 28                                              | 0,1          |
| 366                                              | 1,6          | 86                                               | 0,1          | 12                                              | 0,1          | 126                                              | 0,9          | 2                                                | 0            | 21                                              | 0            |
| 117                                              | 1,7          | 45                                               | 0,2          | 88                                              | 0            |                                                  |              | 46                                               | 0,1          |                                                 |              |
| 121                                              | 1,1          | 85                                               | 0,1          |                                                 |              |                                                  |              | 36                                               | 0            |                                                 |              |
| 64                                               | 1,4          | 41                                               | 0            |                                                 |              |                                                  |              | 53                                               | 0,1          |                                                 |              |
| 62                                               | 1,2          | 32                                               | 0,2          |                                                 |              |                                                  |              | 40                                               | 0,1          |                                                 |              |
| 66                                               | 1            | 44                                               | 0            |                                                 |              |                                                  |              | 47                                               | 0            |                                                 |              |
| 55                                               | 1,1          | 49                                               | 0,1          |                                                 |              |                                                  |              | 52                                               | 0,1          |                                                 |              |
|                                                  |              | 35                                               | 0,2          |                                                 |              |                                                  |              |                                                  |              |                                                 |              |
|                                                  |              | 48                                               | 0,1          |                                                 |              |                                                  |              |                                                  |              |                                                 |              |
|                                                  |              | 43                                               | 0,1          |                                                 |              |                                                  |              |                                                  |              |                                                 |              |
|                                                  |              | 1                                                | 0,1          |                                                 |              |                                                  |              |                                                  |              |                                                 |              |
| Pyrénées-<br>Orientales<br>Banyuls               |              | Meurthe-<br>et-Moselle<br>Nancy                  |              | Pyrénées-<br>Orientales<br>Banyuls              |              | Meurthe-<br>et-Moselle<br>Nancy                  |              |                                                  |              |                                                 |              |
| 340                                              | 1,4          | 89                                               | 0,1          | 60                                              | 1,2          | 51                                               | 0,1          |                                                  |              |                                                 |              |
| 361                                              | 1,2          | 8                                                | 0            | 54                                              | 0,9          | 39                                               | 0            |                                                  |              |                                                 |              |
| 364                                              | 1            | 84                                               | 0,1          | 67                                              | 1,4          | 34                                               | 0,2          |                                                  |              |                                                 |              |
| 72                                               | 1,2          | 18                                               | 0,1          | 68                                              | 1,2          | 75                                               | 0            |                                                  |              |                                                 |              |
| 94                                               | 1,1          | 20                                               | 0,1          | 71                                              | 1,2          | 33                                               | 0,1          |                                                  |              |                                                 |              |
| 56                                               | 1,1          | 83                                               | 0,1          | 61                                              | 1,1          | 80                                               | 0,1          |                                                  |              |                                                 |              |
| 11                                               | 1            | 5                                                | 0,1          | 363                                             | 0,7          | 10                                               | 0,2          |                                                  |              |                                                 |              |
| 13                                               | 1,5          | 79                                               | 0,1          | 69                                              | 0,8          | 9                                                | 0,1          |                                                  |              |                                                 |              |
| 19                                               | 1            | 77                                               | 0            | 82                                              | 0,7          |                                                  |              |                                                  |              |                                                 |              |
| 74                                               | 1,3          | 6                                                | 0,1          | 65                                              | 1            |                                                  |              |                                                  |              |                                                 |              |
| 42                                               | 1            | 7                                                | 0,2          |                                                 |              |                                                  |              |                                                  |              |                                                 |              |
| 73                                               | 1,1          |                                                  |              |                                                 |              |                                                  |              |                                                  |              |                                                 |              |
| 81                                               | 1,2          |                                                  |              |                                                 |              |                                                  |              |                                                  |              |                                                 |              |



TABLEAU 25.  
OSTÉOLOGIE DE L'APPAREIL HYO-BRANCHIAL  
CERATO-HYAL. VALEUR DE PQ.  
Races sympatriques.

| Femelles                                               |              |                                                    |              |                                                       |              | Mâles                                                  |              |                                                    |              |                                                       |              |
|--------------------------------------------------------|--------------|----------------------------------------------------|--------------|-------------------------------------------------------|--------------|--------------------------------------------------------|--------------|----------------------------------------------------|--------------|-------------------------------------------------------|--------------|
| <i>Marmoratus</i><br>Race<br>Mayenne<br>Moyenne : 1,02 |              | <i>Blasii</i><br>Race<br>Mayenne<br>Moyenne : 0,53 |              | <i>Cristatus</i><br>Race<br>Mayenne<br>Moyenne : 0,16 |              | <i>Marmoratus</i><br>Race<br>Mayenne<br>Moyenne : 1,09 |              | <i>Blasii</i><br>Race<br>Mayenne<br>Moyenne : 0,76 |              | <i>Cristatus</i><br>Race<br>Mayenne<br>Moyenne : 0,07 |              |
| N°<br>d'ordre                                          | PQ<br>en m/m | N°<br>d'ordre                                      | PQ<br>en m/m | N°<br>d'ordre                                         | PQ<br>en m/m | N°<br>d'ordre                                          | PQ<br>en m/m | N°<br>d'ordre                                      | PQ<br>en m/m | N°<br>d'ordre                                         | PQ<br>en m/m |
| 307                                                    | 1,5          | 104                                                | 1,1          | 265                                                   | 0,1          | 213                                                    | 1,1          | 246                                                | 1,2          | 291                                                   | 0,2          |
| 296                                                    | 1,2          | 238                                                | 0,1          | 326                                                   | 0,3          | 292                                                    | 1            | 138                                                | 0,4          | 210                                                   | 0            |
| 131                                                    | 0,3          | 261                                                | 0            | 184                                                   | 0,6          | 171                                                    | 1            | 242                                                | 0,2          | 211                                                   | 0            |
| 321                                                    | 1,9          | 219                                                | 1,2          | 303                                                   | 0            | 232                                                    | 0,9          | 144                                                | 0,1          | 215                                                   | 0,1          |
| 289                                                    | 1,4          | 239                                                | 1,4          | 266                                                   | 0,3          | 193                                                    | 1,8          | 125                                                | 1,7          | 310                                                   | 0,1          |
| 179                                                    | 1            | 240                                                | 0,7          | 281                                                   | 0,7          | 257                                                    | 1,3          | 244                                                | 0,9          | 128                                                   | 0,2          |
| 332                                                    | 1,5          | 237                                                | 0,1          | 286                                                   | 0            | 299                                                    | 0,7          | 103                                                | 1,6          | 180                                                   | 0,1          |
| 272                                                    | 1,2          | 224                                                | 0,1          | 298                                                   | 1            | 143                                                    | 1,1          | 250                                                | 0            | 362                                                   | 0            |
| 236                                                    | 0,1          | 223                                                | 0,1          | 302                                                   | 0            | 271                                                    | 1,3          | 260                                                | 1,4          | 158                                                   | 0            |
| 214                                                    | 0,8          | 106                                                | 1,4          | 290                                                   | 0            | 234                                                    | 1,2          | 251                                                | 1,1          | 309                                                   | 0            |
| 322                                                    | 0,7          | 253                                                | 0,5          | 359                                                   | 0            | 324                                                    | 1,2          | 247                                                | 1,1          | 176                                                   | 0,1          |
| 172                                                    | 1,7          | 207                                                | 0            | 154                                                   | 1,1          | 181                                                    | 1,6          | 258                                                | 0,7          | 351                                                   | 0,1          |
| 345                                                    | 0,8          | 108                                                | 0            | 288                                                   | 0            | 182                                                    | 0,8          | 331                                                | 1            | 233                                                   | 0,2          |
| 308                                                    | 1,1          | 107                                                | 0,1          | 149                                                   | 0            | 352                                                    | 0,2          | 163                                                | 0            | 350                                                   | 0            |
| 336                                                    | 1,2          | 114                                                | 0,2          | 165                                                   | 0            | 339                                                    | 1,8          | 334                                                | 0,4          | 301                                                   | 0            |
| 341                                                    | 0,9          | 115                                                | 0,3          | 358                                                   | 0            | 191                                                    | 1,4          | 249                                                | 0,6          | 357                                                   | 0            |
| 328                                                    | 1,3          | 221                                                | 0            | 148                                                   | 0            | 159                                                    | 1,3          | 109                                                | 1,4          | 157                                                   | 0            |
| 137                                                    | 1,2          | 252                                                | 0            | 344                                                   | 0,1          | 209                                                    | 1            | 194                                                | 0            | 177                                                   | 0,1          |
| 208                                                    | 1            | 262                                                | 0            | 360                                                   | 0,3          | 116                                                    | 1            | 139                                                | 1,5          | 280                                                   | 0,1          |
| 300                                                    | 0,2          | 327                                                | 0,1          | 230                                                   | 0            | 323                                                    | 1            | 226                                                | 0,8          | 235                                                   | 0,2          |
| 335                                                    | 1            | 197                                                | 0,1          | 283                                                   | 0            | 342                                                    | 1,1          | 105                                                | 0            | 161                                                   | 0,1          |
| 151                                                    | 0,9          | 245                                                | 1,4          | 294                                                   | 0,2          | 346                                                    | 1,1          | 222                                                | (1)          | 169                                                   | 0,1          |
| 175                                                    | 1,2          | 254                                                | 1,5          | 349                                                   | 0,1          | 120                                                    | 1,1          |                                                    |              | 162                                                   | 0            |
| 123                                                    | 1,1          | 166                                                | 0,6          | 185                                                   | 0            | 347                                                    | 1            |                                                    |              | 325                                                   | 0            |
| 160                                                    | 0,9          | 200                                                | 1,2          | 186                                                   | 0,2          | 229                                                    | 1            |                                                    |              | 319                                                   | 0,1          |
| 231                                                    | 1,1          | 112                                                | 1            | 343                                                   | 0,2          | 338                                                    | 1,1          |                                                    |              | 354                                                   | 0            |
| 174                                                    | 1,2          | 192                                                | 0,6          | 297                                                   | 0            | 118                                                    | 0,7          |                                                    |              | 205                                                   | 0,2          |
| 337                                                    | 1,7          | 119                                                | 1,1          | 311                                                   | 0            | 188                                                    | 1,1          |                                                    |              | 203                                                   | 0,1          |
| 173                                                    | 0,6          | 199                                                | 0            | 156                                                   | 0,1          | 329                                                    | 0,2          |                                                    |              | 333                                                   | 0            |
| 355                                                    | 1            | 243                                                | 0            | 167                                                   | 0,2          | 17                                                     | 1,7          |                                                    |              | 170                                                   | 0            |
| 189                                                    | 0,7          | 220                                                | 0            | 295                                                   | 0            |                                                        |              |                                                    |              | 183                                                   | 0,1          |
| 212                                                    | 0,8          | 206                                                | 0            | 320                                                   | 0            |                                                        |              |                                                    |              | 264                                                   | 0            |
| 367                                                    | 0,8          | 256                                                | 0            | 267                                                   | 1,4          |                                                        |              |                                                    |              | 348                                                   | 0,1          |
| 306                                                    | 0,9          | 248                                                | 0            | 168                                                   | 0,2          |                                                        |              |                                                    |              | 178                                                   | 0            |
|                                                        |              | 164                                                | 1,4          | 263                                                   | 0,1          |                                                        |              |                                                    |              | 356                                                   | 0            |
|                                                        |              | 255                                                | 1,5          | 365                                                   | 0,1          |                                                        |              |                                                    |              | 304                                                   | 0,2          |
|                                                        |              | 196                                                | 1,7          | 202                                                   | 0            |                                                        |              |                                                    |              | 282                                                   | 0            |
|                                                        |              | 198                                                | 1,2          | 269                                                   | 0            |                                                        |              |                                                    |              | 201                                                   | 0,1          |
|                                                        |              | 273                                                | 0,8          | 312                                                   | 0,1          |                                                        |              |                                                    |              | 284                                                   | 0,1          |
|                                                        |              | 113                                                | 0            | 305                                                   | 0,1          |                                                        |              |                                                    |              | 353                                                   | 0,2          |
|                                                        |              | 259                                                | 0,1          | 152                                                   | 0            |                                                        |              |                                                    |              | 330                                                   | 0,1          |
|                                                        |              | 225                                                | 0,1          | 133                                                   | 0            |                                                        |              |                                                    |              |                                                       |              |
|                                                        |              | 241                                                | 1,4          | 187                                                   | 0            |                                                        |              |                                                    |              |                                                       |              |
|                                                        |              |                                                    |              | 217                                                   | 0            |                                                        |              |                                                    |              |                                                       |              |
|                                                        |              |                                                    |              | 150                                                   | 0            |                                                        |              |                                                    |              |                                                       |              |
|                                                        |              |                                                    |              | 153                                                   | 0            |                                                        |              |                                                    |              |                                                       |              |

(1) pièce endommagée,  
non mesurée.

TABLEAU 26.  
OSTÉOLOGIE DE L'APPAREIL HYO-BRANCHIAL  
CERATO-HYAL. VALEUR DE PQ.  
RÉCAPITULATION DES MOYENNES, ÉCART-TYPES ET ERREURS STANDARD.

|                                                               | Moyennes |      | Ecart-types |       | Erreurs standard |       |
|---------------------------------------------------------------|----------|------|-------------|-------|------------------|-------|
|                                                               | ♀        | ♂    | ♀           | ♂     | ♀                | ♂     |
| <i>Marmoratus</i><br>Race allopatrique<br>Sud : 49 animaux    | 1,21     | 1,04 | 0,205       | 0,208 | 0,029            | 0,030 |
| <i>Marmoratus</i><br>Race sympatrique<br>Mayenne : 64 animaux | 1,02     | 1,09 | 0,393       | 0,363 | 0,049            | 0,045 |
| <i>Blasii</i><br>Mayenne : 65 animaux                         | 0,53     | 0,76 | 0,587       | 0,548 | 0,073            | 0,068 |
| <i>Cristatus</i><br>Race sympatrique<br>Mayenne : 87 animaux  | 0,16     | 0,07 | 0,306       | 0,072 | 0,034            | 0,008 |
| <i>Cristatus</i><br>Race allopatrique<br>Paris : 36 animaux   | 0,08     | 0,07 | 0,074       | 0,067 | 0,012            | 0,011 |
| <i>Cristatus</i><br>Race allopatrique<br>Est : 40 animaux     | 0,07     | 0,08 | 0,051       | 0,066 | 0,008            | 0,011 |

D), il ressemble le plus souvent à l'une ou à l'autre des espèces parentales. Les écart-types faibles chez les races allopatriques, deviennent plus forts chez les races sympatriques. Plus faibles, dans tous les cas, chez *cristatus* que chez *marmoratus*, ils montrent une plus grande homogénéité du groupe *cristatus*. Pour *blasii*, nous relevons les écart-types les plus importants, témoins d'une grande hétérogénéité chez l'hybride. Erreurs standard et intervalles de sécurité font apparaître des espèces parentales bien séparées, entre lesquelles vient se placer *blasii*. L'histogramme (fig. 23) traduit graphiquement ces faits.

L'étude de l'appareil hyo-branchial montre que *blasii* se situe pour ce caractère entre les espèces parentales. La variation des mesures est nettement moindre pour les races allopatriques que pour les races sympatriques. Elle est très étendue pour *blasii*, comparable à cet égard aux *marmoratus* de la Mayenne.



TABEAU 27.

NOMBRE DE DENTS PORTÉES PAR LE MAXILLAIRE.  
Races allopatriques.

| Femelles                                       |                    |                                                |                    |                                               |                    | Mâles                                          |                    |                                                |                    |                                               |                    |
|------------------------------------------------|--------------------|------------------------------------------------|--------------------|-----------------------------------------------|--------------------|------------------------------------------------|--------------------|------------------------------------------------|--------------------|-----------------------------------------------|--------------------|
| <i>Marmoratus</i><br>Races Sud<br>Moyenne : 30 |                    | <i>Cristatus</i><br>Race Paris<br>Moyenne : 49 |                    | <i>Cristatus</i><br>Races Est<br>Moyenne : 48 |                    | <i>Marmoratus</i><br>Races Sud<br>Moyenne : 27 |                    | <i>Cristatus</i><br>Race Paris<br>Moyenne : 48 |                    | <i>Cristatus</i><br>Races Est<br>Moyenne : 48 |                    |
| N°<br>d'ordre                                  | Nombre<br>de dents | N°<br>d'ordre                                  | Nombre<br>de dents | N°<br>d'ordre                                 | Nombre<br>de dents | N°<br>d'ordre                                  | Nombre<br>de dents | N°<br>d'ordre                                  | Nombre<br>de dents | N°<br>d'ordre                                 | Nombre<br>de dents |
| Corrèze<br>Tulle                               |                    |                                                |                    | Bas-Rhin<br>Strasbourg                        |                    | Corrèze<br>Tulle                               |                    |                                                |                    | Bas-Rhin<br>Strasbourg                        |                    |
| 145                                            | 32                 | 96                                             | 29                 | 59                                            | 15                 | 136                                            | 22                 | 141                                            | 18                 | 24                                            | 18                 |
| 142                                            | 29                 | 97                                             | 19                 | 29                                            | 16                 | 63                                             | 29                 | 95                                             | 18                 | 15                                            | 18                 |
| 146                                            | 32                 | 147                                            | 25                 | 90                                            | 20                 | 58                                             | 31                 | 92                                             | 19                 | 25                                            | 19                 |
| 135                                            | 31                 | 93                                             | 19                 | 70                                            | 22                 | 57                                             | 30                 | 3                                              | 19                 | 76                                            | 19                 |
| 124                                            | 30                 | 100                                            | 15                 | 26                                            | 20                 | 130                                            | 28                 | 101                                            | 17                 | 16                                            | 19                 |
| 228                                            | 32                 | 98                                             | 22                 | 91                                            | 18                 | 129                                            | 30                 | 50                                             | 27                 | 30                                            | 21                 |
| 122                                            | 36                 | 99                                             | 19                 | 27                                            | 18                 | 134                                            | 31                 | 31                                             | 16                 | 38                                            | 22                 |
| 372                                            | 29                 | 37                                             | 15                 | 14                                            | 17                 | 127                                            | 28                 | 4                                              | 19                 | 78                                            | 19                 |
| 140                                            | 27                 | 87                                             | 22                 | 22                                            | 17                 | 132                                            | 26                 | 102                                            | 21                 | 28                                            | 17                 |
| 366                                            | 32                 | 86                                             | 21                 | 12                                            | 17                 | 126                                            | 30                 | 2                                              | 20                 | 21                                            | 19                 |
| 117                                            | 30                 | 45                                             | 21                 | 88                                            | 20                 |                                                |                    | 46                                             | 14                 |                                               |                    |
| 121                                            | 29                 | 85                                             | 15                 |                                               |                    |                                                |                    | 36                                             | 19                 |                                               |                    |
| 64                                             | 30                 | 41                                             | 19                 |                                               |                    |                                                |                    | 53                                             | 16                 |                                               |                    |
| 62                                             | 24                 | 32                                             | 19                 |                                               |                    |                                                |                    | 40                                             | 19                 |                                               |                    |
| 66                                             | 31                 | 44                                             | 15                 |                                               |                    |                                                |                    | 47                                             | 16                 |                                               |                    |
| 55                                             | 31                 | 49                                             | 19                 |                                               |                    |                                                |                    | 52                                             | 19                 |                                               |                    |
|                                                |                    | 35                                             | 19                 |                                               |                    |                                                |                    |                                                |                    |                                               |                    |
|                                                |                    | 48                                             | 18                 |                                               |                    |                                                |                    |                                                |                    |                                               |                    |
|                                                |                    | 43                                             | 20                 |                                               |                    |                                                |                    |                                                |                    |                                               |                    |
|                                                |                    | 1                                              | 15                 |                                               |                    |                                                |                    |                                                |                    |                                               |                    |
| Pyrénées-<br>Orientales<br>Banyuls             |                    |                                                |                    | Meurthe-<br>et-Moselle<br>Nancy               |                    | Pyrénées-<br>Orientales<br>Banyuls             |                    |                                                |                    | Meurthe-<br>et-Moselle<br>Nancy               |                    |
| 340                                            | 28                 |                                                |                    | 89                                            | 19                 | 60                                             | 30                 | 51                                             | 18                 |                                               |                    |
| 361                                            | 32                 |                                                |                    | 8                                             | 18                 | 54                                             | 21                 | 39                                             | 20                 |                                               |                    |
| 364                                            | 31                 |                                                |                    | 84                                            | 19                 | 67                                             | 23                 | 34                                             | 15                 |                                               |                    |
| 72                                             | 34                 |                                                |                    | 18                                            | 20                 | 68                                             | 32                 | 75                                             | 18                 |                                               |                    |
| 94                                             | 37                 |                                                |                    | 20                                            | 19                 | 71                                             | 23                 | 33                                             | 16                 |                                               |                    |
| 56                                             | 32                 |                                                |                    | 83                                            | 19                 | 61                                             | 30                 | 80                                             | 16                 |                                               |                    |
| 11                                             | 30                 |                                                |                    | 5                                             | 18                 | 363                                            | 28                 | 10                                             | 16                 |                                               |                    |
| 13                                             | 31                 |                                                |                    | 79                                            | 19                 | 69                                             | 32                 | 9                                              | 18                 |                                               |                    |
| 19                                             | 31                 |                                                |                    | 77                                            | 20                 | 82                                             | 30                 |                                                |                    |                                               |                    |
| 74                                             | 30                 |                                                |                    | 6                                             | 19                 | 65                                             | 23                 |                                                |                    |                                               |                    |
| 42                                             | 31                 |                                                |                    | 7                                             | 19                 |                                                |                    |                                                |                    |                                               |                    |
| 73                                             | 32                 |                                                |                    |                                               |                    |                                                |                    |                                                |                    |                                               |                    |
| 81                                             | 24                 |                                                |                    |                                               |                    |                                                |                    |                                                |                    |                                               |                    |

TABEAU 28.  
NOMBRE DE DENTS PORTÉES PAR LE MAXILLAIRE.  
Races sympatriques.

| Femelles                                  |                    |                                       |                    |                                          |                    | Mâles                                     |                    |                                       |                    |                                          |                    |
|-------------------------------------------|--------------------|---------------------------------------|--------------------|------------------------------------------|--------------------|-------------------------------------------|--------------------|---------------------------------------|--------------------|------------------------------------------|--------------------|
| <i>Marmoratus</i><br>Race<br>Moyenne : 29 |                    | <i>Blasii</i><br>Race<br>Moyenne : 28 |                    | <i>Cristatus</i><br>Race<br>Moyenne : 24 |                    | <i>Marmoratus</i><br>Race<br>Moyenne : 26 |                    | <i>Blasii</i><br>Race<br>Moyenne : 24 |                    | <i>Cristatus</i><br>Race<br>Moyenne : 24 |                    |
| N°<br>d'ordre                             | Nombre<br>de dents | N°<br>d'ordre                         | Nombre<br>de dents | N°<br>d'ordre                            | Nombre<br>de dents | N°<br>d'ordre                             | Nombre<br>de dents | N°<br>d'ordre                         | Nombre<br>de dents | N°<br>d'ordre                            | Nombre<br>de dents |
| 307                                       | 36                 | 104                                   | (1)                | 265                                      | 18                 | 213                                       | 29                 | 246                                   | 18                 | 291                                      | 21                 |
| 296                                       | 36                 | 238                                   | 36                 | 326                                      | 22                 | 292                                       | 21                 | 138                                   | 28                 | 210                                      | 19                 |
| 131                                       | 29                 | 261                                   | 37                 | 184                                      | 22                 | 171                                       | 22                 | 242                                   | 29                 | 211                                      | 18                 |
| 321                                       | 33                 | 219                                   | 32                 | 303                                      | 19                 | 232                                       | 31                 | 144                                   | 26                 | 215                                      | 17                 |
| 289                                       | 27                 | 239                                   | 39                 | 266                                      | 24                 | 193                                       | 24                 | 125                                   | 26                 | 310                                      | 24                 |
| 179                                       | 32                 | 240                                   | 32                 | 281                                      | 18                 | 257                                       | 24                 | 244                                   | 26                 | 128                                      | 13                 |
| 332                                       | 30                 | 237                                   | 25                 | 286                                      | 26                 | 299                                       | 24                 | 103                                   | 26                 | 180                                      | 28                 |
| 272                                       | 27                 | 224                                   | 32                 | 298                                      | 25                 | 143                                       | 28                 | 250                                   | 17                 | 362                                      | 28                 |
| 236                                       | 31                 | 223                                   | 38                 | 302                                      | 24                 | 271                                       | 31                 | 260                                   | 26                 | 158                                      | 28                 |
| 214                                       | 30                 | 106                                   | 39                 | 290                                      | 26                 | 234                                       | 28                 | 251                                   | 28                 | 309                                      | 24                 |
| 322                                       | 33                 | 253                                   | (1)                | 359                                      | 26                 | 324                                       | 28                 | 247                                   | 24                 | 176                                      | 22                 |
| 172                                       | 31                 | 207                                   | 28                 | 154                                      | 24                 | 181                                       | 24                 | 258                                   | 26                 | 351                                      | 23                 |
| 345                                       | 30                 | 108                                   | 34                 | 288                                      | 24                 | 182                                       | 30                 | 331                                   | 25                 | 233                                      | 19                 |
| 308                                       | 32                 | 107                                   | 33                 | 149                                      | 23                 | 352                                       | 26                 | 163                                   | 26                 | 350                                      | 20                 |
| 336                                       | 30                 | 114                                   | 21                 | 165                                      | 18                 | 339                                       | 28                 | 334                                   | 24                 | 301                                      | 24                 |
| 341                                       | 32                 | 115                                   | 28                 | 358                                      | 20                 | 191                                       | 28                 | 249                                   | 28                 | 357                                      | 25                 |
| 328                                       | 29                 | 221                                   | 28                 | 148                                      | 22                 | 159                                       | 24                 | 109                                   | 18                 | 157                                      | 26                 |
| 137                                       | 26                 | 252                                   | 29                 | 344                                      | 20                 | 209                                       | 22                 | 194                                   | 24                 | 177                                      | 19                 |
| 208                                       | 22                 | 262                                   | 24                 | 360                                      | 18                 | 116                                       | 26                 | 139                                   | 26                 | 280                                      | 24                 |
| 300                                       | 30                 | 327                                   | 30                 | 230                                      | 20                 | 323                                       | 30                 | 226                                   | 18                 | 235                                      | 20                 |
| 335                                       | 32                 | 197                                   | 30                 | 283                                      | 19                 | 342                                       | 32                 | 105                                   | 24                 | 161                                      | 24                 |
| 151                                       | 28                 | 245                                   | 30                 | 294                                      | 24                 | 346                                       | 30                 | 222                                   | 16                 | 169                                      | 20                 |
| 175                                       | 28                 | 254                                   | 30                 | 349                                      | 24                 | 120                                       | 28                 |                                       |                    | 162                                      | 18                 |
| 123                                       | 34                 | 166                                   | 30                 | 185                                      | 20                 | 347                                       | 28                 |                                       |                    | 325                                      | 20                 |
| 160                                       | 34                 | 200                                   | 32                 | 186                                      | 21                 | 229                                       | 22                 |                                       |                    | 319                                      | 18                 |
| 231                                       | 30                 | 112                                   | 34                 | 343                                      | 21                 | 338                                       | 24                 |                                       |                    | 354                                      | 20                 |
| 174                                       | 25                 | 192                                   | 22                 | 297                                      | 18                 | 118                                       | 24                 |                                       |                    | 205                                      | 24                 |
| 337                                       | 28                 | 119                                   | 24                 | 311                                      | 23                 | 188                                       | 24                 |                                       |                    | 203                                      | 20                 |
| 173                                       | 24                 | 199                                   | 24                 | 156                                      | 20                 | 329                                       | 26                 |                                       |                    | 333                                      | 23                 |
| 355                                       | 27                 | 243                                   | 22                 | 167                                      | 23                 | 17                                        | 30                 |                                       |                    | 170                                      | 18                 |
| 189                                       | 21                 | 220                                   | 19                 | 295                                      | 26                 |                                           |                    |                                       |                    | 183                                      | 24                 |
| 212                                       | 27                 | 206                                   | 26                 | 320                                      | 22                 |                                           |                    |                                       |                    | 264                                      | 26                 |
| 367                                       | 30                 | 256                                   | (1)                | 267                                      | 19                 |                                           |                    |                                       |                    | 348                                      | 22                 |
| 306                                       | 32                 | 248                                   | 23                 | 168                                      | 22                 |                                           |                    |                                       |                    | 178                                      | 22                 |
|                                           |                    | 164                                   | 24                 | 263                                      | 22                 |                                           |                    |                                       |                    | 356                                      | 18                 |
|                                           |                    | 255                                   | 26                 | 365                                      | 18                 |                                           |                    |                                       |                    | 304                                      | 20                 |
|                                           |                    | 196                                   | 26                 | 202                                      | 20                 |                                           |                    |                                       |                    | 282                                      | 18                 |
|                                           |                    | 198                                   | 36                 | 269                                      | 17                 |                                           |                    |                                       |                    | 201                                      | 20                 |
|                                           |                    | 273                                   | 28                 | 312                                      | 24                 |                                           |                    |                                       |                    | 284                                      | 16                 |
|                                           |                    | 113                                   | 24                 | 305                                      | 19                 |                                           |                    |                                       |                    | 353                                      | 18                 |
|                                           |                    | 259                                   | 20                 | 152                                      | 21                 |                                           |                    |                                       |                    | 330                                      | 20                 |
|                                           |                    | 225                                   | 21                 | 133                                      | 24                 |                                           |                    |                                       |                    |                                          |                    |
|                                           |                    | 241                                   | 29                 | 187                                      | 18                 |                                           |                    |                                       |                    |                                          |                    |
|                                           |                    |                                       |                    | 217                                      | 18                 |                                           |                    |                                       |                    |                                          |                    |
|                                           |                    |                                       |                    | 150                                      | 21                 |                                           |                    |                                       |                    |                                          |                    |
|                                           |                    |                                       |                    | 153                                      | 24                 |                                           |                    |                                       |                    |                                          |                    |

(1) Pièce endommagée, non comptée.







TABLEAU 31.  
NOMBRE DE DENTS PORTÉES PAR LE DENTAIRE.  
Races sympatriques.

| Femelles                                             |                    |                                                  |                    |                                                     |                    | Mâles                                                |                    |                                                  |                    |                                                     |                    |
|------------------------------------------------------|--------------------|--------------------------------------------------|--------------------|-----------------------------------------------------|--------------------|------------------------------------------------------|--------------------|--------------------------------------------------|--------------------|-----------------------------------------------------|--------------------|
| <i>Marmoratus</i><br>Race<br>Mayenne<br>Moyenne : 47 |                    | <i>Blasii</i><br>Race<br>Mayenne<br>Moyenne : 46 |                    | <i>Cristatus</i><br>Race<br>Mayenne<br>Moyenne : 36 |                    | <i>Marmoratus</i><br>Race<br>Mayenne<br>Moyenne : 43 |                    | <i>Blasii</i><br>Race<br>Mayenne<br>Moyenne : 43 |                    | <i>Cristatus</i><br>Race<br>Mayenne<br>Moyenne : 37 |                    |
| N°<br>d'ordre                                        | Nombre<br>de dents | N°<br>d'ordre                                    | Nombre<br>de dents | N°<br>d'ordre                                       | Nombre<br>de dents | N°<br>d'ordre                                        | Nombre<br>de dents | N°<br>d'ordre                                    | Nombre<br>de dents | N°<br>d'ordre                                       | Nombre<br>de dents |
| 307                                                  | 62                 | 104                                              | (1)                | 265                                                 | 34                 | 213                                                  | 40                 | 246                                              | 44                 | 291                                                 | 34                 |
| 296                                                  | 56                 | 238                                              | 56                 | 326                                                 | 32                 | 292                                                  | 44                 | 138                                              | 53                 | 210                                                 | 32                 |
| 131                                                  | 64                 | 261                                              | 47                 | 184                                                 | 48                 | 171                                                  | 40                 | 242                                              | 50                 | 211                                                 | 38                 |
| 321                                                  | 55                 | 219                                              | 52                 | 303                                                 | 47                 | 232                                                  | 40                 | 144                                              | 50                 | 215                                                 | 42                 |
| 289                                                  | 46                 | 239                                              | 48                 | 266                                                 | 42                 | 193                                                  | 52                 | 125                                              | 44                 | 310                                                 | 37                 |
| 179                                                  | 48                 | 240                                              | 56                 | 281                                                 | 30                 | 257                                                  | 34                 | 244                                              | 42                 | 128                                                 | 32                 |
| 332                                                  | 48                 | 237                                              | 48                 | 286                                                 | 48                 | 299                                                  | 46                 | 103                                              | 44                 | 180                                                 | 40                 |
| 272                                                  | 38                 | 224                                              | 56                 | 298                                                 | 34                 | 143                                                  | 48                 | 250                                              | 34                 | 362                                                 | 42                 |
| 236                                                  | 58                 | 223                                              | 58                 | 302                                                 | 34                 | 271                                                  | 51                 | 260                                              | 42                 | 158                                                 | 40                 |
| 214                                                  | 56                 | 106                                              | 49                 | 290                                                 | 32                 | 234                                                  | 50                 | 251                                              | 55                 | 309                                                 | 38                 |
| 322                                                  | 57                 | 253                                              | (1)                | 359                                                 | 38                 | 324                                                  | 50                 | 247                                              | 52                 | 176                                                 | 36                 |
| 172                                                  | 46                 | 207                                              | 50                 | 154                                                 | 36                 | 181                                                  | 49                 | 258                                              | 46                 | 351                                                 | 47                 |
| 345                                                  | 45                 | 108                                              | 44                 | 288                                                 | 36                 | 182                                                  | 40                 | 331                                              | 47                 | 233                                                 | 38                 |
| 308                                                  | 54                 | 107                                              | 64                 | 149                                                 | 44                 | 352                                                  | 42                 | 163                                              | 48                 | 350                                                 | 45                 |
| 336                                                  | 55                 | 114                                              | 37                 | 165                                                 | 43                 | 339                                                  | 43                 | 334                                              | 42                 | 301                                                 | 46                 |
| 341                                                  | 50                 | 115                                              | 50                 | 358                                                 | 42                 | 191                                                  | 46                 | 249                                              | 48                 | 357                                                 | 44                 |
| 328                                                  | 36                 | 221                                              | 42                 | 148                                                 | 30                 | 159                                                  | 41                 | 109                                              | 38                 | 157                                                 | 40                 |
| 137                                                  | 23                 | 252                                              | 56                 | 344                                                 | 38                 | 209                                                  | 44                 | 194                                              | 44                 | 177                                                 | 44                 |
| 208                                                  | 32                 | 262                                              | 42                 | 360                                                 | 34                 | 116                                                  | 48                 | 139                                              | 41                 | 280                                                 | 34                 |
| 300                                                  | 54                 | 327                                              | 50                 | 230                                                 | 40                 | 323                                                  | 50                 | 226                                              | 36                 | 235                                                 | 34                 |
| 335                                                  | 52                 | 197                                              | 48                 | 283                                                 | 42                 | 342                                                  | 48                 | 105                                              | 38                 | 161                                                 | 45                 |
| 151                                                  | 52                 | 245                                              | 47                 | 294                                                 | 36                 | 346                                                  | 45                 | 222                                              | 28                 | 169                                                 | 38                 |
| 175                                                  | 47                 | 254                                              | 39                 | 349                                                 | 37                 | 120                                                  | 42                 |                                                  |                    | 162                                                 | 35                 |
| 123                                                  | 36                 | 166                                              | 50                 | 185                                                 | 45                 | 347                                                  | 44                 |                                                  |                    | 325                                                 | 34                 |
| 160                                                  | 40                 | 200                                              | 42                 | 186                                                 | 36                 | 229                                                  | 44                 |                                                  |                    | 319                                                 | 32                 |
| 231                                                  | 45                 | 112                                              | 45                 | 343                                                 | 43                 | 338                                                  | 47                 |                                                  |                    | 354                                                 | 36                 |
| 174                                                  | 52                 | 192                                              | 42                 | 297                                                 | 44                 | 118                                                  | 34                 |                                                  |                    | 205                                                 | 38                 |
| 337                                                  | 44                 | 119                                              | 46                 | 311                                                 | 38                 | 188                                                  | 38                 |                                                  |                    | 203                                                 | 34                 |
| 173                                                  | 37                 | 199                                              | 46                 | 156                                                 | 36                 | 329                                                  | 36                 |                                                  |                    | 333                                                 | 36                 |
| 355                                                  | 51                 | 243                                              | 40                 | 167                                                 | 31                 | 17                                                   | 37                 |                                                  |                    | 170                                                 | 32                 |
| 189                                                  | 23                 | 220                                              | 32                 | 295                                                 | 30                 |                                                      |                    |                                                  |                    | 183                                                 | 46                 |
| 212                                                  | 45                 | 206                                              | 38                 | 320                                                 | 38                 |                                                      |                    |                                                  |                    | 264                                                 | 38                 |
| 367                                                  | 53                 | 256                                              | (1)                | 267                                                 | 36                 |                                                      |                    |                                                  |                    | 348                                                 | 38                 |
| 306                                                  | 55                 | 248                                              | 42                 | 168                                                 | 43                 |                                                      |                    |                                                  |                    | 178                                                 | 38                 |
|                                                      |                    | 164                                              | 40                 | 263                                                 | 36                 |                                                      |                    |                                                  |                    | 356                                                 | 35                 |
|                                                      |                    | 255                                              | 48                 | 365                                                 | 32                 |                                                      |                    |                                                  |                    | 304                                                 | 32                 |
|                                                      |                    | 196                                              | 47                 | 202                                                 | 33                 |                                                      |                    |                                                  |                    | 282                                                 | 34                 |
|                                                      |                    | 198                                              | 47                 | 269                                                 | 33                 |                                                      |                    |                                                  |                    | 201                                                 | 30                 |
|                                                      |                    | 273                                              | 32                 | 312                                                 | 36                 |                                                      |                    |                                                  |                    | 284                                                 | 30                 |
|                                                      |                    | 113                                              | 38                 | 305                                                 | 38                 |                                                      |                    |                                                  |                    | 353                                                 | 38                 |
|                                                      |                    | 259                                              | 36                 | 152                                                 | 37                 |                                                      |                    |                                                  |                    | 330                                                 | 30                 |
|                                                      |                    | 225                                              | 57                 | 133                                                 | 32                 |                                                      |                    |                                                  |                    |                                                     |                    |
|                                                      |                    | 241                                              | 49                 | 187                                                 | 30                 |                                                      |                    |                                                  |                    |                                                     |                    |
|                                                      |                    |                                                  |                    | 217                                                 | 27                 |                                                      |                    |                                                  |                    |                                                     |                    |
|                                                      |                    |                                                  |                    | 150                                                 | 37                 |                                                      |                    |                                                  |                    |                                                     |                    |
|                                                      |                    |                                                  |                    | 153                                                 | 32                 |                                                      |                    |                                                  |                    |                                                     |                    |

(1) Pièce endommagée, non comptée.

TABLEAU 32.  
NOMBRE DE DENTS PORTÉES PAR LE DENTAIRE.  
RÉCAPITULATION DES MOYENNES, ÉCART-TYPES ET ERREURS STANDARD.

|                                                               | Moyennes |    | Ecart-types |      | Erreurs standard |      |
|---------------------------------------------------------------|----------|----|-------------|------|------------------|------|
|                                                               | ♀        | ♂  | ♀           | ♂    | ♀                | ♂    |
| <i>Marmoratus</i><br>Race allopatrique<br>Sud : 49 animaux    | 45       | 47 | 3,66        | 4,87 | 0,52             | 0,69 |
| <i>Marmoratus</i><br>Race sympatrique<br>Mayenne : 64 animaux | 47       | 43 | 9,69        | 5,02 | 1,21             | 0,63 |
| <i>Blasii</i><br>Mayenne : 65 animaux                         | 46       | 43 | 7,12        | 6,44 | 0,89             | 0,80 |
| <i>Cristatus</i><br>Race sympatrique<br>Mayenne : 87 animaux  | 36       | 37 | 5,26        | 4,71 | 0,58             | 0,52 |
| <i>Cristatus</i><br>Race allopatrique<br>Paris : 36 animaux   | 31       | 31 | 4,38        | 3,39 | 0,73             | 0,56 |
| <i>Cristatus</i><br>Race allopatrique<br>Est : 40 animaux     | 30       | 28 | 2,19        | 3,53 | 0,36             | 0,59 |

\*\*\*

Il existe, à côté de ces caractères différentiels, d'autres éléments qui séparent les espèces *cristatus*, *marmoratus* et *blasii*. Parmi ceux-ci, il convient de signaler la forme de l'os maxillaire (fig. 26), les prévomero-palatins (fig. 27), les ptérygoïdes et l'ischio-pubis (VALLÉE, 1951). La forme du foie diffère également. Cependant, ce sont là des caractères dont l'appréciation reste trop subjective pour pouvoir utilement être prise en considération et nous nous bornons à les signaler.

#### CONCLUSIONS.

— Le nombre des vertèbres présacrées est un sûr critère de détermination de l'espèce. Il caractérise l'individu avec une excellente précision, qu'il s'agisse de *cristatus*, de *marmoratus* ou de *blasii*. En ce qui concerne ce dernier, il démontre par une valeur proche d'une véritable moyenne arithmétique de  $\frac{14 + 17}{2}$  la position intermédiaire de l'hybride entre les espèces parentales.

— La corrélation huméro-fémorale explique l'allure différente de



TABLE S1 Idem supplementary fig. S1, tabulated. The information that links individual data for character 9 (the number of rib-bearing vertebrae) to the remainder was kindly provided by the author (L. Vallée, pers. comm. 1986).

| Number | Species              | Sex    | Locality   | Character |     |        |        |      |     |    |    |    |
|--------|----------------------|--------|------------|-----------|-----|--------|--------|------|-----|----|----|----|
|        |                      |        |            | 1         | 2   | 3      | 4      | 5    | 6   | 7  | 8  | 9  |
| 1      | <i>T. cristatus</i>  | Female | Paris      | 6.0       | 5.4 | 0.9030 | 0.4624 | 2.00 | 0.1 | 15 | 25 | 17 |
| 2      | <i>T. cristatus</i>  | Male   | Paris      | 7.6       | 6.5 | 1.0492 | 0.6020 | 1.90 | 0.0 | 20 | 30 | 17 |
| 3      | <i>T. cristatus</i>  | Male   | Paris      | 7.8       | 6.6 | 1.0791 | 0.6384 | 1.81 | 0.1 | 19 | 29 | 17 |
| 4      | <i>T. cristatus</i>  | Male   | Paris      | 7.7       | 6.6 | 1.0644 | 0.6020 | 1.81 | 0.0 | 19 | 31 | 17 |
| 5      | <i>T. cristatus</i>  | Female | Nancy      | 7.8       | 6.8 | 1.0453 | 0.5563 | 2.25 | 0.1 | 18 | 31 | 17 |
| 6      | <i>T. cristatus</i>  | Female | Nancy      | 7.0       | 6.4 | 0.9030 | 0.4548 | 2.00 | 0.1 | 19 | 32 | 17 |
| 7      | <i>T. cristatus</i>  | Female | Nancy      | 7.0       | 6.3 | 1.0607 | 0.5378 | 2.00 | 0.2 | 19 | 33 | 17 |
| 8      | <i>T. cristatus</i>  | Female | Nancy      | 8.2       | 7.9 | 1.0607 | 0.6020 | 1.88 | 0.0 | 18 | 32 | 17 |
| 9      | <i>T. cristatus</i>  | Male   | Nancy      | 9.1       | 8.4 | 1.0492 | 0.6074 | 2.00 | 0.1 | 18 | 28 | 17 |
| 10     | <i>T. cristatus</i>  | Male   | Nancy      | 8.2       | 7.4 | 1.0453 | 0.5682 | 1.92 | 0.2 | 16 | 26 | 17 |
| 11     | <i>T. marmoratus</i> | Female | Banyuls    | 9.5       | 9.5 | 1.1303 | 0.6989 | 2.82 | 1.0 | 30 | 48 | 14 |
| 12     | <i>T. cristatus</i>  | Female | Strasbourg | 8.0       | 7.5 | 1.0718 | 0.5966 | 1.81 | 0.1 | 17 | 30 | 17 |
| 13     | <i>T. marmoratus</i> | Female | Banyuls    | 10.0      | 9.8 | 1.1205 | 0.7403 | 2.82 | 1.5 | 31 | 44 | 14 |
| 14     | <i>T. cristatus</i>  | Female | Strasbourg | 8.0       | 7.3 | 1.0827 | 0.5910 | 2.07 | 0.1 | 17 | 29 | 18 |
| 15     | <i>T. cristatus</i>  | Male   | Strasbourg | 8.2       | 7.5 | 1.0827 | 0.5966 | 1.88 | 0.0 | 18 | 30 | 17 |
| 16     | <i>T. cristatus</i>  | Male   | Strasbourg | 7.8       | 7.0 | 1.0827 | 0.6074 | 1.84 | 0.2 | 19 | 31 | 17 |
| 17     | <i>T. marmoratus</i> | Male   | Mayenne    | 9.5       | 8.0 | 1.1020 | 0.6946 | 3.10 | 1.7 | 30 | 37 | 15 |
| 18     | <i>T. cristatus</i>  | Female | Nancy      | 8.5       | 7.9 | 1.1072 | 0.6674 | 1.80 | 0.1 | 20 | 30 | 17 |
| 19     | <i>T. marmoratus</i> | Female | Banyuls    | 8.7       | 8.0 | 1.1105 | 0.7364 | 3.00 | 1.0 | 31 | 44 | 14 |
| 20     | <i>T. cristatus</i>  | Female | Nancy      | 8.2       | 7.0 | 1.0791 | 0.6532 | 1.90 | 0.1 | 19 | 31 | 17 |
| 21     | <i>T. cristatus</i>  | Male   | Strasbourg | 7.0       | 6.0 | 1.0453 | 0.5378 | 2.00 | 0.0 | 19 | 31 | 17 |
| 22     | <i>T. cristatus</i>  | Female | Strasbourg | 7.5       | 7.4 | 1.0374 | 0.5966 | 1.88 | 0.1 | 17 | 30 | 17 |
| 24     | <i>T. cristatus</i>  | Male   | Strasbourg | 7.2       | 7.0 | 1.0791 | 0.4983 | 1.81 | 0.1 | 18 | 34 | 17 |
| 25     | <i>T. cristatus</i>  | Male   | Strasbourg | 8.0       | 7.2 | 1.0827 | 0.5910 | 2.00 | 0.1 | 19 | 34 | 17 |
| 26     | <i>T. cristatus</i>  | Female | Strasbourg | 7.9       | 7.2 | 1.0791 | 0.6074 | 2.06 | 0.1 | 20 | 36 | 17 |
| 27     | <i>T. cristatus</i>  | Female | Strasbourg | 6.8       | 6.0 | 1.0293 | 0.4983 | 1.87 | 0.0 | 18 | 30 | 17 |
| 28     | <i>T. cristatus</i>  | Male   | Strasbourg | 7.5       | 6.8 | 1.0644 | 0.6020 | 1.84 | 0.1 | 17 | 25 | 17 |
| 29     | <i>T. cristatus</i>  | Female | Strasbourg | 8.0       | 6.5 | 1.0881 | 0.5378 | 1.95 | 0.1 | 16 | 30 | 17 |
| 30     | <i>T. cristatus</i>  | Male   | Strasbourg | 7.0       | 6.4 | 1.0827 | 0.6074 | 2.10 | 0.1 | 21 | 22 | 17 |
| 31     | <i>T. cristatus</i>  | Male   | Paris      | 7.2       | 7.0 | 1.0413 | 0.6020 | 2.00 | 0.2 | 16 | 32 | 17 |
| 32     | <i>T. cristatus</i>  | Female | Paris      | 6.8       | 6.0 | 1.0170 | 0.5682 | 1.95 | 0.2 | 19 | 32 | 17 |
| 33     | <i>T. cristatus</i>  | Male   | Nancy      | 8.6       | 7.6 | 1.0791 | 0.5910 | 2.00 | 0.1 | 16 | 26 | 17 |
| 34     | <i>T. cristatus</i>  | Male   | Nancy      | 8.5       | 7.0 | 1.0791 | 0.5966 | 2.00 | 0.2 | 15 | 26 | 17 |
| 35     | <i>T. cristatus</i>  | Female | Paris      | 6.7       | 6.0 | 1.0211 | 0.6020 | 2.15 | 0.2 | 19 | 31 | 17 |
| 36     | <i>T. cristatus</i>  | Male   | Paris      | 7.5       | 6.5 | 1.0413 | 0.6020 | 1.88 | 0.0 | 19 | 35 | 17 |
| 37     | <i>T. cristatus</i>  | Female | Paris      | 7.7       | 7.0 | 1.0492 | 0.6180 | 1.95 | 0.1 | 15 | 26 | 17 |
| 38     | <i>T. cristatus</i>  | Male   | Strasbourg | 9.0       | 8.4 | 1.1105 | 0.6483 | 1.95 | 0.1 | 22 | 35 | 17 |
| 39     | <i>T. cristatus</i>  | Male   | Nancy      | 8.5       | 7.8 | 1.0607 | 0.6483 | 2.10 | 0.0 | 20 | 26 | 17 |
| 40     | <i>T. cristatus</i>  | Male   | Paris      | 6.5       | 5.7 | 1.0021 | 0.5440 | 1.70 | 0.1 | 19 | 31 | 17 |



|    |                      |        |            |      |      |        |        |      |     |    |    |    |
|----|----------------------|--------|------------|------|------|--------|--------|------|-----|----|----|----|
| 41 | <i>T. cristatus</i>  | Female | Paris      | 7.0  | 6.5  | 1.0293 | 0.6020 | 1.83 | 0.0 | 19 | 31 | 17 |
| 42 | <i>T. marmoratus</i> | Female | Banyuls    | 7.4  | 6.9  | 1.1105 | 0.6946 | 2.86 | 1.0 | 31 | 43 | 15 |
| 43 | <i>T. cristatus</i>  | Female | Paris      | 6.0  | 5.2  | 1.0253 | 0.5966 | 1.90 | 0.1 | 20 | 31 | 17 |
| 44 | <i>T. cristatus</i>  | Female | Paris      | 6.8  | 6.0  | 1.0043 | 0.5502 | 2.00 | 0.0 | 15 | 31 | 17 |
| 45 | <i>T. cristatus</i>  | Female | Paris      | 8.1  | 7.3  | 1.0791 | 0.6334 | 2.10 | 0.2 | 21 | 30 | 17 |
| 46 | <i>T. cristatus</i>  | Male   | Paris      | 7.0  | 6.3  | 1.0211 | 0.5682 | 1.95 | 0.1 | 14 | 32 | 17 |
| 47 | <i>T. cristatus</i>  | Male   | Paris      | 6.8  | 6.6  | 1.0607 | 0.6074 | 1.80 | 0.0 | 16 | 27 | 17 |
| 48 | <i>T. cristatus</i>  | Female | Paris      | 6.5  | 5.7  | 1.0607 | 0.6020 | 1.78 | 0.1 | 18 | 33 | 17 |
| 49 | <i>T. cristatus</i>  | Female | Paris      | 7.0  | 6.2  | 1.0374 | 0.6483 | 2.10 | 0.1 | 19 | 31 | 17 |
| 50 | <i>T. cristatus</i>  | Male   | Paris      | 7.5  | 7.5  | 1.1020 | 0.6580 | 1.85 | 0.2 | 27 | 30 | 17 |
| 51 | <i>T. cristatus</i>  | Male   | Nancy      | 8.6  | 7.4  | 1.0718 | 0.6483 | 1.80 | 0.1 | 18 | 28 | 17 |
| 52 | <i>T. cristatus</i>  | Male   | Paris      | 6.1  | 7.0  | 1.0211 | 0.5622 | 2.16 | 0.1 | 19 | 31 | 17 |
| 53 | <i>T. cristatus</i>  | Male   | Paris      | 6.6  | 6.5  | 1.0314 | 0.5378 | 2.10 | 0.1 | 16 | 30 | 17 |
| 54 | <i>T. marmoratus</i> | Male   | Banyuls    | 10.0 | 9.0  | 1.1205 | 0.7403 | 3.10 | 0.9 | 21 | 43 | 14 |
| 55 | <i>T. marmoratus</i> | Female | Tulle      | 7.6  | 6.9  | 1.0827 | 0.6902 | 2.76 | 1.1 | 31 | 44 | 14 |
| 56 | <i>T. marmoratus</i> | Female | Banyuls    | 10.0 | 9.1  | 1.1205 | 0.7558 | 3.00 | 1.1 | 32 | 42 | 14 |
| 57 | <i>T. marmoratus</i> | Male   | Tulle      | 10.5 | 9.8  | 1.1492 | 0.7323 | 3.20 | 1.2 | 30 | 55 | 14 |
| 58 | <i>T. marmoratus</i> | Male   | Tulle      | 10.5 | 9.0  | 1.1760 | 0.7853 | 2.72 | 0.8 | 31 | 56 | 14 |
| 59 | <i>T. cristatus</i>  | Female | Strasbourg | 11.1 | 8.9  | 1.1430 | 0.6580 | 2.00 | 0.0 | 15 | 26 | 17 |
| 60 | <i>T. marmoratus</i> | Male   | Banyuls    | 10.4 | 9.7  | 1.1818 | 0.7781 | 2.95 | 1.2 | 30 | 47 | 14 |
| 61 | <i>T. marmoratus</i> | Male   | Banyuls    | 9.5  | 8.8  | 1.1303 | 0.7323 | 3.00 | 1.1 | 30 | 42 | 14 |
| 62 | <i>T. marmoratus</i> | Female | Tulle      | 8.1  | 7.7  | 1.1238 | 0.6989 | 2.77 | 1.2 | 24 | 44 | 14 |
| 63 | <i>T. marmoratus</i> | Male   | Tulle      | 10.1 | 10.1 | 1.1398 | 0.6989 | 3.00 | 1.5 | 29 | 54 | 14 |
| 64 | <i>T. marmoratus</i> | Female | Tulle      | 10.0 | 9.8  | 1.1430 | 0.7403 | 2.70 | 1.4 | 30 | 46 | 14 |
| 65 | <i>T. marmoratus</i> | Male   | Banyuls    | 7.4  | 7.0  | 1.0969 | 0.7558 | 2.80 | 1.0 | 23 | 43 | 14 |
| 66 | <i>T. marmoratus</i> | Female | Tulle      | 8.0  | 7.4  | 1.1205 | 0.7118 | 2.86 | 1.0 | 31 | 44 | 14 |
| 67 | <i>T. marmoratus</i> | Male   | Banyuls    | 9.0  | 8.1  | 1.1139 | 0.7596 | 2.92 | 1.4 | 23 | 55 | 14 |
| 68 | <i>T. marmoratus</i> | Male   | Banyuls    | 7.8  | 7.1  | 1.0791 | 0.7323 | 2.90 | 1.2 | 32 | 45 | 14 |
| 69 | <i>T. marmoratus</i> | Male   | Banyuls    | 9.8  | 9.2  | 1.1461 | 0.7075 | 2.90 | 0.8 | 32 | 45 | 14 |
| 70 | <i>T. cristatus</i>  | Female | Strasbourg | 9.2  | 8.9  | 1.1020 | 0.6483 | 2.00 | 0.1 | 22 | 33 | 17 |
| 71 | <i>T. marmoratus</i> | Male   | Banyuls    | 10.0 | 10.0 | 1.1903 | 0.8129 | 2.66 | 1.2 | 23 | 43 | 14 |
| 72 | <i>T. marmoratus</i> | Female | Banyuls    | 10.1 | 9.2  | 1.1861 | 0.7708 | 3.00 | 1.2 | 34 | 38 | 14 |
| 73 | <i>T. marmoratus</i> | Female | Banyuls    | 7.9  | 8.7  | 1.1205 | 0.6989 | 2.85 | 1.1 | 32 | 42 | 14 |
| 74 | <i>T. marmoratus</i> | Female | Banyuls    | 9.6  | 9.1  | 1.1238 | 0.6989 | 3.02 | 1.3 | 30 | 47 | 14 |
| 75 | <i>T. cristatus</i>  | Male   | Nancy      | 9.1  | 8.0  | 1.0530 | 0.6074 | 1.90 | 0.0 | 18 | 30 | 17 |
| 76 | <i>T. cristatus</i>  | Male   | Strasbourg | 8.5  | 7.8  | 1.0881 | 0.5966 | 1.89 | 0.1 | 19 | 26 | 17 |
| 77 | <i>T. cristatus</i>  | Female | Nancy      | 8.2  | 7.4  | 1.0791 | 0.6234 | 1.77 | 0.0 | 20 | 31 | 17 |
| 78 | <i>T. cristatus</i>  | Male   | Strasbourg | 8.2  | 7.5  | 1.0845 | 0.6020 | 2.00 | 0.0 | 19 | 31 | 17 |
| 79 | <i>T. cristatus</i>  | Female | Nancy      | 7.7  | 7.0  | 1.0791 | 0.6180 | 2.00 | 0.1 | 19 | 28 | 17 |
| 80 | <i>T. cristatus</i>  | Male   | Nancy      | 8.5  | 7.8  | 1.0969 | 0.5966 | 2.00 | 0.1 | 16 | 26 | 17 |
| 81 | <i>T. marmoratus</i> | Female | Banyuls    | 7.3  | 7.1  | 1.1003 | 0.7323 | 2.70 | 1.2 | 24 | 44 | 14 |
| 82 | <i>T. marmoratus</i> | Male   | Banyuls    | 8.8  | 8.1  | 1.1072 | 0.7323 | 2.90 | 0.7 | 30 | 43 | 14 |
| 83 | <i>T. cristatus</i>  | Female | Nancy      | 7.7  | 7.7  | 1.0453 | 0.5966 | 2.10 | 0.1 | 19 | 31 | 17 |
| 84 | <i>T. cristatus</i>  | Female | Nancy      | 8.0  | 7.9  | 1.0644 | 0.5966 | 2.00 | 0.1 | 19 | 26 | 17 |
| 85 | <i>T. cristatus</i>  | Female | Paris      | 7.7  | 6.7  | 1.0530 | 0.6483 | 1.85 | 0.1 | 15 | 26 | 17 |
| 86 | <i>T. cristatus</i>  | Female | Paris      | 7.5  | 6.9  | 1.0530 | 0.6483 | 1.80 | 0.1 | 21 | 30 | 17 |



|     |                      |        |            |      |      |        |        |      |     |    |    |    |
|-----|----------------------|--------|------------|------|------|--------|--------|------|-----|----|----|----|
| 87  | <i>T. cristatus</i>  | Female | Paris      | 7.5  | 6.8  | 1.0530 | 0.6580 | 1.81 | 0.0 | 22 | 31 | 17 |
| 88  | <i>T. cristatus</i>  | Female | Strasbourg | 7.6  | 6.9  | 1.0334 | 0.5051 | 1.88 | 0.0 | 20 | 31 | 17 |
| 89  | <i>T. cristatus</i>  | Female | Nancy      | 8.0  | 7.7  | 1.0718 | 0.5966 | 1.80 | 0.1 | 19 | 31 | 17 |
| 90  | <i>T. cristatus</i>  | Female | Strasbourg | 11.0 | 9.5  | 1.1367 | 0.6483 | 2.20 | 0.0 | 20 | 29 | 17 |
| 91  | <i>T. cristatus</i>  | Female | Strasbourg | 8.0  | 7.4  | 1.0791 | 0.6074 | 1.77 | 0.1 | 18 | 30 | 17 |
| 92  | <i>T. cristatus</i>  | Male   | Paris      | 9.7  | 8.0  | 1.0934 | 0.6532 | 1.90 | 0.0 | 19 | 35 | 17 |
| 93  | <i>T. cristatus</i>  | Female | Paris      | 11.0 | 9.0  | 1.1398 | 0.6483 | 2.33 | 0.1 | 19 | 31 | 17 |
| 94  | <i>T. marmoratus</i> | Female | Banyuls    | 9.7  | 9.0  | 1.1553 | 0.7923 | 2.85 | 1.1 | 37 | 44 | 14 |
| 95  | <i>T. cristatus</i>  | Male   | Paris      | 8.0  | 7.0  | 1.1105 | 0.6434 | 2.22 | 0.1 | 18 | 29 | 17 |
| 96  | <i>T. cristatus</i>  | Female | Paris      | 11.0 | 10.0 | 1.1731 | 0.6989 | 1.90 | 0.0 | 29 | 48 | 17 |
| 97  | <i>T. cristatus</i>  | Female | Paris      | 11.0 | 9.2  | 1.1461 | 0.6721 | 1.81 | 0.1 | 19 | 31 | 17 |
| 98  | <i>T. cristatus</i>  | Female | Paris      | 7.7  | 6.7  | 1.1072 | 0.6627 | 2.25 | 0.2 | 22 | 32 | 17 |
| 99  | <i>T. cristatus</i>  | Female | Paris      | 7.9  | 7.0  | 1.0791 | 0.6483 | 1.72 | 0.0 | 19 | 31 | 17 |
| 100 | <i>T. cristatus</i>  | Female | Paris      | 7.9  | 7.8  | 1.1020 | 0.6283 | 1.89 | 0.0 | 15 | 30 | 17 |
| 101 | <i>T. cristatus</i>  | Male   | Paris      | 7.9  | 7.1  | 1.0863 | 0.5910 | 2.22 | 0.1 | 17 | 32 | 18 |
| 102 | <i>T. cristatus</i>  | Male   | Paris      | 8.0  | 7.0  | 1.0530 | 0.6127 | 1.96 | 0.0 | 21 | 32 | 17 |
| 103 | Hybrid               | Male   | Mayenne    | 11.0 | 9.7  | 1.1430 | 0.6020 | 2.32 | 1.6 | 26 | 44 | 14 |
| 104 | Hybrid               | Female | Mayenne    | 10.2 | 9.7  | 1.2014 | 0.7745 | 2.11 | 1.1 | NA | NA | 16 |
| 105 | Hybrid               | Male   | Mayenne    | 8.4  | 7.3  | 1.0791 | 0.7118 | 3.33 | 0.0 | 24 | 38 | 16 |
| 106 | Hybrid               | Female | Mayenne    | 10.2 | 9.3  | 1.1717 | 0.7242 | 3.00 | 1.4 | 39 | 49 | 17 |
| 107 | Hybrid               | Female | Mayenne    | 10.1 | 9.9  | 1.1789 | 0.6946 | 2.34 | 0.1 | 33 | 64 | 15 |
| 108 | Hybrid               | Female | Mayenne    | 9.7  | 8.9  | 1.1522 | 0.6812 | 4.00 | 0.0 | 34 | 44 | 16 |
| 109 | Hybrid               | Male   | Mayenne    | 8.9  | 8.2  | 1.0755 | 0.6127 | 2.55 | 1.4 | 18 | 38 | 16 |
| 112 | Hybrid               | Female | Mayenne    | 10.1 | 9.0  | 1.1335 | 0.7364 | 2.80 | 1.0 | 34 | 45 | 16 |
| 113 | Hybrid               | Female | Mayenne    | 7.9  | 7.9  | 1.0827 | 0.7323 | 3.35 | 0.0 | 24 | 38 | 16 |
| 114 | Hybrid               | Female | Mayenne    | 9.0  | 7.4  | 1.1105 | 0.6283 | 2.00 | 0.2 | 21 | 37 | 16 |
| 115 | Hybrid               | Female | Mayenne    | 10.1 | 9.1  | 1.1789 | 0.6812 | 1.91 | 0.3 | 28 | 50 | 15 |
| 116 | <i>T. marmoratus</i> | Male   | Mayenne    | 7.5  | 6.8  | 1.1398 | 0.7160 | 3.20 | 1.0 | 26 | 48 | 15 |
| 117 | <i>T. marmoratus</i> | Female | Tulle      | 10.0 | 9.5  | 1.1492 | 0.7781 | 3.00 | 1.7 | 30 | 50 | 14 |
| 118 | <i>T. marmoratus</i> | Male   | Mayenne    | 8.4  | 6.7  | 1.0530 | 0.6989 | 2.00 | 0.7 | 24 | 34 | 14 |
| 119 | Hybrid               | Female | Mayenne    | 10.0 | 8.0  | 1.1398 | 0.7481 | 2.80 | 1.1 | 24 | 46 | 16 |
| 120 | <i>T. marmoratus</i> | Male   | Mayenne    | 7.9  | 7.8  | 1.1398 | 0.6812 | 2.37 | 1.1 | 28 | 42 | 14 |
| 121 | <i>T. marmoratus</i> | Female | Tulle      | 7.7  | 7.2  | 1.0827 | 0.7201 | 2.81 | 1.1 | 29 | 42 | 14 |
| 122 | <i>T. marmoratus</i> | Female | Tulle      | 10.8 | 10.5 | 1.1492 | 0.7403 | 2.80 | 1.1 | 36 | 45 | 14 |
| 123 | <i>T. marmoratus</i> | Female | Mayenne    | 11.5 | 10.4 | 1.1818 | 0.8061 | 2.74 | 1.1 | 34 | 36 | 14 |
| 124 | <i>T. marmoratus</i> | Female | Tulle      | 10.0 | 9.2  | 1.1303 | 0.7781 | 2.86 | 1.0 | 30 | 48 | 14 |
| 125 | Hybrid               | Male   | Mayenne    | 9.5  | 9.0  | 1.1492 | 0.7481 | 2.00 | 1.7 | 26 | 44 | 16 |
| 126 | <i>T. marmoratus</i> | Male   | Tulle      | 7.3  | 7.0  | 1.0755 | 0.7708 | 2.80 | 0.9 | 30 | 52 | 14 |
| 127 | <i>T. marmoratus</i> | Male   | Tulle      | 9.1  | 8.8  | 1.1303 | 0.6627 | 2.90 | 1.0 | 28 | 51 | 15 |
| 128 | <i>T. cristatus</i>  | Male   | Mayenne    | 8.1  | 7.3  | 1.0791 | 0.5682 | 2.00 | 0.2 | 13 | 32 | 17 |
| 129 | <i>T. marmoratus</i> | Male   | Tulle      | 8.7  | 8.1  | 1.1139 | 0.6902 | 3.00 | 1.0 | 30 | 46 | 14 |
| 130 | <i>T. marmoratus</i> | Male   | Tulle      | 8.7  | 9.5  | 1.1303 | 0.6857 | 2.70 | 1.2 | 28 | 52 | 14 |
| 131 | <i>T. marmoratus</i> | Female | Mayenne    | 10.9 | 10.3 | 1.1846 | 0.8260 | 2.35 | 0.3 | 29 | 64 | 15 |
| 132 | <i>T. marmoratus</i> | Male   | Tulle      | 8.0  | 8.5  | 1.1461 | 0.6989 | 2.70 | 1.0 | 26 | 47 | 14 |
| 133 | <i>T. cristatus</i>  | Female | Mayenne    | 7.9  | 7.3  | 1.1335 | 0.5966 | 2.12 | 0.0 | 24 | 32 | 17 |
| 134 | <i>T. marmoratus</i> | Male   | Tulle      | 7.8  | 7.6  | 1.1003 | 0.7403 | 2.90 | 1.0 | 31 | 48 | 15 |



|     |                      |        |         |      |      |        |        |      |     |    |    |    |
|-----|----------------------|--------|---------|------|------|--------|--------|------|-----|----|----|----|
| 135 | <i>T. marmoratus</i> | Female | Tulle   | 10.0 | 9.8  | 1.1583 | 0.7923 | 2.51 | 1.4 | 31 | 50 | 14 |
| 136 | <i>T. marmoratus</i> | Male   | Tulle   | 9.0  | 8.2  | 1.1760 | 0.7817 | 2.86 | 1.1 | 22 | 45 | 14 |
| 137 | <i>T. marmoratus</i> | Female | Mayenne | 9.1  | 8.1  | 1.1613 | 0.7958 | 2.77 | 1.2 | 26 | 23 | 14 |
| 138 | Hybrid               | Male   | Mayenne | 10.5 | 10.0 | 1.1492 | 0.6483 | 2.30 | 0.4 | 28 | 53 | 16 |
| 139 | Hybrid               | Male   | Mayenne | 8.5  | 7.5  | 1.0413 | 0.6627 | 2.00 | 1.5 | 26 | 41 | 16 |
| 140 | <i>T. marmoratus</i> | Female | Tulle   | 9.1  | 9.0  | 1.1105 | 0.7201 | 2.72 | 1.1 | 27 | 46 | 14 |
| 141 | <i>T. cristatus</i>  | Male   | Paris   | 9.1  | 8.2  | 1.1398 | 0.6532 | 2.20 | 0.0 | 18 | 42 | 17 |
| 142 | <i>T. marmoratus</i> | Female | Tulle   | 10.0 | 9.1  | 1.1461 | 0.7283 | 3.04 | 1.2 | 29 | 50 | 14 |
| 143 | <i>T. marmoratus</i> | Male   | Mayenne | 8.1  | 7.8  | 1.1072 | 0.6902 | 2.86 | 1.1 | 28 | 48 | 14 |
| 144 | Hybrid               | Male   | Mayenne | 11.1 | 10.0 | 1.1303 | 0.7403 | 1.94 | 0.1 | 26 | 50 | 14 |
| 145 | <i>T. marmoratus</i> | Female | Tulle   | 10.6 | 10.0 | 1.1903 | 0.8095 | 3.30 | 1.6 | 32 | 53 | 14 |
| 146 | <i>T. marmoratus</i> | Female | Tulle   | 10.0 | 9.1  | 1.1538 | 0.7558 | 3.20 | 1.5 | 32 | 52 | 14 |
| 147 | <i>T. cristatus</i>  | Female | Paris   | 9.1  | 9.0  | 1.1522 | 0.6902 | 1.80 | 0.0 | 25 | 32 | 17 |
| 148 | <i>T. cristatus</i>  | Female | Mayenne | 8.0  | 6.5  | 1.0934 | 0.5966 | 2.42 | 0.0 | 22 | 30 | 17 |
| 149 | <i>T. cristatus</i>  | Female | Mayenne | 8.7  | 8.1  | 1.1105 | 0.6180 | 1.57 | 0.0 | 23 | 44 | 17 |
| 150 | <i>T. cristatus</i>  | Female | Mayenne | 6.9  | 6.9  | 1.1638 | 0.6127 | 1.80 | 0.0 | 21 | 37 | 17 |
| 151 | <i>T. marmoratus</i> | Female | Mayenne | 10.7 | 9.8  | 1.1398 | 0.7993 | 2.66 | 0.9 | 28 | 52 | 14 |
| 152 | <i>T. cristatus</i>  | Female | Mayenne | 8.1  | 7.9  | 1.1271 | 0.6020 | 1.88 | 0.0 | 21 | 37 | 17 |
| 153 | <i>T. cristatus</i>  | Female | Mayenne | 7.5  | 5.8  | 1.0791 | 0.5910 | 2.05 | 0.0 | 24 | 32 | 17 |
| 154 | <i>T. cristatus</i>  | Female | Mayenne | 10.2 | 8.7  | 1.2304 | 0.6989 | 1.80 | 1.1 | 24 | 36 | 17 |
| 156 | <i>T. cristatus</i>  | Female | Mayenne | 8.7  | 7.4  | 1.1931 | 0.5682 | 2.14 | 0.1 | 20 | 36 | 17 |
| 157 | <i>T. cristatus</i>  | Male   | Mayenne | 8.5  | 7.1  | 1.1139 | 0.6020 | 2.22 | 0.0 | 26 | 40 | 17 |
| 158 | <i>T. cristatus</i>  | Male   | Mayenne | 8.1  | 7.0  | 1.1205 | 0.6384 | 2.00 | 0.0 | 28 | 40 | 17 |
| 159 | <i>T. marmoratus</i> | Male   | Mayenne | 9.3  | 9.1  | 1.1105 | 0.7403 | 2.76 | 1.3 | 24 | 41 | 14 |
| 160 | <i>T. marmoratus</i> | Female | Mayenne | 9.1  | 8.1  | 1.1731 | 0.7323 | 3.10 | 0.9 | 34 | 40 | 15 |
| 161 | <i>T. cristatus</i>  | Male   | Mayenne | 8.1  | 7.1  | 1.0881 | 0.5563 | 1.88 | 0.1 | 24 | 45 | 17 |
| 162 | <i>T. cristatus</i>  | Male   | Mayenne | 8.1  | 8.0  | 1.0934 | 0.5966 | 1.94 | 0.0 | 18 | 35 | 17 |
| 163 | Hybrid               | Male   | Mayenne | 10.0 | 8.1  | 1.1020 | 0.7708 | 2.25 | 0.0 | 26 | 48 | 15 |
| 164 | Hybrid               | Female | Mayenne | 8.9  | 7.8  | 1.1492 | 0.7993 | 3.35 | 1.4 | 24 | 40 | 17 |
| 165 | <i>T. cristatus</i>  | Female | Mayenne | 7.5  | 7.0  | 1.1003 | 0.5502 | 2.12 | 0.0 | 18 | 43 | 17 |
| 166 | Hybrid               | Female | Mayenne | 9.9  | 10.0 | 1.1492 | 0.7745 | 2.00 | 0.6 | 30 | 50 | 15 |
| 167 | <i>T. cristatus</i>  | Female | Mayenne | 8.1  | 7.5  | 1.1139 | 0.6232 | 1.83 | 0.2 | 23 | 31 | 18 |
| 168 | <i>T. cristatus</i>  | Female | Mayenne | 7.5  | 7.4  | 1.0969 | 0.7481 | 2.05 | 0.2 | 22 | 43 | 17 |
| 169 | <i>T. cristatus</i>  | Male   | Mayenne | 9.2  | 8.5  | 1.1003 | 0.6283 | 1.88 | 0.1 | 20 | 38 | 17 |
| 170 | <i>T. cristatus</i>  | Male   | Mayenne | 7.9  | 7.5  | 1.0899 | 0.6180 | 2.40 | 0.0 | 18 | 32 | 17 |
| 171 | <i>T. marmoratus</i> | Male   | Mayenne | 9.3  | 8.7  | 1.1205 | 0.6989 | 3.00 | 1.0 | 22 | 40 | 14 |
| 172 | <i>T. marmoratus</i> | Female | Mayenne | 9.6  | 9.3  | 1.1522 | 0.7364 | 3.10 | 1.7 | 31 | 46 | 13 |
| 173 | <i>T. marmoratus</i> | Female | Mayenne | 8.5  | 8.1  | 1.1398 | 0.6989 | 3.00 | 0.6 | 24 | 37 | 14 |
| 174 | <i>T. marmoratus</i> | Female | Mayenne | 8.5  | 8.4  | 1.1553 | 0.8095 | 2.75 | 1.2 | 25 | 52 | 14 |
| 175 | <i>T. marmoratus</i> | Female | Mayenne | 10.2 | 9.4  | 1.1613 | 0.6989 | 3.00 | 1.2 | 28 | 47 | 14 |
| 176 | <i>T. cristatus</i>  | Male   | Mayenne | 9.4  | 8.1  | 1.0791 | 0.6483 | 1.88 | 0.1 | 22 | 36 | 17 |
| 177 | <i>T. cristatus</i>  | Male   | Mayenne | 9.3  | 8.6  | 1.1205 | 0.5622 | 2.00 | 0.1 | 19 | 44 | 18 |
| 178 | <i>T. cristatus</i>  | Male   | Mayenne | 7.7  | 6.1  | 1.0530 | 0.5502 | 2.00 | 0.0 | 22 | 38 | 17 |
| 179 | <i>T. marmoratus</i> | Female | Mayenne | 10.6 | 10.6 | 1.2068 | 0.8061 | 3.15 | 1.0 | 32 | 48 | 14 |
| 180 | <i>T. cristatus</i>  | Male   | Mayenne | 8.1  | 8.0  | 1.1271 | 0.6127 | 1.93 | 0.1 | 28 | 40 | 18 |
| 181 | <i>T. marmoratus</i> | Male   | Mayenne | 8.6  | 8.3  | 1.1038 | 0.6627 | 2.80 | 1.6 | 24 | 49 | 14 |



|     |                      |        |         |      |      |        |        |      |     |    |    |    |
|-----|----------------------|--------|---------|------|------|--------|--------|------|-----|----|----|----|
| 182 | <i>T. marmoratus</i> | Male   | Mayenne | 9.6  | 9.4  | 1.1731 | 0.7118 | 3.30 | 0.8 | 30 | 40 | 14 |
| 183 | <i>T. cristatus</i>  | Male   | Mayenne | 7.9  | 7.5  | 1.0791 | 0.5502 | 2.00 | 0.1 | 24 | 46 | 17 |
| 184 | <i>T. cristatus</i>  | Female | Mayenne | 9.0  | 7.8  | 1.1303 | 0.6232 | 2.07 | 0.6 | 22 | 48 | 17 |
| 185 | <i>T. cristatus</i>  | Female | Mayenne | 6.9  | 6.0  | 1.0791 | 0.5910 | 1.80 | 0.0 | 20 | 45 | 17 |
| 186 | <i>T. cristatus</i>  | Female | Mayenne | 9.1  | 8.0  | 1.1139 | 0.6127 | 2.33 | 0.2 | 21 | 36 | 17 |
| 187 | <i>T. cristatus</i>  | Female | Mayenne | 6.7  | 5.0  | 0.9420 | 0.5740 | 1.47 | 0.0 | 18 | 30 | 17 |
| 188 | <i>T. marmoratus</i> | Male   | Mayenne | 7.8  | 7.5  | 1.0718 | 0.6283 | 2.77 | 1.1 | 24 | 38 | 15 |
| 189 | <i>T. marmoratus</i> | Female | Mayenne | 7.9  | 7.3  | 1.0827 | 0.6989 | 2.86 | 0.7 | 21 | 23 | 15 |
| 191 | <i>T. marmoratus</i> | Male   | Mayenne | 9.6  | 9.0  | 1.0899 | 0.7403 | 2.20 | 1.4 | 28 | 46 | 15 |
| 192 | Hybrid               | Female | Mayenne | 8.2  | 7.7  | 1.0934 | 0.6946 | 2.00 | 0.6 | 22 | 42 | 15 |
| 193 | <i>T. marmoratus</i> | Male   | Mayenne | 10.1 | 9.0  | 1.1303 | 0.6946 | 3.00 | 1.8 | 24 | 52 | 14 |
| 194 | Hybrid               | Male   | Mayenne | 8.4  | 8.1  | 1.1172 | 0.6946 | 2.30 | 0.0 | 24 | 44 | 14 |
| 196 | Hybrid               | Female | Mayenne | 9.1  | 8.7  | 1.1122 | 0.6989 | 2.24 | 1.7 | 26 | 47 | 14 |
| 197 | Hybrid               | Female | Mayenne | 10.9 | 9.7  | 1.2095 | 0.7708 | 2.16 | 0.1 | 30 | 48 | 16 |
| 198 | Hybrid               | Female | Mayenne | 9.4  | 8.2  | 1.1172 | 0.6989 | 2.34 | 1.2 | 36 | 47 | 15 |
| 199 | Hybrid               | Female | Mayenne | 9.3  | 9.0  | 1.1303 | 0.7708 | 3.33 | 0.0 | 24 | 46 | 16 |
| 200 | Hybrid               | Female | Mayenne | 9.1  | 8.9  | 1.1303 | 0.7596 | 2.00 | 1.2 | 32 | 42 | 16 |
| 201 | <i>T. cristatus</i>  | Male   | Mayenne | 7.6  | 7.1  | 1.0625 | 0.4983 | 1.84 | 0.1 | 20 | 30 | 17 |
| 202 | <i>T. cristatus</i>  | Female | Mayenne | 8.0  | 6.3  | 1.0934 | 0.6627 | 2.20 | 0.0 | 20 | 33 | 17 |
| 203 | <i>T. cristatus</i>  | Male   | Mayenne | 7.7  | 7.1  | 1.0863 | 0.5966 | 2.28 | 0.1 | 20 | 34 | 17 |
| 205 | <i>T. cristatus</i>  | Male   | Mayenne | 8.6  | 7.5  | 1.1303 | 0.5378 | 2.50 | 0.2 | 24 | 38 | 17 |
| 206 | Hybrid               | Female | Mayenne | 8.4  | 8.2  | 1.1172 | 0.6902 | 2.85 | 0.0 | 26 | 38 | 16 |
| 207 | Hybrid               | Female | Mayenne | 9.5  | 9.5  | 1.1430 | 0.6902 | 2.10 | 0.0 | 28 | 50 | 16 |
| 208 | <i>T. marmoratus</i> | Female | Mayenne | 8.7  | 8.2  | 1.1205 | 0.7442 | 2.85 | 1.0 | 22 | 32 | 14 |
| 209 | <i>T. marmoratus</i> | Male   | Mayenne | 7.4  | 7.3  | 1.0969 | 0.6334 | 2.40 | 1.0 | 22 | 44 | 14 |
| 210 | <i>T. cristatus</i>  | Male   | Mayenne | 8.1  | 7.2  | 1.1105 | 0.6434 | 2.00 | 0.0 | 19 | 32 | 17 |
| 211 | <i>T. cristatus</i>  | Male   | Mayenne | 8.4  | 8.4  | 1.1303 | 0.6483 | 2.08 | 0.0 | 18 | 38 | 17 |
| 212 | <i>T. marmoratus</i> | Female | Mayenne | 10.9 | 9.8  | 1.1613 | 0.7781 | 3.00 | 0.8 | 27 | 45 | 14 |
| 213 | <i>T. marmoratus</i> | Male   | Mayenne | 10.8 | 9.6  | 1.1789 | 0.7403 | 3.00 | 1.1 | 29 | 40 | 14 |
| 214 | <i>T. marmoratus</i> | Female | Mayenne | 10.0 | 9.0  | 1.1553 | 0.8129 | 2.70 | 0.8 | 30 | 56 | 14 |
| 215 | <i>T. cristatus</i>  | Male   | Mayenne | 9.2  | 8.2  | 1.1139 | 0.6074 | 2.00 | 0.1 | 17 | 42 | 17 |
| 217 | <i>T. cristatus</i>  | Female | Mayenne | 8.9  | 8.1  | 1.0969 | 0.5966 | 1.94 | 0.0 | 18 | 27 | 17 |
| 219 | Hybrid               | Female | Mayenne | 10.1 | 10.1 | 1.2174 | 0.7745 | 3.50 | 1.2 | 32 | 52 | 17 |
| 220 | Hybrid               | Female | Mayenne | 8.3  | 8.2  | 1.1020 | 0.7032 | 2.00 | 0.0 | 19 | 32 | 14 |
| 221 | Hybrid               | Female | Mayenne | 10.3 | 9.8  | 1.1522 | 0.7708 | 2.40 | 0.0 | 28 | 42 | 16 |
| 222 | Hybrid               | Male   | Mayenne | 6.3  | 6.0  | 0.9956 | 0.6627 | NA   | NA  | 16 | 28 | 16 |
| 223 | Hybrid               | Female | Mayenne | 10.1 | 9.9  | 1.1673 | 0.7118 | 2.50 | 0.1 | 38 | 58 | 16 |
| 224 | Hybrid               | Female | Mayenne | 10.0 | 8.7  | 1.1673 | 0.7201 | 2.70 | 0.1 | 32 | 56 | 15 |
| 225 | Hybrid               | Female | Mayenne | 7.3  | 7.8  | 1.0934 | 0.7160 | 1.80 | 0.1 | 21 | 57 | 16 |
| 226 | Hybrid               | Male   | Mayenne | 7.8  | 7.4  | 1.0413 | 0.6483 | 1.33 | 0.8 | 18 | 36 | 15 |
| 228 | <i>T. marmoratus</i> | Female | Tulle   | 9.5  | 9.0  | 1.1205 | 0.7481 | 2.65 | 1.0 | 32 | 49 | 14 |
| 229 | <i>T. marmoratus</i> | Male   | Mayenne | 8.0  | 7.2  | 1.0934 | 0.6989 | 2.60 | 1.0 | 22 | 44 | 15 |
| 230 | <i>T. cristatus</i>  | Female | Mayenne | 9.0  | 7.5  | 1.0863 | 0.6020 | 2.11 | 0.0 | 20 | 40 | 17 |
| 231 | <i>T. marmoratus</i> | Female | Mayenne | 10.8 | 8.7  | 1.2253 | 0.7403 | 3.50 | 1.1 | 30 | 45 | 15 |
| 232 | <i>T. marmoratus</i> | Male   | Mayenne | 8.1  | 7.5  | 1.0934 | 0.7993 | 1.55 | 0.9 | 31 | 40 | 14 |
| 233 | <i>T. cristatus</i>  | Male   | Mayenne | 8.4  | 7.2  | 1.1003 | 0.5797 | 1.87 | 0.2 | 19 | 38 | 17 |



|     |                      |        |         |      |      |        |        |      |     |    |    |    |
|-----|----------------------|--------|---------|------|------|--------|--------|------|-----|----|----|----|
| 234 | <i>T. marmoratus</i> | Male   | Mayenne | 8.4  | 7.5  | 1.0934 | 0.6283 | 2.45 | 1.2 | 28 | 50 | 14 |
| 235 | <i>T. cristatus</i>  | Male   | Mayenne | 8.1  | 7.3  | 1.1038 | 0.6434 | 2.15 | 0.2 | 20 | 34 | 17 |
| 236 | <i>T. marmoratus</i> | Female | Mayenne | 10.2 | 9.0  | 1.1367 | 0.7283 | 2.71 | 0.1 | 31 | 58 | 14 |
| 237 | Hybrid               | Female | Mayenne | 10.0 | 9.0  | 1.1702 | 0.7481 | 2.14 | 0.1 | 25 | 48 | 16 |
| 238 | Hybrid               | Female | Mayenne | 11.2 | 10.5 | 1.2148 | 0.7708 | 2.55 | 0.1 | 36 | 56 | 17 |
| 239 | Hybrid               | Female | Mayenne | 11.1 | 11.0 | 1.2304 | 0.7817 | 3.20 | 1.4 | 39 | 48 | 16 |
| 240 | Hybrid               | Female | Mayenne | 10.3 | 9.4  | 1.1931 | 0.7993 | 2.50 | 0.7 | 32 | 56 | 16 |
| 241 | Hybrid               | Female | Mayenne | 8.5  | 7.4  | 1.0827 | 0.7032 | 2.80 | 1.4 | 29 | 49 | 15 |
| 242 | Hybrid               | Male   | Mayenne | 10.0 | 9.1  | 1.1702 | 0.7708 | 2.00 | 0.2 | 29 | 50 | 16 |
| 243 | Hybrid               | Female | Mayenne | 8.0  | 8.0  | 1.1303 | 0.6989 | 2.00 | 0.0 | 22 | 40 | 16 |
| 244 | Hybrid               | Male   | Mayenne | 10.0 | 8.8  | 1.1789 | 0.7032 | 2.34 | 0.9 | 26 | 42 | 16 |
| 245 | Hybrid               | Female | Mayenne | 10.0 | 9.8  | 1.1702 | 0.7075 | 1.84 | 1.4 | 30 | 47 | 16 |
| 246 | Hybrid               | Male   | Mayenne | 10.1 | 9.9  | 1.1789 | 0.6721 | 3.00 | 1.2 | 18 | 44 | 16 |
| 247 | Hybrid               | Male   | Mayenne | 9.3  | 8.4  | 1.1702 | 0.7923 | 2.60 | 1.1 | 24 | 52 | 16 |
| 248 | Hybrid               | Female | Mayenne | 8.4  | 8.4  | 1.0827 | 0.7118 | 3.50 | 0.0 | 23 | 42 | 16 |
| 249 | Hybrid               | Male   | Mayenne | 8.4  | 6.8  | 1.0969 | 0.7160 | 3.64 | 0.6 | 28 | 48 | 16 |
| 250 | Hybrid               | Male   | Mayenne | 8.5  | 8.0  | 1.0755 | 0.6721 | 2.08 | 0.0 | 17 | 34 | 16 |
| 251 | Hybrid               | Male   | Mayenne | 9.6  | 8.3  | 1.1335 | 0.6483 | 3.25 | 1.1 | 28 | 55 | 16 |
| 252 | Hybrid               | Female | Mayenne | 10.3 | 9.3  | 1.1903 | 0.7708 | 2.29 | 0.0 | 29 | 56 | 16 |
| 253 | Hybrid               | Female | Mayenne | 11.0 | 9.0  | 1.1717 | 0.7201 | 2.86 | 0.5 | NA | NA | 16 |
| 254 | Hybrid               | Female | Mayenne | 10.4 | 9.9  | 1.1643 | 0.7160 | 1.88 | 1.5 | 30 | 39 | 16 |
| 255 | Hybrid               | Female | Mayenne | 9.0  | 7.2  | 1.1553 | 0.6483 | 2.55 | 1.5 | 26 | 48 | 16 |
| 256 | Hybrid               | Female | Mayenne | 8.4  | 7.5  | 1.1222 | 0.7364 | 2.40 | 0.0 | NA | NA | 16 |
| 257 | <i>T. marmoratus</i> | Male   | Mayenne | 9.9  | 9.3  | 1.1731 | 0.8325 | 3.74 | 1.3 | 24 | 34 | 14 |
| 258 | Hybrid               | Male   | Mayenne | 10.0 | 8.0  | 1.1613 | 0.7481 | 2.85 | 0.7 | 26 | 46 | 16 |
| 259 | Hybrid               | Female | Mayenne | 7.3  | 7.3  | 1.1122 | 0.6946 | 2.00 | 0.1 | 20 | 36 | 16 |
| 260 | Hybrid               | Male   | Mayenne | 9.0  | 7.8  | 1.1303 | 0.7118 | 3.45 | 1.4 | 26 | 42 | 16 |
| 261 | Hybrid               | Female | Mayenne | 10.6 | 9.8  | 1.2068 | 0.7888 | 1.28 | 0.0 | 37 | 47 | 16 |
| 262 | Hybrid               | Female | Mayenne | 10.0 | 10.1 | 1.1303 | 0.7853 | 1.64 | 0.0 | 24 | 42 | 16 |
| 263 | <i>T. cristatus</i>  | Female | Mayenne | 8.3  | 7.4  | 1.1139 | 0.6020 | 2.42 | 0.1 | 22 | 36 | 17 |
| 264 | <i>T. cristatus</i>  | Male   | Mayenne | 8.5  | 7.1  | 1.1072 | 0.6232 | 2.33 | 0.0 | 26 | 38 | 17 |
| 265 | <i>T. cristatus</i>  | Female | Mayenne | 9.0  | 8.2  | 1.1492 | 0.6232 | 2.07 | 0.1 | 18 | 34 | 17 |
| 266 | <i>T. cristatus</i>  | Female | Mayenne | 9.0  | 8.0  | 1.0863 | 0.6989 | 1.86 | 0.3 | 24 | 42 | 17 |
| 267 | <i>T. cristatus</i>  | Female | Mayenne | 8.4  | 6.6  | 1.1398 | 0.5682 | 2.11 | 1.4 | 19 | 36 | 17 |
| 269 | <i>T. cristatus</i>  | Female | Mayenne | 7.0  | 6.0  | 1.0413 | 0.6946 | 1.81 | 0.0 | 17 | 33 | 18 |
| 271 | <i>T. marmoratus</i> | Male   | Mayenne | 11.4 | 10.4 | 1.1430 | 0.7323 | 3.00 | 1.3 | 31 | 51 | 14 |
| 272 | <i>T. marmoratus</i> | Female | Mayenne | 11.1 | 9.5  | 1.1398 | 0.7118 | 3.00 | 1.2 | 27 | 38 | 14 |
| 273 | Hybrid               | Female | Mayenne | 9.0  | 8.0  | 1.1122 | 0.6857 | 1.18 | 0.8 | 28 | 32 | 15 |
| 280 | <i>T. cristatus</i>  | Male   | Mayenne | 9.4  | 8.6  | 1.1038 | 0.5910 | 1.87 | 0.1 | 24 | 34 | 17 |
| 281 | <i>T. cristatus</i>  | Female | Mayenne | 8.9  | 8.0  | 1.1105 | 0.6434 | 1.33 | 0.7 | 18 | 30 | 17 |
| 282 | <i>T. cristatus</i>  | Male   | Mayenne | 7.4  | 6.4  | 1.0791 | 0.5118 | 1.90 | 0.0 | 18 | 34 | 17 |
| 283 | <i>T. cristatus</i>  | Female | Mayenne | 7.9  | 6.2  | 1.0791 | 0.6074 | 2.00 | 0.0 | 19 | 42 | 17 |
| 284 | <i>T. cristatus</i>  | Male   | Mayenne | 7.5  | 6.6  | 1.0413 | 0.5378 | 2.00 | 0.1 | 16 | 30 | 17 |
| 286 | <i>T. cristatus</i>  | Female | Mayenne | 9.1  | 8.7  | 1.1702 | 0.5502 | 2.36 | 0.0 | 26 | 48 | 17 |
| 288 | <i>T. cristatus</i>  | Female | Mayenne | 9.0  | 8.0  | 1.1702 | 0.6627 | 2.11 | 0.0 | 24 | 36 | 17 |
| 289 | <i>T. marmoratus</i> | Female | Mayenne | 10.6 | 9.1  | 1.1731 | 0.7745 | 2.85 | 1.4 | 27 | 46 | 15 |



|     |                      |        |         |      |      |        |        |      |     |    |    |    |
|-----|----------------------|--------|---------|------|------|--------|--------|------|-----|----|----|----|
| 290 | <i>T. cristatus</i>  | Female | Mayenne | 8.1  | 8.0  | 1.0718 | 0.6902 | 1.64 | 0.0 | 26 | 32 | 17 |
| 291 | <i>T. cristatus</i>  | Male   | Mayenne | 9.9  | 8.9  | 1.1238 | 0.6902 | 1.47 | 0.2 | 21 | 34 | 17 |
| 292 | <i>T. marmoratus</i> | Male   | Mayenne | 9.0  | 8.4  | 1.1430 | 0.6483 | 2.45 | 1.0 | 21 | 44 | 14 |
| 294 | <i>T. cristatus</i>  | Female | Mayenne | 7.8  | 6.9  | 1.1271 | 0.5118 | 2.15 | 0.2 | 24 | 36 | 17 |
| 295 | <i>T. cristatus</i>  | Female | Mayenne | 8.1  | 8.0  | 1.1238 | 0.6127 | 1.88 | 0.0 | 26 | 30 | 17 |
| 296 | <i>T. marmoratus</i> | Female | Mayenne | 11.4 | 11.1 | 1.2304 | 0.7558 | 3.30 | 1.2 | 36 | 56 | 15 |
| 297 | <i>T. cristatus</i>  | Female | Mayenne | 7.8  | 7.0  | 1.0607 | 0.5502 | 2.50 | 0.0 | 18 | 44 | 17 |
| 298 | <i>T. cristatus</i>  | Female | Mayenne | 9.9  | 8.9  | 1.1731 | 0.6902 | 1.98 | 1.0 | 25 | 34 | 17 |
| 299 | <i>T. marmoratus</i> | Male   | Mayenne | 9.6  | 9.1  | 1.1613 | 0.7745 | 2.60 | 0.7 | 24 | 46 | 14 |
| 300 | <i>T. marmoratus</i> | Female | Mayenne | 9.6  | 9.0  | 1.1613 | 0.6857 | 2.65 | 0.2 | 30 | 54 | 14 |
| 301 | <i>T. cristatus</i>  | Male   | Mayenne | 8.1  | 8.9  | 1.0755 | 0.6902 | 2.00 | 0.0 | 24 | 46 | 17 |
| 302 | <i>T. cristatus</i>  | Female | Mayenne | 8.1  | 6.9  | 1.0791 | 0.6020 | 1.93 | 0.0 | 24 | 34 | 17 |
| 303 | <i>T. cristatus</i>  | Female | Mayenne | 8.7  | 7.5  | 1.1398 | 0.6434 | 2.08 | 0.0 | 19 | 47 | 17 |
| 304 | <i>T. cristatus</i>  | Male   | Mayenne | 7.0  | 7.0  | 1.0607 | 0.6384 | 2.00 | 0.2 | 20 | 32 | 17 |
| 305 | <i>T. cristatus</i>  | Female | Mayenne | 8.1  | 7.9  | 1.1038 | 0.6434 | 1.95 | 0.1 | 19 | 38 | 17 |
| 306 | <i>T. marmoratus</i> | Female | Mayenne | 9.5  | 8.7  | 1.1553 | 0.7442 | 2.89 | 0.9 | 32 | 55 | 14 |
| 307 | <i>T. marmoratus</i> | Female | Mayenne | 10.8 | 10.2 | 1.2479 | 0.8976 | 3.11 | 1.5 | 36 | 62 | 14 |
| 308 | <i>T. marmoratus</i> | Female | Mayenne | 11.0 | 10.0 | 1.1398 | 0.7781 | 2.70 | 1.1 | 32 | 54 | 14 |
| 309 | <i>T. cristatus</i>  | Male   | Mayenne | 10.0 | 8.5  | 1.1367 | 0.6532 | 2.25 | 0.0 | 24 | 38 | 17 |
| 310 | <i>T. cristatus</i>  | Male   | Mayenne | 10.0 | 8.6  | 1.1303 | 0.5502 | 2.18 | 0.1 | 24 | 37 | 17 |
| 311 | <i>T. cristatus</i>  | Female | Mayenne | 8.1  | 6.8  | 1.1172 | 0.6020 | 1.88 | 0.0 | 23 | 38 | 17 |
| 312 | <i>T. cristatus</i>  | Female | Mayenne | 9.0  | 9.3  | 1.0881 | 0.5682 | 2.08 | 0.1 | 24 | 36 | 17 |
| 319 | <i>T. cristatus</i>  | Male   | Mayenne | 7.3  | 7.3  | 1.0413 | 0.6127 | 1.94 | 0.1 | 18 | 32 | 17 |
| 320 | <i>T. cristatus</i>  | Female | Mayenne | 7.8  | 7.7  | 1.0969 | 0.5966 | 1.88 | 0.0 | 22 | 38 | 17 |
| 321 | <i>T. marmoratus</i> | Female | Mayenne | 10.5 | 9.0  | 1.1760 | 0.8260 | 3.00 | 1.9 | 33 | 55 | 15 |
| 322 | <i>T. marmoratus</i> | Female | Mayenne | 10.9 | 9.9  | 1.1875 | 0.8027 | 3.00 | 0.7 | 33 | 57 | 14 |
| 323 | <i>T. marmoratus</i> | Male   | Mayenne | 8.8  | 8.7  | 1.1553 | 0.7708 | 3.00 | 1.0 | 30 | 50 | 15 |
| 324 | <i>T. marmoratus</i> | Male   | Mayenne | 9.9  | 9.9  | 1.1613 | 0.7242 | 3.00 | 1.2 | 28 | 50 | 14 |
| 325 | <i>T. cristatus</i>  | Male   | Mayenne | 7.8  | 7.0  | 1.0791 | 0.5563 | 2.08 | 0.0 | 20 | 34 | 17 |
| 326 | <i>T. cristatus</i>  | Female | Mayenne | 9.0  | 8.5  | 1.1335 | 0.6071 | 1.18 | 0.3 | 22 | 32 | 16 |
| 327 | Hybrid               | Female | Mayenne | 9.9  | 10.0 | 1.2095 | 0.7781 | 2.22 | 0.1 | 30 | 50 | 16 |
| 328 | <i>T. marmoratus</i> | Female | Mayenne | 9.7  | 9.1  | 1.2068 | 0.7708 | 2.72 | 1.3 | 29 | 36 | 14 |
| 329 | <i>T. marmoratus</i> | Male   | Mayenne | 6.6  | 6.0  | 1.0863 | 0.6946 | 2.86 | 0.2 | 26 | 36 | 14 |
| 330 | <i>T. cristatus</i>  | Male   | Mayenne | 7.8  | 6.3  | 0.9030 | 0.4983 | 2.00 | 0.1 | 20 | 30 | 17 |
| 331 | Hybrid               | Male   | Mayenne | 10.1 | 10.0 | 1.1238 | 0.7403 | 3.00 | 1.0 | 25 | 47 | 16 |
| 332 | <i>T. marmoratus</i> | Female | Mayenne | 11.0 | 10.0 | 1.2014 | 0.8061 | 2.83 | 1.5 | 30 | 48 | 15 |
| 333 | <i>T. cristatus</i>  | Male   | Mayenne | 8.1  | 8.1  | 1.1072 | 0.6020 | 2.14 | 0.0 | 23 | 36 | 17 |
| 334 | Hybrid               | Male   | Mayenne | 9.9  | 8.7  | 1.1367 | 0.6946 | 2.72 | 0.4 | 24 | 42 | 15 |
| 335 | <i>T. marmoratus</i> | Female | Mayenne | 9.9  | 9.1  | 1.2014 | 0.8356 | 2.50 | 1.0 | 32 | 52 | 14 |
| 336 | <i>T. marmoratus</i> | Female | Mayenne | 10.9 | 10.0 | 1.1959 | 0.7323 | 3.00 | 1.2 | 30 | 55 | 15 |
| 337 | <i>T. marmoratus</i> | Female | Mayenne | 10.1 | 9.2  | 1.2121 | 0.7781 | 2.75 | 1.7 | 28 | 44 | 15 |
| 338 | <i>T. marmoratus</i> | Male   | Mayenne | 7.9  | 7.6  | 1.1072 | 0.6989 | 2.90 | 1.1 | 24 | 47 | 14 |
| 339 | <i>T. marmoratus</i> | Male   | Mayenne | 10.8 | 9.8  | 1.1731 | 0.7032 | 2.92 | 1.8 | 28 | 43 | 15 |
| 340 | <i>T. marmoratus</i> | Female | Banyuls | 10.1 | 9.6  | 1.1398 | 0.7481 | 2.95 | 1.4 | 28 | 46 | 14 |
| 341 | <i>T. marmoratus</i> | Female | Mayenne | 9.8  | 9.7  | 1.1731 | 0.7403 | 2.70 | 0.9 | 32 | 50 | 14 |
| 342 | <i>T. marmoratus</i> | Male   | Mayenne | 8.9  | 8.3  | 1.1553 | 0.6857 | 2.66 | 1.1 | 32 | 48 | 14 |



|     |                      |        |         |      |      |        |        |      |     |    |    |    |
|-----|----------------------|--------|---------|------|------|--------|--------|------|-----|----|----|----|
| 343 | <i>T. cristatus</i>  | Female | Mayenne | 7.9  | 6.9  | 1.1105 | 0.6180 | 2.10 | 0.2 | 21 | 43 | 17 |
| 344 | <i>T. cristatus</i>  | Female | Mayenne | 9.4  | 8.1  | 1.1461 | 0.5440 | 2.00 | 0.1 | 20 | 38 | 17 |
| 345 | <i>T. marmoratus</i> | Female | Mayenne | 10.8 | 9.2  | 1.1673 | 0.7442 | 2.77 | 0.8 | 30 | 45 | 15 |
| 346 | <i>T. marmoratus</i> | Male   | Mayenne | 8.4  | 7.8  | 1.1303 | 0.6902 | 2.85 | 1.1 | 30 | 45 | 15 |
| 347 | <i>T. marmoratus</i> | Male   | Mayenne | 8.0  | 8.0  | 1.1492 | 0.7323 | 2.80 | 1.0 | 28 | 44 | 14 |
| 348 | <i>T. cristatus</i>  | Male   | Mayenne | 8.1  | 7.0  | 1.1105 | 0.5622 | 2.12 | 0.1 | 22 | 38 | 17 |
| 349 | <i>T. cristatus</i>  | Female | Mayenne | 8.1  | 7.0  | 1.0791 | 0.5682 | 2.37 | 0.1 | 24 | 37 | 17 |
| 350 | <i>T. cristatus</i>  | Male   | Mayenne | 9.4  | 8.5  | 1.1172 | 0.6232 | 2.00 | 0.0 | 20 | 45 | 17 |
| 351 | <i>T. cristatus</i>  | Male   | Mayenne | 9.1  | 8.0  | 1.1139 | 0.6180 | 2.00 | 0.1 | 23 | 47 | 17 |
| 352 | <i>T. marmoratus</i> | Male   | Mayenne | 9.0  | 8.3  | 1.0934 | 0.6483 | 2.40 | 0.2 | 26 | 42 | 15 |
| 353 | <i>T. cristatus</i>  | Male   | Mayenne | 7.8  | 6.5  | 0.9493 | 0.5051 | 1.83 | 0.2 | 18 | 38 | 17 |
| 354 | <i>T. cristatus</i>  | Male   | Mayenne | 7.5  | 6.5  | 1.0791 | 0.4983 | 1.76 | 0.0 | 20 | 36 | 17 |
| 355 | <i>T. marmoratus</i> | Female | Mayenne | 8.7  | 7.7  | 1.1731 | 0.7634 | 2.85 | 1.0 | 27 | 51 | 14 |
| 356 | <i>T. cristatus</i>  | Male   | Mayenne | 8.1  | 6.8  | 1.1105 | 0.5682 | 2.13 | 0.0 | 18 | 35 | 17 |
| 357 | <i>T. cristatus</i>  | Male   | Mayenne | 8.2  | 7.5  | 1.0899 | 0.5682 | 1.69 | 0.0 | 25 | 44 | 17 |
| 358 | <i>T. cristatus</i>  | Female | Mayenne | 9.5  | 8.5  | 1.1139 | 0.6483 | 2.13 | 0.0 | 20 | 42 | 17 |
| 359 | <i>T. cristatus</i>  | Female | Mayenne | 9.8  | 9.0  | 1.1303 | 0.6580 | 2.28 | 0.0 | 26 | 38 | 17 |
| 360 | <i>T. cristatus</i>  | Female | Mayenne | 8.7  | 7.7  | 1.1367 | 0.6434 | 1.60 | 0.3 | 18 | 34 | 17 |
| 361 | <i>T. marmoratus</i> | Female | Banyuls | 9.5  | 9.2  | 1.1303 | 0.7323 | 2.94 | 1.2 | 32 | 48 | 15 |
| 362 | <i>T. cristatus</i>  | Male   | Mayenne | 8.6  | 8.4  | 1.1038 | 0.6180 | 1.56 | 0.0 | 28 | 42 | 17 |
| 363 | <i>T. marmoratus</i> | Male   | Banyuls | 10.1 | 8.9  | 1.1760 | 0.7403 | 2.66 | 0.7 | 28 | 40 | 14 |
| 364 | <i>T. marmoratus</i> | Female | Banyuls | 10.0 | 9.9  | 1.1476 | 0.7671 | 2.90 | 1.0 | 31 | 39 | 14 |
| 365 | <i>T. cristatus</i>  | Female | Mayenne | 7.6  | 7.0  | 1.0934 | 0.6074 | 1.85 | 0.1 | 18 | 32 | 17 |
| 366 | <i>T. marmoratus</i> | Female | Tulle   | 9.9  | 9.0  | 1.1303 | 0.7403 | 2.80 | 1.6 | 32 | 43 | 14 |
| 367 | <i>T. marmoratus</i> | Female | Mayenne | 10.4 | 9.5  | 1.1673 | 0.7596 | 2.70 | 0.8 | 30 | 53 | 14 |
| 372 | <i>T. marmoratus</i> | Female | Tulle   | 10.8 | 10.5 | 1.1430 | 0.7364 | 2.84 | 1.2 | 29 | 50 | 14 |



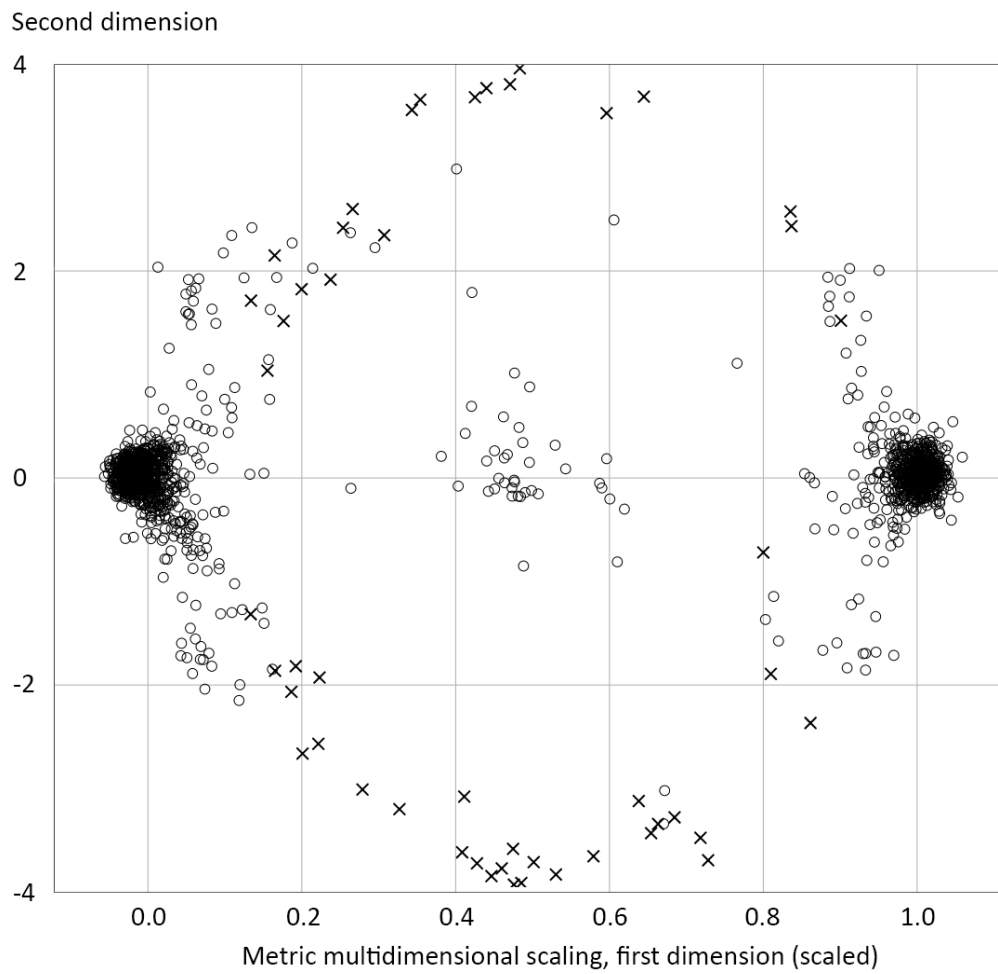

FIGURE S2 Graphical output of metric multidimensional scaling analyses of one run on the KASP-line, for 1,457 *Triturus* newts (*T. cristatus*, *T. marmoratus* and interspecific hybrids) from dept. Mayenne, France. Individuals with high ( $>3.4$ ) and low ( $<3.4$ ) signal strength are shown by open round symbols and crosses, respectively.
