# Supplementary material
Source: publisher figshare collection journal article supplement (https://brill.figshare.com/articles/dataset/_/26124259)
Supplement: Supplementary file 1 [file 1]

## Sheet: Run1
Run	LifeStage	abl_c	abl_m	dlgap_c	dlgap_m	edc4_c	edc4_m	eif4ebp2_c	eif4ebp2_m	ngef_c	ngef_m	phf_c	phf_m	slc5_c	slc5_m
1	hatchling	0.3979	0.75713	0.38224	0.71365	0.37511	0.65696	0.47399	0.71694	0.39642	0.64801	0.92511	0.63138	0.51646	0.66746
1	hatchling	3.23638	0.48833	3.50029	0.55411	3.27725	0.48623	1.96591	0.47799	3.12851	0.4762	2.79562	0.46531	2.84096	0.46149
1	hatchling	0.29101	0.60733	0.32005	0.69003	0.2923	0.5724	0.36749	0.62978	0.33002	0.52031	0.7452	0.55781	0.41638	0.58282
1	hatchling	0.23933	3.7071	0.55837	3.08137	0.24081	3.58487	0.30333	2.87697	0.30662	3.20192	0.37624	3.06632	0.31768	2.83345
1	hatchling	0.42006	0.58535	0.43237	0.63538	0.41697	0.55442	0.47205	0.55291	0.4755	0.53225	1.07877	0.63605	0.56716	0.52203
1	hatchling	3.98333	0.62969	3.80161	0.52173	3.78022	0.61941	3.4607	0.54993	3.65595	0.49317	3.50177	0.61871	3.49156	0.45214
1	hatchling	3.7539	0.61706	3.91585	0.66575	3.65281	0.72759	2.95127	1.32608	3.63601	0.5575	3.48794	0.68438	3.30214	0.50761
1	hatchling	3.68836	0.63186	3.8381	0.56822	3.53596	0.53205	3.13925	1.00906	3.6092	0.51716	3.36493	0.50805	3.33321	0.48185
1	hatchling	0.39935	0.68084	0.36397	0.6768	0.3441	0.56521	0.44449	0.67836	0.38039	0.49276	1.00722	0.63	1.49834	0.48144
1	hatchling	3.31841	0.56093	0.25926	0.40812	0.28156	0.39948	0.3154	0.54545	0.40028	0.42629	0.76022	0.42096	0.3372	0.37517
1	hatchling	3.56889	0.55468	3.46664	0.52964	3.30987	0.49042	0.49831	0.45477	3.4422	0.506	3.16546	0.44957	3.07244	0.45969
1	hatchling	0.32661	0.57502	0.31469	0.56052	0.3107	0.41707	0.37212	0.54166	2.80805	0.48249	0.79534	0.47442	0.38063	0.48162
1	hatchling	3.67236	0.56648	3.82914	0.54799	3.65331	0.58064	3.09882	0.5409	3.77036	0.49234	3.40046	0.54431	3.54571	0.47498
1	hatchling	0.36576	0.53142	0.39367	0.59728	0.39697	0.53314	0.47096	0.55201	0.4018	0.48756	0.9887	0.57566	0.54074	0.5757
1	hatchling	3.64923	0.63443	3.71722	0.58301	3.43653	0.57929	3.10945	0.65367	3.53938	0.4591	3.53079	0.54645	3.2315	0.45864
1	hatchling	3.37011	0.55666	3.89581	0.54285	3.4433	0.49548	3.16157	0.65684	3.56238	0.5189	3.47058	0.52779	3.25672	0.44809
1	hatchling	0.34811	0.59324	2.95959	0.5332	2.00724	0.52179	0.50536	0.58174	2.66392	0.46918	0.86644	0.55506	2.64876	0.47295
1	hatchling	0.34632	0.63967	0.34448	0.65237	0.35293	0.57274	0.69895	0.91334	0.40579	0.55429	0.84775	0.62036	0.47196	0.6539
1	hatchling	0.3202	0.4258	0.30451	0.45906	0.30394	0.38545	0.36285	0.50079	0.32439	0.40579	0.82828	0.45076	0.35558	0.40787
1	hatchling	0.31817	0.55043	0.31335	0.6034	0.34785	0.57152	0.65089	0.76235	0.36293	0.49428	0.93099	0.61987	0.4333	0.5023
1	hatchling	0.41369	0.84103	0.3866	0.77459	0.33925	0.64132	0.7563	0.99696	0.40955	0.61285	0.94517	0.64673	0.50184	0.65299
1	hatchling	3.63655	0.60513	3.69931	0.5706	3.71187	0.60377	3.12039	0.56137	3.57086	0.52037	3.48591	0.57146	3.32273	0.45804
1	hatchling	3.60381	0.56593	3.61465	0.53216	3.44558	0.56646	3.05223	0.50721	3.56745	0.5149	3.44024	0.54698	3.30272	0.52062
1	hatchling	3.56059	0.48581	3.83555	0.56399	3.61763	0.51973	3.08721	0.49698	3.43853	0.48086	3.37361	0.46475	3.17853	0.45385
1	hatchling	0.409	0.62641	0.33931	0.54885	0.31186	0.76033	0.37893	0.56011	0.36044	0.4957	0.81926	1.41758	0.3606	0.43259
1	hatchling	2.84841	0.53842	3.32614	0.55397	2.40504	0.46945	0.47607	0.64957	2.84233	0.45977	2.62942	0.45947	2.28268	0.43464
1	hatchling	3.5275	0.54508	3.66986	0.59521	3.61313	0.66844	2.71884	0.58626	3.53892	0.51849	3.32862	0.64055	3.49389	0.53571
1	hatchling	0.3148	0.57183	0.35721	0.70279	0.38318	0.61982	0.67509	0.85076	0.3924	0.50274	0.81608	0.58087	0.46584	0.56038
1	hatchling	3.10814	0.53576	3.34588	0.57412	2.77646	0.55019	0.44403	0.61907	2.78422	0.47619	1.90788	0.50472	2.43258	0.44006
1	hatchling	3.42324	0.53532	3.513	0.55411	3.44824	0.52992	1.68121	0.51696	3.44191	0.48039	3.01298	0.42034	3.06704	0.47329
1	hatchling	3.59488	0.55916	3.69652	0.55906	3.73639	0.64596	3.21381	0.56441	3.54969	0.50855	3.53038	0.57715	3.35479	0.49151
1	hatchling	3.63482	0.59939	3.943	0.58861	3.52922	0.53089	3.10704	0.71479	3.58326	0.50193	3.431	0.50127	3.47342	0.51142
1	hatchling	3.13957	0.56032	3.65015	0.68826	0.2939	0.48603	2.86532	0.60716	3.28871	0.55735	2.99615	0.51007	3.0326	0.47021
1	hatchling	3.56743	0.49222	3.64325	0.53993	3.49076	0.53706	1.77232	0.50166	3.48056	0.51941	3.39352	0.54024	2.95839	0.47674
1	hatchling	3.3385	0.52215	3.69388	0.58008	3.27539	0.50849	1.11224	0.48078	3.4039	0.51855	3.09717	0.52522	2.87321	0.49521
1	hatchling	3.53819	0.53289	3.74317	0.60162	3.51089	0.51034	2.09985	0.48083	3.65798	0.5006	3.37627	0.49006	3.22285	0.46769
1	hatchling	3.68538	0.56763	3.67201	0.54809	3.37751	0.51383	1.70543	0.50814	3.48642	0.51022	3.23533	0.50589	3.01221	0.47322
1	hatchling	3.57747	0.64326	3.71446	0.61903	3.44949	0.51173	3.14151	0.57651	3.61766	0.51324	3.57261	0.50851	3.31316	0.45877
1	hatchling	0.3317	0.56132	0.3352	0.59641	0.31329	0.47788	0.41466	0.54518	0.36385	0.47769	0.90838	0.54864	0.44449	0.52717
1	hatchling	3.66141	0.49836	3.8918	0.57064	3.5829	0.52279	2.92356	0.50993	3.47698	0.52008	3.19384	0.47168	2.99832	0.45544
1	hatchling	0.39876	0.68041	2.27647	0.5158	1.9428	0.48263	0.43445	0.64632	2.24339	0.48654	1.01456	0.61248	2.66877	0.44777
1	hatchling	2.55898	0.49894	0.313	0.52945	0.27747	0.45163	0.3489	0.4988	2.38808	1.5065	0.32541	3.23537	0.26599	3.16261
1	hatchling	0.30445	0.62401	0.34023	0.69195	0.31254	0.54914	0.60843	0.81151	0.36994	0.56504	0.81509	0.55001	0.47124	0.58618
1	hatchling	3.62384	0.50024	3.60946	0.54229	3.58932	0.59636	3.0245	0.57576	3.54701	0.50065	3.39369	0.51265	3.24685	0.47709
1	hatchling	3.63815	0.62092	3.68623	0.56042	3.48951	0.56399	2.82202	0.50531	3.52763	0.49935	3.38831	0.48294	3.28137	0.49411
1	hatchling	3.39408	0.48677	3.64794	0.55336	3.45347	0.54304	1.6717	0.50572	3.29476	0.46841	3.14066	0.47655	3.07684	0.49691
1	hatchling	0.28824	0.61871	0.33126	0.6269	0.34767	0.64432	0.4266	0.64689	0.36898	0.51621	0.88531	0.56829	0.45633	0.5646
1	hatchling	0.3032	0.53547	0.33501	0.58628	0.31925	0.51676	0.39813	0.56705	0.36529	0.49736	0.96816	0.60146	0.42149	0.5008
1	hatchling	3.21079	0.57596	3.55749	0.53485	2.97701	0.53168	2.14588	0.49981	3.30283	0.51137	3.01457	0.45356	3.01698	0.48575
1	hatchling	0.33321	0.65518	0.35235	0.69511	0.34682	0.57708	0.56431	0.81154	0.39892	0.5616	0.86763	0.63168	0.48733	0.62072
1	hatchling	0.23288	3.62498	0.23004	3.52826	0.21475	3.48651	0.36875	0.56973	0.28792	3.11065	0.46843	3.05359	0.30974	2.96306
1	hatchling	0.32139	0.60632	0.34189	0.66393	0.32611	0.57504	0.5129	0.71656	0.41023	0.53828	0.94567	0.57132	0.45532	0.54866
1	hatchling	3.59839	0.55229	3.82699	0.5907	3.60824	0.57591	2.87063	0.53264	3.54066	0.49136	3.52597	0.55134	3.31441	0.47165
1	hatchling	0.30388	0.61648	0.33514	0.7004	0.32199	0.62053	0.49589	0.79043	0.39325	0.5471	0.92711	0.63006	0.47051	0.56839
1	hatchling	3.68394	0.55983	3.56648	0.55914	3.61848	0.56405	3.29634	0.55426	3.60795	0.5347	3.50923	0.53228	3.25094	0.47846
1	hatchling	0.2825	0.4142	0.2751	0.45989	0.29593	0.42448	0.33156	0.62336	0.34421	0.45729	2.82504	0.42272	2.71252	0.4651
1	hatchling	0.57389	0.58966	0.33602	0.56923	0.31914	0.51265	0.42175	0.60118	1.46016	0.44853	0.97097	0.60513	0.61201	1.3755
1	hatchling	3.46369	0.50224	3.64199	0.51828	3.46767	0.55058	2.57049	0.51866	3.52432	0.50122	3.31816	0.50554	3.14462	0.48769
1	hatchling	0.31904	0.5461	0.28632	0.51313	0.31655	0.50715	0.39421	0.57658	2.59202	0.45432	1.55017	0.54344	0.38802	0.45401
1	hatchling	2.94508	0.55412	3.17532	0.533	2.36379	0.50813	0.42552	0.65612	2.68966	0.47347	1.06401	0.57427	2.46826	0.48
1	hatchling	0.33141	0.5923	0.35808	0.68	0.32061	0.52824	0.54507	0.70253	0.39056	0.5251	0.86324	0.5699	0.44685	0.51529
1	hatchling	3.72765	0.58381	3.76873	0.55778	3.53512	0.59667	3.06385	0.58743	3.63909	0.50944	3.3509	0.51113	3.30632	0.4962
1	hatchling	3.3336	0.52475	3.62427	0.57355	3.15559	0.48502	2.50193	0.52486	3.22815	0.49201	2.76874	0.47006	2.9479	0.48188
1	hatchling	3.62885	0.52977	3.83509	0.55667	3.69065	0.58516	3.2516	0.55864	3.63308	0.5433	3.28316	0.51859	3.15069	0.45661
1	hatchling	3.44674	0.55271	3.58709	0.58671	3.31456	0.53957	2.57188	0.56031	3.20902	0.49493	2.76902	0.48196	2.97769	0.47118
1	hatchling	3.1185	0.47594	3.34023	0.55877	2.92213	0.46353	0.55655	0.49296	2.99843	0.4782	2.47404	0.45888	2.48624	0.43123
1	hatchling	3.4017	0.45953	3.67706	0.54422	3.40274	0.45569	1.1062	0.43072	3.32391	0.49753	3.25047	0.47486	2.91566	0.41341
1	hatchling	0.3448	0.60446	0.35408	0.68519	0.33974	0.56926	0.60114	0.73671	0.38948	0.52537	0.96706	0.67392	0.45622	0.54525
1	hatchling	0.33619	0.65459	0.37659	0.77853	0.3577	0.65363	0.5706	0.76617	0.39615	0.63948	0.9143	0.63677	0.49387	0.58992
1	hatchling	0.32345	0.61765	0.36215	0.71329	0.29816	0.56148	0.48572	0.70948	0.38557	0.54881	0.8761	0.5994	0.47755	0.6027
1	hatchling	0.27466	0.57081	0.30188	0.60666	0.28937	0.51987	0.34536	0.54501	0.34681	0.47626	0.86817	0.50448	0.42658	0.50261
1	hatchling	3.77888	0.62611	3.82624	0.59711	3.55813	0.54734	3.37763	0.56249	3.5167	0.49736	3.41022	0.53692	3.16791	0.43589
1	hatchling	0.3911	0.72095	0.38298	0.65396	0.38955	0.58765	0.45044	0.62331	0.43167	0.56744	0.98907	0.67166	0.5528	0.57027
1	hatchling	3.21573	0.54519	3.31718	0.57478	3.02178	0.47747	0.664	0.57378	3.05517	0.50082	2.23306	0.51753	2.61667	0.4904
1	hatchling	1.69421	0.5175	0.30214	0.59018	0.323	0.55996	0.47103	0.62593	1.56642	0.46313	0.88858	0.54917	0.42884	0.52963
1	hatchling	0.34977	0.5769	0.3829	0.62627	0.34967	0.53241	0.53576	0.72425	0.38547	0.52074	0.79077	0.54248	0.50434	0.55842
1	hatchling	0.3093	0.53828	0.34497	0.63628	0.33761	0.56872	0.61501	0.79381	0.38077	0.53204	0.94495	0.56949	0.43888	0.53348
1	hatchling	0.29198	0.57892	0.31809	0.64717	0.32505	0.57414	0.41843	0.66518	0.35928	0.52837	0.92046	0.58203	0.4548	0.5554
1	hatchling	3.66753	0.58515	3.90142	0.60891	3.62245	0.64519	3.28667	0.83739	3.59424	0.52273	3.47586	0.56217	3.41999	0.507
1	hatchling	2.86481	0.43362	3.19243	0.48786	2.06106	0.46348	2.17815	0.47989	1.95442	0.39257	1.78232	0.45465	2.64712	0.45455
1	hatchling	2.97545	0.50054	3.46348	0.55404	3.32138	0.47195	1.50727	0.49146	3.12226	0.48083	2.39589	0.44205	2.63782	0.42222
1	hatchling	0.28441	0.59133	0.3116	0.63085	0.28505	0.54349	0.33865	0.58196	0.35644	0.52508	0.79119	0.54323	0.41138	0.6077
1	hatchling	0.34183	0.63698	0.35264	0.65663	0.3347	0.6	0.5237	0.737	0.41325	0.57928	0.95155	0.64565	0.5353	0.59088
1	hatchling	3.40859	0.53683	0.27405	0.46369	0.28913	0.4243	2.87953	0.518	0.33037	0.37442	0.76286	0.45143	3.1211	0.44461
1	hatchling	3.62429	0.58617	3.76774	0.61298	3.55368	0.6855	3.33594	0.57872	3.50868	0.5235	3.51174	0.56769	3.38086	0.47131
1	hatchling	0.36958	0.58708	2.97244	0.48737	2.25645	0.40033	0.90628	0.47204	2.8604	0.43764	0.90461	0.50254	2.03351	0.44504
1	hatchling	3.67493	0.59213	3.86538	0.61171	3.61539	0.59324	3.29666	0.57561	3.52243	0.49822	3.25314	0.5206	3.35071	0.53196
1	hatchling	0.29866	0.58392	0.29907	0.62949	0.29067	0.5317	0.36258	0.54277	0.34763	0.48411	0.81022	0.5296	0.41398	0.5342
1	hatchling	0.35474	0.72893	0.33904	0.70136	0.34832	0.65272	0.44082	0.67359	0.41577	0.58873	0.93631	0.69438	0.53807	0.65375
1	hatchling	3.55652	0.51349	3.69813	0.61395	3.44638	0.68031	2.00633	1.87681	3.49065	0.54289	3.30225	0.49002	3.1129	0.45898
1	hatchling	2.93501	0.52823	1.12642	0.45792	0.29833	0.47547	1.37607	0.47548	0.34363	0.4576	0.53355	2.73353	0.35389	0.43351
1	hatchling	0.37389	0.66019	0.37339	0.75186	0.34061	0.59877	0.39543	0.58917	0.4016	0.55214	0.92179	0.62121	0.46327	0.59632
1	hatchling	3.7677	0.58258	3.90211	0.65945	3.66004	0.74318	3.45033	0.55982	1.00632	2.58943	3.5075	0.57387	3.43154	0.55636
1	hatchling	3.76186	0.5567	3.74252	0.6405	3.61142	0.71207	3.51154	0.5702	3.59338	0.53492	3.54958	0.5177	3.41036	0.47989
1	hatchling	3.63292	0.55467	3.88765	0.60064	3.53833	0.63405	3.24105	0.58514	3.44252	0.5156	2.51981	0.45954	3.23144	0.44958
1	hatchling	0.32331	0.5861	0.34373	0.61638	0.3217	0.56491	0.35208	0.51547	0.3752	0.51262	0.90152	0.55125	0.4516	0.51144
1	hatchling	0.38322	0.73467	0.32621	0.70027	0.32855	0.64417	0.43742	0.68252	0.38914	0.57199	0.88062	0.68965	0.49739	0.647
1	hatchling	0.31316	0.57578	0.31135	0.61903	0.3112	0.56124	0.38167	0.59954	0.35482	0.48385	0.91093	0.58744	0.41901	0.55081
1	hatchling	0.3091	0.50274	1.09019	0.48608	0.33868	0.54184	0.42545	0.61386	1.52949	0.49229	0.51608	0.5786	1.47412	0.49059
1	hatchling	0.3392	0.69012	0.36269	0.6778	0.35472	0.61185	0.46094	0.67976	0.38899	0.57925	0.91656	0.59744	0.47472	0.58768
1	hatchling	3.64514	0.5607	3.84219	0.60438	3.66318	0.63039	3.27048	0.57522	3.57719	0.51641	3.39664	0.54506	3.26481	0.48171
1	adult	3.76283	0.62884	3.83215	0.54042	3.60156	0.58624	3.36142	0.48282	3.63206	0.51604	3.56522	0.56128	3.3179	0.46189
1	adult	3.63858	0.52309	3.81375	0.51413	3.58446	0.53813	3.25784	0.78912	3.61708	0.54414	3.52129	0.58684	3.36818	0.4671
1	adult	3.59381	0.64702	4.0338	0.57462	3.75252	0.62102	3.45041	0.48282	3.70504	0.5006	3.39454	0.52008	3.53002	0.48949
1	hatchling	0.3284	0.73708	0.34198	0.71507	0.34921	0.64593	0.41467	0.65684	0.38085	0.59076	0.93941	0.72698	0.50326	0.60274
1	hatchling	0.28289	0.59191	0.28027	0.65529	0.28334	0.54282	0.55895	0.84754	0.34415	0.53401	0.75821	0.56865	0.40662	0.56425
1	hatchling	3.35847	0.54737	3.60031	0.58634	3.24677	0.52698	0.88472	0.44756	3.28666	0.51837	0.77827	0.42159	0.35046	0.43431
1	hatchling	3.81591	0.61224	3.67293	0.58167	3.4642	0.58593	2.80512	0.55761	3.58959	0.4684	3.37924	0.52013	3.36327	0.45283
1	hatchling	3.21223	0.49954	3.64047	0.5301	0.28225	0.75947	0.82515	0.45649	3.44058	0.48682	3.01059	0.47769	3.05652	0.50001
1	adult	3.65084	0.63131	3.7496	0.56662	3.58045	0.58397	3.09971	0.55326	3.5071	0.48392	3.49941	0.56392	3.41229	0.46341
1	adult	3.71796	0.56808	3.79364	0.5422	3.58698	0.54793	3.29824	0.53877	3.481	0.47846	3.51488	0.51975	3.29747	0.44431
1	adult	3.54351	0.57337	4.02029	0.57984	3.69836	0.60546	3.42932	0.63817	3.58055	0.51875	3.50473	0.55295	3.43484	0.47077
1	hatchling	3.3736	0.60303	3.64253	0.67377	3.15339	0.86915	3.07039	0.62882	3.43966	0.57077	3.20688	0.61524	3.31343	0.51618
1	hatchling	2.87315	0.47814	3.59451	0.5576	2.5246	0.49814	0.44224	0.57822	3.23424	0.52431	0.86447	0.50837	0.36481	0.4568
1	hatchling	3.25428	0.52961	3.53184	0.55144	3.20633	0.55759	0.39262	0.51311	3.1848	0.51276	3.01592	0.47418	2.73609	0.46799
1	hatchling	3.52455	0.58204	3.68174	0.63449	3.29955	0.52744	0.53905	0.58588	3.17213	0.47825	3.02691	0.51848	2.98	0.50662
1	hatchling	3.38014	0.5133	3.81053	0.57509	3.15094	0.50301	0.84436	0.49216	3.41869	0.50537	3.20949	0.52489	2.98029	0.48797
1	adult	3.60602	0.6075	3.8421	0.59848	3.58711	0.6413	3.04011	0.5381	3.64231	0.51921	3.45416	0.55559	3.48957	0.47377
1	adult	3.68865	0.55806	3.84016	0.58484	3.65103	0.5686	3.27231	0.57239	3.61801	0.50738	3.56317	0.55254	3.48518	0.52766
1	adult	3.72174	0.59799	3.7942	0.58174	3.70935	0.65363	3.2684	0.88882	3.58624	0.48721	3.51879	0.59935	3.33085	0.48812
1	hatchling	3.27636	0.60468	3.58382	0.66279	3.2968	0.84719	3.0542	0.66871	3.38934	0.5541	3.15657	0.58529	3.1788	0.52939
1	hatchling	3.16603	0.51853	3.27138	0.56046	2.79313	0.47433	0.47934	0.69413	2.84035	0.46119	2.64215	0.53278	2.29577	0.45606
1	hatchling	3.61495	0.53303	3.68798	0.55531	2.26321	0.58796	1.4296	0.45795	3.51953	0.5022	3.41081	0.57023	3.35388	0.45886
1	hatchling	3.50931	0.55383	3.7077	0.60495	3.40106	0.6829	1.98031	0.5348	3.474	0.53591	3.40144	0.5348	3.14892	0.50415
1	hatchling	3.54427	0.5492	3.70624	0.53391	3.7093	0.61827	2.85015	0.53864	3.56475	0.53875	3.46616	0.5157	3.27501	0.4502
1	adult	3.51172	0.49246	3.52553	0.52342	3.42118	0.51136	1.55378	0.48882	3.27538	0.47709	3.05481	0.47055	2.84911	0.43758
1	adult	3.80651	0.67017	3.8355	0.62542	3.63587	0.59662	3.31238	0.53935	2.40298	1.71373	3.53235	0.56965	3.40089	0.45696
1	adult	3.69052	0.55702	3.88276	0.52204	3.62938	0.54326	3.3001	0.5151	3.68696	0.50607	3.5724	0.56186	3.5022	0.48857
1	hatchling	0.32886	0.62383	0.32986	0.63666	0.31873	0.53685	0.37408	0.62254	0.36141	0.54065	0.76299	0.56905	0.42942	0.56306
1	hatchling	0.35989	0.71814	0.34462	0.75953	0.33049	0.58362	0.62492	0.90062	0.41371	0.63229	0.89102	0.69937	0.48548	0.6273
1	hatchling	3.30579	0.54025	3.26995	0.57461	2.79519	0.46287	0.43732	0.61279	2.87148	0.47059	2.57835	0.49178	2.49856	0.46978
1	hatchling	0.29387	0.66291	0.3493	0.70468	0.32408	0.62405	0.54484	0.8031	0.35401	0.57403	0.82304	0.59776	0.41358	0.59454
1	hatchling	0.29883	0.61144	0.33829	0.66794	0.30361	0.58951	0.52737	0.75655	0.36146	0.55858	0.81734	0.62158	0.42911	0.56054
1	adult	3.62804	0.5275	3.68177	0.56065	3.49835	0.537	2.26583	0.4712	3.28519	0.49011	3.3037	0.50952	3.17949	0.48304
1	adult	3.59772	0.56618	3.70576	0.58102	3.6132	0.6391	3.21263	0.54003	3.61419	0.46225	3.42191	0.5632	3.47126	0.47453
1	adult	3.65724	0.5521	4.00408	0.62948	3.7309	0.64459	3.46263	0.77227	3.62777	0.5211	3.78891	0.63818	3.58148	0.49988
1	hatchling	0.42212	0.78447	0.39308	0.78419	0.34424	0.63299	0.453	0.76311	0.42819	0.61252	0.9118	0.72307	0.48092	0.6344
1	hatchling	0.26835	0.52248	0.27069	0.57504	0.24431	0.47679	0.3611	0.58211	0.30219	0.49354	0.70502	0.47463	0.34811	0.5138
1	hatchling	0.29618	0.4522	0.28647	0.48196	0.30098	0.43299	0.34621	0.53444	0.33628	0.43355	0.79313	0.49075	0.38839	0.41074
1	hatchling	0.28955	0.51154	0.30621	0.61141	0.30863	0.51785	0.43955	0.61958	0.34543	0.49386	0.81469	0.5276	0.40918	0.4853
1	hatchling	2.32687	0.51631	2.06932	0.501	0.85832	0.48335	0.44731	0.60169	1.94805	0.42414	0.96148	0.55388	0.91796	0.76079
1	adult	3.74532	0.59687	3.74377	0.58318	3.71806	0.6283	3.35691	0.57592	3.57512	0.50523	3.55081	0.52706	3.44059	0.49437
1	adult	3.52079	0.51958	3.80368	0.59104	3.45825	0.5106	3.01845	0.48097	3.48561	0.48927	3.18385	0.47893	3.22517	0.4745
1	adult	3.84405	0.60594	3.85699	0.54829	3.68146	0.62543	3.43121	0.6701	3.6208	0.4884	3.54197	0.58768	3.46496	0.49823
1	hatchling	0.38522	0.72535	0.34195	0.62606	0.32956	0.55253	0.46456	0.69056	0.37343	0.53179	0.97967	0.65129	0.4572	0.54216
1	hatchling	3.21055	0.51871	3.35281	0.51168	2.698	0.47981	1.26629	0.48213	3.26696	0.51736	2.83559	0.46562	2.73977	0.48328
1	hatchling	0.32303	0.5827	0.35268	0.67616	0.34596	0.6179	0.55175	0.70502	0.38058	0.54403	0.91278	0.58765	0.45058	0.59659
1	hatchling	2.80054	0.5308	3.19606	0.55757	2.54597	0.47493	0.4133	0.55068	2.72614	0.47471	0.76697	0.58742	2.08856	0.42309
1	hatchling	3.6665	0.6026	3.661	0.64639	3.414	0.56505	2.73464	0.55362	3.54791	0.48933	3.43511	0.56714	2.20176	1.61519
1	adult	3.44423	0.56096	3.62588	0.53245	3.66705	0.54171	3.1028	0.54409	3.5716	0.49125	3.32897	0.4812	3.27408	0.4424
1	adult	3.70831	0.56284	3.708	0.56485	3.50812	0.55571	3.38781	0.53379	3.61543	0.50379	3.43278	0.49856	3.35055	0.48762
1	adult	3.64546	0.49645	3.88014	0.52487	3.75878	0.53607	3.2436	0.5096	3.66184	0.50994	3.45679	0.47198	3.30152	0.47461
1	hatchling	3.54492	0.60164	3.77468	0.67474	3.56988	0.70285	3.18564	0.58559	3.35359	0.54548	3.37234	0.60399	3.26028	0.49458
1	hatchling	0.30586	0.59646	0.32704	0.62741	0.32318	0.58584	0.44116	0.68066	0.35602	0.55369	0.8637	0.60478	0.43939	0.53986
1	hatchling	3.58586	0.52007	3.72659	0.55985	3.41873	0.57345	2.42122	0.53634	3.53622	0.51104	3.30741	0.50323	3.0568	0.49739
1	hatchling	3.6223	0.60785	3.7481	0.60765	3.32987	0.58035	1.84332	0.50938	3.39031	0.51267	3.164	0.49081	3.03921	0.4966
1	hatchling	0.21475	3.66371	0.22429	3.82012	0.19962	3.42958	0.28448	2.38861	0.27675	3.32556	0.34189	3.13928	0.27991	3.08272
1	adult	3.80258	0.59729	3.73249	0.53178	3.55074	0.63109	3.20662	0.57327	3.67015	0.54102	3.58765	0.53939	3.44785	0.49014
1	adult	3.75534	0.57049	3.67511	0.55131	3.58216	0.60892	2.85053	1.21202	3.62667	0.5379	3.44076	0.53643	3.23118	0.45958
1	adult	3.60497	0.51374	3.88282	0.5312	3.60015	0.53047	3.32892	0.47103	3.57066	0.50772	3.51317	0.51485	3.39107	0.45298
1	hatchling	0.3633	0.56327	0.30363	0.479	0.28195	0.46181	0.36944	0.57297	0.368	0.45747	0.85973	0.51563	0.39477	0.48174
1	hatchling	0.34614	0.68066	0.32075	0.70199	0.33205	0.64878	0.43802	0.73756	0.37831	0.53377	0.82991	0.57649	0.46137	0.62118
1	hatchling	0.28601	0.55675	0.27571	0.63222	0.30071	0.49513	0.40992	0.64176	0.32029	0.49382	0.70433	0.52455	0.37431	0.49597
1	hatchling	3.55166	0.55171	3.81169	0.56874	3.51444	0.59381	3.09256	0.60732	3.21783	0.47901	3.42581	0.53109	3.43309	0.47408
1	hatchling	3.6873	0.58275	3.80184	0.59009	3.52209	0.61634	3.19093	0.55755	3.59241	0.49832	3.57599	0.5617	3.44708	0.47821
1	adult	3.5252	0.53953	3.78542	0.60927	3.44611	0.58681	3.28985	0.58909	3.69919	0.51233	3.45055	0.52711	3.3507	0.47668
1	adult	3.77201	0.61118	3.79391	0.54139	3.62846	0.6186	3.45253	0.52808	3.58345	0.50491	3.45093	0.56152	3.30098	0.46471
1	adult	3.78981	0.59551	3.10571	0.96341	3.69849	0.64889	3.40455	0.8819	3.65539	0.54333	3.59398	0.56673	3.43979	0.48287
1	hatchling	3.56656	0.69761	3.65858	0.74155	3.38789	0.92521	3.41808	0.73516	3.28561	0.50171	3.30425	0.6764	3.46649	0.54295
1	hatchling	0.31009	0.50486	0.26312	0.45843	0.27445	0.42601	0.31356	0.48313	0.32282	0.40083	0.72094	0.40328	3.126	0.45648
1	hatchling	0.34413	0.6705	0.34345	0.68594	0.32434	0.54737	0.51794	0.68499	0.38345	0.55473	0.89644	0.60178	0.46554	0.56364
1	hatchling	0.28388	0.55767	0.30757	0.61479	0.3015	0.54756	0.43872	0.63512	0.36438	0.50467	0.81502	0.52167	0.44152	0.5633
1	hatchling	3.43946	0.46301	1.82785	2.51162	1.7492	2.11141	2.6779	0.54033	3.37831	0.5072	1.53985	2.39821	3.12471	0.48395
1	adult	3.46903	0.64717	3.78104	0.54231	3.64014	0.56644	3.24903	0.57721	3.49052	0.51646	3.40745	0.52321	3.11929	0.4986
1	adult	3.62855	0.51395	3.79738	0.59881	3.45389	0.56601	3.06134	0.50172	3.52438	0.51137	3.34922	0.51257	3.13699	0.49094
1	adult	3.61137	0.48463	3.80595	0.51789	3.67321	0.59064	3.35345	0.56023	3.41232	0.48932	3.39669	0.52733	3.15609	0.47887
1	hatchling	0.31241	0.65046	0.3039	0.66045	0.289	0.561	0.36716	0.61544	0.36762	0.5702	0.76795	0.54219	0.4383	0.59905
1	hatchling	3.60721	0.6032	3.70439	0.64714	3.50312	0.76603	3.50577	0.67516	3.56841	0.53466	3.38215	0.58295	3.43377	0.47403
1	hatchling	0.36158	0.58999	0.37564	0.64025	0.36262	0.54197	0.43457	0.62584	0.40204	0.51631	0.83121	0.57507	0.49943	0.5575
1	hatchling	1.51385	0.53899	2.53768	0.51079	1.34984	0.47282	0.64277	0.50049	1.79291	0.45849	0.91999	0.59131	2.07783	0.43058
1	hatchling	3.68912	0.53438	3.71597	0.56272	3.25503	0.5938	1.53847	2.24712	3.34468	0.5265	3.27997	0.50083	1.48554	1.82571
1	adult	3.67583	0.571	3.80568	0.59078	3.59771	0.66414	3.35551	0.54867	3.63258	0.50444	3.53177	0.58381	3.42124	0.47019
1	adult	3.75381	0.58636	3.86516	0.60532	3.54177	0.62213	3.41043	0.85479	3.6251	0.53039	3.42757	0.59051	3.49813	0.47556
1	adult	3.70522	0.56168	3.92507	0.58109	3.52298	0.65943	3.44635	0.6463	3.62747	0.53327	3.65935	0.5853	3.46326	0.47423
1	hatchling	0.33351	0.68025	0.37468	0.67779	0.36636	0.63165	0.37618	0.62524	0.43724	0.59868	0.92676	0.65588	0.50109	0.57256
1	hatchling	3.68418	0.59867	3.67331	0.62594	3.44031	0.80195	2.76952	1.51971	3.5316	0.50365	3.30827	0.61313	3.38376	0.47605
1	hatchling	0.42383	0.63129	0.66943	0.58302	0.32839	0.56395	0.36124	0.55008	0.7021	0.52802	0.96347	0.61202	0.55571	0.54434
1	hatchling	3.33099	0.44566	3.41632	0.53258	3.22795	0.44827	2.28237	0.51427	0.58078	0.44855	2.37764	0.4908	2.74447	0.42471
1	adult	3.68116	0.51785	3.72237	0.60194	3.50432	0.6241	3.19437	0.54793	3.49786	0.51474	3.48125	0.58669	3.33033	0.50201
1	adult	3.68018	0.51134	3.77796	0.58727	3.58253	0.71304	3.55886	0.64809	3.47102	0.51708	3.33962	0.65901	3.49693	0.4659
1	adult	3.65534	0.56142	3.81977	0.58288	3.93745	0.63898	3.4378	0.57482	3.57668	0.54795	3.43565	0.56801	3.40052	0.46245
1	adult	3.59715	0.56773	3.80954	0.61877	3.70139	0.72424	3.42528	0.60208	3.57885	0.52422	3.57724	0.62496	3.39253	0.46972
1	hatchling	3.59376	0.61247	3.91221	0.67021	3.54788	0.71029	3.41056	0.60677	3.50524	0.51563	3.51303	0.64504	3.38839	0.49098
1	hatchling	0.33545	0.5834	0.31225	0.55361	0.31559	0.4717	0.38191	0.57569	0.36421	0.49457	0.96205	0.53303	0.3943	0.47429
1	hatchling	0.2365	3.77026	0.23671	3.69687	0.4329	3.40774	0.2551	3.30095	0.31302	3.29272	0.7206	3.23512	0.27721	3.36736
1	hatchling	0.29875	0.65503	0.34185	0.72236	0.33294	0.59867	0.38088	0.58987	0.36335	0.53783	0.91228	0.63676	0.47831	0.60102
1	hatchling	0.21686	3.65057	0.24737	3.81805	0.20048	3.67745	0.27418	3.32067	0.4447	3.24243	0.42892	3.14043	0.26726	3.47018
1	hatchling	0.24632	3.53407	0.27376	3.63804	0.20247	3.51823	0.31799	3.36196	0.36641	3.26195	0.56801	3.2618	0.28146	3.2938
1	adult	3.79989	0.68289	4.03715	0.5452	3.74342	0.55823	3.4076	0.70381	3.6131	0.51253	3.61039	0.5599	3.49063	0.47477
1	adult	3.92592	0.75505	3.90271	0.58154	3.72395	0.65844	3.45627	0.49477	3.68386	0.53494	3.49842	0.59385	3.54209	0.48659
1	hatchling	3.65371	0.58808	3.80358	0.64664	3.40776	0.70926	3.26842	0.59639	3.49282	0.52724	3.47195	0.58847	3.35398	0.50667
1	hatchling	3.65956	0.63678	3.82287	0.62337	3.46001	0.62613	3.04082	0.55244	3.58989	0.4998	3.4747	0.63055	3.35858	0.46789
1	hatchling	3.53879	0.60055	3.72944	0.54322	3.7016	0.57533	2.82655	0.50317	3.49325	0.48469	3.25654	0.4713	3.23807	0.48554
1	hatchling	2.84846	0.53275	2.09084	0.69196	1.30039	0.51197	0.45383	0.61658	2.40581	0.46935	0.90141	0.54987	2.09471	0.47656
1	hatchling	3.58437	0.62529	3.84308	0.55833	3.35843	0.54868	2.81116	0.48254	3.65795	0.49122	3.40671	0.4873	2.84655	0.63692
1	hatchling	0.21891	3.69594	0.24218	3.63167	0.22313	3.67408	0.25396	3.22751	0.28334	3.29286	0.44421	2.9918	0.2774	3.04312
1	adult	3.87631	0.60622	3.84276	0.57669	3.43703	0.53394	3.39873	0.51245	3.56224	0.50852	3.60665	0.57058	3.44387	0.50084
1	adult	2.11316	2.66165	2.70794	2.32072	2.09856	2.24247	2.01567	2.4662	2.59869	1.94115	2.1463	2.14447	2.24685	2.07279
1	hatchling	3.54813	0.56563	3.6449	0.60661	3.39297	0.71717	3.04925	0.56583	3.62462	0.52747	3.511	0.61252	3.27548	0.4633
1	hatchling	2.30705	2.02549	2.45723	2.39786	2.35693	1.9308	1.34922	1.91591	2.51712	1.75524	1.85071	2.41092	1.90995	2.03827
1	hatchling	3.2486	0.51259	3.70639	0.56989	3.26023	0.55841	1.21527	0.48048	3.5769	0.52334	0.72927	0.42468	0.3413	0.40597
1	hatchling	3.19608	0.46861	3.39635	0.50852	3.20537	0.4596	0.44205	0.54172	3.14002	0.48304	2.64959	0.47367	2.71179	0.47939
1	hatchling	0.26857	3.50355	0.24531	3.48548	0.21849	3.47272	0.42869	0.5384	0.29822	3.09441	0.81121	0.88436	0.33097	2.49754
1	hatchling	0.22848	3.86385	0.21983	3.57571	0.20504	3.76728	0.27393	3.22914	0.30745	3.5141	0.31569	3.43047	0.28141	3.32588
1	adult	3.58118	0.56883	3.62859	0.54366	3.61687	0.56434	3.28609	0.66607	3.62856	0.53806	3.49622	0.51626	3.33986	0.47517
1	adult	2.80948	1.65095	2.81631	1.63156	1.82868	2.2024	1.9496	2.42341	2.99593	1.21608	2.23216	1.89073	1.69329	1.93707
1	hatchling	3.51278	0.54923	3.75778	0.63227	3.47281	0.75777	3.21638	0.59245	3.63895	0.55208	3.32708	0.70853	3.45121	0.53014
1	hatchling	3.49733	0.58236	3.737	0.57433	3.4769	0.61429	1.54122	0.48399	3.37461	0.47593	3.32498	0.53446	3.27701	0.52955
1	hatchling	3.34526	0.56329	3.56138	0.53219	3.39097	0.57811	1.60854	0.48631	3.35904	0.48512	3.38097	0.53382	3.16053	0.47604
1	hatchling	0.35361	0.5593	0.37303	0.64084	0.3718	0.65491	0.76094	0.91407	0.40349	0.4939	0.95545	0.61796	0.47871	0.51287
1	hatchling	0.22614	3.64739	0.48904	3.38682	0.19593	3.64362	0.32343	1.76385	0.28129	3.28123	0.35228	3.35783	0.27424	3.13144
1	hatchling	0.22924	3.56854	0.27631	3.51658	0.20776	3.75887	0.29879	2.76102	0.41758	3.15857	0.30771	3.37315	0.27798	3.14402
1	adult	3.55256	0.61407	3.84952	0.60151	3.69841	0.62288	3.41426	0.59107	3.61705	0.53504	3.56702	0.5991	2.98284	0.4802
1	adult	2.55381	1.9279	2.75466	1.88373	2.35992	1.83991	1.83229	2.26333	2.61595	1.32481	1.84619	2.28803	1.92288	1.88945
1	hatchling	1.11586	0.58234	0.32388	0.55711	0.30868	0.49958	0.42131	0.60229	0.35358	0.47163	0.94149	0.63091	0.42867	0.51573
1	hatchling	3.58231	0.55022	3.75689	0.53727	3.43615	0.56231	2.5835	0.54936	3.48792	0.52009	3.2246	0.48234	3.13329	0.45271
1	hatchling	0.64349	2.3794	0.58666	1.35708	0.32063	0.54195	0.57039	0.70238	0.55773	0.66117	0.94219	0.57218	0.55506	1.02255
1	hatchling	0.30995	0.64412	0.32026	0.66853	0.31943	0.64129	0.55193	0.82877	0.37047	0.55613	0.84008	0.62552	0.47084	0.56744
1	hatchling	0.2007	3.58154	0.24625	3.64648	0.19167	3.5985	0.27764	3.31389	0.33338	3.29187	0.3396	3.38457	0.24976	3.33119
1	hatchling	0.21966	3.77494	0.25807	3.55185	0.20466	3.71806	0.26171	3.39973	0.28608	3.32755	0.29848	3.32601	0.26723	3.36787
1	adult	3.64432	0.58963	3.88294	0.54672	3.54897	0.57201	3.4004	0.56351	3.51433	0.53077	3.48824	0.5295	3.28017	0.98035
1	adult	3.60941	0.54317	3.9482	0.57537	3.59547	0.60499	3.40219	0.58368	3.6604	0.54707	3.41595	0.66617	3.33809	0.45835
1	hatchling	3.26591	0.51927	3.80886	0.60766	3.39797	0.62021	3.03613	0.52405	3.4977	0.55311	3.31432	0.52697	3.2812	0.50059
1	hatchling	3.50089	0.55282	3.64119	0.60104	3.449	0.586	2.86683	0.54247	3.48401	0.49681	3.41304	0.52327	3.33682	0.47892
1	hatchling	0.27534	0.63822	0.32825	0.67496	0.31258	0.60436	0.53002	0.80013	0.34058	0.59031	0.82509	0.57659	0.44142	0.59238
1	hatchling	2.21786	0.47001	0.30244	0.59464	0.3219	0.52947	0.44825	0.63236	2.00266	0.4271	0.54677	0.53792	0.40954	0.50907
1	hatchling	0.22375	3.73203	0.25074	3.6743	0.19371	3.59647	0.29037	3.26761	0.32167	3.29184	0.3727	3.24385	0.27487	3.38465
1	hatchling	0.32721	0.56315	0.28564	0.4184	0.28405	0.39835	0.2734	2.98909	0.2928	3.25521	0.77336	0.42416	0.3743	0.4094
1	adult	3.63042	0.58211	3.77401	0.6116	3.68124	0.59092	3.42393	0.55838	3.54993	0.52391	3.52161	0.52091	3.43245	0.46409
1	adult	3.73253	0.68943	3.87274	0.59749	3.74894	0.7042	3.52555	0.52403	3.66241	0.53565	3.57147	0.59299	3.3168	0.45698
1	hatchling	0.28891	0.62375	0.30752	0.72348	0.32837	0.63315	0.4129	0.67249	0.36415	0.57364	0.87832	0.65366	0.48113	0.66464
1	hatchling	2.5619	0.42722	3.04092	0.47725	2.00855	0.40496	0.41296	0.46853	2.7374	0.46295	1.45941	0.45913	1.95204	0.4061
1	hatchling	0.29326	0.49618	0.29393	0.50418	2.41914	0.47601	0.34217	0.51953	0.33502	0.4615	0.81978	0.47108	0.36656	0.46363
1	hatchling	0.28061	0.62547	0.32527	0.66086	0.32046	0.60837	0.45467	0.6808	0.33352	0.54139	0.85779	0.56662	0.43519	0.59668
1	hatchling	0.21844	3.70654	0.22945	3.57981	0.20524	3.59815	0.26311	3.23908	0.29095	3.22905	0.30287	3.34598	0.27513	3.42631
1	hatchling	0.29389	0.44902	0.75079	2.84072	0.52762	0.46801	0.34877	0.48121	0.33892	0.43004	0.47169	2.84513	0.28571	2.8866
1	adult	3.72475	0.53467	3.64792	0.52819	3.56802	0.59011	3.38922	0.51272	3.5196	0.49639	3.52763	0.53782	3.29503	0.47458
1	adult	0.21771	3.65358	0.32043	3.7989	0.20389	3.63173	0.37559	3.35319	0.38696	3.33098	0.41939	3.22464	0.28736	3.39208
1	hatchling	3.59523	0.55733	3.72113	0.60816	3.38362	0.61304	2.97594	0.5505	3.4605	0.50612	3.14018	0.50104	3.10658	0.50092
1	hatchling	0.30754	0.4997	0.28292	0.5014	0.32202	0.46551	0.31948	0.49581	3.22851	0.49678	0.8071	0.46014	0.37609	0.47876
1	hatchling	3.502	0.56675	3.52436	0.52365	3.28153	0.52204	0.68469	0.51161	3.13656	0.47504	2.89988	0.49307	2.83862	0.44796
1	hatchling	0.33321	0.72089	2.36227	1.9668	0.22569	2.23225	0.26414	2.89126	0.30969	3.24653	0.28493	3.24003	0.26722	3.35223
1	hatchling	0.2063	3.83502	0.2224	3.63523	0.18243	3.49014	0.26525	3.14913	0.3254	3.43829	0.28108	3.31607	0.26037	3.26814
1	hatchling	2.04555	1.79952	3.70957	0.54292	1.13097	2.66766	1.00442	2.29232	3.34557	0.53166	3.297	0.49026	3.03387	0.49522
1	adult	3.58068	0.46822	3.80823	0.56148	3.52217	0.49537	3.27439	0.48481	3.4833	0.48914	3.42776	0.51134	3.25429	0.48101
1	adult	0.23204	3.77055	0.27056	3.6712	0.21145	3.60796	0.39084	3.34393	0.39076	3.32447	0.44818	3.50671	0.30263	3.32727
1	hatchling	0.34695	0.45477	1.8015	0.44172	0.43672	0.47348	0.41177	0.53946	2.04998	0.40232	0.94179	0.51062	0.83875	0.46875
1	hatchling	3.20097	0.48958	3.53427	0.58433	3.22804	0.49857	0.87685	0.48011	3.22242	0.48409	2.95417	0.4724	2.84861	0.4577
1	hatchling	0.29533	0.65641	0.32357	0.73758	0.28344	0.61711	0.56093	0.83027	0.34689	0.57504	0.8166	0.60625	0.45708	0.61963
1	hatchling	3.58885	0.53811	3.72148	0.5416	3.60209	0.56933	2.56571	0.55734	3.53027	0.49437	3.37551	0.56364	3.09089	0.47523
1	hatchling	0.20274	3.72286	0.24046	3.7073	0.18505	3.66113	0.27664	3.1116	0.32136	3.33212	0.32728	3.2611	0.26941	3.38799
1	adult	3.65054	0.55338	3.76488	0.58485	3.62317	0.63348	3.29755	0.62009	3.60005	0.49469	3.41586	0.54973	3.3717	0.45177
1	adult	3.68122	0.54997	3.80138	0.58757	3.6765	0.59389	3.40347	0.56066	3.63233	0.49015	3.5569	0.53376	3.46146	0.47465
1	adult	0.23923	3.85983	0.30214	3.65007	0.21056	3.74185	0.37129	3.32691	0.39153	3.35985	0.42147	3.34223	0.32928	3.49034
1	hatchling	1.87611	0.44896	2.8381	0.50195	1.45917	0.41367	0.40788	0.50111	2.37167	0.38956	1.00242	0.50829	1.64511	0.41202
1	hatchling	0.37995	0.59627	0.38204	0.68777	0.35869	0.59676	0.56085	0.7348	0.40741	0.52277	0.96567	0.61609	0.50042	0.56524
1	hatchling	0.31253	0.60709	0.37055	0.66596	0.3364	0.60155	0.61326	0.85604	0.39565	0.59761	0.82344	0.60625	0.4656	0.53976
1	hatchling	0.209	3.76751	0.27935	3.91881	0.19077	3.65397	0.33218	3.29628	0.33647	3.37043	0.34482	3.29767	0.26937	3.46414
1	hatchling	0.23325	3.79308	0.24265	3.74616	0.21387	3.61635	0.29178	2.39161	0.28303	3.27311	0.43023	3.18116	0.30822	3.12799
1	adult	3.7576	0.54179	3.82381	0.56956	3.62894	0.56613	3.30186	0.54227	3.44817	0.50477	3.454	0.48658	3.35763	0.49039
1	adult	3.58711	0.53998	3.8433	0.61916	3.772	0.64122	3.20051	1.09943	3.59361	0.51467	3.53545	0.52618	3.40083	0.49721
1	adult	3.71522	0.60975	3.87123	0.56864	3.63814	0.67199	3.53857	0.56916	3.61143	0.47168	3.62982	0.60578	3.53703	0.5236
1	hatchling	2.22587	2.25882	2.49878	2.19907	2.47431	2.02601	2.23143	2.23832	2.39879	1.94814	2.27016	2.43648	2.05278	2.14216
1	hatchling	1.70703	2.13041	2.23059	2.09387	1.632	2.43864	0.64742	2.17969	0.29545	3.15533	1.66637	1.77458	0.31592	3.11632
1	hatchling	3.5549	0.55915	3.7809	0.63048	3.66856	0.66839	3.31695	0.54673	3.59872	0.51367	3.5017	0.55241	3.49408	0.50305
1	hatchling	0.21052	3.71557	0.2605	3.45159	0.18379	3.48862	0.35759	3.2992	0.37342	3.5515	0.31482	3.23199	0.24848	3.41096
1	hatchling	0.23548	3.71105	0.24502	3.60477	0.22384	3.52811	0.30261	2.01669	0.2894	3.12486	0.63205	1.99442	0.30151	2.66517
1	adult	3.80868	0.5953	3.9213	0.58549	3.525	0.66423	3.17403	0.80783	3.58484	0.53229	3.53862	0.53768	3.40992	0.47128
1	adult	3.60846	0.49194	3.69186	0.50477	3.40871	0.5263	2.87644	0.51323	3.40809	0.52174	3.20851	0.47439	2.95135	0.4585
1	adult	0.23284	3.72708	0.29139	3.73529	0.21027	3.68058	0.38822	3.49025	0.384	3.38952	0.47783	3.32249	0.30764	3.37594
1	hatchling	3.58865	0.56574	3.69604	0.5931	3.43979	0.71615	3.26479	0.60711	3.4656	0.51224	3.44021	0.57056	3.29049	0.50772
1	hatchling	3.74574	0.55182	3.76082	0.62214	3.37103	0.64391	3.2958	0.53586	3.5661	0.52481	3.4719	0.51473	3.51936	0.51793
1	hatchling	0.33651	0.59548	0.33147	0.61367	0.35457	0.55725	0.37597	0.5818	0.40268	0.55901	0.81619	0.57859	0.4316	0.55124
1	hatchling	0.22689	3.85778	0.30065	3.73812	0.22413	3.77811	0.40048	3.37647	0.38638	3.36054	0.54666	3.4517	0.30124	3.49756
1	hatchling	0.20022	3.6744	0.28086	3.61486	0.19837	3.79109	0.38908	3.44448	0.35855	3.48932	0.38486	3.32178	0.27507	3.39762
1	adult	3.49456	0.48198	3.68587	0.54197	3.45134	0.54248	3.14932	0.49904	3.45334	0.4905	3.36459	0.49306	3.07994	0.46433
1	adult	3.71997	0.59558	3.86293	0.57565	3.72859	0.67294	3.45404	0.62391	3.60439	0.50094	3.48951	0.60436	3.41807	0.49619
1	adult	0.2212	3.82113	0.29233	3.73156	0.20906	3.78655	0.35226	3.40341	0.38641	3.38634	0.43661	3.42491	0.31374	3.33669
1	hatchling	3.02284	0.53846	3.65303	0.56258	3.3497	0.56459	2.88097	0.60608	3.42901	0.5168	0.79389	0.44035	0.38073	0.44798
1	hatchling	1.24248	0.55162	1.0389	0.59648	0.3318	0.57978	0.47243	0.66146	0.54966	0.52951	0.65992	0.54589	0.47301	0.51886
1	hatchling	3.37076	0.56318	3.64826	0.56421	0.2972	0.45893	2.24903	0.4585	3.40851	0.48692	3.36838	0.50151	3.22956	0.49475
1	hatchling	0.31786	0.56062	0.35797	0.67069	0.34525	0.54891	0.43292	0.55895	0.41289	0.49841	0.98686	0.50879	0.49413	0.547
1	hatchling	0.34016	0.66082	0.37428	0.71757	0.33774	0.61968	0.39833	0.62873	0.39346	0.57613	0.94139	0.6081	0.50057	0.59624
1	hatchling	0.2943	0.59206	0.33033	0.6397	0.29633	0.55338	0.37578	0.57462	0.36829	0.55886	0.7754	0.57903	0.44227	0.59123
1	hatchling	3.74176	0.58082	3.86542	0.5908	3.75362	0.58633	3.25235	0.52801	3.58682	0.49121	3.51241	0.53489	3.42124	0.49211
1	adult	3.58023	0.48076	3.75986	0.5156	3.57829	0.40816	2.90177	0.43242	3.46714	0.47193	3.40263	0.48212	3.14126	0.46677
1	hatchling	3.61717	0.58422	3.72524	0.6634	3.57748	0.68151	3.24533	0.55633	3.57238	0.53537	3.51207	0.61156	3.32376	0.49719
1	hatchling	3.5488	0.56586	3.84233	0.58574	3.45462	0.54354	0.7033	0.53176	3.38669	0.54017	3.32027	0.54124	3.02287	0.50409
1	hatchling	3.43788	0.55811	3.84285	0.56242	3.40984	0.54604	2.41708	0.51942	3.52036	0.50291	3.52065	0.52604	3.2604	0.47571
1	hatchling	0.57996	0.5813	0.33959	0.5888	0.34273	0.549	0.69749	0.77897	0.40307	0.51974	1.06086	0.58305	0.72683	0.5298
1	hatchling	0.35533	0.62892	0.38572	0.73206	0.367	0.60589	0.58353	0.75435	0.40589	0.56921	0.91747	0.6298	0.46049	0.59501
1	hatchling	0.31913	0.69309	0.37383	0.73097	0.34779	0.63842	0.46971	0.74789	0.35651	0.58915	0.82421	0.64195	0.47916	0.62342
1	hatchling	3.47714	0.58375	3.64719	0.55425	3.44255	0.50611	2.78896	0.52163	3.31063	0.47076	3.16379	0.44523	2.98735	0.47398
1	adult	3.71679	0.59426	2.45021	2.32663	3.68972	0.61663	3.46597	0.55115	2.66918	1.74075	2.21539	2.38098	2.38957	1.68652
1	hatchling	0.35304	0.52477	3.80415	0.63237	3.02085	0.557	0.32971	0.51208	0.35506	0.42541	3.30964	0.53251	0.37908	0.43056
1	hatchling	3.63561	0.51162	3.81658	0.59432	3.58106	0.59602	2.48228	0.52214	3.41899	0.48351	3.51184	0.54275	3.24344	0.4844
1	hatchling	3.53203	0.54551	3.76619	0.60537	3.4936	0.56051	1.32353	0.454	3.3741	0.47353	3.25773	0.46293	3.19164	0.47452
1	hatchling	0.33294	0.61711	0.34814	0.64671	0.35235	0.52279	0.77842	0.93687	0.396	0.55824	1.00191	0.60225	0.46802	0.53682
1	hatchling	3.61233	0.60321	3.77824	0.59897	3.5659	0.57827	2.72126	0.50794	3.56757	0.52689	3.35456	0.49145	3.29199	0.4747
1	hatchling	3.26363	0.56611	3.25976	0.53965	3.04366	0.53658	0.57972	0.55236	3.18176	0.52137	2.47478	0.53026	2.71772	0.49165
1	hatchling	3.3201	0.52045	3.84291	0.60196	3.48013	0.54651	3.07851	0.5545	3.53325	0.53849	3.3133	0.4909	3.32291	0.50038
1	adult	3.75194	0.53265	3.59982	0.49328	3.62848	0.48176	2.94419	0.48451	3.52564	0.51012	3.25716	0.45312	3.0905	0.44015
1	hatchling	3.29884	0.54935	3.65162	0.59576	3.50251	0.73865	2.64373	0.53553	3.45438	0.52231	3.33812	0.52616	3.09344	0.48116
1	hatchling	3.48422	0.56732	3.69764	0.5835	3.58257	0.60095	2.91531	0.52107	3.58841	0.48658	3.27244	0.50073	3.32453	0.46034
1	hatchling	0.33617	0.59901	0.32604	0.6818	0.33716	0.60375	0.8151	0.91285	0.3857	0.54678	0.98926	0.59723	0.48961	0.54531
1	hatchling	0.38074	0.6073	0.40016	0.68925	0.37702	0.55692	0.71668	0.83473	0.40715	0.52864	0.99181	0.5805	0.50339	0.54451
1	hatchling	0.33439	0.62006	0.34252	0.71775	0.3251	0.5686	0.60297	0.82403	0.38108	0.51741	0.90455	0.63848	0.45248	0.56325
1	hatchling	3.49601	0.59961	3.71198	0.56248	3.37941	0.53023	2.00215	0.48419	3.40868	0.5106	3.36643	0.51852	3.1017	0.49904
1	hatchling	3.50247	0.57059	3.76687	0.5771	3.69215	0.55033	3.11446	0.73121	3.52309	0.56498	3.48807	0.51067	3.12093	0.47144
1	adult	3.82953	0.59127	3.93411	0.55521	3.73624	0.55788	2.91606	1.12165	3.68142	0.57139	3.55137	0.525	3.34183	0.49078
1	hatchling	3.35063	0.45852	3.72744	0.53698	3.45242	0.47873	2.73076	0.52928	3.42117	0.5066	3.17955	0.47397	2.99742	0.44245
1	hatchling	3.58	0.56017	3.77558	0.59647	3.51133	0.57645	2.78857	0.51318	3.39324	0.4966	3.47742	0.54232	3.30637	0.48706
1	hatchling	0.32301	0.60071	0.31584	0.60752	0.29425	0.49907	0.55811	0.65071	0.38963	0.51819	0.95925	0.53623	0.45342	0.51174
1	hatchling	0.32976	0.57785	0.36387	0.69142	0.33712	0.57388	0.62625	0.77435	0.40001	0.53152	0.92972	0.5529	0.49967	0.53268
1	hatchling	1.74246	0.51193	1.76766	0.54195	0.38512	0.57955	0.47219	0.6474	0.87542	0.4987	0.90478	0.62157	1.3785	0.47814
1	hatchling	3.52509	0.5619	3.61284	0.58593	3.48861	0.58489	2.85368	0.50455	3.35488	0.49666	3.23992	0.46584	3.2359	0.47258
1	adult	0.47086	0.94501	0.27348	0.43228	0.28745	0.4411	0.46472	0.52208	0.36745	0.42664	0.72939	0.38625	0.34903	0.37802
1	adult	3.79197	0.64919	3.78535	0.59436	3.65962	0.6853	3.2643	1.07966	3.56852	0.52367	3.62919	0.57113	3.47723	0.49648
1	hatchling	3.50859	0.51845	3.72293	0.56713	3.42058	0.6169	3.02277	0.57761	3.45265	0.48769	3.26642	0.53382	3.26392	0.49388
1	hatchling	3.64841	0.51875	3.60924	0.49807	3.5625	0.56096	2.9428	0.55107	3.58975	0.49687	3.57139	0.4896	3.25527	0.45083
1	hatchling	0.32199	0.58645	0.36932	0.62945	0.33006	0.50781	0.59061	0.7309	0.40019	0.48554	0.96042	0.55476	0.51274	0.53632
1	hatchling	0.35112	0.61443	0.36177	0.67951	0.34106	0.58594	0.60629	0.75159	0.41388	0.5484	0.97466	0.59773	0.5097	0.55375
1	hatchling	0.33004	0.43504	0.29587	0.36109	0.31329	0.39986	0.35985	0.41114	0.35885	0.37775	0.8775	0.44238	0.38029	0.35196
1	hatchling	3.48022	0.58662	3.78391	0.53274	3.56515	0.58523	3.28417	0.59549	3.60492	0.53237	3.46809	0.53427	3.26691	0.47246
1	adult	3.75979	0.6073	3.92583	0.59333	3.57823	0.61471	3.39884	0.56085	3.59004	0.50473	3.442	0.53611	3.24374	0.46382
1	adult	3.70695	0.61648	3.8905	0.60591	3.68561	0.60965	3.50409	0.66422	3.65453	0.51682	3.56123	0.65597	3.49356	0.5022
1	hatchling	3.72052	0.58856	3.73015	0.59866	3.49259	0.60876	3.19243	0.629	3.47863	0.56087	3.35161	0.52558	3.23923	0.47864
1	hatchling	3.47365	0.56013	3.59856	0.56686	3.61528	0.58479	2.85717	0.5169	3.47665	0.50154	3.33416	0.51699	3.11275	0.44977
1	hatchling	0.34396	0.63398	0.34065	0.69197	0.32916	0.57091	0.6253	0.78427	0.37706	0.5365	0.92478	0.58853	0.47945	0.5928
1	hatchling	3.04986	0.47319	3.21771	0.51762	2.74346	0.42339	0.4387	0.53664	2.9112	0.4559	2.24884	0.4417	2.38017	0.45144
1	hatchling	3.18303	0.5294	3.47156	0.59265	3.00457	0.47791	0.9052	0.47799	3.17522	0.50304	2.76851	0.48806	2.77881	0.50285
1	hatchling	2.94963	0.48813	3.53413	0.54668	3.04329	0.49177	0.45892	0.43737	3.22173	0.47191	2.90287	0.44423	2.69598	0.47508
1	adult	3.66542	0.5605	3.98485	0.58217	3.62033	0.56586	3.2913	0.49914	3.64323	0.50552	3.33165	0.53292	3.47668	0.47558
1	adult	3.57028	0.55201	3.76129	0.56501	3.5701	0.53844	3.31634	0.54837	3.62315	0.50375	3.4016	0.52977	3.22771	0.48751
1	hatchling	3.36147	0.50959	3.60027	0.57187	3.05962	0.54546	2.87841	0.50364	3.42089	0.51012	3.23308	0.47744	3.034	0.46479
1	hatchling	3.68421	0.53373	3.85081	0.60992	3.58227	0.64279	3.16864	0.58308	3.57134	0.53333	3.38046	0.50629	3.42512	0.47163
1	hatchling	0.32492	0.60657	0.32572	0.67487	0.32891	0.59412	0.66203	0.86357	0.39984	0.60213	0.96234	0.59057	0.48223	0.57193
1	hatchling	3.57113	0.52767	3.67303	0.57926	3.5148	0.57777	2.81687	0.54614	3.47247	0.50878	3.32361	0.5488	3.18865	0.49193
1	hatchling	3.49683	0.54497	3.71837	0.61202	3.49075	0.60234	2.8068	0.57559	3.57171	0.56152	3.27291	0.53186	3.16563	0.51978
1	hatchling	3.15364	0.95403	3.68152	0.57519	3.50326	0.56516	3.223	0.54839	3.5093	0.49805	3.30118	0.49583	3.43236	0.51682
1	adult	3.8098	0.57338	3.81812	0.56327	3.62056	0.56899	3.30272	0.56611	3.66074	0.49151	3.56716	0.52139	3.46419	0.46689
1	adult	3.84953	0.60863	3.84364	0.56382	3.71936	0.62754	3.51628	0.60994	3.62388	0.50255	3.63006	0.56665	3.54816	0.48459
1	hatchling	3.47608	0.49363	3.72409	0.62574	3.4227	0.71652	3.23005	0.62853	3.43081	0.52685	3.21799	0.54148	3.26033	0.47633
1	hatchling	3.52257	0.50749	3.71275	0.58588	3.3624	0.46869	2.8001	0.51856	3.64076	0.53076	3.32179	0.47429	3.31484	0.47955
1	hatchling	0.34793	0.57958	0.34421	0.67017	0.3424	0.58516	0.65628	0.74121	0.3872	0.51213	0.9649	0.54881	0.46196	0.52814
1	hatchling	0.3685	0.6234	0.40316	0.67726	0.36884	0.55813	0.70023	0.8242	0.41905	0.53399	1.00622	0.60547	0.51838	0.54699
1	hatchling	0.31954	0.63218	0.36224	0.76218	0.32988	0.65014	0.5776	0.81152	0.39042	0.57539	0.86304	0.68075	0.49312	0.64178
1	hatchling	3.72384	0.57547	3.80732	0.5702	3.42248	0.57453	2.99771	0.52283	3.4903	0.55248	3.44491	0.56561	3.1985	0.48577
1	adult	3.60327	0.53786	3.69004	0.53946	3.45587	0.53136	3.10422	0.55117	3.36051	0.4845	3.43105	0.49602	3.22794	0.4934
1	adult	3.96044	0.62118	3.76069	0.5907	3.57695	0.71687	3.44254	0.69358	3.75964	0.56789	3.74744	0.62632	3.4867	0.52354
1	hatchling	3.69592	0.4945	3.8223	0.63181	3.52614	0.56403	3.32962	0.5265	3.44318	0.53845	3.50366	0.52168	3.24321	0.48512
1	hatchling	3.56001	0.50743	3.67849	0.55502	3.46687	0.51496	3.00229	0.47729	3.71788	0.52082	3.37258	0.47708	3.28915	0.46114
1	hatchling	0.32963	0.58769	0.35902	0.6792	0.34742	0.58237	0.60059	0.76662	0.40081	0.55446	0.95999	0.54627	0.4658	0.51315
1	hatchling	0.3181	0.64964	0.33786	0.64354	0.31757	0.55699	0.54953	0.72823	0.39769	0.52719	0.8889	0.57629	0.49994	0.59537
1	hatchling	3.58764	0.53038	3.70166	0.60873	3.57001	0.6452	3.08944	0.55768	3.53888	0.51871	3.27627	0.53542	3.347	0.50048
1	hatchling	3.53343	0.57659	3.77375	0.59484	3.41749	0.53057	3.19467	0.54439	3.4641	0.49397	3.44789	0.47317	3.32902	0.48733
1	adult	3.79439	0.56728	3.88574	0.56648	3.56864	0.63373	3.42866	0.53708	3.67305	0.49096	3.51623	0.53833	3.27647	0.48224
1	adult	3.74475	0.6228	3.87223	0.57623	3.58219	0.68649	3.60149	0.58803	3.57781	0.48012	3.51336	0.56074	3.51276	0.48257
1	hatchling	3.60359	0.53153	3.67867	0.62095	3.44271	0.5826	3.00497	0.60611	3.2557	0.59249	3.27812	0.5365	3.11088	0.52522
1	hatchling	3.29798	0.92474	3.65365	0.6144	3.53725	0.76864	3.41306	0.6962	3.52486	0.52604	3.51308	0.55036	3.47018	0.49788
1	hatchling	0.37149	0.63492	0.34297	0.63304	0.32964	0.59769	0.40544	0.60305	0.40363	0.53245	0.9947	0.56325	0.47715	0.59142
1	hatchling	0.34915	0.63495	0.34667	0.69518	0.34953	0.54898	0.41455	0.57965	0.4209	0.55022	1.00508	0.55484	0.49387	0.52536
1	hatchling	3.39253	0.81677	3.87457	0.57628	3.58428	0.54545	3.1644	0.6691	3.5648	0.48265	3.41508	0.475	3.31766	0.44472
1	hatchling	3.57091	0.54496	3.62358	0.56346	3.90235	0.61578	3.1178	0.59793	3.35785	0.52635	3.12825	0.50328	3.13018	0.50998
1	adult	3.6545	0.48279	3.6931	0.5254	3.63979	0.48858	3.32549	0.49624	3.52685	0.52547	3.49735	0.52319	3.13995	0.42895
1	adult	3.79538	0.59294	3.86974	0.56889	3.57702	0.59877	3.45232	0.532	3.61944	0.50322	3.64974	0.57639	3.47321	0.48158
1	hatchling	0.37261	0.62792	0.38656	0.58169	0.33184	0.60187	0.41823	0.6319	0.44951	0.57862	0.98442	0.68801	0.47056	0.56323
1	hatchling	3.68863	0.54394	3.75938	0.64282	3.46463	0.71191	3.39588	0.63384	3.41758	0.4978	3.48754	0.64711	3.38251	0.48967
1	hatchling	2.66274	0.6783	0.81059	0.62549	0.33064	0.56729	1.82744	0.5254	0.40407	0.5828	0.967	0.57805	0.6357	0.57719
1	hatchling	3.28706	0.6	3.41565	0.54038	3.08682	0.51449	2.1128	0.49819	2.85875	0.44812	2.73688	0.44709	2.70038	0.46418
1	hatchling	3.60697	0.5433	3.76758	0.57367	3.36654	0.60732	3.07513	0.60964	3.68267	0.55886	3.31908	0.54006	3.20246	0.48181
1	hatchling	3.60451	0.5448	3.66551	0.66362	3.56756	0.79076	3.49753	0.66254	3.52675	0.51542	3.40015	0.6589	3.32422	0.49071
1	adult	3.52272	0.52154	3.83136	0.61591	3.55844	0.6242	3.1856	0.71573	3.45678	0.5183	3.47836	0.52289	3.36971	0.45024
1	adult	3.83942	0.58513	3.9984	0.60305	3.54238	0.68354	3.40427	0.59378	3.57142	0.52565	3.43177	0.59891	3.33596	0.56757
1	hatchling	2.09814	0.48431	1.07674	0.57262	0.40048	0.61452	0.50196	0.72081	0.45729	0.56513	1.04887	0.66217	1.25172	0.51209
1	hatchling	0.22493	3.72679	0.28321	3.5913	0.19395	3.49924	0.31953	3.29892	0.36436	3.33269	0.5138	3.28714	0.26108	3.23199
1	hatchling	0.33466	0.62403	0.36598	0.66715	0.37202	0.60516	0.43838	0.65342	0.40364	0.56571	1.01131	0.58465	0.50914	0.55298
1	hatchling	2.10555	0.48517	2.43215	0.51767	1.37225	0.4578	0.66397	0.50852	2.31931	0.4525	2.21239	0.48314	1.73734	0.45283
1	hatchling	0.34585	0.6126	0.39076	0.67974	0.36152	0.6215	0.41602	0.58482	0.42922	0.55862	1.00214	0.60273	0.5125	0.57296
1	hatchling	0.29423	0.61972	0.33142	0.70467	0.32742	0.58983	0.38287	0.62432	0.37009	0.52871	0.93969	0.561	0.44733	0.57741
1	hatchling	0.24312	3.75545	0.25471	3.66168	0.22571	3.4328	0.29727	3.01912	0.29402	3.27164	1.1128	0.52464	0.32519	2.86707
1	hatchling	3.45132	0.46848	3.4466	0.47538	2.8158	0.39665	1.52635	0.47615	3.33249	0.46301	2.67807	0.39032	2.70594	0.42984
1	hatchling	2.75218	0.47715	3.71743	0.54664	3.55147	0.6296	2.54439	0.51985	3.33528	0.4989	3.062	0.53486	2.952	0.46555
1	hatchling	0.28827	2.2902	0.24672	3.21691	0.33114	1.1574	0.60273	0.7787	0.33952	1.26354	0.90872	0.57204	0.40578	1.37208
1	hatchling	0.31144	0.65054	0.33981	0.8367	0.33311	0.6197	0.68945	1.05593	0.36013	0.57493	0.862	0.67814	0.43246	0.5889
1	hatchling	0.36054	0.73775	0.39286	0.85317	0.3718	0.74528	0.63979	0.93488	0.38338	0.69511	0.72632	0.80033	0.47124	0.75369
1	hatchling	0.25374	3.61414	0.26343	3.53417	0.24718	3.67196	0.41626	0.57069	0.31988	3.22869	0.51764	2.93935	0.36369	2.73528
1	hatchling	0.25151	3.42725	0.26481	2.96039	0.25983	2.82438	0.42342	0.63943	0.33791	2.77698	0.71724	1.86264	0.36393	2.24898
1	hatchling	0.20321	3.71111	0.27181	3.70228	0.18846	3.42103	0.30979	3.46007	0.35415	3.35331	0.3733	3.30972	0.26901	3.39438
1	adult	3.83879	0.56399	3.87773	0.54908	3.79832	0.56442	3.39391	0.53276	3.57083	0.51314	3.44892	0.52197	3.33488	0.46093
1	hatchling	3.08901	0.55219	3.4217	0.58574	3.22996	0.61488	1.57045	0.54434	3.04526	0.51596	2.66029	0.48567	2.92561	0.50266
1	hatchling	0.24284	3.44257	0.23981	3.50433	0.24628	2.40932	0.54675	0.69901	0.30291	3.01886	0.73322	1.38964	0.35147	2.46114
1	hatchling	0.30361	0.58599	0.31276	0.57976	0.296	0.50524	0.69598	0.75732	0.36355	0.45384	0.95904	0.50519	0.47496	0.54771
1	hatchling	0.34017	0.59701	0.35829	0.65051	0.36469	0.60386	0.82299	0.9246	0.40222	0.51702	0.98346	0.58731	0.49358	0.53249
1	hatchling	0.36783	0.63736	0.39527	0.61663	0.36395	0.54593	0.80178	0.85031	0.41626	0.50925	0.99674	0.62866	0.45321	0.52408
1	hatchling	0.22178	3.387	0.26993	3.63811	0.2397	3.43353	0.46126	0.61911	0.30096	2.98684	0.50163	2.9263	0.34716	2.41711
1	hatchling	0.32803	0.63314	0.36708	0.89693	0.33221	0.58486	0.52436	0.70122	0.41135	0.53965	0.9737	0.64498	0.53005	0.62603
1	adult	3.78911	0.59142	3.79539	0.55252	3.73899	0.60026	3.29292	0.9389	3.54616	0.51956	3.47935	0.58942	3.43705	0.4575
1	hatchling	3.41424	0.63147	3.61792	0.70157	3.33554	0.97208	3.22894	0.68856	3.42045	0.54466	3.25389	0.62858	3.35231	0.53084
1	hatchling	0.23068	3.7386	0.26426	3.59925	0.19335	3.44764	0.27437	2.91789	0.33996	3.26395	0.31821	3.17751	0.27558	3.32221
1	hatchling	0.20364	3.53133	0.26924	3.56024	0.20726	3.54021	0.27704	3.05313	0.34855	3.38967	0.33786	3.2918	0.25776	3.21719
1	hatchling	0.34062	0.62273	0.3511	0.64078	0.36022	0.5644	0.74158	0.93481	0.39301	0.55835	0.98535	0.61749	0.50842	0.55281
1	hatchling	0.19962	3.58531	0.2484	3.78687	0.19342	3.51759	0.2677	3.04336	0.32678	3.30052	0.37887	3.3503	0.26352	3.38555
1	hatchling	0.19417	3.63326	0.22842	3.40642	0.19348	3.35712	0.25195	3.02302	0.31481	3.3546	0.30248	3.36207	0.2637	3.17208
1	hatchling	2.26334	0.48418	1.49129	0.49646	0.34333	0.48428	0.35401	0.50796	0.32178	0.7934	0.8795	0.45849	0.37048	0.43634
1	adult	3.79967	0.54846	4.01417	0.57584	3.62117	0.51961	3.24817	0.53392	3.47448	0.48644	3.58003	0.53479	3.30081	0.47172
1	hatchling	0.36174	0.91758	0.26527	3.07486	0.26041	2.45004	0.44385	0.61571	0.30134	2.60692	0.95497	0.59481	0.4001	1.43648
1	hatchling	0.21119	3.53628	0.26977	0.46689	0.19988	3.15442	0.27762	1.78605	0.33529	3.37271	0.31378	3.31118	0.23967	3.01369
1	hatchling	0.33808	0.69342	0.36589	0.70873	0.35747	0.63402	0.67413	0.86753	0.3702	0.54546	0.90269	0.7001	0.45833	0.61144
1	hatchling	0.34058	0.70172	0.36469	0.79361	0.3454	0.68155	0.54123	0.83203	0.39216	0.65011	0.75912	0.72425	0.43595	0.65416
1	hatchling	0.2059	3.50284	0.22901	3.61838	0.18921	3.46813	0.26665	2.88626	0.2992	3.19126	0.29393	3.27702	0.25997	3.15854
1	hatchling	0.28392	0.57159	0.32955	0.6709	0.31355	0.60453	0.53616	0.69225	0.35043	0.52564	0.92139	0.56135	0.44279	0.53234
1	hatchling	1.53106	0.48843	1.32136	0.48587	0.29908	0.45783	0.36725	0.51533	1.83273	0.42865	0.66137	0.52007	1.41415	0.41914
1	adult	3.69969	0.53932	4.03252	0.63837	3.69053	0.56076	3.40837	0.73873	3.70054	0.52974	3.52925	0.49829	3.46073	0.4573
1	hatchling	0.29327	3.65009	0.56571	3.34038	0.225	3.62182	0.58495	3.30791	0.45804	3.15133	0.66832	3.1774	0.34722	3.38188
1	hatchling	0.21748	3.64169	0.22763	3.63395	0.19341	3.48745	0.28877	2.45495	0.29848	3.23835	0.33242	3.27812	0.29158	3.08169
1	hatchling	0.31635	0.57956	2.23518	0.49206	0.36011	0.51668	0.5338	0.70807	0.36602	0.49721	1.46902	0.45484	1.40026	0.44978
1	hatchling	0.23307	3.53995	0.24062	3.65645	0.22012	3.49395	0.37673	0.80494	0.27406	3.019	0.36959	3.15079	0.30342	3.03601
1	hatchling	0.23997	3.63708	0.24932	3.50141	0.21905	3.35752	0.45906	0.64182	0.30907	2.86284	0.57065	2.65806	0.32029	2.6503
1	hatchling	0.22624	3.46423	0.24143	3.30606	0.22172	3.49751	0.39898	0.59147	0.29321	3.1616	0.55016	2.8105	0.30824	2.5671
1	hatchling	3.36292	0.56431	3.6307	0.54349	3.39583	0.52038	2.76188	0.49844	3.47892	0.49187	3.26924	0.50096	3.05785	0.4725
1	adult	3.77826	0.51947	3.89688	0.56797	3.76069	0.58012	3.36785	0.55909	3.62025	0.46366	3.57087	0.54119	3.41406	0.4967
1	hatchling	0.27147	3.27169	0.31421	0.54758	0.53476	0.53627	0.37277	0.93854	0.35218	0.41779	0.95087	0.49288	0.31188	2.60152
1	hatchling	0.21711	3.50766	0.21807	3.46535	0.21625	3.49723	0.34071	1.17131	0.29685	3.31071	0.44136	3.09345	0.29191	2.97563
1	hatchling	0.22887	3.81856	0.24191	3.51776	0.21495	3.59762	0.30351	3.03672	0.30509	3.20022	0.32009	3.29038	0.26269	3.0805
1	hatchling	3.53477	0.59466	3.54117	0.57398	3.38419	0.61895	2.69713	0.57838	3.37968	0.49883	3.32718	0.56741	3.0681	0.48142
1	hatchling	0.21438	3.76644	0.26577	3.69539	0.19628	3.5983	0.30425	3.41215	0.34067	3.39514	0.39495	3.26759	0.28568	3.33968
1	hatchling	0.29754	0.5962	0.34063	0.70436	0.32392	0.56465	0.51498	0.70041	0.36343	1.214	0.97908	0.5901	0.46885	1.20379
1	hatchling	3.49802	0.50614	3.70439	0.54283	3.50976	0.4728	2.86045	0.50031	3.42718	0.45568	3.3805	0.4908	3.14729	0.4604
1	adult	3.87618	0.57099	3.84101	0.60139	3.69556	0.64626	3.62294	0.55352	3.70994	0.51613	3.61309	0.5655	3.57591	0.49876
1	hatchling	0.24724	3.49352	0.3781	3.39988	0.19031	3.39971	0.47923	3.25961	0.35167	0.43602	0.39624	3.25353	0.33996	0.43187
1	hatchling	0.26965	1.58266	0.24429	3.13675	0.30855	0.97891	0.44569	0.68017	0.31736	1.76158	0.89906	0.55506	0.39087	1.71815
1	hatchling	0.31836	0.57682	0.30159	0.58381	0.26281	1.91906	0.42336	0.5721	0.36078	0.45057	0.64403	2.03107	0.34372	2.40157
1	hatchling	0.33282	0.61481	0.34562	0.64192	0.3066	0.57138	0.59585	0.75415	0.38734	0.53142	0.96972	0.60792	0.49195	0.57612
1	hatchling	0.23746	3.4565	0.25574	3.52967	0.23972	3.40313	0.44659	0.65262	0.31094	2.71616	0.64408	2.22086	0.3504	2.58383
1	hatchling	0.21933	3.70006	0.22416	3.58502	0.21635	3.68777	0.28516	3.34899	0.29931	3.43184	0.31329	3.297	0.28977	3.28831
1	hatchling	3.27319	0.48149	3.43418	0.53303	3.14051	0.50131	2.37276	0.48968	3.30074	0.48926	3.15869	0.49159	2.80712	0.47565
1	adult	3.78699	0.57999	3.90366	0.60587	3.5851	0.66135	3.40391	0.55159	3.49421	0.47945	3.54165	0.54387	3.39561	0.45926
1	hatchling	0.25742	3.58419	0.40076	3.46808	0.2164	3.4864	0.5108	3.28868	0.44543	3.04187	0.56974	3.24771	0.35751	3.29063
1	hatchling	0.21134	3.62328	0.29487	3.94125	0.1979	3.55311	0.36689	3.16767	0.41722	3.27423	0.33401	3.27617	0.2782	3.27564
1	hatchling	2.85333	0.46339	3.54795	0.57167	2.75124	0.45364	0.4685	0.52253	3.08803	0.47427	2.84929	0.47676	2.69682	0.44258
1	hatchling	0.27693	3.57312	0.22956	3.66197	0.20829	3.45722	0.33417	1.31704	0.29439	3.41476	0.35741	3.39464	0.27625	3.06544
1	hatchling	0.22524	3.81067	0.20842	3.5795	0.21074	3.37107	0.32778	1.27009	0.28843	3.34227	0.3633	3.18551	0.27526	3.12406
1	hatchling	0.20688	3.63817	0.23294	3.6703	0.18608	3.61642	0.31396	3.19833	0.37319	3.35019	0.3108	3.34363	0.25234	3.15147
1	hatchling	3.59704	0.49374	3.65478	0.55144	3.50807	0.49953	3.08565	0.52463	3.57667	0.48791	3.54458	0.48117	3.20729	0.43006
1	adult	3.79445	0.52049	3.79676	0.52259	3.58686	0.53216	3.16883	0.52066	3.50469	0.52003	3.45396	0.50517	3.10801	0.45962
1	hatchling	0.34442	0.67016	0.36289	0.70364	0.33581	0.58683	0.44521	0.64188	0.42873	0.59174	0.96606	0.67513	0.49584	0.57351
1	hatchling	0.33222	0.5228	0.2305	3.73001	0.20034	3.27218	0.3159	0.4625	0.3589	0.43233	0.80744	0.46125	0.27356	3.45641
1	hatchling	0.21982	3.50676	0.23775	3.6324	0.19947	3.54439	0.28457	2.84327	0.30331	3.29912	0.33933	3.32335	0.28129	3.11585
1	hatchling	0.23555	3.64691	0.24768	3.46528	0.24243	3.07049	0.41884	0.56576	0.288	2.73476	0.57802	2.79287	0.32682	2.58133
1	hatchling	0.24415	3.68093	0.25379	3.44835	0.23786	3.40335	0.41395	0.64708	0.29034	2.57594	0.68484	1.92611	0.31553	2.54822
1	hatchling	0.217	3.84676	0.28407	3.63404	0.19496	3.7735	0.37294	3.33232	0.36072	3.329	0.33776	3.43446	0.25773	3.3982
1	hatchling	1.42859	2.31509	1.57701	2.49983	1.49673	2.17399	1.09664	1.94153	1.93224	1.56082	1.6157	1.84896	1.32263	1.60251
1	adult	3.62599	0.4773	3.83157	0.53174	3.69799	0.55335	3.2441	0.50693	3.55688	0.50224	3.4167	0.49629	3.27608	0.46904
1	hatchling	0.26637	3.61937	0.34785	3.53025	0.21396	3.65403	0.44928	3.32094	0.381	3.2602	0.46316	3.21807	0.34756	3.29386
1	hatchling	0.21321	3.55784	0.23298	3.6151	0.20237	3.51166	0.2979	3.31972	0.29561	3.2231	0.32691	3.21058	0.28525	3.21234
1	hatchling	0.3485	0.63214	0.36591	0.72858	0.33934	0.55661	0.45891	0.69237	0.40965	0.58427	0.95856	0.60855	0.51023	0.57391
1	hatchling	0.35568	0.54572	0.35143	0.59261	0.3498	0.51617	0.43837	0.59381	0.39218	0.4999	0.92056	0.51078	0.47055	0.48741
1	hatchling	0.31927	0.58196	0.33707	0.65222	0.31096	0.56854	0.44131	0.61737	0.40411	0.53004	0.99482	0.58725	0.46657	0.55187
1	hatchling	1.88074	1.36867	0.25317	2.94343	0.29555	1.05253	0.53923	0.67764	0.30057	2.04841	0.86797	0.87494	0.66471	1.49263
1	hatchling	0.32672	0.64682	0.33939	0.6924	0.31406	0.59812	0.35875	0.55661	0.3784	0.59321	0.84823	0.58532	0.42636	0.53996
1	adult	3.75064	0.59547	3.83547	0.58391	3.66487	0.62802	3.44065	0.5594	3.50609	0.49163	3.50626	0.59816	3.39403	0.45776
1	hatchling	0.38298	0.71558	0.35686	0.6832	0.39831	0.66238	0.4491	0.68108	0.44237	0.58853	1.03341	0.69148	0.54222	0.62297
1	hatchling	0.39503	0.68644	0.37957	0.66206	0.34801	0.61658	0.45741	0.67504	0.3939	0.57694	1.01841	0.6066	0.47802	0.57063
1	hatchling	2.95046	0.47673	3.16706	0.48523	2.69847	0.4879	1.91573	0.48997	1.58486	0.42269	1.49736	0.56313	2.31502	0.44984
1	hatchling	3.12405	0.54942	3.47211	0.54808	3.28239	0.47397	2.25479	0.44643	3.1599	0.4576	2.93293	0.45136	2.74897	0.44279
1	hatchling	0.22277	3.74403	0.276	3.90845	0.20797	3.67787	0.32872	3.32811	0.31432	3.19128	0.33373	3.28492	0.29976	3.39482
1	hatchling	0.19607	3.66627	0.34376	3.59112	0.18943	3.52333	0.73987	3.25639	0.40358	3.35625	0.44323	3.41051	0.27813	3.33562
1	hatchling	0.28432	0.59372	0.30347	0.62363	0.27431	0.56141	0.33762	0.57261	0.3462	0.54621	0.76411	0.59988	0.44694	0.53597
1	adult	3.71667	0.55973	3.70869	0.58235	3.56482	0.6731	3.55531	0.64737	3.623	0.53246	3.46427	0.59549	3.45402	0.50766
1	hatchling	0.32023	0.58414	0.29859	0.57895	0.30343	0.59789	0.33779	0.58692	0.33918	0.50538	0.78064	0.57718	0.41079	0.54116
1	hatchling	0.28474	0.62933	0.32459	0.72024	0.2998	0.61935	0.42848	0.69374	0.40714	0.61641	0.83721	0.61404	0.45121	0.64846
1	hatchling	0.38389	0.79137	0.37071	0.65033	0.37004	0.59461	0.6134	0.80478	0.40141	0.55659	0.96514	0.60926	0.51246	0.60706
1	hatchling	0.28045	0.58522	0.29478	0.62286	0.30008	0.57427	0.41004	0.66112	0.3461	0.54781	0.84732	0.56716	0.42241	0.57614
1	hatchling	0.29663	0.55586	0.28741	0.41717	0.3084	0.42283	0.29293	1.39166	0.34446	0.39102	0.44916	0.44702	0.37149	0.39631
1	hatchling	0.25087	3.57595	0.25064	3.27825	0.28939	2.88979	0.35574	0.44352	0.30261	2.82205	0.52961	2.03885	0.31589	2.33133
1	hatchling	0.41544	1.18269	0.54815	1.29906	0.36929	0.53765	0.4093	0.47724	1.21661	1.21694	0.90244	0.53816	0.71062	0.96977
1	adult	3.73118	0.52749	3.76859	0.54647	3.71835	0.52362	3.30443	0.60318	3.64259	0.50303	3.504	0.49902	3.33648	0.43741
1	hatchling	0.30983	1.59041	0.26931	3.01299	0.2733	2.81766	0.41307	0.59222	0.32031	2.50845	0.95148	0.60372	0.3245	2.99618
1	hatchling	0.25966	0.53905	0.28277	0.61403	0.26499	0.46028	0.55195	0.73031	0.30591	0.46537	0.83063	0.51375	0.39526	0.52005
1	hatchling	0.35626	0.57359	0.35822	0.64559	0.35162	0.51684	0.7859	0.87792	0.41662	0.54002	0.9628	0.58174	0.48437	0.51583
1	hatchling	0.34697	0.53486	0.34635	0.56337	0.33392	0.5258	0.5318	0.67079	0.37755	0.51125	0.7962	0.56304	0.4255	0.46251
1	hatchling	0.26785	3.45426	0.26116	3.30864	0.25794	3.33779	0.41906	0.484	0.31502	2.75327	0.52235	2.21576	0.33623	2.47218
1	hatchling	0.29631	0.53323	0.3093	0.60222	0.30834	0.48035	0.57032	0.70405	0.35417	0.46193	0.96495	0.55432	0.41953	0.47662
1	hatchling	0.3496	0.63122	0.55405	0.62083	0.35077	0.59357	0.41495	0.61328	0.63321	0.50156	0.95181	0.61047	0.59642	0.51897
1	adult	3.85374	0.591	3.80467	0.53139	3.66501	0.45773	3.43759	0.54078	3.52366	0.5042	3.54012	0.51456	3.3149	0.49243
1	hatchling	0.35558	0.56229	0.2741	2.20036	0.29359	1.55779	0.42055	0.58205	0.34893	1.86755	0.95254	0.52777	0.32204	2.98463
1	hatchling	0.32874	0.72969	0.33525	0.69492	0.30818	0.58906	0.70664	1.01818	0.35117	0.59671	0.86531	0.66015	0.4475	0.61574
1	hatchling	0.32525	0.54381	0.36876	0.60439	0.34577	0.51062	0.88488	0.96859	0.3927	0.46746	0.99295	0.55244	0.47517	0.50684
1	hatchling	0.36324	0.58349	0.34759	0.6353	0.32408	0.54435	0.84356	0.98339	0.38646	0.55815	0.99732	0.61331	0.50422	0.54162
1	hatchling	0.3994	0.8212	0.40142	0.89731	0.39867	0.82333	0.6232	0.92676	0.40117	0.81151	0.65908	0.89976	0.47319	0.73879
1	hatchling	0.39211	0.55087	0.39614	0.65341	0.41057	0.54507	0.62954	0.70185	0.43378	0.492	0.9265	0.60148	0.50845	0.55905
1	adult	3.69067	0.54007	3.79842	0.54956	3.58539	0.53014	3.15487	0.50942	3.5614	0.49802	3.4048	0.47401	3.37151	0.45
1	adult	3.66471	0.57669	3.81981	0.55547	3.66355	0.57015	3.4482	0.52296	3.61451	0.47788	3.68884	0.613	3.47563	0.49241
1	hatchling	0.27414	3.55674	0.29742	3.51862	0.22783	3.59249	0.32362	3.23365	0.32687	3.17371	1.03356	2.66607	0.52812	3.12853
1	hatchling	0.21226	3.59215	0.23796	3.5451	0.20526	3.49954	0.30598	2.34427	0.28418	3.258	0.31463	3.16818	0.27374	3.26264
1	hatchling	0.23172	3.54002	0.22868	3.35163	0.23433	3.48019	0.48408	0.6533	0.3124	3.11668	0.5143	3.01825	0.32855	2.55911
1	hatchling	0.34751	0.52165	0.318	0.55571	0.32775	0.51186	0.51701	0.62944	0.38801	0.50707	0.88286	0.49482	0.41146	0.46153
1	hatchling	3.17186	0.45906	3.27644	0.46302	3.01746	0.40133	0.35502	0.4743	2.83443	0.43334	2.52179	0.40984	2.47795	0.39937
1	hatchling	0.28898	0.52502	0.31667	0.63718	0.33309	0.55588	0.61897	0.76171	0.37286	0.49442	0.94628	0.54521	0.44414	0.55153
1	adult	3.687	0.5742	3.84267	0.59396	3.62216	0.5875	3.1583	0.50819	3.53668	0.49244	3.47505	0.50054	3.30153	0.44442
1	adult	3.63689	0.59026	3.86448	0.58296	3.65431	0.60099	3.30893	0.85457	3.56694	0.5489	3.5522	0.54568	3.25927	0.44247
1	hatchling	0.27948	3.60549	0.39811	3.43952	0.21191	3.34353	0.57161	3.11573	0.44401	3.04426	0.71137	3.24081	0.37013	3.3629
1	hatchling	0.27205	0.5898	0.27468	0.61534	0.28427	0.55858	0.47325	0.72816	0.32523	0.51914	0.7554	0.56398	0.39492	0.53563
1	hatchling	0.27767	0.62697	0.27647	0.63538	0.33438	0.52716	0.47373	0.72632	0.31413	0.50203	0.76293	0.59325	0.36862	0.53543
1	hatchling	0.36913	0.54876	0.36516	0.57073	0.36162	0.51998	0.64111	0.71968	0.39932	0.51459	0.95359	0.50999	0.4861	0.48446
1	hatchling	3.63876	0.57334	3.66695	0.58384	3.36034	0.57912	1.73395	0.50485	3.35286	0.52273	3.16404	0.50421	2.92168	0.48502
1	hatchling	2.00396	2.18672	0.81942	1.8693	1.76183	2.13958	0.69952	1.10207	2.14357	1.63313	1.48214	2.31087	1.55903	1.65832
1	adult	3.83666	0.53734	3.8124	0.55283	3.44759	0.55091	3.23858	0.52664	3.684	0.52981	3.62032	0.54004	3.38552	0.50163
1	adult	3.55915	0.48609	3.79336	0.51724	3.66606	0.52448	3.06272	0.51308	3.49023	0.46744	3.37141	0.44662	3.17422	0.42588
1	hatchling	0.3961	0.65179	0.38707	0.65699	0.36545	0.59033	0.43926	0.6122	0.44832	0.58091	0.93531	0.62783	0.51426	0.54739
1	hatchling	0.31322	0.60836	0.33921	0.66609	0.33038	0.54915	0.47177	0.66445	0.35544	0.51156	0.87937	0.58011	0.44699	0.53053
1	hatchling	0.35886	0.53903	0.375	0.59411	0.34699	0.50087	0.52949	0.5856	0.39964	0.47584	0.97238	0.54831	0.47036	0.49224
1	hatchling	0.41802	0.56349	0.40241	0.48459	0.40472	0.44514	0.43729	0.47927	0.43378	0.43088	0.8447	0.37135	0.45398	0.42455
1	hatchling	0.38828	0.57742	0.39088	0.64047	0.37577	0.53857	0.66072	0.76562	0.42894	0.50882	0.92771	0.55274	0.49888	0.50449
1	hatchling	0.30302	0.51723	0.31721	0.58236	0.33125	0.55688	0.49893	0.6081	0.36559	0.46944	1.00037	0.53209	0.46355	0.47751
1	adult	3.6639	0.53077	3.6828	0.56115	3.69927	0.57171	3.22517	0.53908	3.45555	0.47653	3.47345	0.49902	3.11787	0.43791
1	adult	3.73758	0.50167	3.8466	0.60578	3.77831	0.59851	3.45101	0.56075	3.53237	0.50671	3.52297	0.57172	3.3268	0.47375
1	hatchling	0.36649	0.6076	0.34484	0.6215	0.3383	0.57526	0.43294	0.63708	0.39921	0.54688	0.9539	0.6466	0.47648	0.54224
1	hatchling	0.27429	0.56968	0.28008	0.57958	0.28246	0.48669	0.35135	0.55369	0.2262	0.36524	0.79006	0.54543	0.39629	0.52461
1	hatchling	0.25895	3.00907	0.25217	2.51009	0.29681	0.56738	0.44761	0.63717	0.31239	2.2124	0.86997	0.61956	0.35432	1.81198
1	hatchling	2.80128	0.451	0.29436	0.42767	0.30389	0.37491	0.34955	0.45736	0.36435	0.37564	0.82972	0.43301	0.35328	0.38017
1	hatchling	0.29688	0.42604	0.30642	0.52351	0.28839	0.45392	0.35941	0.52821	1.09529	0.40865	0.89341	0.48418	0.39264	0.46677
1	hatchling	0.32925	0.62048	0.34817	0.66305	0.36027	0.58721	0.52064	0.73841	0.39392	0.56616	0.86655	0.58537	0.46233	0.52558
1	adult	3.66678	0.64293	3.70584	0.57615	3.70368	0.5688	3.34806	0.50094	3.6798	0.53527	3.47253	0.52232	3.36869	0.4968
1	adult	3.6463	0.53023	3.87867	0.5435	3.66746	0.61493	3.35315	0.56957	3.57907	0.49304	3.29071	0.48855	3.32973	0.46191
1	hatchling	0.25334	3.55902	0.38491	3.49793	0.19131	3.4539	0.57678	3.1824	0.49788	3.21102	0.47442	2.96161	0.3198	3.24881
1	hatchling	0.24443	3.55214	0.23918	3.57605	0.21754	3.30729	0.40686	0.60298	0.29448	3.08049	0.48547	3.08618	0.3041	2.56584
1	hatchling	0.49254	0.77797	0.27904	0.64669	0.27119	0.52632	0.48097	0.6971	0.3514	0.54724	0.74802	0.59147	0.42995	0.55241
1	hatchling	0.51872	1.10476	0.27974	0.45153	0.29203	0.37717	0.34353	0.47505	0.33331	0.38178	0.29959	3.29617	0.36783	0.39235
1	hatchling	3.57029	0.46067	3.57151	0.51361	3.3778	0.42874	1.23609	0.44288	3.36887	0.45159	3.06473	0.47081	2.88353	0.4173
1	hatchling	3.73996	0.53071	3.68055	0.57896	3.54193	0.57502	3.15476	0.56204	3.42703	0.48688	3.49358	0.53877	3.35724	0.50256
1	adult	3.65436	0.52773	3.8928	0.58508	3.58906	0.51948	3.21769	0.52486	3.62574	0.52992	3.56408	0.53411	3.23609	0.4984
1	adult	3.70206	0.5742	3.84608	0.56547	3.69473	0.60317	3.45772	0.8301	3.59489	0.5435	3.45254	0.52601	3.44178	0.47449
1	hatchling	0.25459	3.51168	0.33221	3.42591	0.21087	3.53281	0.35043	3.22065	0.36574	3.21584	0.40368	3.22532	0.32904	3.24981
1	hatchling	0.29835	0.52729	0.2994	0.58041	0.3062	0.48865	0.46704	0.62962	0.36777	0.49338	0.89185	0.5632	0.47135	0.5572
1	hatchling	0.21176	3.52707	0.22743	4.01656	0.20288	3.68114	0.28387	2.23791	0.28166	3.26346	0.30746	3.44328	0.2705	3.23717
1	hatchling	2.67597	0.40132	2.43274	0.77001	1.81979	0.37778	0.41809	0.4724	2.5875	0.40184	1.9855	0.43104	2.0876	0.39518
1	hatchling	3.38716	0.43722	3.67306	0.52018	3.59505	0.46178	1.715	0.46032	3.4126	0.48861	3.43923	0.48481	3.12053	0.46267
1	hatchling	3.56512	0.51759	3.55989	0.50277	3.45318	0.44274	1.3451	0.45257	3.27123	0.48108	3.26748	0.45466	2.86684	0.40972
1	adult	3.6575	0.57548	3.90072	0.54139	3.64541	0.64391	3.39161	0.54037	3.62723	0.51935	3.52337	0.55349	3.46531	0.50322
1	adult	3.62798	0.50505	3.75969	0.53306	3.54305	0.47542	2.99262	0.50964	3.35443	0.52627	3.54875	0.51282	3.16703	0.44897
1	hatchling	0.38931	0.6702	0.36565	0.60734	0.35637	0.54401	0.4532	0.56596	0.42563	0.49637	0.98894	0.54986	0.47957	0.49158
1	hatchling	0.24292	3.61336	0.23353	3.57107	0.19287	3.38042	0.29385	2.35352	0.28949	3.21556	0.41196	3.20869	0.30486	3.05699
1	hatchling	0.4336	0.56744	0.40935	0.60417	0.42701	0.55655	0.58712	0.64129	0.48625	0.51896	0.98519	0.58741	0.54404	0.49971
1	hatchling	0.31026	0.50589	3.65411	0.55762	0.31224	0.42416	0.32904	0.42429	0.3386	0.3899	3.09329	0.45966	0.34837	0.38848
1	hatchling	0.3305	0.49971	0.33376	0.55698	0.31815	0.5028	0.40505	0.54708	0.37438	0.45106	0.91385	0.51629	0.41998	0.47349
1	hatchling	3.40988	0.53706	3.37904	0.57571	3.04892	0.49032	1.85879	0.46196	3.17317	0.50016	3.04896	0.44662	2.60339	0.43514
1	adult	3.83973	0.62922	3.72538	0.56394	3.73128	0.69266	3.37084	0.64805	3.76468	0.54092	3.40306	0.53136	3.45945	0.48132
1	adult	3.91631	0.60192	3.78907	0.53536	3.62474	0.63204	3.24439	0.7197	3.52242	0.50373	3.46072	0.54235	3.41428	0.47806
1	hatchling	0.36522	0.60859	0.32176	1.90794	0.26233	2.75442	0.42778	0.57191	0.39244	0.79555	0.91624	0.57248	0.50737	0.54067
1	hatchling	0.23935	3.71898	0.2472	3.62908	0.20904	3.56824	0.58773	2.7624	0.30669	3.2577	0.35388	3.43612	0.30374	3.23211
1	hatchling	0.30954	0.56843	0.32302	0.57261	0.28702	0.46443	0.35358	0.49703	0.36998	0.51161	0.80897	0.50198	0.41173	0.5127
1	hatchling	0.33716	0.55714	0.34979	0.61728	0.32525	0.53504	0.3765	0.53256	0.38691	0.49682	0.74624	0.53019	0.43913	0.53262
1	hatchling	0.34553	0.44535	0.34955	0.45978	0.33061	0.44027	0.40432	0.50537	0.39465	0.45055	0.92174	0.49843	0.42105	0.45271
1	hatchling	0.31035	0.57189	0.33036	0.62576	0.30908	0.56528	0.37121	0.53903	0.38186	0.50487	0.91948	0.50592	0.47304	0.50354
1	adult	3.84762	0.58242	3.80947	0.56975	3.64239	0.64991	3.50612	0.55157	3.53096	0.50441	3.58238	0.6277	3.40336	0.51106
1	adult	3.75237	0.52761	3.63923	0.51595	3.74183	0.52047	3.15201	0.47316	3.51419	0.48353	3.49385	0.53918	3.29983	0.47249
1	hatchling	0.3312	0.58467	0.26219	0.48106	0.24389	0.47814	0.35464	0.58967	0.32179	0.43144	0.63956	0.49619	0.37309	0.51801
1	hatchling	0.35696	3.61923	0.34449	3.51907	0.20787	3.60158	2.07589	2.14932	0.3522	3.35936	0.37858	3.34444	0.36749	3.19648
1	hatchling	0.25101	3.63288	0.28388	3.5615	0.27018	2.36377	0.67196	0.86462	0.36484	2.55003	0.96479	0.53408	0.3954	2.04004
1	hatchling	2.82709	0.45922	2.50064	0.51966	1.0941	0.44762	0.45973	0.50224	0.40115	0.47731	2.3216	0.43349	0.74425	0.44839
1	hatchling	0.36909	0.42522	0.33809	0.44252	0.33394	0.4062	0.36202	0.4264	0.41272	0.42528	0.82634	0.43962	0.42399	0.41672
1	hatchling	0.30026	0.57306	0.28637	0.58666	0.30225	0.50102	0.36941	0.52649	0.36872	0.50044	0.74309	0.5236	0.38013	0.49403
1	adult	3.73876	0.50143	3.71628	0.64931	3.58248	0.72174	3.32574	0.69462	3.56817	0.51383	3.41164	0.74447	3.38326	0.46084
1	adult	3.73418	0.61497	3.84558	0.64338	3.49294	0.84841	3.62079	0.66208	3.54974	0.5369	3.50112	0.69578	3.46414	0.51933
1	hatchling	0.24646	3.78483	0.25639	3.6974	0.20509	3.58869	0.31169	3.35466	0.3141	3.35627	0.3902	3.29638	0.28441	3.42836
1	hatchling	0.23257	3.65653	0.2163	3.48155	0.2328	3.64717	0.25932	3.34514	0.29198	3.35284	0.34108	3.38783	0.28835	3.40825
1	hatchling	0.35282	0.58075	0.40454	0.6298	0.3657	0.56398	0.45688	0.56688	0.44367	0.54526	1.03661	0.57604	0.54136	0.53833
1	hatchling	0.25804	3.36813	0.26525	3.08698	0.30572	1.53118	0.39093	0.55996	0.3681	1.33327	0.93767	0.5874	0.34831	2.29671
1	hatchling	0.23954	3.61816	0.24439	3.52928	0.22287	3.43125	0.30543	2.05211	0.30784	2.95736	0.50291	2.80433	0.32516	2.61029
1	hatchling	0.40655	0.56613	0.4423	0.63437	0.41101	0.54478	0.44177	0.56177	0.44642	0.50479	0.9595	0.57944	0.56295	0.54333
1	hatchling	0.32859	0.47812	2.02107	0.44441	0.49177	0.49109	0.35994	0.47875	1.96239	0.45595	0.88892	0.47119	0.41696	0.45456
1	hatchling	3.89963	0.64217	3.8206	0.56303	3.68803	0.60822	3.2697	0.54745	3.72106	0.48747	3.44449	0.55955	3.38994	0.49748
1	hatchling	0.33893	0.69818	0.3285	0.65959	0.35015	0.56398	0.47584	0.65052	0.37288	0.52133	0.94435	0.58837	0.49408	0.58067
1	hatchling	0.21624	3.74139	0.47647	3.56268	0.66758	3.04784	0.32069	2.77818	0.88012	3.00444	0.84324	2.9998	0.27244	3.32898
1	hatchling	0.29356	0.60542	0.29877	0.54123	0.3022	0.51324	0.51433	0.71121	0.33625	0.48906	0.8603	0.60158	0.39069	0.54806
1	hatchling	0.33308	0.5945	0.31093	0.6814	0.30989	0.55831	0.60221	0.79141	0.36483	0.52178	0.85581	0.54374	0.44488	0.55657
1	hatchling	0.20979	3.55603	0.22319	3.63295	0.20674	3.63277	0.34039	0.93215	0.28334	3.3216	0.39411	3.45342	0.2913	3.15147
1	hatchling	0.30943	0.47024	0.31914	0.50321	0.33434	0.4719	0.38108	0.48848	0.37814	0.48296	0.96714	0.52813	0.44646	0.46743
1	hatchling	3.42867	0.51095	3.73949	0.56862	3.39629	0.52608	2.9798	0.51353	3.46058	0.50294	3.29307	0.497	3.10318	0.48304
1	hatchling	0.33201	0.64436	0.38366	0.71706	0.36925	0.70377	0.42367	0.66396	0.3851	0.59987	0.90906	0.70767	0.47102	0.62764
1	hatchling	0.33484	0.65119	0.3271	0.65837	0.33224	0.60785	0.50768	0.73039	0.3998	0.59059	0.90854	0.63645	0.49535	0.58388
1	hatchling	0.22218	3.44366	0.21677	3.50282	0.20741	3.5074	0.35813	0.48336	0.28452	3.23449	0.31002	3.21975	0.27569	3.10035
1	hatchling	0.31995	0.48377	0.32118	0.5399	0.3401	0.501	0.45192	0.61041	0.40498	0.54232	0.70432	0.46334	0.39584	0.44389
1	hatchling	0.21518	3.78984	0.23793	3.5531	0.19842	3.62337	0.2787	2.8459	0.31141	3.51115	0.31527	3.13345	0.27192	3.30781
1	hatchling	0.26149	3.1226	0.26815	2.19713	0.31409	0.72714	0.4857	0.59933	0.32515	1.73106	0.90603	0.52903	0.36561	1.48336
1	hatchling	0.34506	0.46118	0.36423	0.49979	0.35049	0.46268	0.43471	0.45961	0.38837	0.43422	0.8995	0.42625	0.47531	0.4528
1	hatchling	0.35289	0.58387	0.42211	0.7844	0.38473	0.68096	0.45382	0.67442	0.41144	0.62028	0.88183	0.66666	0.50521	0.60516
1	hatchling	1.85775	2.37329	1.64808	2.38802	1.62398	2.27144	1.36705	2.05954	2.11292	1.79001	1.68856	2.07886	1.62852	1.70946
1	hatchling	0.33857	0.63334	0.36069	0.65427	0.36882	0.55603	0.53796	0.72113	0.38153	0.48243	0.898	0.60255	0.44737	0.55984
1	hatchling	0.20419	3.49684	0.21889	3.61937	0.20406	3.58335	0.3158	1.75807	0.28203	3.17131	0.30063	3.57516	0.25428	3.2246
1	hatchling	0.21783	3.73655	0.22931	3.64285	0.20174	3.51424	0.26766	2.52999	0.29524	3.32787	0.30478	3.43666	0.2629	3.27843
1	hatchling	0.22351	3.77673	0.21195	3.69288	0.21176	3.78004	0.32749	0.49357	0.27123	3.25413	0.32556	3.40689	0.27507	3.0959
1	hatchling	0.33746	0.49688	0.39456	0.60127	0.37128	0.48247	0.51176	0.60136	0.40493	0.5076	0.81463	0.54118	0.47033	0.48777
1	hatchling	1.28116	1.91307	1.17983	1.96712	0.66491	1.94882	0.41816	0.47197	0.90615	2.5932	1.03896	0.9348	0.86926	1.17775
1	hatchling	3.57852	0.56042	3.58735	0.58543	3.44207	0.47721	2.43941	0.52147	3.36127	0.52221	3.15184	0.48873	2.76062	0.43777
1	hatchling	0.31364	0.61276	0.3197	0.61019	0.31787	0.55735	0.49648	0.66921	0.37119	0.50787	0.98849	0.60669	0.46571	0.57862
1	hatchling	0.21235	3.60991	1.63536	2.75694	0.20394	3.63543	0.30845	3.06223	0.31275	3.31432	0.3351	3.2762	0.27326	3.28068
1	hatchling	0.28317	0.58435	0.28129	0.60411	0.28451	0.49121	0.49064	0.71369	0.31663	0.5274	0.75957	0.52981	0.4003	0.54763
1	hatchling	0.2076	3.61242	0.22919	3.59985	0.21555	3.6829	0.34064	0.67498	0.27462	3.16409	0.37182	3.23508	0.30319	3.30626
1	hatchling	0.2116	3.82177	0.22014	3.61209	0.19629	3.64573	0.2717	3.02815	0.30542	3.20213	0.31414	3.36653	0.24331	3.21992
1	hatchling	0.30168	0.55816	0.30582	0.59366	0.31711	0.50554	0.50405	0.63991	0.39498	0.50856	0.98203	0.53322	0.44361	0.46987
1	hatchling	3.65402	0.59729	3.79359	0.56901	3.5899	0.61501	3.17855	0.56144	3.60298	0.54533	3.36768	0.51835	3.24077	0.48554
1	hatchling	0.31708	0.57426	0.36996	0.64575	0.32679	0.55601	0.39391	0.58656	0.3978	0.53941	0.91459	0.63546	0.46743	0.56445
1	hatchling	0.30542	0.62474	0.30897	0.71349	0.30462	0.59933	0.39968	0.64646	0.34835	0.54327	0.7847	0.58283	0.42651	0.54353
1	hatchling	0.32799	0.60907	0.3889	0.72027	0.3076	0.55492	0.58161	0.73802	0.34882	0.51528	0.84851	0.57296	0.45913	0.56924
1	hatchling	0.35201	0.47399	0.3622	0.51556	0.37667	0.46652	0.46488	0.55758	0.41326	0.43188	0.85154	0.46792	0.45129	0.44914
1	hatchling	0.32271	0.58564	0.43847	0.92758	0.34402	0.58015	0.50007	0.74152	0.39362	0.54691	0.9536	0.62823	0.54035	1.12854
1	hatchling	0.20617	3.7048	0.22856	3.56571	0.19984	3.58183	0.26512	2.49758	0.29329	3.28753	0.29447	3.29669	0.26665	3.16496
1	hatchling	0.26275	2.50224	0.28906	1.5147	0.31498	0.52582	0.40712	0.56527	0.30399	1.97463	0.93461	0.47139	0.42951	1.20582
1	hatchling	2.1408	2.21524	2.40404	2.15954	1.86284	2.34925	1.7144	2.46531	2.50135	1.72133	1.91616	2.18535	1.86226	2.02557
1	hatchling	0.29555	0.57101	0.31981	0.66053	0.33663	0.59629	0.39441	0.55512	0.37701	0.52513	0.91711	0.60496	0.45564	0.51618
1	hatchling	0.25296	3.62878	0.22028	3.63515	0.21089	3.46302	0.29658	2.79112	0.29585	3.21697	0.3458	3.11842	0.30213	3.17343
1	hatchling	0.21604	3.87237	0.26924	3.56254	0.19329	3.54702	0.31099	3.33879	0.34267	3.46931	0.33526	3.34342	0.26376	3.43839
1	hatchling	0.25445	3.29566	0.23718	3.34235	0.23319	3.3681	0.37591	0.45687	0.30689	3.02188	0.39474	2.61832	0.323	2.65115
1	hatchling	0.27374	0.54926	0.30024	0.6208	0.30344	0.57388	0.41818	0.65243	0.33016	0.5012	0.77655	0.56259	0.4105	0.53743
1	hatchling	0.22647	3.60285	0.2282	3.45709	0.2096	3.47791	0.37661	0.54246	0.2924	3.03438	0.48323	2.78017	0.93905	1.46839
1	hatchling	0.34438	0.45889	0.37168	0.53383	0.3578	0.44937	0.40968	0.49465	0.40946	0.46822	0.92758	0.4683	0.46166	0.46436
1	hatchling	0.3302	0.48523	0.33227	0.50521	0.35253	0.49673	0.398	0.53588	0.39195	0.47497	0.84725	0.46683	0.39614	0.41155
1	hatchling	0.30241	0.6091	0.33661	0.71721	0.32838	0.61992	0.38451	0.66762	0.41701	0.58963	0.82218	0.60139	0.44371	0.59748
1	hatchling	0.36039	0.48526	0.28152	3.10021	0.28594	2.05202	0.40119	0.49829	0.35655	2.21684	0.84161	0.46737	0.41216	1.72655
1	hatchling	0.30595	0.56354	0.33953	0.63176	0.35075	0.57876	0.61845	0.73775	0.40698	0.52566	0.97071	0.58489	0.47704	0.54761
1	hatchling	0.28241	0.5486	0.29426	0.58896	0.26922	0.50241	0.36391	0.59797	0.33607	0.47628	0.72593	0.499	0.3723	0.49785
1	hatchling	0.28276	0.59676	0.29675	0.6177	0.30847	0.58263	0.45793	0.69739	0.35896	0.52439	0.81101	0.55363	0.40121	0.55704
1	hatchling	0.24089	3.34585	0.23162	3.12496	0.29748	1.08945	0.38618	0.53441	0.30466	2.13259	0.69415	1.71787	0.32549	1.98712
1	hatchling	0.36203	0.58287	0.38062	0.67485	0.34816	0.52944	0.44776	0.56898	0.37876	0.49373	0.96258	0.52211	0.47	0.50597
1	hatchling	3.48374	0.47266	3.72115	0.54626	3.58484	0.49319	2.7244	0.45109	3.35121	0.45218	3.2972	0.47555	2.94325	0.43474
1	hatchling	0.29654	0.63777	0.34695	0.68079	0.321	0.54977	0.36713	0.59312	0.35076	0.52447	0.79035	0.59841	0.44183	0.58426
1	hatchling	0.32235	0.59308	0.25796	2.55771	0.29002	0.57836	0.38195	0.58387	0.35457	1.3544	0.89819	0.52893	0.41839	0.89857
1	hatchling	0.32191	0.5917	0.32611	0.64085	0.32183	0.56739	0.60185	0.8096	0.3952	0.5479	0.94791	0.63892	0.45979	0.57331
1	hatchling	0.28375	0.55999	0.30837	0.64344	0.28767	0.52881	0.45851	0.6964	0.34034	0.51816	0.74407	0.52717	0.39574	0.51822
1	hatchling	0.31106	0.63574	0.34233	0.65505	0.34055	0.57802	0.6067	0.81318	0.3686	0.51284	0.96807	0.59926	0.46967	0.57212
1	hatchling	0.3079	0.52918	0.32028	0.60968	0.30516	0.5321	0.56029	0.68392	0.38504	0.487	0.97248	0.56017	0.45611	0.51105
1	hatchling	0.31066	0.58663	0.30582	0.64561	0.30612	0.57103	0.4173	0.67306	0.34087	0.51813	0.81023	0.56011	0.45217	0.5787
1	hatchling	3.65432	0.56304	3.76382	0.60518	3.45417	0.56492	3.18117	0.53004	3.53387	0.51503	3.48792	0.55274	3.15453	0.44478
1	hatchling	3.17594	0.53861	3.32113	0.57756	2.95643	0.49292	1.79859	0.54059	3.01328	0.47238	2.82222	0.54663	2.54324	0.48318
1	hatchling	1.84807	2.29784	2.11531	2.27006	1.912	2.34971	1.59046	2.1333	2.23854	1.75949	1.79402	2.18681	1.66118	1.81774
1	hatchling	0.20918	3.57918	0.26236	3.75419	0.19545	3.57992	0.32225	1.74144	0.32545	3.32937	0.37564	3.36944	0.28093	3.32809
1	hatchling	0.21147	3.7483	0.26058	3.50172	0.18995	3.66727	0.2862	2.69186	0.27736	3.4714	0.28473	3.40502	0.26817	3.36152
1	hatchling	0.22619	3.71996	0.24221	3.72549	0.19944	3.4579	0.29528	3.03679	0.28851	3.3032	0.30241	3.27681	0.26617	3.24853
1	hatchling	0.23154	3.59953	0.24626	3.58084	0.21889	3.24026	0.39816	0.55106	0.30119	2.99406	0.51852	2.61365	0.31902	2.46143
1	hatchling	0.31439	0.55716	0.33983	0.58488	0.32309	0.53424	0.38847	0.55884	0.37568	0.53625	0.94156	0.57418	0.47505	0.52505
1	hatchling	3.63473	0.53915	3.69453	0.58846	3.52582	0.56513	3.08919	0.55086	3.41528	0.4924	3.45185	0.55221	3.09357	0.49276
1	hatchling	0.45113	0.53553	0.43479	0.61251	0.44363	0.53935	0.4784	0.51616	0.48613	0.52344	0.94232	0.53932	0.4966	0.50063
1	hatchling	0.22175	3.6684	0.48477	3.62747	0.20825	3.56059	0.37324	3.30526	0.34017	3.28683	0.38305	3.31168	0.30425	3.33028
1	hatchling	1.70478	2.00576	0.21711	3.53829	0.74459	0.40054	0.26453	2.81948	1.13455	2.3615	0.53664	2.52108	0.86017	2.01643
1	hatchling	0.22294	3.58765	0.22998	3.71994	0.2023	3.69236	0.26304	3.04468	0.2973	3.44052	0.34177	3.34295	0.2808	3.1186
1	hatchling	0.20933	3.81043	0.27392	3.70114	0.19415	3.59377	0.34755	3.22282	0.34366	3.44255	0.3865	3.49495	0.26559	3.41949
1	hatchling	0.34728	0.54684	0.38713	0.61093	0.36531	0.54191	0.4283	0.50674	0.41662	0.48291	1.00975	0.5232	0.46936	0.50743
1	hatchling	0.50095	0.52917	0.48922	0.59664	0.50624	0.55275	0.51145	0.56869	0.52333	0.51413	0.95966	0.56109	0.59422	0.50697
1	hatchling	3.73194	0.60526	3.89322	0.65012	3.65564	0.65146	3.26508	0.86807	3.5807	0.51619	3.59059	0.53416	3.34521	0.45881
1	hatchling	0.42066	0.63801	0.44874	0.65768	0.40426	0.55933	0.4605	0.58243	0.45818	0.55943	0.67043	0.70365	0.5508	0.62605
1	hatchling	0.22334	3.71934	0.26921	3.64797	0.20383	3.70908	0.29939	3.31632	0.3392	3.30332	0.34334	3.30613	0.30368	3.3851
1	hatchling	0.34581	0.41865	0.34123	0.46321	0.3447	0.39668	0.37426	0.4206	0.40222	0.42287	0.85247	0.43123	0.44285	0.42873
1	hatchling	0.38877	0.59216	0.36778	0.6125	0.38115	0.53722	0.44368	0.59799	0.44058	0.59075	0.9476	0.57035	0.48873	0.51539
1	hatchling	0.21247	3.64234	0.235	3.79495	0.19711	3.68361	0.25918	3.39068	0.28754	3.24202	0.3257	3.39376	0.25345	3.26285
1	hatchling	0.35026	0.479	0.35567	0.49998	0.34119	0.45769	0.38285	0.46456	0.4361	0.4618	0.91069	0.4541	0.45932	0.45558
1	hatchling	0.33225	0.62715	0.37206	0.70788	0.31441	0.59261	0.39437	0.59329	0.38355	0.55396	0.94717	0.63995	0.44402	0.52779
1	hatchling	3.63561	0.55594	3.81068	0.62822	3.46969	0.69572	3.39403	0.53809	3.51038	0.51197	3.5005	0.56077	3.48064	0.51265
1	hatchling	2.18495	0.53247	1.91202	0.49247	0.53984	0.5088	0.53351	0.52982	2.47738	0.46122	0.89777	0.48488	1.80548	0.42474
1	adult	3.60554	0.55351	3.55817	0.56433	3.59842	0.65327	3.23093	0.52583	3.41046	0.48594	3.50271	0.58982	3.34449	0.50946
1	adult	3.63071	0.57904	3.65612	0.5719	3.64245	0.56136	2.83431	0.50549	3.54435	0.49882	3.4199	0.49577	3.32353	0.43139
1	adult	3.58794	0.53849	3.77025	0.59057	3.48932	0.53254	2.95038	0.52782	3.56286	0.51981	3.59029	0.5484	3.33797	0.43442
1	adult	3.73716	0.55417	3.80759	0.52495	3.65449	0.60782	3.20493	0.49027	3.68862	0.53788	3.68567	0.55744	3.27103	0.44853
1	adult	3.7048	0.49657	3.80511	0.50287	3.64459	0.48769	2.98562	0.46074	3.46556	0.49395	3.51917	0.51644	3.1768	0.4516
1	adult	3.59565	0.58868	3.7488	0.55352	3.596	0.59598	3.05023	1.36388	3.66895	0.47717	3.52697	0.49318	3.37624	0.48954
1	adult	3.80118	0.62608	3.85871	0.56799	3.53731	0.51105	3.18484	0.7173	3.64178	0.52965	3.37612	0.49102	3.42989	0.4497
1	adult	3.83654	0.65939	3.8786	0.58541	3.81324	0.65033	3.54931	0.53423	3.56492	0.4664	3.67838	0.57425	3.444	0.51324
1	adult	3.61075	0.59955	3.76674	0.64398	3.56728	0.80261	3.12625	0.56611	3.43532	0.47411	3.75284	0.60842	3.40672	0.50158
1	adult	3.58047	0.62109	3.6428	0.5597	3.56908	0.65882	2.93617	0.5789	3.50966	0.47838	3.46738	0.58356	3.3305	0.47461
1	adult	3.76033	0.5385	3.9152	0.5844	3.54718	0.59308	1.93873	0.53465	3.49168	0.54945	3.3141	0.53601	3.10004	0.43469
1	adult	3.70024	0.53742	3.71104	0.52135	3.53393	0.54618	2.37206	0.49257	3.4983	0.51031	3.44084	0.52751	3.35866	0.49624
1	adult	3.71304	0.54919	3.79549	0.51988	3.61204	0.54398	2.63024	0.5001	3.53029	0.49338	3.48507	0.52436	3.2954	0.44001
1	adult	3.75982	0.62779	3.83446	0.55929	3.58462	0.58714	3.09422	0.55717	3.59507	0.5326	3.51469	0.51856	3.42645	0.49012
1	adult	3.76623	0.64307	3.83918	0.58292	3.69148	0.616	3.59571	0.59556	3.58014	0.50472	3.49538	0.55606	3.34297	0.45682
1	adult	3.75095	0.51378	3.78994	0.50231	3.69294	0.46753	3.14169	0.4782	3.57632	0.47168	3.53112	0.47714	3.18896	0.45626
1	adult	3.4941	0.53888	3.72363	0.62644	3.44611	0.68938	3.06902	0.56235	3.62205	0.55847	3.46708	0.56823	3.33661	0.49489
1	adult	3.45912	0.49413	3.83479	0.53658	3.74611	0.51793	1.58195	0.43001	3.4367	0.4986	3.55028	0.49354	3.12329	0.43518
1	adult	3.58089	0.53936	3.66747	0.55003	3.56903	0.51838	2.36175	0.52745	3.43916	0.48274	3.45248	0.51722	3.22885	0.4647
1	adult	3.57192	0.57427	3.80521	0.59405	3.54312	0.62018	2.77274	0.54917	3.60906	0.4886	3.38628	0.56001	3.41893	0.49365
1	adult	3.60884	0.54434	3.74988	0.54508	3.66791	0.57328	2.22903	0.50733	3.43523	0.50782	3.30361	0.50443	3.20584	0.43498
1	adult	3.69106	0.58935	3.75959	0.58899	3.63045	0.5693	3.06299	0.57129	3.60672	0.50861	3.52834	0.55009	3.38207	0.5023
1	adult	3.64402	0.60837	3.85068	0.59792	3.68409	0.59616	3.47132	0.54267	3.55989	0.51826	3.58029	0.58036	3.37453	0.50325
1	adult	3.73855	0.63739	3.73368	0.51341	3.6242	0.61788	3.42409	0.89813	3.65335	0.52765	3.65653	0.57388	3.50885	0.52694
1	adult	3.60212	0.59461	3.74136	0.64458	3.49634	0.85682	3.41017	0.64717	3.61959	0.54573	3.47644	0.6085	3.29905	0.5038
1	adult	3.62133	0.55026	3.76291	0.57151	3.44953	0.60656	2.61072	0.51345	3.50034	0.50869	3.41134	0.57305	3.37272	0.5019
1	adult	3.81516	0.57216	3.71896	0.58326	3.45891	0.57572	2.87808	0.52519	3.42777	0.5227	3.5258	0.59678	3.49474	0.50004
1	adult	3.56997	0.5836	3.62575	0.5663	3.58842	0.63071	2.95182	0.55565	3.31059	0.48339	3.50257	0.55203	3.36393	0.48495
1	adult	3.50858	0.49676	3.8503	0.57119	3.61767	0.49407	2.58164	0.49224	3.45305	0.46512	3.44556	0.51899	3.29988	0.46368
1	adult	3.72237	0.57786	3.77908	0.56384	3.68204	0.63397	3.12445	0.52728	3.4862	0.59468	3.52844	0.58309	3.35848	0.50177
1	adult	3.63089	0.57368	3.81101	0.56399	3.64314	0.5636	3.43994	0.51113	3.55835	0.50325	3.45863	0.54099	3.30379	0.4911
1	adult	3.6404	0.59781	3.88797	0.65571	3.79855	0.64436	3.41903	0.49075	3.54188	0.50833	3.53632	0.57972	3.36768	0.47423
1	adult	3.48672	0.57099	3.71288	0.63541	3.57183	0.76453	3.30641	0.61229	3.56077	0.50588	3.47025	0.59291	3.30896	0.46704
1	adult	3.56611	0.49122	3.65026	0.54593	3.67366	0.50582	2.10644	0.46493	3.38214	0.46347	3.25433	0.46977	3.10872	0.4601
1	adult	3.71576	0.55571	4.0767	0.66734	3.5832	0.60676	3.09592	0.61205	3.50379	0.49144	3.51066	0.54212	3.39102	0.47533
1	adult	3.62277	0.59382	3.83244	0.5713	3.54358	0.61719	3.07229	0.59495	3.68607	0.5327	3.51343	0.5673	3.40364	0.49734
1	adult	3.68064	0.5889	3.75321	0.54025	3.70614	0.60964	2.94708	0.54492	3.50947	0.50514	3.58097	0.54129	3.31328	0.47282
1	adult	3.61045	0.50466	3.74048	0.52682	3.58178	0.55662	2.916	0.53373	3.56904	0.536	3.48762	0.51649	3.35292	0.46252
1	adult	3.70766	0.62194	3.75899	0.61101	3.65224	0.56586	3.27093	0.63014	3.76873	0.52599	3.51504	0.55083	3.27684	0.45277
1	adult	2.35558	2.18659	3.89329	0.54196	3.79557	0.62313	1.91718	2.62896	3.64319	0.48703	3.56045	0.56562	3.40198	0.51197
1	adult	3.59469	0.50643	3.80072	0.54388	3.65156	0.57369	3.19237	0.55373	3.49202	0.47994	3.29571	0.53147	3.28803	0.46869
1	adult	3.63851	0.57331	3.75512	0.55989	3.59858	0.62436	2.99921	0.58063	3.50392	0.48528	3.37572	0.54339	3.3637	0.46639
1	adult	3.63092	0.59407	3.82118	0.59306	3.54667	0.6382	2.93289	0.51207	3.5899	0.50753	3.36851	0.56144	3.42648	0.50875
1	adult	3.58402	0.61091	3.78566	0.60847	3.52187	0.58924	2.98232	0.55514	3.58895	0.52903	3.42154	0.50711	3.47904	0.50758
1	adult	3.75254	0.60967	3.95149	0.61843	3.52536	0.58146	3.18158	0.55733	3.43879	0.48968	3.43501	0.52923	3.33693	0.47645
1	adult	3.70363	0.56203	3.83652	0.56348	3.62555	0.56244	3.18818	0.58373	3.65051	0.5515	3.51375	0.56201	3.32694	0.45985
1	adult	3.64554	0.5151	3.72241	0.50803	3.70102	0.47835	3.21732	0.50676	3.50699	0.4845	3.39891	0.53266	3.27202	0.44535
1	adult	3.683	0.50475	3.87173	0.54596	3.50157	0.46467	3.30975	0.52422	3.3714	0.50256	3.40118	0.5105	2.94858	0.44883
1	adult	3.8449	0.58978	3.8435	0.58113	3.52494	0.60584	3.30969	0.53988	3.46629	0.46744	3.37682	0.54572	3.46277	0.52209
1	adult	3.58323	0.51802	3.70427	0.55282	3.55162	0.5112	2.45763	0.50222	3.38323	0.47634	3.28025	0.52281	3.15355	0.44111
1	adult	3.65691	0.53691	3.78105	0.54959	3.54024	0.5605	2.89886	0.55002	3.48481	0.54737	3.36458	0.51509	3.17515	0.46067
1	adult	3.57042	0.56209	3.7628	0.51472	3.52442	0.50769	2.47321	0.46714	3.44633	0.45678	3.62706	0.52651	3.07184	0.42654
1	adult	3.64047	0.53504	3.77983	0.54203	3.7081	0.56121	2.8597	0.51379	3.43297	0.47144	3.38701	0.51778	3.2609	0.45445
1	adult	3.67482	0.52099	3.65159	0.54012	3.49737	0.52962	3.06493	0.50311	3.50857	0.5397	3.37626	0.53072	3.28766	0.48647
1	adult	3.80491	0.56607	3.83954	0.5391	3.52382	0.57861	3.30799	0.86385	3.71426	0.51632	3.48693	0.53972	3.42836	0.50422
1	adult	2.30065	2.20579	3.81837	0.64174	2.64294	1.8356	2.80495	1.607	3.5914	0.54035	3.32677	0.58623	3.46845	0.50727
1	adult	3.68743	0.53403	3.77855	0.62862	3.49197	0.72569	3.35732	0.64772	3.44864	0.52103	3.42659	0.62458	3.4593	0.51655
1	adult	3.57231	0.50823	3.74262	0.58151	3.62209	0.62788	2.72114	0.47155	3.47173	0.48966	3.4129	0.53098	3.24523	0.4755
1	adult	3.69676	0.60266	3.73819	0.54693	3.63643	0.58366	2.5716	0.50935	3.5737	0.52183	3.44355	0.51764	2.96854	0.65561
1	adult	3.77464	0.58613	3.75829	0.56142	3.48971	0.60856	2.97545	0.5807	3.54533	0.52695	3.49634	0.53967	3.26861	0.49361
1	adult	3.62488	0.52569	3.89034	0.60065	3.60502	0.59113	3.22187	0.58503	3.56727	0.49403	3.40137	0.52343	3.37257	0.49996
1	adult	3.59383	0.57468	3.71669	0.55015	3.48077	0.55272	3.20347	0.57687	3.68069	0.49648	3.3552	0.54853	3.28738	0.44688
1	adult	3.86145	0.62845	3.80682	0.54943	3.72475	0.59256	3.31819	0.53679	3.62223	0.51719	3.54565	0.53255	3.28927	0.47098
1	adult	3.76784	0.67086	4.00164	0.62747	3.75219	0.73071	3.49716	0.55283	3.65405	0.53689	3.48653	0.56507	3.54316	0.50786
1	adult	3.64377	0.50136	3.79471	0.57919	3.54967	0.61621	3.28539	0.58726	3.41508	0.49751	3.40008	0.54567	3.20277	0.5179
1	adult	3.62251	0.53368	3.7298	0.59993	3.64211	0.5802	2.68964	0.52461	3.55811	0.51618	3.3087	0.50191	3.25983	0.47401
1	adult	3.76039	0.5573	3.61554	0.5658	3.55951	0.63846	3.12371	0.55153	3.62784	0.48488	3.44458	0.54351	3.3896	0.4763
1	adult	3.69484	0.53427	3.83971	0.56334	3.5591	0.50936	2.1751	0.49892	3.43295	0.50914	3.46315	0.49407	3.26654	0.46012
1	adult	3.51688	0.5574	3.8763	0.5925	3.56755	0.55845	3.14812	0.53535	3.50836	0.48364	3.41984	0.51015	3.23283	0.46371
1	adult	3.72903	0.52698	3.8321	0.60995	3.67739	0.59521	3.38579	0.57441	3.60798	0.51751	3.38478	0.53838	3.42811	0.51239
1	adult	3.69039	0.56083	3.86527	0.60643	3.62728	0.59911	3.4471	0.52818	3.73348	0.51899	3.45385	0.54024	3.44946	0.47449
1	adult	2.89725	1.66109	3.92713	0.56322	2.43377	1.95259	2.22502	2.60532	2.69121	1.80305	3.4712	0.54379	2.02639	2.19314
1	adult	3.56676	0.5282	3.76329	0.62267	3.59	0.80223	3.46303	0.62981	3.60461	0.53689	3.33613	0.59059	3.49073	0.49663
1	adult	3.24204	0.42205	3.41637	0.51095	3.25356	0.43506	1.38017	0.42513	3.10797	0.43869	2.97488	0.38946	2.70221	0.41877
1	adult	3.72615	0.57749	3.81011	0.60016	3.73357	0.64793	3.34343	0.61151	3.64332	0.48781	3.50241	0.56165	3.52799	0.45493
1	adult	3.82994	0.58584	3.87505	0.56326	3.64453	0.63945	3.23299	0.56504	3.74379	0.53397	3.5415	0.56511	3.46154	0.45283
1	adult	3.71815	0.557	3.93109	0.57211	3.69581	0.61087	3.23399	0.57893	3.56789	0.49808	3.51996	0.5327	3.3115	0.49718
1	adult	3.48476	0.59491	3.72382	0.56246	3.48583	0.55253	3.27411	0.58066	3.57137	0.50143	3.29678	0.46166	3.27143	0.47887
1	adult	3.84418	0.60345	3.90342	0.57869	3.6724	0.63276	3.5027	0.57636	3.62533	0.5113	3.59717	0.59235	3.39824	0.47734
1	adult	3.8906	0.5345	3.83596	0.51013	3.51325	0.52992	3.20738	0.50121	3.39393	0.48839	3.54408	0.54157	3.25663	0.4791
1	adult	3.7691	0.61023	3.74377	0.63776	3.57584	0.8006	3.44266	0.68839	3.60546	0.5546	3.4521	0.59314	3.40291	0.48943
1	adult	3.59713	0.50227	3.88938	0.6089	3.57945	0.59961	3.20874	0.52177	3.42227	0.49021	3.51776	0.56498	3.24524	0.47646
1	adult	3.74668	0.57441	3.82165	0.59715	3.55281	0.65387	3.39334	0.53311	3.61062	0.52281	3.51472	0.55137	3.49829	0.51412
1	adult	3.73502	0.50032	3.78721	0.49599	3.55758	0.39953	2.74144	0.46864	3.38463	0.48559	3.24105	0.4712	3.06467	0.41619
1	adult	3.74925	0.58986	3.80631	0.58359	3.5529	0.62526	3.307	0.67102	3.59118	0.56941	3.44377	0.54791	3.34248	0.49315
1	adult	3.72046	0.54177	3.87636	0.59141	3.6413	0.57283	3.21452	0.64548	3.46694	0.47191	3.45963	0.59488	3.23844	0.44102
1	adult	3.88527	0.5741	3.91952	0.61904	3.64181	0.68675	3.44824	0.62888	3.48425	0.49286	3.64148	0.62788	3.39811	0.47149
1	adult	3.48983	0.48797	3.70376	0.53927	3.18823	0.41863	2.25742	0.45384	3.13594	0.50719	3.09337	0.40435	2.74592	0.44481
1	adult	3.70341	0.56678	3.67625	0.72106	3.56569	0.88305	3.52227	0.71738	3.50641	0.57425	3.42798	0.64583	3.48062	0.53907
1	adult	3.7632	0.6405	3.6539	0.7315	3.34438	0.9243	3.44389	0.72763	3.56419	0.51613	3.45338	0.73318	3.59722	0.54008
1	adult	3.49384	0.63132	3.75611	0.70349	3.52578	0.79651	3.08981	0.60269	3.59062	0.5261	3.46664	0.643	3.26096	0.52591
1	adult	3.74761	0.57036	3.82854	0.67478	3.59945	0.88988	3.30792	0.99628	3.46718	0.55517	3.41939	0.66475	3.15178	0.81059
1	adult	3.77804	0.57702	3.72079	0.67045	3.60603	0.75382	3.46224	0.63779	3.53583	0.46559	3.17072	0.69574	3.57968	0.50355
1	adult	3.67641	0.55988	3.73002	0.66278	3.49566	0.75668	3.36555	0.62591	3.53568	0.50457	3.47458	0.66054	3.51201	0.52601
1	adult	3.67932	0.58484	3.82411	0.6773	3.62315	0.8068	3.50269	0.71566	3.59218	0.52878	3.40975	0.70581	3.36504	0.49282
1	adult	3.87155	0.61367	4.00109	0.70713	3.57849	0.88583	3.5388	0.67691	3.66609	0.59965	3.50027	0.74022	3.55519	0.5231
1	adult	3.70871	0.65376	2.60283	2.34094	3.53947	0.90926	3.43494	0.69059	3.48206	0.53019	2.20609	2.29589	3.52706	0.5155
1	adult	3.68062	0.66648	3.8887	0.62506	3.72966	0.69807	3.41922	0.53326	3.59907	0.49277	3.56923	0.67332	3.42361	0.48182
1	adult	3.70994	0.68939	3.88104	0.5768	3.65888	0.61369	3.53318	0.55153	3.60967	0.50217	3.36412	0.56484	3.51236	0.49485
1	adult	3.712	0.58548	3.8621	0.51422	3.60925	0.54607	3.29629	0.51032	3.53967	0.49614	3.48183	0.58884	3.32637	0.46675
1	adult	3.78234	0.64169	3.87784	0.54336	3.63628	0.59915	3.49754	0.56525	3.45977	0.49353	3.58323	0.60428	3.48102	0.48597
1	adult	3.66045	0.52546	3.80644	0.51431	3.64974	0.51241	2.93276	0.47799	3.48872	0.52087	3.22787	0.51677	3.10882	0.46458
1	adult	3.69908	0.65074	3.91493	0.51312	3.78491	0.55522	3.35785	0.56704	3.52447	0.50646	3.49638	0.54863	3.48288	0.49329
1	adult	3.79191	0.61361	3.81849	0.55439	3.85508	0.56721	3.33425	0.49796	3.58095	0.52494	3.50575	0.55767	3.47295	0.52613
1	adult	2.16107	2.05435	3.73056	0.62895	3.4201	0.73056	1.88636	2.18991	3.40446	0.51892	3.30755	0.59336	2.17488	1.62425
1	adult	2.2087	2.48502	3.94665	0.54166	3.62768	0.57162	1.24436	2.02757	2.42609	1.72447	3.49614	0.517	2.42107	1.51754
1	adult	3.67105	0.59428	3.80753	0.57487	3.82699	0.67106	3.06829	0.55245	3.4407	0.46992	3.41298	0.53969	3.52945	0.53483
1	adult	3.65639	0.60241	3.77845	0.56417	3.55346	0.58417	2.98274	0.55178	3.51524	0.51195	3.42879	0.53456	3.28932	0.45789
1	adult	3.58768	0.52448	3.6724	0.56271	3.12151	0.60985	2.51517	0.47788	3.49564	0.52321	3.32108	0.50178	3.12247	0.48264
1	adult	2.93445	0.49031	3.54379	0.53625	2.99706	0.44736	2.43857	0.47106	3.34919	0.46584	0.82929	0.43489	2.20122	0.44471
1	adult	3.66917	0.50016	3.81687	0.5563	3.39968	0.50693	3.20181	0.49729	3.49905	0.49179	3.34844	0.52204	3.21397	0.50752
1	adult	3.29779	0.53987	3.83003	0.53879	0.31766	0.42354	2.82901	0.58148	0.34369	0.39948	0.76589	0.40811	3.17396	0.48203
1	adult	3.72774	0.60074	3.74594	0.64927	2.61297	1.79112	3.2385	0.66157	3.46503	0.54221	3.38233	0.59988	2.28816	1.77161
1	adult	3.58516	0.48885	3.627	0.53931	3.47793	0.5086	0.93452	0.46422	3.47142	0.48556	3.42278	0.51609	2.95211	0.46412
1	adult	3.64726	0.60976	3.76692	0.60866	3.48866	0.66	2.68541	0.57387	3.48025	0.49964	3.49343	0.57295	3.40079	0.47854
1	adult	3.66304	0.56026	3.79749	0.57591	3.57747	0.57278	2.44275	0.52238	3.48932	0.50406	3.50631	0.60934	3.29028	0.47661
1	adult	3.53311	0.71082	3.44476	0.92913	3.40269	0.52341	2.23348	0.50677	3.48672	0.48132	3.40724	0.53086	1.67678	1.61375
1	adult	0.29979	0.982	3.74357	0.5689	2.74365	0.45296	1.23427	1.65547	3.61263	0.50766	1.53107	1.97115	2.91073	0.43851
1	adult	1.94333	1.4006	0.27259	0.38834	2.21074	0.44835	2.79183	0.52397	0.31066	3.36727	2.93779	0.45635	0.37394	0.39952
1	adult	3.86491	0.58363	3.84058	0.54971	3.63762	0.56211	3.25485	0.48133	3.52809	0.54395	3.57834	0.545	3.12161	0.45715
1	adult	2.77968	1.83638	2.61276	2.24039	3.52234	0.94486	2.39122	2.16302	2.48736	1.95073	2.23734	2.31546	3.37498	0.4956
1	adult	3.60428	0.54976	3.70188	0.58994	3.47623	0.57588	2.66387	0.53717	3.52793	0.47237	3.38226	0.53279	3.39903	0.4653
1	adult	3.60922	0.60248	3.70252	0.61268	3.61324	0.6903	2.82948	0.56405	3.55966	0.53726	3.44854	0.56111	3.31	0.48334
1	adult	3.65579	0.53123	3.6827	0.57304	3.61204	0.56764	2.07804	0.49859	3.44203	0.52424	3.39378	0.49841	3.20447	0.48275
1	adult	3.14765	0.50668	3.67071	0.55649	0.31643	0.42593	0.34609	0.4273	0.35118	0.41601	3.04921	0.4827	0.3988	0.45069
1	adult	3.54473	0.52505	3.62692	0.55467	3.63355	0.53741	2.6746	0.51227	3.52261	0.46933	3.56498	0.51992	3.2335	0.4661
1	adult	3.52778	0.54737	3.72252	0.56476	3.48692	0.46083	2.87641	0.50448	3.58074	0.50215	3.37355	0.50363	3.17891	0.47702
1	adult	3.66017	0.57896	3.90082	0.63003	3.73935	0.59966	2.97353	1.10671	3.61258	0.57982	3.49693	0.53464	3.31401	0.52901
1	adult	3.71319	0.59514	3.71301	0.66506	3.5259	0.75395	3.28129	0.65876	3.5129	0.5262	3.44736	0.65387	3.21197	0.51738
1	adult	2.21499	2.0991	2.42173	2.2078	2.17951	2.09227	1.55323	1.98661	3.46571	0.4811	2.07747	2.2851	1.98619	2.0174
1	adult	3.46688	0.54019	3.40504	0.84096	3.46934	0.5056	0.60753	0.54974	3.07085	0.91627	2.76007	1.12177	3.15383	0.47178
1	adult	3.66838	0.55784	3.61411	0.56733	3.62059	0.61087	2.68659	0.54816	3.42378	0.4906	3.36211	0.51242	3.37608	0.50384
1	adult	3.5366	0.50911	3.62047	0.49401	3.53966	0.50816	1.86801	0.48574	3.45178	0.45975	3.37854	0.49112	3.15934	0.50331
1	adult	3.5075	0.52549	3.73545	0.54808	3.69925	0.54812	2.94647	0.55213	3.46083	0.56951	3.30626	0.5084	3.22023	0.45922
1	adult	0.2075	3.79521	0.25548	3.72223	0.19713	3.63847	0.34219	3.41383	0.33639	3.35558	0.39403	3.43846	0.26785	3.37242
1	adult	2.24835	2.40115	3.90921	0.66133	3.557	0.63555	1.93503	2.70371	2.35353	1.8853	3.52052	0.56447	3.20332	0.56692
1	adult	1.03732	2.62176	1.71145	2.20444	3.39387	0.42748	1.10935	0.97767	1.97666	1.54907	1.65675	1.72026	2.62203	0.41752
1	adult	3.68181	0.61659	3.82899	0.58289	3.55754	0.67485	3.03752	0.51757	3.42588	0.46198	3.46751	0.56326	3.47339	0.51667
1	adult	2.68302	0.44055	3.14789	0.51585	2.86433	0.41437	0.45424	0.50884	2.78885	0.41811	2.59585	0.43196	2.40695	0.44669
1	adult	3.50991	0.55565	3.75952	0.57299	3.52758	0.60892	2.96775	0.57957	3.56764	0.52536	3.49994	0.57673	3.25134	0.48714
1	adult	3.48222	0.56625	3.76457	0.59929	3.42249	0.53464	2.49217	0.51318	3.44131	0.54719	3.47394	0.5087	3.11134	0.47307
1	adult	3.87789	0.58719	3.5979	0.56351	3.48031	0.53533	2.93734	0.55989	3.5244	0.49388	3.43272	0.51652	3.27305	0.50789
1	adult	3.69849	0.55719	3.55578	0.54666	3.7036	0.62136	3.50432	0.60129	3.68275	0.5449	3.44742	0.53768	3.36925	0.52453
1	adult	3.62047	0.52664	3.93234	0.55661	3.65878	0.60094	3.49024	0.76929	3.73824	0.5153	3.49232	0.5358	3.57201	0.51323
1	adult	3.55125	0.80766	3.71537	0.59755	3.36902	0.71259	3.30284	0.64089	3.37723	0.47685	3.39626	0.57826	3.23119	0.45553
1	adult	3.63286	0.55734	3.70536	0.58585	3.41026	0.62679	3.02098	0.54542	3.54278	0.4896	3.43441	0.53731	3.25455	0.48664
1	adult	3.59137	0.5546	3.83567	0.57656	3.41111	0.64629	2.91005	0.5552	3.42282	0.48151	3.34699	0.56426	3.19016	0.48289
1	adult	2.11387	0.44269	0.27058	0.81476	0.29168	0.40281	0.31833	0.43947	0.32698	0.37943	2.54729	0.42464	0.35501	0.40123
1	adult	3.72731	0.56377	3.66732	0.5275	3.54262	0.57965	2.98441	0.53974	3.4321	0.48536	3.4348	0.52975	3.23806	0.50025
1	adult	3.72768	0.59756	3.66866	0.57377	3.53293	0.55334	2.98655	0.54659	3.51722	0.48397	3.41324	0.5259	3.2395	0.48024
1	adult	2.80946	0.47959	0.31233	0.38153	2.64247	0.4511	2.49478	0.46084	0.37049	0.4099	0.74385	0.40489	0.36573	0.39821
1	adult	3.62752	0.71811	3.77114	0.59512	3.76537	0.65916	2.97963	1.38645	3.62465	0.48974	3.54861	0.52855	3.3887	0.5716
1	adult	3.62872	0.50414	3.64774	0.5401	3.55219	0.55867	2.97919	0.51629	3.37956	0.48962	3.1892	0.49681	3.1875	0.42453
1	adult	3.75382	0.52838	3.68208	0.58742	3.59227	0.63536	2.96334	0.51986	3.4609	0.49731	3.43799	0.50124	3.25702	0.49522
1	adult	3.67832	0.53534	3.82075	0.59647	3.54281	0.65939	2.74031	0.51108	3.38883	0.48619	3.39887	0.50047	3.22467	0.5045
1	adult	3.75758	0.57814	3.73743	0.60429	3.55859	0.60215	2.8792	0.7086	3.62313	0.49551	3.40256	0.52512	3.21026	0.49714
1	adult	3.43833	0.5257	3.67943	0.54181	3.60651	0.53967	2.18108	0.89766	3.42435	0.42427	3.40761	0.56817	3.1964	0.46073
1	adult	3.63106	0.55149	3.63195	0.5756	3.50828	0.59388	3.16375	0.5685	3.57762	0.50411	3.43048	0.53508	3.39877	0.49032
1	adult	3.70061	0.57439	3.82943	0.52446	3.59221	0.57732	3.51692	0.56451	3.60126	0.45861	3.33261	0.51701	3.24137	0.46008
1	adult	0.53748	3.41767	0.56845	3.28638	0.5282	3.36102	0.61248	3.18478	0.93743	3.0084	0.32318	3.25544	0.56983	2.88373
1	adult	2.68518	1.95639	3.64302	0.70046	3.52597	0.78825	2.28051	2.27619	2.47483	1.84625	3.30122	0.60324	3.33622	0.48526
1	adult	3.34571	0.53375	0.26928	0.44435	0.27395	0.37623	0.40515	0.48198	0.33685	0.41846	0.72574	0.40893	0.33755	0.40374
1	adult	3.68831	0.53694	3.73911	0.56246	3.44931	0.59929	2.72629	0.53898	3.42269	0.50182	3.51947	0.5397	3.25072	0.47318
1	adult	3.63832	0.52079	3.81069	0.58661	3.56332	0.57089	2.77541	0.53507	3.48382	0.5002	3.45135	0.49803	3.19083	0.50462
1	adult	3.60318	0.52845	3.65752	0.53778	3.65815	0.54801	2.54722	0.50733	3.45528	0.46509	3.44302	0.51472	3.25415	0.47236
1	adult	3.06244	0.49555	3.61458	0.51593	2.99441	0.45946	1.99671	0.49535	3.36327	0.47656	2.99567	0.46771	2.34006	0.55282
1	adult	3.73119	0.56084	3.78771	0.54929	3.6039	0.57734	3.30107	0.5292	3.50942	0.48843	3.52273	0.5696	3.43058	0.52371
1	adult	3.64096	0.50581	3.7479	0.56081	3.54329	0.50171	3.17689	0.54859	3.39093	0.51564	3.426	0.51895	3.16895	0.48169
1	adult	3.59516	0.54272	3.78761	0.6462	3.48361	0.82524	3.26705	0.76107	3.44778	0.52056	3.33819	0.58885	2.26839	1.71509
1	adult	3.82119	0.56819	3.79942	0.59878	3.58449	0.70083	3.19838	0.58751	3.57442	0.51859	3.46356	0.55923	3.43356	0.47744
1	adult	3.69126	0.59255	3.72881	0.57688	3.52456	0.66651	2.92903	0.57296	3.46948	0.46679	3.45519	0.55275	3.4068	0.4964
1	adult	3.61068	0.5165	3.67459	0.60579	3.49029	0.54008	2.92601	0.59004	3.48247	0.5036	3.36222	0.54795	3.31797	0.45403
1	adult	3.52664	0.49209	3.70137	0.51586	3.58393	0.52135	2.50329	0.53135	3.37403	0.45635	3.40853	0.50916	3.20347	0.46238
1	adult	3.45888	0.49793	3.52282	0.56992	3.25955	0.49364	1.93895	0.48216	3.28806	0.50026	3.02354	0.54249	2.68348	0.51505
1	adult	0.4243	0.74407	0.27729	0.46348	0.26906	0.41793	0.32254	0.86509	3.51526	0.46886	0.7375	0.39096	0.35033	0.38771
1	adult	3.8207	0.58436	3.72427	0.5468	3.60326	0.60164	3.27533	0.74396	3.69476	0.53619	3.60937	0.52404	3.43678	0.47728
1	adult	2.13328	2.35664	3.60835	0.55886	3.44141	0.77573	1.874	2.20254	3.39437	0.49324	3.30603	0.68252	1.93434	2.05637
1	adult	3.70766	0.61235	3.78891	0.6039	3.49135	0.69617	3.28044	0.57509	3.44931	0.51624	3.42425	0.58209	3.45579	0.46336
1	adult	3.65468	0.53583	3.78948	0.59629	3.5353	0.64701	3.03362	0.54241	3.52231	0.52082	3.531	0.55815	3.35892	0.48744
1	adult	3.77221	0.56248	3.82604	0.5744	3.62529	0.64144	3.3301	0.61233	3.5268	0.49064	3.47629	0.56911	3.31715	0.46442
1	adult	3.6562	0.51604	3.73513	0.56565	3.41685	0.52243	2.97539	0.4948	3.4855	0.51242	3.3184	0.49293	3.15286	0.4593
1	adult	3.7954	0.58221	3.66851	0.61188	3.55933	0.63937	3.4455	0.67415	3.61604	0.50347	3.43006	0.56974	3.45241	0.48691
1	adult	4.13523	0.54019	3.81652	0.57748	3.55564	0.54811	3.17215	0.54329	3.60333	0.52478	3.50769	0.51949	3.27935	0.46984
1	adult	3.83547	0.57322	3.90056	0.57236	3.64862	0.60726	3.35899	0.54641	3.54887	0.53285	3.60043	0.57756	3.2938	0.47959
1	adult	2.04745	2.2131	3.68424	0.59704	2.25747	2.26245	2.26107	2.11778	3.45987	0.50891	3.43984	0.64342	2.33612	1.7238
1	adult	3.56115	0.72648	3.67945	0.59265	3.57641	0.72307	3.35556	0.62216	3.49459	0.5364	3.57923	0.59359	3.4015	0.47333
1	adult	3.31786	0.5439	3.77114	0.61665	3.52784	0.57204	3.0118	0.60298	3.287	0.81205	3.46811	0.51296	3.29576	0.51121
1	adult	3.65929	0.54639	3.78006	0.54793	3.6061	0.64836	3.30577	0.57662	3.46179	0.49068	3.46026	0.56803	3.323	0.51141
1	adult	3.72329	0.52261	3.64305	0.55296	3.58866	0.69847	3.37057	0.58295	3.57954	0.49803	3.49883	0.63681	3.33958	0.52826
1	adult	3.60956	0.47284	3.82957	0.57012	3.59504	0.59865	3.33693	0.51587	3.56235	0.51433	3.45082	0.52445	3.23888	0.45068
1	adult	3.39769	0.60333	0.26819	0.38184	0.28539	0.38245	0.58412	1.97533	0.34644	0.39099	0.72264	0.37342	0.3572	0.39289
1	adult	3.74553	0.56975	3.8798	0.587	3.65866	0.5906	3.3055	0.5254	3.5592	0.51264	3.42483	0.55346	3.35266	0.48025
1	adult	3.60969	0.56257	3.71586	0.59118	3.43549	0.67	3.27953	0.61586	3.44419	0.47773	3.2874	0.70297	3.31958	0.47049
1	adult	3.70861	0.56914	3.8038	0.562	3.43354	0.57134	3.21217	0.52722	3.57582	0.52949	3.50326	0.56232	3.31453	0.45955
1	adult	3.56317	0.52966	3.66534	0.51686	3.4512	0.52567	3.1863	0.51785	3.43413	0.52288	3.34978	0.50689	3.24992	0.46529
1	adult	3.85563	0.61094	3.90053	0.57369	3.64436	0.64764	3.39075	0.64522	3.59216	0.51369	3.55203	0.58491	3.39975	0.45083
1	adult	3.84703	0.4913	3.82157	0.52676	3.65344	0.52295	2.74787	0.89833	3.49046	0.49025	3.36846	0.4804	3.19895	0.46134
1	adult	3.84566	0.55174	3.92566	0.50423	3.73271	0.58779	3.26207	0.50371	3.54453	0.5004	3.62329	0.55982	3.45474	0.47157
1	adult	3.77493	0.59349	3.80034	0.51027	3.72335	0.60877	3.29655	0.78815	3.6277	0.48204	3.51204	0.51721	3.54062	0.47971
1	adult	3.62305	0.6714	3.91642	0.64962	3.61254	0.63757	2.90983	1.28737	3.61323	0.54499	3.58453	0.54908	3.3979	0.55415
1	adult	0.25148	3.75521	0.36005	3.52647	0.22977	3.70006	0.52059	3.44753	0.41139	3.37586	0.60619	3.24195	1.98024	2.07534
1	adult	3.49399	0.46742	3.55674	0.52804	3.43002	0.53825	1.91574	0.51658	3.32941	0.48729	3.3512	0.52341	3.22328	0.48208
1	adult	3.34346	0.43956	3.34231	0.50972	3.3937	0.48072	0.42695	0.40324	3.12252	0.4588	3.05804	0.44304	2.78792	0.4113
1	adult	3.5077	0.7985	3.71718	0.63122	3.56623	0.76618	2.62967	0.98257	3.5034	0.59361	3.20709	0.95028	3.16894	0.61786
1	adult	2.69501	0.43534	3.02347	0.41787	2.1851	0.36457	0.35541	0.3875	3.00153	0.43295	1.72807	0.40216	1.73443	0.39955
1	adult	3.67653	0.48458	3.67661	0.50518	3.43117	0.45479	1.97036	0.48204	3.43643	0.47496	3.21464	0.45999	2.92046	0.45012
1	adult	3.54371	0.6131	3.88395	0.57019	3.61779	0.57162	2.92247	1.36636	3.57023	0.53464	3.47447	0.55753	3.3295	0.48643
1	adult	3.68939	0.63992	4.03432	0.58865	3.74128	0.58989	3.21171	1.101	3.66822	0.52878	3.49455	0.59297	3.52647	0.46902
1	adult	3.53768	0.56928	3.85798	0.62946	3.32853	0.69968	3.30366	0.62002	3.34857	0.48888	3.38676	0.58233	3.19598	0.50163
1	adult	2.25076	2.25549	2.3996	2.1662	0.21428	3.54734	0.309	3.07832	2.44684	1.83071	1.96961	2.39931	1.61455	2.34559
1	adult	3.39271	0.51408	3.72552	0.54869	2.4525	1.93318	2.41639	0.51486	3.40572	0.50059	3.34724	0.54842	3.24235	0.47743
1	adult	3.46037	0.53401	3.88154	0.61555	3.41676	0.53231	2.47986	0.50166	3.39922	0.49141	3.46045	0.55107	3.15381	0.48818
1	adult	3.4765	0.46422	3.70135	0.55946	3.27551	0.46061	0.54765	0.44485	3.4413	0.46324	3.17471	0.44962	2.9216	0.46638
1	adult	3.68515	0.64467	3.73073	0.55615	3.56839	0.55539	3.13254	0.53776	3.61767	0.51383	3.43526	0.53578	3.36342	0.48294
1	adult	3.7683	0.55283	3.64309	0.54535	3.61661	0.59009	3.25935	0.52844	3.57776	0.50816	3.45425	0.54878	3.30854	0.49465
1	adult	0.5052	0.48944	0.47901	0.49634	0.46508	0.44309	0.49214	0.46341	0.48377	0.44195	0.94749	0.47738	0.54639	0.46105
1	adult	3.61482	0.72111	3.64089	0.61909	3.33005	0.74623	3.09916	0.78876	3.44212	0.52617	3.49425	0.60353	3.28795	0.50489
1	adult	3.59626	0.54458	3.86541	0.57027	3.53756	0.58479	1.15159	1.62309	2.16765	1.78274	3.44348	0.53395	2.18635	1.61377
1	adult	0.21819	3.71342	0.42637	3.5786	0.22602	3.52549	0.27777	2.98408	0.33864	3.39786	0.31586	3.14929	0.25528	3.24242
1	adult	3.68033	0.49495	3.67626	0.54163	3.64533	0.54789	2.41753	0.46351	3.59044	0.49841	3.50996	0.5043	3.14715	0.43222
1	adult	3.72158	0.48972	3.59721	0.5358	3.57293	0.45847	1.34371	0.45888	3.358	0.43188	3.1562	0.51736	3.12271	0.47921
1	adult	3.61859	0.6027	3.62439	0.55258	3.50788	0.5785	3.00306	0.75693	3.54746	0.47956	3.34764	0.61664	3.4156	0.51196
1	adult	0.19927	3.55546	0.24289	3.53034	3.28525	0.47682	0.31669	0.39293	0.32283	0.59384	0.37424	3.50347	0.26528	3.58484
1	adult	3.87837	0.52242	4.11094	0.54813	3.79342	0.56543	3.45923	0.52056	3.58955	0.50562	3.61829	0.53442	3.3612	0.47859
1	adult	3.58246	0.56951	3.60782	0.62766	3.43845	0.82451	3.23794	0.59442	3.36131	0.47531	3.33636	0.6207	3.28921	0.49582
1	adult	3.50228	0.52692	3.63016	0.55579	3.597	0.58847	2.41283	0.54982	3.38057	0.46216	3.37514	0.55274	3.21448	0.43929
1	adult	3.59186	0.61425	3.7196	0.59592	3.46989	0.57498	2.42975	0.52283	3.49799	0.52714	3.42663	0.53231	3.22855	0.50373
1	adult	3.47533	0.45409	3.53353	0.53625	3.08809	0.43202	0.42947	0.40627	3.1951	0.46365	2.87531	0.49272	2.58161	0.44167
1	adult	3.39077	0.65644	3.51805	0.67185	3.28669	0.57908	2.18955	0.51154	3.27034	0.61912	3.19568	0.63317	2.76187	0.51642
1	adult	3.64456	0.4965	3.63692	0.5907	3.51589	0.48434	1.87935	0.45397	3.23278	0.4753	3.24235	0.48947	2.97823	0.5109
1	adult	3.72421	0.55589	3.7277	0.5687	3.63348	0.58588	3.21702	0.55063	3.44308	0.58158	3.30661	0.65653	3.39449	0.45688
1	adult	3.60442	0.75792	3.78184	0.75162	3.50355	0.86213	2.7042	1.7285	3.44333	0.71201	3.34084	0.86665	3.24466	0.53173
1	adult	3.65095	0.47607	3.8451	0.61736	3.41273	0.74594	3.32065	0.60326	3.41951	0.5062	3.41228	0.59611	3.30917	0.44378
1	adult	2.17699	1.99082	2.52008	2.13187	3.344	0.56736	1.40567	1.98279	2.47383	1.66643	1.81936	2.43371	3.1818	0.49116
1	adult	3.62701	0.57608	3.85486	0.58089	3.5061	0.58545	2.97899	0.57947	3.4845	0.51914	3.25005	0.61207	3.32842	0.48246
1	adult	3.59922	0.49091	3.61734	0.53199	3.57077	0.51804	2.37798	0.47502	3.58348	0.51684	3.35273	0.46498	3.17097	0.45408
1	adult	3.58318	0.53618	3.7167	0.54272	3.52708	0.52631	2.72246	0.53158	3.44242	0.4689	3.44705	0.49502	3.26493	0.51129
1	adult	3.63181	0.55381	3.72101	0.50325	3.56948	0.58557	2.93499	0.92319	3.49929	0.54326	3.33297	0.56941	3.40238	0.49444
1	adult	3.74462	0.50188	3.75309	0.54368	3.70275	0.62085	2.99508	0.98754	3.59037	0.51994	3.49176	0.52439	3.46974	0.45817
1	adult	3.76047	0.50195	3.8693	0.563	3.72843	0.60972	3.3479	0.5564	3.48533	0.52031	3.47882	0.54882	3.28795	0.49125
1	adult	3.60033	0.56616	3.7927	0.61697	3.52543	0.70822	3.36003	0.58068	3.51311	0.52484	3.36554	0.55113	3.23163	0.47305
1	adult	3.62599	0.53436	3.62984	0.53818	1.95441	2.23737	2.0096	0.52258	2.16638	1.63973	3.32425	0.62676	1.77455	1.89492
1	adult	3.6385	0.53888	3.71135	0.60667	3.54075	0.70213	3.22211	0.59738	3.42372	0.45113	3.31434	0.59542	3.17853	0.48126
1	adult	3.54332	0.46248	3.64441	0.53929	3.46148	0.52239	2.54776	0.45439	3.48513	0.5161	3.22257	0.50305	3.25051	0.46787
1	adult	3.5758	0.51521	3.57472	0.48187	3.41779	0.42862	0.73397	0.43476	3.35466	0.46496	3.10242	0.45101	2.83648	0.4234
1	adult	3.57855	0.60302	3.63471	0.57195	3.28383	0.75729	2.72615	1.1311	3.54407	0.57624	3.42891	0.59034	3.33859	0.49545
1	adult	3.6909	0.56914	3.91322	0.5713	3.60181	0.56484	3.31106	0.50877	3.54966	0.47532	3.47564	0.523	3.36235	0.48211
1	adult	3.48342	0.49406	3.4981	0.49864	3.06234	0.46488	2.35617	0.49872	3.18436	0.45667	3.16068	0.5031	2.93953	0.43255
1	adult	3.61946	0.50376	3.71669	0.60476	3.44456	0.67178	3.14348	0.56825	3.32758	0.56109	3.35473	0.54144	3.18537	0.48419
1	adult	3.59231	0.533	3.65266	0.64556	3.26873	0.58991	2.62724	1.00184	3.44902	0.54429	3.21328	0.78196	3.23016	0.52386
1	adult	3.52681	0.58851	3.59134	0.67195	3.42092	0.76877	2.34412	1.56223	3.48928	0.63938	2.93445	1.25845	3.10413	0.65786
1	adult	3.59248	0.617	3.7281	0.59619	3.4102	0.64579	3.1214	0.58901	3.52178	0.46709	3.46092	0.48992	3.35017	0.46956
1	adult	3.61321	0.53242	3.77041	0.51835	3.55053	0.55356	2.78865	0.52023	3.50506	0.4657	3.32106	0.53	3.19029	0.46697
1	adult	3.71743	0.52828	3.64488	0.52226	3.46913	0.61897	3.13161	0.53188	3.47505	0.51937	3.39739	0.56926	3.30414	0.51895
1	adult	3.52604	0.52551	3.434	0.57692	3.10136	0.437	2.33984	0.44548	3.27624	0.45025	2.9162	0.55661	2.84969	0.48406
1	adult	3.77404	0.54583	3.93654	0.55604	3.66715	0.54184	3.25279	0.53941	3.52227	0.50139	3.42359	0.4813	3.22405	0.46223
1	adult	3.56204	0.55381	3.68507	0.64469	3.45632	0.79724	3.24509	0.63011	3.35164	0.61271	3.38957	0.62503	3.47755	0.49227
1	adult	3.7862	0.54652	3.79981	0.56886	3.46141	0.69487	3.01316	0.65854	2.45445	1.83917	3.48158	0.54198	1.92314	2.0171
1	adult	3.56969	0.51691	3.84139	0.59714	3.43304	0.64189	2.05138	0.56488	3.48542	0.49467	3.10331	0.53297	2.88594	0.46672
1	adult	3.54638	0.58813	3.82338	0.64989	2.79614	0.50498	2.89574	0.54614	3.53842	0.52806	3.30483	0.49584	3.30765	0.4801
1	adult	3.68207	0.52846	3.63731	0.56362	3.47751	0.50909	2.60702	0.50186	3.53363	0.50858	3.41061	0.4878	3.31061	0.51092
1	adult	3.61096	0.61526	3.78484	0.58963	3.60462	0.6246	3.17293	0.57632	3.59715	0.51906	3.50263	0.5584	3.5166	0.50271
1	adult	3.56049	0.48109	3.83176	0.53334	3.60591	0.48237	3.16208	0.49451	3.51907	0.48315	3.42597	0.46109	3.08183	0.44864
1	adult	3.79354	0.5877	3.95017	0.60654	3.57279	0.55303	3.31028	0.49721	3.54045	0.51622	3.50849	0.48759	3.41807	0.50523
1	adult	3.55598	0.62539	3.59947	0.66649	3.42701	0.82813	3.33813	0.70463	3.48115	0.52421	3.37135	0.61023	3.45833	0.50756
1	adult	3.70737	0.54369	3.77109	0.57331	3.4358	0.6286	3.28965	0.62536	3.47305	0.46893	3.32744	0.54751	3.36396	0.45902
1	adult	3.78377	0.61128	3.72313	0.63012	3.59558	0.64665	3.06334	0.56148	3.48219	0.57338	3.20957	0.76583	3.23725	0.49017
1	adult	3.59403	0.56326	3.75284	0.59931	3.60382	0.66003	3.05622	0.57882	3.62029	0.51084	3.50356	0.58443	3.50963	0.49197
1	adult	3.5094	0.46571	3.60703	0.51332	3.55532	0.47632	2.5979	0.47463	3.50689	0.46198	3.52238	0.50505	3.02891	0.44398
1	adult	3.52826	0.50368	3.67111	0.58047	3.6297	0.54603	3.05361	0.50024	3.54438	0.48224	3.50447	0.48509	3.16063	0.47725
1	adult	3.68265	0.54404	3.79762	0.54089	3.72434	0.54222	3.21522	0.53342	3.82491	0.54587	3.50271	0.48689	3.26543	0.44965
1	adult	3.54554	0.5122	3.61796	0.50093	3.43836	0.48796	2.55535	0.49785	3.33593	0.4991	3.22866	0.45011	2.88792	0.48003
1	adult	3.54681	0.53629	3.63628	0.53951	3.48393	0.59902	3.08551	0.56488	3.34732	0.58791	3.24351	0.51241	3.22836	0.47965
1	adult	3.67086	0.53641	3.87733	0.60961	3.60722	0.65852	3.25832	0.5328	3.60622	0.5314	3.29329	0.65629	3.31531	0.51294
1	adult	3.83404	0.53455	3.83775	0.58758	3.51886	0.68526	3.23004	0.56684	3.53676	0.50524	3.44572	0.543	3.42082	0.514
1	adult	3.87154	0.48624	3.7955	0.51845	3.57222	0.54143	2.99634	0.49731	3.47753	0.49735	3.32066	0.52207	3.0951	0.43662
1	adult	0.37931	1.03724	0.24294	0.38179	3.55238	0.55127	0.29427	1.5069	3.48505	0.46517	0.7723	0.48361	0.35184	0.3881
1	adult	3.80478	0.52667	3.8554	0.5943	3.55348	0.64861	3.52188	0.54957	3.6347	0.51092	3.52013	0.54867	3.40602	0.47671
1	adult	3.8004	0.50537	3.83486	0.52532	3.647	0.5894	3.49793	0.56027	3.51598	0.48249	3.5843	0.53183	3.45894	0.49138
1	adult	3.75673	0.66556	3.83276	0.58454	3.61955	0.67225	3.40559	0.65974	3.70528	0.57844	3.52964	0.61722	3.56372	0.50708
1	adult	0.25269	3.91133	0.4064	3.71473	0.21367	3.69637	0.51378	3.18293	0.43651	3.27348	0.55179	3.12588	0.33131	3.33772
1	adult	3.53762	0.56941	3.73807	0.65135	3.41374	0.79374	3.42753	0.59011	3.35279	0.51351	3.47128	0.62443	3.42312	0.50382
1	adult	3.76189	0.72434	3.86058	0.69397	3.66377	0.76356	3.24403	0.99902	3.37392	0.49441	3.37373	0.67961	3.59395	0.53859
1	adult	3.75287	0.51273	3.77289	0.56519	3.44633	0.58179	3.25618	0.5194	3.62993	0.49892	3.32699	0.55942	3.34057	0.4694
1	adult	3.69531	0.55363	3.75941	0.70778	3.48355	0.76126	3.4112	0.59657	3.59875	0.51853	3.37267	0.59177	3.42363	0.49762
1	adult	3.69378	0.53311	3.89332	0.60975	3.67602	0.59713	3.24344	0.52293	3.5839	0.5344	3.59045	0.55005	3.27644	0.48488
1	adult	3.73763	0.46449	3.63871	0.52341	3.61673	0.48484	2.86041	0.48753	3.4962	0.48221	3.36759	0.44518	3.07468	0.4573
1	adult	3.69187	0.56097	3.79672	0.57553	3.64416	0.6837	3.1341	1.11948	3.50426	0.54184	3.39973	0.5832	3.46805	0.51057
1	adult	2.83509	0.70272	3.15599	0.43605	2.48275	0.41327	0.67103	0.49674	2.63319	0.46144	2.40854	0.44942	2.28944	0.42495
1	adult	3.71126	0.60229	3.61765	0.52074	3.71603	0.6268	3.44677	0.5323	3.58297	0.50085	3.4972	0.64101	3.19376	0.50119
1	adult	3.55325	0.56969	3.85455	0.55614	3.55837	0.51327	3.15034	0.46161	3.51447	0.48526	3.43384	0.56336	3.25361	0.48428
1	adult	3.84608	0.68012	3.8235	0.58294	3.60123	0.63803	3.39861	0.55487	3.60232	0.512	3.5219	0.57879	3.54454	0.49897
1	adult	3.80691	0.75695	3.92951	0.56038	3.70927	0.62314	3.47692	0.53062	3.60406	0.5177	3.45598	0.58863	3.45145	0.52523
1	adult	0.24568	3.72673	0.23722	3.57479	0.22749	3.48452	0.42098	3.35804	0.36002	3.26737	0.4696	3.28448	0.28997	3.28808
1	adult	3.74581	0.66954	3.95617	0.52015	3.74865	0.56726	3.2196	0.82202	3.62264	0.50364	3.62716	0.57129	3.38577	0.4927
1	adult	0.2605	3.71092	0.35543	3.70849	0.20665	3.70656	0.29998	3.38013	0.46945	3.41141	0.71876	3.23382	0.3168	3.39268
1	adult	3.72438	0.54312	3.6013	0.54387	3.60666	0.53515	2.5308	0.49025	3.48236	0.48928	3.43659	0.51237	3.14375	0.40154
1	adult	3.36469	0.47709	3.61659	0.50752	3.62571	0.57853	1.88923	0.48265	3.40521	0.45437	3.38402	0.49937	2.99349	0.45482
1	adult	3.61892	0.6065	3.80598	0.61508	3.56478	0.67819	3.06058	0.60893	3.53867	0.50595	3.42441	0.58163	3.35607	0.47698
1	adult	3.64164	0.61187	3.62239	0.55248	3.65574	0.62798	3.19227	0.54938	3.74209	0.50788	3.39793	0.5741	3.38929	0.51428
1	adult	3.79263	0.60126	3.94383	0.57994	3.54569	0.58436	3.32967	0.51889	3.63475	0.50405	3.37813	0.53266	3.37708	0.47238
1	adult	3.37757	0.45938	3.23344	0.46435	2.8122	0.40889	1.38364	0.46504	3.17635	0.46949	2.8514	0.41659	2.57051	0.43192
1	adult	3.68948	0.52927	3.98043	0.54445	3.68398	0.57156	3.24864	0.66789	3.62405	0.48131	3.55047	0.5062	3.33982	0.48204
1	adult	0.2601	3.73653	0.36502	3.6951	0.22668	3.65401	0.44991	3.47136	0.44193	3.32485	0.701	3.29535	0.32156	3.41247
1	adult	3.60546	0.53095	3.79862	0.55939	3.43289	0.57406	2.7156	0.53755	3.4257	0.51858	3.47405	0.55802	3.38474	0.45036
1	adult	3.62273	0.50958	3.77404	0.56919	3.59034	0.58067	1.90642	0.46907	3.44204	0.51667	3.43273	0.51516	3.23599	0.47877
1	adult	3.67787	0.56548	3.66289	0.52733	3.47579	0.52481	1.9715	0.51839	3.30838	0.50726	3.35088	0.4989	3.32816	0.47248
1	adult	3.57998	0.52997	3.80888	0.5114	3.5241	0.5587	2.43252	0.45999	3.47733	0.46019	3.50983	0.57861	3.24702	0.44637
1	adult	3.64974	0.58381	3.68554	0.5357	3.61944	0.55456	2.46698	0.5137	3.56509	0.48037	3.38278	0.52507	3.19862	0.52738
1	adult	3.67577	0.54082	3.57897	0.49638	3.55308	0.54326	3.19136	0.5587	3.57493	0.49673	3.25128	0.52096	3.31425	0.49911
1	adult	0.19271	3.6197	1.95727	2.79922	0.2024	3.66294	1.81263	2.59049	2.53563	1.81206	1.80048	2.64791	0.26615	3.4286
1	adult	0.26634	3.808	0.32244	3.75718	0.20168	3.59417	0.41338	3.33406	0.42339	3.3453	0.60855	3.44346	0.33028	3.51632
1	adult	2.67652	0.45295	3.33316	0.4872	2.72989	0.4197	0.3915	0.47743	2.93001	0.45898	2.53557	0.43495	2.40858	0.41108
1	adult	0.3569	0.56818	0.29428	0.50685	0.29406	0.42273	0.44237	1.24907	2.90114	0.44278	0.48919	0.4397	0.25862	3.14495
1	adult	3.72687	0.61615	3.60668	0.56465	3.73044	0.64053	3.14059	0.58909	3.53016	0.51458	3.47608	0.53092	3.37088	0.48286
1	adult	3.58506	0.59421	3.5972	0.56214	3.55785	0.60181	2.84608	0.56825	3.51	0.54666	3.32313	0.63878	3.3394	0.4913
1	adult	3.58835	0.50776	3.816	0.55321	3.61872	0.53726	2.01403	0.47121	3.4331	0.48318	3.43304	0.4708	3.16494	0.45086
1	adult	3.51727	0.5965	3.74388	0.5692	3.72743	0.57548	3.23205	0.55402	3.61497	0.53289	3.46357	0.49781	3.46211	0.46532
1	adult	0.21414	3.60815	0.26918	3.89491	0.19159	3.5562	0.3074	3.52682	0.28689	3.98838	0.37609	3.47457	0.28714	3.3631
1	adult	0.34687	3.43018	0.35892	3.83944	0.1988	3.55094	0.41316	3.45293	0.42957	3.3325	0.62316	3.4544	0.35771	3.53894
1	adult	2.00813	0.46688	3.11156	0.4514	2.65125	0.43196	0.407	0.53127	2.68532	0.43742	1.33057	0.44839	2.20833	0.4237
1	adult	3.62401	0.53883	3.66767	0.57575	3.55125	0.65251	2.77929	0.53883	3.56014	0.51348	3.50084	0.55384	3.22308	0.48443
1	adult	3.61623	0.55655	3.76116	0.58899	3.5136	0.55967	2.97766	0.58139	3.44681	0.52135	3.43067	0.55609	3.29337	0.48354
1	adult	3.77344	0.54547	3.70262	0.56361	3.51717	0.60748	3.15855	0.56093	3.50908	0.51108	3.33051	0.58842	3.50443	0.51284
1	adult	3.76798	0.57188	3.71387	0.5666	3.52838	0.59623	2.96883	0.54095	3.51479	0.49218	3.36928	0.53751	3.24793	0.46462
1	adult	3.57633	0.50218	3.63525	0.50176	3.49973	0.51592	2.53435	0.47646	3.41881	0.52335	3.32308	0.4812	3.11336	0.48423
1	adult	0.22181	3.75745	0.21818	3.76976	0.20813	3.71751	0.29088	3.34131	0.34443	3.40085	0.24504	2.64639	0.27731	3.47599
1	adult	0.26598	3.82747	0.40827	3.79273	0.22243	3.73072	0.56268	3.56689	0.47326	3.26612	0.74507	3.2527	0.36708	3.46367
1	adult	3.4309	0.50689	3.44956	0.51639	3.03403	0.43995	0.45306	0.49289	3.06335	0.47749	2.67812	0.43441	2.57901	0.43524
1	adult	3.61209	0.54683	3.65173	0.54744	3.64849	0.66948	3.03529	0.57904	3.5379	0.51083	3.48483	0.52016	3.35094	0.47874
1	adult	3.34573	0.48588	3.51764	0.553	3.26327	0.48124	1.02793	0.50402	3.29097	0.47537	3.10053	0.46563	2.92225	0.48509
1	adult	3.35898	0.48706	3.58837	0.54916	3.47138	0.49452	0.80563	0.45009	3.10984	0.45898	3.1114	0.4543	2.93489	0.43448
1	adult	3.74528	0.63286	3.76143	0.56475	3.59134	0.59391	3.16965	0.57977	3.57427	0.53346	3.55107	0.53593	3.30709	0.47425
1	adult	3.59855	0.60815	3.69097	0.58175	3.46182	0.65661	3.22985	0.57308	3.59568	0.49478	3.53672	0.55763	3.61317	0.48339
1	adult	0.20311	3.62814	0.2358	3.73336	0.21046	3.71133	0.34019	3.36767	0.34342	3.32615	0.46147	3.40367	0.29736	3.49909
1	adult	0.25081	3.82187	0.34914	3.77919	0.21685	3.77122	0.42609	3.45825	0.41416	3.30452	0.54799	3.53725	0.34539	3.45039
1	adult	3.64892	0.53358	3.74774	0.5762	3.49799	0.61329	3.1098	0.53441	3.423	0.50021	3.50026	0.55804	3.30832	0.55042
1	adult	3.59937	0.55305	3.76491	0.51562	3.425	0.54397	2.63935	0.50403	3.40653	0.45179	3.34997	0.52243	3.1829	0.46808
1	adult	3.65005	0.57239	3.75152	0.58047	3.54478	0.60264	3.17746	0.56332	3.5095	0.48107	3.52062	0.56765	3.31704	0.46584
1	adult	3.66519	0.5412	3.75594	0.5464	3.53868	0.53439	2.78675	0.52832	3.42976	0.48409	3.53547	0.5328	3.19713	0.45906
1	adult	3.38157	0.48174	3.6723	0.57073	3.28202	0.45136	2.15719	0.4361	3.43836	0.46734	3.33801	0.49604	2.66531	0.59133
1	adult	3.62089	0.56746	3.85014	0.54719	3.44741	0.50668	3.18257	0.5274	3.62613	0.51201	3.50707	0.54495	3.49521	0.50536
1	adult	0.24181	3.74063	0.26873	3.85867	0.34954	3.55153	0.36164	3.52325	0.33082	3.45396	0.42013	3.36462	0.30921	3.31674
1	adult	0.24036	3.77493	0.38445	3.81085	0.21064	3.59571	0.45341	3.45659	0.43849	3.40083	0.59957	3.14797	0.3331	3.3994
1	adult	3.36766	0.42665	3.60625	0.53226	3.30225	0.48	2.76491	0.52206	3.36731	0.51935	3.05353	0.62113	3.04778	0.4523
1	adult	2.24436	2.28096	3.66852	0.59112	2.102	2.16421	2.89381	0.64338	2.33548	1.8255	3.40635	0.54465	3.38791	0.46774
1	adult	3.58602	0.57923	3.7903	0.60353	3.58118	0.63171	3.05577	0.56569	3.47817	0.50107	3.45786	0.53251	3.29028	0.49198
1	adult	3.57853	0.55656	3.77391	0.55969	3.56767	0.59716	2.96472	0.53916	3.50112	0.4949	3.42989	0.53975	3.36865	0.4689
1	adult	3.57286	0.5507	3.69455	0.58821	3.55871	0.58658	3.34585	0.61529	3.4698	0.49848	3.45946	0.54679	3.46283	0.51121
1	adult	3.72874	0.56368	3.76321	0.5935	3.62553	0.59209	3.22635	0.54086	3.46906	0.49054	3.60846	0.56479	3.32473	0.48623
1	adult	0.25741	3.65752	0.29802	3.73999	0.19574	3.75299	0.32632	3.40368	0.33625	3.28167	0.38443	3.44964	0.26447	3.33593
1	adult	0.24918	3.58885	0.41144	3.71304	0.21508	3.78697	0.51693	3.30837	0.46849	3.32213	0.79115	3.33493	0.35974	3.48214
1	adult	3.62484	0.5295	3.62912	0.57846	3.63005	0.71489	3.1648	0.59007	3.60073	0.55432	3.44354	0.54929	3.36731	0.47039
1	adult	3.54793	0.54306	3.82079	0.56722	3.58231	0.58631	2.90441	0.51238	3.58578	0.51267	3.41113	0.51827	3.33869	0.49057
1	adult	3.4879	0.52546	3.73495	0.57049	3.46661	0.52977	2.24829	0.46462	3.50981	0.50238	3.27782	0.47149	3.15207	0.4614
1	adult	3.71434	0.54774	3.76631	0.69236	3.50179	0.56874	2.99076	0.5474	3.42317	0.50452	3.33464	0.61631	3.34586	0.44224
1	adult	3.77334	0.58878	3.67637	0.54138	3.61894	0.6331	3.23629	0.58579	3.52278	0.50814	3.44405	0.62223	3.40251	0.44199
1	adult	0.22491	3.67489	0.26393	3.74418	0.18839	3.61976	0.4245	3.38811	0.33513	3.31352	0.39877	3.27904	0.27422	3.36034
1	adult	0.22061	3.7202	0.23527	3.62108	0.19561	3.61048	0.3211	3.3749	0.34614	3.36932	0.39301	3.44431	0.26892	3.39334
1	adult	0.25179	3.81211	0.4593	3.60436	0.20926	3.63208	0.5248	3.30761	0.48502	3.34914	0.75188	3.30983	0.37502	3.53556
1	adult	3.75069	0.60871	3.73759	0.6489	3.53759	0.77603	3.38542	0.58256	3.5718	0.50119	3.41968	0.59003	3.412	0.48639
1	adult	3.52191	0.52348	3.69809	0.57993	3.53627	0.53552	2.6147	0.75977	3.49225	0.48075	3.459	0.56912	3.20597	0.51384
1	adult	3.69722	0.54393	3.64777	0.54393	3.42177	0.57278	2.6519	0.53987	3.40891	0.50875	3.40387	0.50388	3.14937	0.45755
1	adult	3.54648	0.5718	3.8675	0.63382	3.53134	0.624	3.10599	0.57387	3.48615	0.54536	3.38409	0.57085	3.47329	0.49377
1	adult	3.53407	0.50668	3.73301	0.58319	3.41	0.52234	2.38608	0.59048	3.38125	0.48645	3.19804	0.4828	2.99227	0.46674
1	adult	3.69499	0.51372	3.74895	0.54643	3.7036	0.62063	3.302	0.55378	3.61531	0.52038	3.63819	0.57777	3.42394	0.50892
1	adult	0.22684	3.802	0.24741	3.55592	0.20047	3.57178	0.35188	3.4721	0.33931	3.37491	0.43227	3.31706	0.29457	3.39416
1	adult	0.46574	0.57311	0.33395	0.46109	0.28882	0.54277	0.4923	1.47118	0.44881	0.41593	0.72827	0.39697	0.34818	0.42338
1	adult	3.61166	0.59802	3.73748	0.62178	3.52928	0.73734	3.39524	0.59973	3.46943	0.48342	3.48033	0.58635	3.37147	0.48072
1	adult	3.5443	0.51517	3.64509	0.53318	3.45899	0.54606	2.93254	0.52514	3.50511	0.50161	3.34108	0.53636	3.29513	0.48103
1	adult	3.60552	0.4972	3.70302	0.52899	3.63534	0.55142	2.67659	0.5061	3.47376	0.4875	3.35637	0.47451	3.4009	0.46865
1	adult	3.82661	0.55052	3.70558	0.57339	3.761	0.64137	3.38943	0.58233	3.64017	0.50737	3.52435	0.54861	3.5411	0.52328
1	adult	3.51756	0.47547	3.52444	0.51866	3.35593	0.41142	1.89786	0.40632	3.26089	0.43967	2.98654	0.45217	2.74892	0.38925
1	adult	3.75702	0.58526	3.80191	0.61238	4.03415	0.7379	3.59452	0.55421	3.58884	0.51319	3.56416	0.56529	3.48094	0.45588
1	adult	0.20889	3.57544	0.27538	3.54062	0.18861	3.63336	0.39741	3.34616	0.36645	3.46249	0.51571	3.4136	0.26557	3.43478
1	adult	0.23106	3.72553	0.43464	3.77612	0.21433	3.78802	0.67285	3.36571	0.48449	3.38547	0.69229	3.21857	0.33656	3.43119
1	adult	3.66335	0.55557	3.65592	0.57578	3.46232	0.69516	3.40486	0.5796	3.37595	0.47934	3.41059	0.57395	3.40822	0.48543
1	adult	3.42366	0.48324	3.74148	0.58708	3.49716	0.54032	2.99409	0.52006	3.44476	0.51835	3.24096	0.4927	2.9991	0.46535
1	adult	3.688	0.52264	3.68914	0.55379	3.62013	0.63298	3.01528	0.96081	3.45181	0.50532	3.37989	0.57445	3.24657	0.47939
1	adult	3.81687	0.64768	3.7394	0.66904	3.46064	0.74666	3.41002	0.54813	3.6539	0.52927	3.50323	0.5653	3.52661	0.48673
1	adult	3.68034	0.52175	3.79565	0.61386	3.58028	0.70406	3.42174	0.54935	3.3436	0.59887	3.43689	0.58914	3.51126	0.50156
1	adult	3.82357	0.57227	3.83956	0.59181	3.60765	0.65991	3.45444	0.53944	3.48772	0.46947	3.40883	0.56955	3.50958	0.48147
1	adult	0.20069	3.61632	0.31617	3.69585	0.20371	3.74366	0.41256	3.3863	0.35435	3.34741	0.58321	3.31815	0.30368	3.36526
1	adult	0.2494	3.72754	0.51131	3.84522	0.27989	3.58378	0.62566	3.33788	0.54172	3.45873	0.95751	3.14335	0.40057	3.42032
1	adult	0.23345	3.59456	0.34821	3.56559	0.21349	3.74157	0.42561	3.25556	0.34919	3.35014	0.5296	3.23111	0.28318	3.49076
1	adult	0.24936	3.34052	0.26289	3.47292	0.27419	2.4726	0.33593	1.47337	0.30677	3.01656	0.38925	3.07782	0.30453	2.73868
1	adult	0.23805	3.80344	0.24873	3.72183	0.20616	3.71987	0.28269	3.31805	0.31643	3.20964	0.4208	3.26613	0.2665	3.43449
1	adult	0.21831	3.70563	0.23716	3.55114	0.20211	3.59527	0.30005	3.36409	0.32996	3.2427	0.43656	3.55049	0.28357	3.43595
1	adult	0.20935	3.72656	0.23019	3.59697	0.19768	3.62803	0.27199	3.53281	0.32931	3.50303	0.39477	3.42075	0.28273	3.43973
1	adult	0.20897	3.66191	0.23415	3.6013	0.18989	3.63086	0.28785	3.41717	0.33805	3.36973	0.38801	3.21924	0.26211	3.35834
1	adult	0.23319	3.90254	0.23086	3.5935	0.19704	3.66281	0.33068	3.48912	0.37835	3.49487	0.47955	3.42873	0.27355	3.36811
1	adult	0.26893	3.72946	0.32525	3.60895	0.21572	3.65799	0.40223	3.36133	0.41751	3.15745	0.61677	3.25336	0.31763	3.44536
1	adult	2.27454	2.2817	3.75247	0.5628	3.57625	0.70167	1.51554	2.14603	3.56084	0.51039	3.48777	0.6123	3.25175	0.43265
1	adult	0.2187	3.67306	0.271	3.66818	0.19208	3.59034	0.3033	3.25839	0.33863	3.38183	0.50228	3.52696	0.26423	3.2388
1	adult	0.21877	3.6404	0.33179	3.55727	0.20957	3.57466	0.27544	3.12522	0.33852	3.30052	0.36856	3.20751	0.26411	3.39095
1	adult	0.21732	3.78863	0.23527	3.60547	0.19213	3.50231	0.29193	3.19481	0.32274	3.19671	0.39699	3.29099	0.26034	3.31905
1	adult	0.19522	3.67102	0.24951	0.42311	0.18615	3.51529	0.2447	3.00907	0.34445	3.39684	0.29619	3.40568	0.25556	3.27399
1	adult	0.22845	3.64248	0.22074	3.5839	0.22435	3.68756	0.2926	3.2742	0.30363	3.39022	0.3043	3.42024	0.30507	3.28471
1	adult	0.20826	3.54527	0.21892	3.79941	0.26762	0.90778	0.25764	3.3213	0.3432	0.38642	0.74646	0.40235	0.35449	0.39612
1	adult	0.2277	3.83768	0.27608	3.83893	0.20774	3.71025	0.33989	3.44619	0.38802	3.38581	0.42049	3.41013	0.29257	3.41178
1	adult	0.21644	3.61856	0.26621	3.67444	0.19843	3.47228	0.32981	3.24487	0.34388	3.09211	0.38475	3.21723	0.28266	3.2972
1	adult	0.22403	3.65108	0.27592	3.62108	0.21522	3.68854	0.28528	3.07977	0.32739	3.35989	0.39064	3.38248	0.26527	3.30766
1	adult	2.23355	2.20206	2.54535	2.1135	1.9891	2.35057	1.24365	1.91603	2.51172	1.6919	1.96574	2.47492	1.86298	1.83446
1	adult	0.20912	3.5115	0.24176	3.55751	0.18687	3.69811	0.30619	3.29094	0.31189	3.29003	0.42531	3.3556	0.28291	3.4762
1	adult	0.21854	3.5531	0.23975	3.68786	0.19412	3.49112	0.28865	3.21424	0.31396	3.405	0.35486	3.28309	0.26209	3.3644
1	adult	0.20587	3.77948	0.23716	3.80258	0.20556	3.782	0.29837	3.4421	0.31571	3.3879	0.38549	3.42611	0.29797	3.43584
1	adult	0.22722	3.69924	0.2424	3.66512	0.22869	3.526	0.27625	3.32728	0.30924	3.19451	0.31507	3.39515	0.27853	3.31907
1	adult	0.25554	3.66237	0.26124	3.80124	0.22443	3.69316	0.30646	3.36219	0.31407	3.46599	0.3712	3.3659	0.31565	3.16493
1	adult	0.22313	3.54192	0.26173	3.59687	0.20814	3.56229	0.33167	3.26613	0.41696	3.20232	0.43644	3.28358	0.28071	3.3068
1	adult	0.21067	3.54113	0.24186	3.71143	0.19704	3.49892	0.28066	2.63018	0.30124	3.29894	0.31287	3.48183	0.26155	3.33154
1	adult	0.21476	3.79509	0.32963	3.67175	0.19286	3.47541	0.30223	3.17131	0.34435	3.48088	0.34856	3.37071	0.26979	3.50656
1	adult	0.20495	3.7592	0.24075	3.73311	0.19316	3.54501	0.25944	3.12656	0.30535	3.3187	0.35828	3.40273	0.25249	3.35825
1	adult	0.22136	3.85331	0.23402	3.82967	0.1852	3.53126	0.27663	3.37935	0.317	3.38458	0.2978	3.18277	0.26423	3.25053
1	adult	0.22691	3.64396	0.23055	3.92376	0.23756	3.70842	0.47469	2.98218	0.29115	3.35877	0.33809	3.35699	0.29235	3.12761
1	adult	0.21578	3.65946	0.29949	3.57589	0.22351	3.74224	0.28995	3.58287	0.3368	3.42152	0.32353	3.3357	0.28425	3.16066
1	adult	0.21368	3.689	0.33113	3.7569	0.20205	3.61485	0.39512	3.32626	0.47232	3.29215	0.54701	3.43151	0.30489	3.43564
1	adult	0.22168	3.62965	0.28226	3.56634	0.20133	3.55666	0.38094	3.20731	0.35882	3.25377	0.45688	3.42879	0.26866	3.3862
1	adult	0.2268	3.65866	0.27892	3.47361	0.19571	3.40952	0.29454	3.22025	0.32716	3.29622	0.34441	3.3048	0.25449	3.38474
1	adult	0.22364	3.73166	0.24561	3.72309	0.19595	3.66166	0.29269	3.31602	0.34539	3.39849	0.34633	3.22096	0.25286	3.23311
1	adult	0.21531	3.72965	0.24923	3.73584	0.19442	3.68808	0.29191	3.29373	0.31545	3.35084	0.36009	3.37458	0.26788	3.36594
1	adult	0.2129	3.63828	0.22875	3.57585	0.19075	3.58944	0.31614	3.21024	0.34569	3.5324	0.35794	3.48167	0.27661	3.32905
1	adult	0.21167	3.75802	0.22078	3.67549	0.20202	3.48187	0.29406	3.42808	0.30843	3.37244	0.33589	3.36466	0.28589	3.4441
1	adult	0.21159	3.73837	0.22749	3.74037	0.20365	3.57258	0.27247	3.5882	0.30322	3.36429	0.29999	3.29636	0.30353	3.16072
1	adult	0.248	3.77621	0.30807	3.77347	0.22655	3.78381	0.38555	3.47134	0.39639	3.25234	0.49306	3.43511	0.34323	3.41573
1	adult	0.26174	3.67509	0.26509	3.61866	0.20108	3.66291	0.3246	3.20718	0.33268	3.23214	0.38702	3.40223	0.26844	3.33507
1	adult	0.22962	3.57383	0.24166	3.62529	0.21955	3.4721	0.31052	2.61743	0.29525	3.23276	0.33324	3.34362	0.27696	3.21962
1	adult	0.21948	3.68179	0.27616	3.75633	0.19771	3.65494	0.30556	3.20368	0.33645	3.34367	0.38222	3.34267	0.27144	3.42254
1	adult	0.22817	3.70973	0.25674	3.871	0.20568	3.85947	0.28768	3.11457	0.29188	3.23613	0.31579	3.19493	0.2707	3.30283
1	adult	0.22474	3.6972	0.2485	3.71387	0.19491	3.51452	0.28008	3.17536	0.38484	3.29662	0.31601	3.38796	0.28302	3.30105
1	adult	0.21313	3.68979	0.2334	3.70576	0.19413	3.73021	0.27799	3.21019	0.33806	3.30308	0.32597	3.46643	0.28107	3.46352
1	adult	0.20891	3.82519	0.23668	3.83264	0.19864	3.56829	0.31125	3.46414	0.32581	3.32547	0.35471	3.32803	0.29289	3.42437
1	adult	0.27855	3.57807	0.28204	3.45499	0.28175	3.57588	0.31082	3.12725	0.35673	3.20651	0.40453	3.22768	0.34244	3.00934
1	adult	0.21107	3.74286	0.27165	3.65027	0.19579	3.63588	0.36627	3.19887	0.35885	3.38602	0.38476	3.24559	0.27548	3.37144
1	adult	0.20393	3.62621	0.24433	3.57895	0.19241	3.52711	0.28722	3.06755	0.32566	3.32649	0.33654	3.18872	0.29107	3.25612
1	adult	0.21361	3.76441	0.26194	3.87583	0.20154	3.64742	0.37172	3.07204	0.33354	3.42739	0.38249	3.36748	0.25909	3.36464
1	adult	0.2169	3.78934	0.24457	3.61339	0.18852	3.63019	0.29305	3.18608	0.32545	3.43411	0.35898	3.42914	0.26906	3.34518
1	adult	0.26027	3.74735	0.23891	3.57813	0.19743	3.63596	0.29891	3.35411	0.30736	3.34352	0.35181	3.22813	0.25292	3.35381
1	adult	0.2115	3.68358	0.23621	3.72249	0.19704	3.66434	0.30377	3.53722	0.30837	3.31096	0.40096	3.44323	0.27987	3.46424
1	adult	0.19993	3.89873	0.28119	3.77449	0.20115	3.75797	0.3247	3.56063	0.33091	3.39047	0.37153	3.50031	0.27137	3.38678
1	adult	0.23749	3.66986	0.31335	3.73288	0.23085	3.80769	0.41485	3.41189	0.43208	3.27298	0.5509	3.35614	0.33995	3.34918
1	adult	0.19906	3.44268	0.29426	3.69521	0.19739	3.74628	0.39584	3.32362	0.37489	3.39428	0.39003	3.29123	0.29101	3.34941
1	adult	0.21271	3.75001	0.24689	3.51942	0.1931	3.52266	0.38205	3.10582	0.30754	3.1676	0.34929	3.29155	0.28251	3.4298
1	adult	0.20981	3.66199	0.2418	3.57871	0.20982	3.75196	0.30209	3.28908	0.31862	3.55484	0.36699	3.255	0.25936	3.24412
1	adult	0.20592	3.66648	0.22647	3.74608	0.26294	0.41626	0.32153	0.46349	0.3194	0.40002	3.5036	0.46712	0.36126	0.43192
1	adult	0.20564	3.70436	0.28515	3.72154	0.18045	3.58869	0.35577	3.33651	0.3295	3.39292	0.39118	3.21316	0.26376	3.40017
1	adult	0.21243	3.53366	0.25085	3.81775	0.19676	3.64837	0.30882	3.40634	0.31905	3.38328	0.37888	3.29036	0.26156	3.45644
1	adult	0.22863	3.5367	0.22981	3.86813	0.22127	3.70006	0.27333	3.41905	0.29398	3.36243	0.37945	3.43349	0.29619	3.14226
1	adult	0.27185	3.96757	0.3445	3.80165	0.21199	3.6672	0.43143	3.50422	0.47026	3.40933	0.75735	3.35693	0.39992	3.40942
1	adult	0.22331	3.68038	0.31653	3.65442	0.21173	3.63879	0.48946	3.20717	0.36451	3.32054	0.49995	3.31281	0.31022	3.30147
1	adult	0.20723	3.49565	0.2744	3.64167	0.19683	3.72633	0.31283	3.11231	0.33338	3.29954	0.37333	3.36891	0.28551	3.28658
1	adult	0.22198	3.70106	0.25357	3.62714	0.1949	3.73951	0.31653	3.24392	0.32628	3.38223	0.39361	3.40011	0.29391	3.29323
1	adult	0.19971	3.59948	0.25796	3.78534	0.19443	3.58814	0.29439	3.23348	0.29797	3.32364	0.35987	3.35467	0.28973	3.30531
1	adult	0.20466	3.89489	0.27784	3.61772	0.18556	3.59044	0.3444	3.30736	0.32195	3.28105	0.4018	3.21927	0.27208	3.45388
1	adult	0.20739	3.78953	0.2529	3.71296	0.19285	3.59935	0.31115	3.43593	0.31404	3.38062	0.37454	3.47638	0.27034	3.37637
1	adult	0.21556	3.65105	0.2364	3.69264	0.19054	3.62928	0.2723	3.34212	0.32158	3.48098	0.32398	3.35596	0.27009	3.31549
1	adult	0.2586	3.77122	0.27774	3.64937	0.21663	3.68864	0.37584	3.4157	0.40388	3.59629	0.46289	3.38027	0.36476	3.41769
1	adult	0.40823	3.68986	0.37516	3.65775	1.06429	0.62232	0.54438	3.25827	0.55467	3.23732	0.48502	3.4035	0.29182	3.37484
1	adult	3.53571	0.5259	3.68679	0.56729	3.62517	0.66152	3.14081	0.58555	3.48925	0.48815	3.50883	0.58407	3.26184	0.43809
1	adult	3.61674	0.52274	3.56429	0.51975	3.44281	0.53654	1.76898	0.53086	3.32253	0.46256	3.20802	0.52952	2.85993	0.45246
1	adult	0.20112	3.59801	0.24718	3.62452	0.18661	3.50589	0.33411	3.33756	0.30935	3.20537	0.39997	3.45511	0.26455	3.31332
1	adult	0.2051	3.77089	0.24732	3.6552	0.21901	3.76213	0.33584	3.36613	0.32994	3.33122	0.39307	3.26005	0.27196	3.41257
1	adult	0.21893	3.75966	0.24862	3.80056	0.21456	3.66177	0.27541	3.44327	0.31742	3.46784	0.32968	3.35782	0.2797	3.36038
1	adult	0.46752	0.80833	0.26404	0.43209	0.29609	0.42584	0.50292	2.05816	0.41739	0.40791	0.75036	0.40086	0.26367	3.49867
1	adult	0.26485	3.99273	0.46012	3.60747	0.22511	3.7189	0.56282	3.21004	0.5264	3.35828	0.89143	3.24442	0.36916	3.2604
1	adult	0.44896	3.45058	0.34166	3.54251	0.21263	3.65073	0.53334	3.22934	0.54572	3.30646	0.73917	3.28396	0.30063	3.42605
1	adult	0.19965	3.60502	0.28727	3.66917	0.20158	3.59673	0.39962	3.23059	0.35574	3.2655	0.43395	3.30806	0.28889	3.33068
1	adult	0.63154	2.78023	0.30149	3.54928	0.19633	3.66594	0.4106	3.31897	0.33917	3.27614	0.44936	3.37096	0.15973	3.64357
1	adult	0.32578	3.74925	0.33917	3.72652	0.19378	3.7306	0.38728	3.30014	0.56889	3.23082	0.41089	3.3569	0.29922	3.26979
1	adult	0.20358	3.8068	0.29762	3.78236	0.18135	3.57972	0.39852	3.3309	0.36053	3.2862	0.42539	3.25553	0.27887	3.3737
1	adult	0.20434	3.69659	0.28802	3.59604	0.19771	3.61518	0.36496	3.48281	0.35382	3.36557	0.42752	3.5739	0.27149	3.14944
1	adult	0.2638	3.8377	0.2893	3.85916	0.21817	3.69833	0.39191	3.39086	0.3559	3.37838	0.55575	3.29013	0.28202	3.46115
1	adult	0.31152	3.74519	0.4641	3.74992	0.49049	2.83296	0.6173	3.49146	0.58	3.47018	0.8768	3.20782	0.39122	3.38029
1	adult	0.22796	3.85992	0.34695	3.59229	0.20244	3.56245	0.5147	3.28701	0.39265	3.37435	0.60466	3.32516	0.34339	3.49891
1	adult	0.24212	3.7641	0.36022	3.59535	0.24378	3.48562	0.53991	3.39934	0.38398	3.31693	0.61956	3.25104	0.30712	3.32017
1	adult	0.30104	3.65769	0.36114	3.67439	0.20493	3.48225	0.45696	3.35283	0.50898	3.28528	0.55345	3.16784	0.34222	3.32136
1	adult	0.20835	3.64815	0.38482	3.61833	0.20749	3.60899	0.5225	3.26533	0.43918	3.38434	0.59911	3.27091	0.2913	3.45215
1	adult	0.20161	3.68406	0.32955	3.58979	0.19349	3.46124	0.47245	3.38042	0.35236	3.18583	0.61924	3.25755	0.28752	3.26721
1	adult	0.25367	3.55352	0.23921	3.61842	0.21531	3.62941	0.28511	3.47738	0.33747	3.45513	0.32641	3.39691	0.30549	3.33989
1	adult	0.38155	3.75503	0.36557	3.69089	0.20529	3.78671	0.46312	3.25365	0.39745	3.37258	0.63138	3.32533	0.30917	3.51703
1	adult	0.25348	3.93287	0.4201	3.62881	0.22977	3.72939	0.44927	3.39672	0.42334	3.44048	0.53236	3.36208	0.36598	3.32867
1	adult	0.30853	4.0254	0.36426	3.47521	0.22133	3.66798	0.49805	3.2988	0.38517	3.25807	0.60001	3.14475	0.31726	3.44777
1	adult	0.23247	3.60416	0.25227	3.80646	0.21868	3.67402	0.31409	3.33395	0.31993	3.43744	0.40091	3.22028	0.28788	3.31539
1	adult	0.24006	3.75249	0.22677	3.93132	0.23172	3.5023	0.29456	3.38906	0.29017	3.29933	0.34626	3.41197	0.2783	3.27852
1	adult	0.23459	3.88653	0.24922	3.736	0.20519	3.7437	0.28977	3.44601	0.34496	3.35536	0.44608	3.30813	0.28111	3.50186
1	adult	3.72004	0.57247	3.87651	0.50356	3.72813	0.63761	3.32802	0.49019	3.67609	0.50723	3.50473	0.59474	3.39342	0.46208
1	adult	0.25387	3.65185	0.22225	3.72221	0.20597	3.74826	0.3477	3.44764	0.32228	3.38272	0.4389	3.31298	0.27881	3.34033
1	adult	0.51209	0.61634	0.26376	0.43586	0.27562	0.43559	0.30862	1.76171	0.33522	0.39238	0.80393	0.46838	0.34999	0.4035
1	adult	0.4343	0.65514	3.91537	0.6086	3.43976	0.53049	2.90621	1.42185	0.3896	0.38593	3.30352	0.45254	3.11278	0.45851
1	adult	0.39089	3.58049	0.29514	3.33235	0.22245	3.46825	0.36757	3.2367	0.36549	3.24554	0.48257	3.34954	0.35714	3.30591
1	adult	0.25485	3.67287	0.28457	3.44545	0.22925	3.47999	0.45443	0.49885	0.31728	3.28833	0.36997	3.38165	0.32363	3.1443
1	adult	0.22074	3.61924	0.25679	3.54878	0.19456	3.59288	0.27961	2.98511	0.33484	3.34499	0.44151	3.43222	0.26616	3.29734
1	adult	0.22409	3.68974	0.23212	3.69398	0.19973	3.65042	0.29316	3.29855	0.3032	3.25363	0.45097	3.36047	0.26643	3.36593
1	adult	0.21394	3.6821	0.25286	3.74882	0.20495	3.62755	0.28398	3.15811	0.34187	3.31714	0.42865	3.34879	0.26569	3.41947
1	adult	0.2181	3.67124	0.22773	3.90341	0.19911	3.52441	0.2774	3.40922	0.31669	3.45363	0.38232	3.25031	0.24531	2.88245
1	adult	3.48849	0.57668	3.77048	0.56439	0.32349	0.46009	2.96191	0.74772	3.49501	0.48279	3.45109	0.51232	0.35815	0.44117
1	adult	3.55769	0.58266	0.28409	0.46013	3.03262	0.51608	0.29593	2.71585	0.44445	0.41066	0.74891	0.41262	0.35472	0.38067
1	adult	0.25901	3.59824	0.27332	3.66475	0.24043	3.72842	0.32089	3.19981	0.32096	3.35894	0.39344	3.28286	0.31032	3.16439
1	adult	0.2284	3.62127	0.27735	3.51423	0.18744	3.56567	0.30217	3.0694	0.32524	3.20203	0.46181	3.27466	0.25963	3.2134
1	adult	0.22357	3.63716	0.25275	3.72329	0.20045	3.60932	0.27864	3.13947	0.32247	3.43185	0.41414	3.28933	0.27155	3.48531
1	adult	0.21633	3.7191	0.24286	3.67508	0.18652	3.58837	0.28686	3.24818	0.31605	3.20846	0.41612	3.28055	0.25628	3.16105
1	adult	0.21699	3.69956	0.25232	3.68618	0.19803	3.69124	0.28241	3.12888	0.32323	3.47257	0.39875	3.43499	0.25151	3.24697
1	adult	0.21416	3.84369	0.23277	3.67345	0.20148	3.63865	0.27804	3.25053	0.32162	3.4432	0.38317	3.23798	0.25972	3.19839
1	adult	3.51578	0.5755	3.64618	0.58401	3.08547	0.46175	2.99219	0.52095	2.84115	1.31236	0.72579	0.40718	0.35438	0.38552
1	adult	0.39402	0.72797	2.64505	1.55548	0.3016	0.50549	2.91984	0.57643	0.36187	0.39384	0.7221	0.41863	3.31604	0.47613
1	adult	0.2664	3.45398	0.26289	3.50878	0.21622	3.54298	0.32085	2.1833	0.31962	3.14515	0.42163	3.01795	0.31887	2.90989
1	adult	0.24851	3.92673	0.22731	3.52204	0.20627	3.61094	0.29419	2.80801	0.31597	3.28254	0.36342	3.34755	0.27361	3.39261
1	adult	0.19832	3.56016	0.27329	0.53761	0.28203	0.44116	0.33604	0.46347	0.35578	3.22002	0.74347	0.4113	0.34424	0.41063
1	adult	0.21428	3.64654	0.25085	3.90479	0.19113	3.70568	0.26776	3.06062	0.32308	3.47643	0.37579	3.28909	0.28834	3.43042
1	adult	0.21867	3.71275	0.26306	3.61696	0.20102	3.54056	0.2887	3.11799	0.31758	3.32253	0.34371	3.24926	0.2715	3.5682
1	adult	0.2161	3.71789	0.24246	3.80507	0.19497	3.61484	0.29661	3.40247	0.33324	3.40817	0.3632	3.32784	0.27969	3.43087
1	adult	3.41153	0.56888	3.72099	0.54704	3.25218	0.547	2.91491	0.63377	3.2367	0.76741	3.49168	0.5293	3.2638	0.4824
1	adult	3.25493	0.52779	3.97229	0.58625	3.29846	0.49787	3.13579	0.48595	3.56592	0.51795	3.51958	0.50991	3.35681	0.44352
1	adult	0.24989	3.83368	0.29151	3.71545	0.21322	3.55476	0.41138	3.34615	0.34622	3.28211	0.4961	3.4076	0.31483	3.24241
1	adult	0.42673	2.81539	0.28479	3.44835	0.26444	3.43194	0.44963	0.49527	0.34702	2.92143	0.39946	2.83106	0.33669	2.68789
1	adult	0.23074	3.68252	0.22572	3.57029	0.21429	3.58196	0.29782	2.35419	0.28702	3.27414	0.31986	3.33457	0.26573	3.05213
1	adult	0.23663	3.75015	0.27552	3.70516	0.18115	3.51909	0.2982	3.12489	0.33035	3.38903	0.42155	3.2642	0.25657	3.36612
1	adult	0.21801	3.75658	0.24379	3.76046	0.18436	3.51362	0.27531	3.16072	0.31324	3.43176	0.35524	3.32061	0.26685	3.36552
1	adult	0.21257	3.73919	0.2439	3.60918	0.19332	3.48944	0.28741	3.27566	0.30764	3.26146	0.37254	3.26008	0.2712	3.36809
1	adult	0.42474	0.88676	0.26164	0.42441	3.12141	0.525	0.32083	2.35782	0.42245	0.43108	0.68826	0.38182	0.34093	0.40183
1	adult	0.40705	0.69005	3.65008	0.57338	2.99827	0.50898	3.16654	0.52681	3.59282	0.53266	0.70667	0.43397	0.33233	0.41881
1	adult	0.2818	3.79332	0.25234	3.61378	0.21692	3.54132	0.31831	2.95683	0.30316	3.07239	0.39598	3.17338	0.32218	2.96606
1	adult	0.21114	3.61892	0.23719	3.51466	0.19835	3.56819	0.32858	3.27212	0.32829	3.40822	0.38911	3.20516	0.26431	3.20139
1	adult	0.21501	3.70458	0.25942	3.54606	0.18294	3.57547	0.30652	3.17343	0.3321	3.42778	0.34529	3.23024	0.26122	3.29785
1	adult	0.2177	3.64352	0.2371	3.61514	0.18101	3.53226	0.29209	3.31503	0.35844	3.25124	0.35348	3.11807	0.26395	3.41436
1	adult	0.2066	3.68351	0.23236	3.8048	0.18523	3.72898	0.29247	3.31988	0.31822	3.39694	0.37886	3.34617	0.26379	3.32594
1	adult	0.22545	3.69393	0.23824	3.65765	0.20238	3.64865	0.30405	3.4998	0.32341	3.36059	0.36906	3.32448	0.26646	3.44807
1	adult	3.48946	0.55056	3.69118	0.55358	2.83112	0.53275	3.10194	1.03157	3.73561	0.55325	3.42916	0.47625	3.34771	0.47366
1	adult	0.40551	0.89221	3.84139	0.57226	0.27604	0.44727	0.53932	1.70452	0.39319	0.41035	3.44195	0.52777	3.27664	0.45921
1	adult	0.21782	3.53095	0.28126	3.5052	0.20714	3.7484	0.42792	3.34157	0.37303	3.18823	0.51247	3.34182	0.28867	3.36001
1	adult	0.20831	3.59083	0.24111	3.64157	0.19741	3.65831	0.29205	3.27336	0.28968	3.1808	0.33493	3.22839	0.27359	3.32555
1	adult	0.23135	3.89229	0.26942	3.81772	0.20277	3.61795	0.31228	3.18875	0.3323	3.32148	0.41752	3.36976	0.26541	3.38284
1	adult	0.2075	3.62378	0.2375	3.42471	0.19395	3.56201	0.31688	3.32313	0.31535	3.2202	0.36863	3.44686	0.2641	3.17017
1	adult	0.2041	3.65017	0.2574	3.60682	0.18834	3.7209	0.31323	3.40095	0.33388	3.37522	0.39803	3.44531	0.27087	3.38254
1	adult	3.1679	0.51945	3.98684	0.62633	3.33217	0.54558	2.90744	0.5138	3.44309	0.50264	3.27989	0.53751	3.24685	0.48501
1	adult	0.384	0.62423	0.26979	0.44869	0.27668	0.39687	0.26038	3.34148	0.33209	0.41641	0.26986	3.39637	0.26239	3.26039
1	adult	3.42428	0.55741	0.26949	0.42341	0.29205	0.41426	3.14012	0.61567	3.68614	0.53356	3.5751	0.50976	3.26292	0.45164
1	adult	0.25916	3.56808	0.24383	3.63213	0.21312	3.48743	0.32928	3.32855	0.33874	3.23618	0.36291	3.36322	0.3163	3.27453
1	adult	0.23617	3.73712	0.24342	3.66575	0.22397	3.75694	0.30302	2.09576	0.29146	3.26507	0.34724	3.6553	0.28928	3.32845
1	adult	0.19963	3.5795	0.24904	3.51406	0.18829	3.56753	0.31023	3.11525	0.43061	3.32319	0.37031	3.44808	0.27413	3.40693
1	adult	0.21834	3.43731	0.25652	3.54765	0.18894	3.54175	0.29315	3.16445	0.32533	3.30874	0.37624	3.31527	0.26555	3.33055
1	adult	0.19476	3.63769	0.25217	3.69522	0.18691	3.63875	0.31422	3.22555	0.3198	3.48107	0.41209	3.3882	0.26763	3.45767
1	adult	2.83169	0.5126	3.75863	0.57878	2.98674	0.48637	2.85975	0.48589	3.52802	0.51381	0.67556	0.38262	3.04281	0.48932
1	adult	0.41885	0.98056	0.26571	0.43933	0.29168	0.46376	0.30096	2.30694	0.35481	0.4379	0.71537	0.37537	0.34055	0.38275
1	adult	3.45358	0.5157	3.85831	0.59822	3.60723	0.51561	2.9919	1.13654	3.64798	0.48367	3.42246	0.48901	3.38976	0.47696
1	adult	0.23837	3.75474	0.38986	3.68483	0.3052	3.6842	0.5767	3.18738	0.41688	3.31023	0.64342	3.166	0.31278	3.30098
1	adult	0.22076	3.74911	0.28534	3.83569	0.19665	3.53328	0.34208	3.23525	0.33474	3.2038	0.38015	3.26117	0.26874	3.34641
1	adult	0.22765	3.81935	0.27788	3.71505	0.19076	3.56261	0.30924	3.26328	0.33075	3.33163	0.37956	3.17736	0.26725	3.34286
1	adult	0.23835	3.60161	0.2588	3.64294	0.21173	3.71444	0.30086	3.18791	0.32005	3.3398	0.35805	3.37903	0.26967	3.31629
1	adult	0.21456	3.78953	0.24102	3.71979	0.18536	3.5255	0.31317	3.1869	0.32017	3.45305	0.42505	3.32549	0.28234	3.31108
1	adult	0.3804	0.87405	0.27259	0.44208	0.28039	0.39733	0.30968	1.22936	0.39325	0.37631	3.30539	0.4874	2.42763	0.99971
1	adult	0.37912	0.8538	0.28811	0.42965	0.27247	0.38788	0.36003	1.79622	0.34711	0.40638	0.5682	0.45688	0.34782	0.40666
1	adult	0.49028	0.57234	0.73762	2.65862	0.29565	0.43166	1.42827	0.49221	0.39145	0.40982	3.33851	0.50069	0.35052	0.38837
1	adult	0.35245	3.26647	0.40933	3.43824	0.20484	3.55188	0.56552	3.22634	0.37726	3.17404	0.56644	3.31553	0.40693	3.37665
1	adult	0.22227	3.62579	0.23917	3.63312	0.20024	3.37519	0.30475	3.17322	0.31056	3.30495	0.32152	3.34986	0.2915	3.27789
1	adult	0.23891	3.60828	0.28723	3.51731	0.20882	3.63199	0.30001	3.08267	0.32477	3.32336	0.51891	3.04722	0.28028	3.3363
1	adult	0.21481	3.71427	0.25701	3.66709	0.19057	3.64901	0.32785	3.20216	0.3242	3.43285	0.39275	3.28713	0.26719	3.38619
1	adult	0.20254	3.85689	0.25819	3.66821	0.1986	3.62848	0.39671	3.41807	0.34044	3.29221	0.39944	3.53024	0.26012	3.3629
1	adult	3.61757	0.58723	3.68632	0.60545	3.7495	0.62433	3.17775	0.57145	3.5477	0.49793	3.5598	0.51374	3.36981	0.47412
1	adult	0.31305	0.50437	0.28218	0.46351	2.57148	0.49149	0.32701	0.40251	3.57923	0.49541	3.24164	0.45382	3.25666	0.5066
1	adult	3.63862	0.63215	3.90163	0.60664	0.29998	0.48829	2.35853	2.03678	3.54908	0.47688	3.38544	0.45677	3.2237	0.45797
1	adult	0.24378	3.66213	0.28994	3.5636	0.2201	3.63017	0.46709	3.24625	0.36127	3.2576	0.49799	3.35413	0.34533	3.55761
1	adult	0.21643	3.77075	0.28016	3.73483	0.21395	3.64869	0.38114	3.32988	0.34424	3.41238	0.42323	3.30961	0.30005	3.34607
1	adult	0.2152	3.6711	0.27914	3.70072	0.21829	3.45537	0.42303	3.36659	0.3472	3.32404	0.44111	3.48809	0.27704	3.42708
1	adult	0.20492	3.67305	0.28922	3.67568	0.19956	3.64913	0.40958	3.31695	0.34834	3.38784	0.45024	3.30094	0.26866	3.4111
1	adult	0.19611	3.81292	0.28415	3.71254	0.18614	3.63292	0.37743	3.4039	0.34862	3.47911	0.44102	3.2296	0.27749	3.28752
1	adult	3.48324	0.60559	3.72738	0.58731	0.28374	0.43633	3.20525	0.63063	3.67246	0.54404	3.44635	0.50078	3.31671	0.46809
1	adult	0.39317	0.64294	3.67233	0.57043	0.28874	0.41891	3.28822	0.52174	0.9653	0.41254	3.57671	0.52784	2.82951	0.43843
1	adult	3.5613	0.59186	3.83702	0.55234	3.51883	0.5453	2.97857	0.57751	3.7503	0.5257	3.49333	0.51912	3.32039	0.48418
1	adult	0.82788	3.27291	0.30888	3.89565	0.23455	3.77918	0.45538	3.16258	0.45404	3.23522	0.52028	3.28662	0.33081	3.37189
1	adult	0.24842	3.64491	0.32148	3.52937	0.20429	3.54222	0.40897	3.27745	0.34003	3.17891	0.45866	3.22123	0.29988	3.34616
1	adult	0.2776	3.68467	0.30835	3.55666	0.19891	3.6968	0.39023	3.35966	0.36095	3.39882	0.43427	3.15046	0.35973	3.26692
1	adult	0.21314	3.84389	0.34828	3.68504	0.24227	3.44294	0.47754	3.36224	0.36008	3.2484	0.53833	3.26743	0.28885	3.39238
1	adult	0.2067	3.68045	0.31871	3.64778	0.193	3.71318	0.47905	3.50952	0.37298	3.33521	0.61625	3.17281	0.28536	3.42916
1	adult	3.42764	0.49825	3.82302	0.56351	3.43625	0.55644	3.15778	0.63571	3.54293	0.4821	3.4804	0.53838	3.37293	0.49423
1	adult	3.46882	0.49863	0.20135	3.23946	0.29012	0.43686	2.92307	0.77988	3.423	0.49234	3.41623	0.49577	3.09385	0.46031
1	adult	3.41494	0.55797	3.77041	0.66622	3.2762	0.64291	3.31026	0.87109	3.62739	0.56008	3.28862	0.50399	3.35024	0.51943
1	adult	0.60387	0.51843	0.36996	0.48356	0.3042	0.44116	3.16567	0.68893	0.59413	0.46546	3.3138	0.53745	0.37024	0.50641
1	adult	3.54078	0.56573	3.87508	0.57984	3.57983	0.54002	3.07491	0.51494	3.41284	0.47933	3.30056	0.6669	3.30799	0.46807
1	adult	3.23296	0.63248	3.82818	0.53651	2.7809	0.51788	2.50349	0.54352	3.39381	0.57138	3.48584	0.51438	3.02653	0.49227
1	adult	3.62822	0.54065	3.92159	0.57373	3.5463	0.51879	2.35647	0.52886	3.45006	0.50673	3.30722	0.55065	3.30324	0.48823
1	adult	3.65981	0.55885	3.85824	0.57085	3.61233	0.56257	3.19862	0.5473	3.45777	0.49309	3.41119	0.52656	3.33078	0.50829
1	adult	3.68678	0.57011	3.76912	0.52875	3.48082	0.52922	3.41377	0.50977	3.60501	0.51858	3.65101	0.56432	3.28984	0.44598
1	adult	3.66563	0.55825	3.82536	0.528	3.63781	0.52755	3.1576	0.49412	3.47808	0.49856	3.26672	0.51292	3.25667	0.4776
1	adult	3.7145	0.50558	3.73121	0.50831	3.71057	0.47724	2.91453	0.48774	3.47612	0.49901	3.38555	0.47823	3.08893	0.46422
1	adult	3.45767	0.4626	3.72992	0.67499	3.11585	0.6254	3.33078	0.59658	3.51417	0.48994	2.00157	2.08208	3.34436	0.48495
1	adult	3.38682	0.52692	3.83266	0.60324	3.36661	0.47726	0.34035	0.49971	3.42496	0.46692	3.23222	0.49495	0.34025	0.4165
1	adult	3.6967	0.60028	3.66372	0.53769	3.43469	0.57098	2.41784	0.52223	3.57125	0.51186	3.48454	0.52272	3.38607	0.45362
1	adult	3.52757	0.50248	3.6202	0.5552	3.51529	0.51239	1.8188	0.49729	3.50716	0.5392	3.35605	0.47964	3.29188	0.45401
1	adult	3.33498	0.51055	3.32987	0.5307	3.02024	0.4844	0.43222	0.44283	3.09908	0.48828	2.88338	0.49592	2.5153	0.44936
1	adult	3.61435	0.54116	3.87981	0.57153	3.71761	0.576	2.91991	0.58776	3.50528	0.49629	3.35236	0.51022	3.13209	0.46016
1	adult	3.36959	0.47602	3.56904	0.50924	3.46011	0.46946	2.43501	0.48214	3.36514	0.47957	3.14843	0.46433	2.93746	0.48758
1	adult	1.82884	2.53245	2.34692	2.1097	3.70731	0.5208	3.31102	0.51229	2.39679	1.8403	2.00909	2.15566	3.16044	0.45616
1	adult	2.29567	0.54272	0.52496	0.8065	3.20482	0.63656	3.15879	0.60365	3.48012	0.53161	0.65283	0.47355	3.26418	0.6015
1	adult	3.58314	0.61357	3.74764	0.61489	3.55774	0.64558	2.79415	0.52994	3.51076	0.49769	3.49301	0.56597	3.36102	0.45993
1	adult	3.70653	0.54544	3.67415	0.56289	3.67982	0.51862	1.81474	0.48492	3.46047	0.47993	3.37822	0.51717	3.40346	0.49125
1	adult	3.68683	0.59557	3.63854	0.56645	3.4647	0.63407	2.71524	0.54422	3.45532	0.49643	3.35735	0.55478	3.39181	0.50481
1	adult	3.69052	0.51118	3.69204	0.52725	3.64211	0.55941	2.3521	0.49145	3.45934	0.47561	3.53815	0.54038	3.27913	0.47236
1	adult	3.46229	0.54662	3.62464	0.57504	3.30282	0.6137	1.43879	0.53342	3.31153	0.50055	3.17357	0.58238	2.7604	0.5087
1	adult	2.68422	0.73727	3.44163	0.69957	1.64087	2.07395	2.34652	0.66094	3.18178	0.56672	3.36104	0.47458	1.6033	1.61112
1	adult	2.66406	0.62766	2.66947	1.15755	3.2514	0.44906	2.33888	0.47969	2.95518	0.47037	2.65391	0.50206	2.70599	0.41577
1	adult	1.70267	2.12888	0.30198	0.56585	0.27381	0.42677	3.00099	0.6345	3.45829	0.53846	0.77083	0.42562	3.35024	0.54229
1	adult	3.28561	0.55477	3.79752	0.6367	3.5231	0.5566	1.04809	1.86726	3.46307	0.49009	3.41028	0.50175	3.13804	0.47323
1	adult	3.40413	0.45808	3.58784	0.51443	3.47412	0.53743	1.95355	0.50455	3.31907	0.46284	3.36238	0.50605	3.14498	0.46647
1	adult	3.58098	0.52203	3.71269	0.57364	3.37416	0.50717	1.27268	0.49477	3.36835	0.51391	3.26699	0.52898	2.97204	0.4738
1	adult	3.85742	0.57816	3.70665	0.57568	3.48963	0.57857	2.6569	0.49384	3.62134	0.49837	3.48158	0.55003	3.30463	0.46394
1	adult	3.38351	0.50625	3.79882	0.55227	3.54327	0.55445	2.73931	0.53851	3.47134	0.50054	3.35341	0.50502	3.19604	0.48073
1	adult	3.79636	0.5643	4.06791	0.56952	3.66849	0.55078	3.43618	0.55198	3.50438	0.5372	3.54372	0.51645	3.35993	0.46007
1	adult	3.82839	0.54472	3.90157	0.57519	3.65161	0.54559	3.30136	0.51263	3.53275	0.51715	3.43231	0.54631	3.36783	0.49451
1	adult	0.23466	3.47451	0.28298	0.46806	2.56776	1.07382	0.59759	3.19996	0.34904	0.42921	3.38292	0.54209	0.35514	0.41835
1	adult	3.25626	0.58363	3.55414	0.60076	3.48345	0.57782	2.72342	0.52622	3.37531	0.52539	3.3537	0.54759	3.13334	0.43635
1	adult	3.29963	0.71264	3.62885	0.59471	3.39093	0.57505	2.29576	0.61226	3.31284	0.51299	3.3885	0.50428	2.95109	0.49633
1	adult	3.63565	0.60676	3.80667	0.60045	3.65215	0.63304	2.99741	0.56365	3.53519	0.53568	2.94398	0.53518	3.36526	0.47281
1	adult	3.51021	0.54424	3.5617	0.55023	3.58812	0.54883	2.8027	0.52654	3.36439	0.4766	3.35236	0.51393	3.27315	0.47641
1	adult	2.31239	1.59385	2.85506	1.79743	2.4102	1.69833	1.30501	1.55656	2.75519	1.26888	2.12753	2.07311	2.02759	1.43692
1	adult	3.7828	0.53376	3.90018	0.67744	3.55053	0.59105	3.23686	0.52773	3.6582	0.52411	3.65962	0.53437	3.18317	0.55964
1	adult	3.82118	0.56322	3.70777	0.53104	3.66672	0.65226	3.43561	0.4931	3.57053	0.49987	3.74798	0.56242	3.35331	0.51775
1	adult	3.53424	0.64018	3.81627	0.59392	3.32745	0.64657	3.18105	0.60246	3.46287	0.52103	3.38353	0.57355	3.36471	0.49155
1	adult	3.61916	0.54291	3.67402	0.57967	3.09388	0.53679	2.27841	0.99606	3.39661	0.49662	3.37841	0.52271	3.21539	0.49283
1	adult	3.44541	0.51261	3.69958	0.58921	3.35936	0.5785	2.86054	0.51065	3.55081	0.533	3.43049	0.4846	3.3357	0.47066
1	adult	3.52033	0.54727	3.39145	0.52949	3.37599	0.58987	2.86032	0.52716	3.47552	0.48735	3.48486	0.57223	3.27031	0.49233
1	adult	3.55251	0.54136	3.60061	0.50288	3.487	0.56556	2.93394	0.55129	3.58353	0.5284	3.34092	0.5265	3.2061	0.49345
1	adult	0.43158	0.40673	3.311	0.62282	2.95214	0.43328	0.41067	0.40342	3.42473	0.5098	3.42294	0.43484	2.0513	0.39398
1	adult	3.64061	0.56477	3.72868	0.55479	3.85141	0.51872	3.37165	0.55602	3.53228	0.51788	3.51095	0.54429	3.51056	0.47183
1	adult	3.77046	0.49784	3.68499	0.53678	3.65514	0.52094	3.28179	0.53052	3.4451	0.5208	3.49642	0.54458	3.41752	0.48892
1	adult	3.19198	0.67415	3.69284	0.62028	0.52372	0.46362	3.16097	0.56651	3.53815	0.52707	3.40898	0.49749	3.16933	0.44203
1	adult	3.47252	0.49795	3.69879	0.55823	3.49742	0.53941	2.01218	0.54768	3.23397	0.48647	3.21079	0.47849	3.09066	0.44505
1	adult	3.57842	0.53202	3.61191	0.5646	3.44592	0.50997	1.96914	0.52682	3.37745	0.48399	3.32143	0.52431	3.06601	0.46867
1	adult	3.6642	0.55768	3.74314	0.53977	3.49461	0.51966	2.47818	0.48899	3.53105	0.49222	3.41039	0.50479	3.20919	0.47961
1	adult	3.60937	0.53082	3.70003	0.55509	3.61838	0.59613	2.98049	0.53006	3.56722	0.50465	3.23631	0.52796	3.38071	0.48985
1	adult	2.44241	1.6485	2.70765	1.79547	2.31306	1.76089	1.77039	2.0289	2.59652	1.37808	2.20829	1.90532	2.05844	1.46077
1	adult	1.76621	1.55483	2.6192	1.42359	1.90068	1.31374	2.51346	0.46965	2.96704	0.73817	2.10425	1.28615	1.75128	1.06721
1	adult	3.73386	0.57474	3.75489	0.53313	3.77662	0.6091	3.25342	0.52383	3.61049	0.49318	3.53863	0.53209	3.33745	0.51109
1	adult	3.08454	0.5687	3.50787	0.58846	2.8875	0.60549	3.07416	0.7253	3.27258	0.79464	3.26001	0.51532	0.38908	0.44481
1	adult	3.57249	0.48649	3.74356	0.57483	3.6062	0.64213	2.96755	0.61664	3.51234	0.51933	3.41551	0.55178	3.25871	0.49801
1	adult	3.60594	0.54363	3.67095	0.53347	3.42361	0.58043	2.41418	0.58166	3.45985	0.54641	3.25961	0.571	3.08377	0.46683
1	adult	3.77196	0.60901	3.68089	0.57357	3.49443	0.58567	2.88313	0.58851	3.56726	0.51853	3.37513	0.51803	3.3117	0.49469
1	adult	3.66454	0.47085	3.77875	0.56356	3.54489	0.49169	2.06301	0.46671	3.52837	0.49867	3.29728	0.49189	3.02124	0.44789
1	adult	2.86328	1.293	2.4349	2.04384	2.82481	1.06529	1.63281	2.12169	3.02443	0.79474	2.12455	1.90263	2.27328	1.18587
1	adult	2.56726	1.68253	2.69392	1.8987	2.23083	1.79547	1.87779	2.36565	2.52991	1.55207	2.23105	1.77794	2.21594	1.46471
1	adult	3.79144	0.51374	3.94918	0.56568	3.76	0.53443	3.24417	0.4963	3.60671	0.5318	3.49232	0.51757	3.27829	0.47301
1	adult	3.41315	0.55852	3.45142	1.11745	3.23211	0.66097	3.45461	0.60563	3.58549	0.54957	3.35138	0.53057	3.27327	0.47488
1	adult	3.57798	0.52335	3.69483	0.59166	3.41567	0.51392	2.51505	0.51549	3.32964	0.49457	3.33026	0.48819	3.05556	0.46111
1	adult	3.59902	0.59016	3.66634	0.60122	3.48986	0.64362	3.1089	0.60148	3.52817	0.48954	3.58101	0.58552	3.31608	0.47885
1	adult	3.73763	0.52833	3.72963	0.57811	3.48877	0.55567	2.8006	0.53394	3.54758	0.47985	3.53447	0.53255	3.19871	0.48132
1	adult	3.53309	0.56939	3.7711	0.58153	3.66761	0.59803	3.13398	0.58793	3.56989	0.49645	3.38749	0.53984	3.3575	0.45911
1	adult	3.66438	0.55071	3.71619	0.56395	3.56613	0.61311	3.31705	0.56251	3.45556	0.51699	3.47389	0.516	3.38398	0.49272
1	adult	3.38148	0.51023	3.50305	0.64544	3.50328	0.51546	3.07266	0.53382	3.38089	0.48702	3.49864	0.51175	3.14355	0.46863
1	adult	3.77493	0.53675	4.01884	0.5663	3.69971	0.50248	3.20088	0.52096	3.46347	0.49336	3.53719	0.45396	3.2204	0.47484
1	adult	0.23485	3.53699	0.44921	0.67737	0.81627	0.58581	0.27763	2.7546	0.43874	3.1775	0.42338	3.21498	0.29654	3.3036
1	adult	3.63833	0.55536	3.77553	0.60456	3.53901	0.61171	3.17449	0.57884	3.49963	0.49434	3.4389	0.5575	3.38147	0.47228
1	adult	3.5657	0.52531	3.4812	0.55497	3.36475	0.50922	2.41555	0.52794	3.35292	0.50455	3.29468	0.52197	3.00514	0.44684
1	adult	3.6897	0.50554	3.64822	0.54147	3.43319	0.49134	2.5593	0.47459	3.40317	0.50139	3.4531	0.5145	3.15344	0.44312
1	adult	3.60329	0.51776	3.82111	0.56818	3.65482	0.56902	3.17953	0.59301	3.5532	0.49993	3.44652	0.53419	3.35189	0.46796
1	adult	3.55075	0.49444	3.81864	0.54263	3.45145	0.44395	2.37204	0.49458	3.23914	0.48085	3.04161	0.44493	2.90417	0.45629
1	adult	2.7858	1.62804	2.91682	1.96045	2.52903	1.76461	2.08639	2.28591	2.71709	1.52778	2.51653	2.16569	2.34077	1.67842
1	adult	3.76557	0.46116	3.82565	0.53927	3.65499	0.51708	3.18689	0.52653	3.613	0.49598	3.53805	0.51214	3.19885	0.47049
1	adult	0.38614	0.57207	0.70013	0.98417	0.19256	3.48967	0.42262	3.02003	0.35821	0.56779	1.15348	0.46908	0.36592	0.41731
1	adult	3.47014	0.56265	3.93	0.7263	3.35061	0.65036	3.14177	0.58811	3.59461	0.50353	3.46553	0.53873	3.19349	0.47053
1	adult	3.5133	0.51824	3.71043	0.59043	3.34731	0.51136	3.03134	0.51021	3.36206	0.4981	3.34237	0.49848	3.0417	0.4775
1	adult	3.13655	0.44129	3.71953	0.5473	3.39345	0.49675	2.77363	0.48941	3.3735	0.5024	3.30157	0.47783	2.98696	0.44699
1	adult	3.75297	0.50513	3.63761	0.53817	3.57187	0.57052	3.17821	0.50723	3.42429	0.50173	3.4536	0.53464	3.34513	0.45517
1	adult	2.99574	0.41694	3.07455	0.42936	2.68773	0.40201	1.5085	0.43768	3.06096	0.47584	2.31439	0.44723	2.25223	0.44502
1	adult	3.69975	0.52008	3.94205	0.58033	3.72342	0.62828	3.46219	0.54418	3.38942	0.52947	3.51398	0.57258	3.30044	0.47414
1	adult	3.83001	0.60362	3.87985	0.58548	3.647	0.57665	3.29384	0.5079	3.6451	0.50048	3.59429	0.62032	3.522	0.48388
1	adult	0.43983	0.69161	0.34278	0.51093	0.29546	0.42935	0.39589	1.12214	0.37941	0.40881	0.42774	3.05311	0.65395	1.3919
1	adult	3.66011	0.52309	3.78078	0.6551	3.56586	0.70744	3.23853	0.66497	3.56956	0.5435	3.41034	0.58754	3.29847	0.48554
1	adult	3.63515	0.5904	3.69845	0.58506	3.51673	0.73588	3.31446	0.60163	3.4609	0.54676	3.38227	0.60063	3.18593	0.49313
1	adult	3.38942	0.43914	3.61447	0.60386	3.40986	0.46194	2.40288	0.54496	3.31765	0.48412	3.15063	0.55154	2.95877	0.56621
1	adult	1.2188	1.75649	1.82103	2.00928	1.18289	1.69992	0.89068	1.77835	2.41132	1.02124	1.04064	1.41705	1.49264	1.14736
1	adult	3.76151	0.51165	3.83619	0.56462	3.68468	0.55606	3.43973	0.52155	3.46516	0.4968	3.40186	0.57051	3.33615	0.4611
1	adult	3.53573	0.46822	3.65379	0.49863	3.37685	0.42264	2.43351	0.44013	3.42121	0.47791	3.17736	0.44939	2.91774	0.45473
1	adult	3.895	0.61493	3.79405	0.60309	3.64927	0.70672	3.47488	0.62605	3.6083	0.56255	3.47868	0.71327	3.46371	0.50903
1	adult	2.77229	1.91289	2.86166	1.61166	2.58629	1.76485	2.16623	2.49983	2.73508	1.52727	2.4598	2.02538	2.33877	1.50806
1	adult	3.80461	0.61693	3.93484	0.6335	3.76064	0.64131	3.30732	0.56413	3.56887	0.50128	3.53687	0.60221	3.28578	0.47171
1	adult	3.72638	0.68117	3.8746	0.55779	3.56481	0.65264	3.34532	0.65122	3.59851	0.51408	3.40433	0.61722	3.35455	0.49247
1	adult	2.32151	2.05051	2.51506	2.11235	1.93451	2.12625	1.82622	2.46677	2.57196	1.65302	1.95013	2.14497	3.269	0.46884
1	adult	3.68065	0.59814	3.91714	0.55446	3.66466	0.55392	3.48806	0.52674	3.46678	0.48481	3.55189	0.57638	3.49986	0.50517
1	adult	3.78281	0.64874	3.81585	0.53994	3.54418	0.56643	3.32707	0.47417	3.55531	0.50522	3.61806	0.57917	3.35867	0.47138
1	adult	3.72782	0.5598	3.92516	0.59895	3.88906	0.56429	3.26437	0.59935	3.58696	0.52779	3.63623	0.55284	3.39734	0.49114
1	adult	3.72751	0.58406	3.81261	0.51606	3.51941	0.44345	2.75943	0.47547	3.55397	0.47127	3.31827	0.48152	3.02744	0.44554
1	adult	2.72795	1.6856	2.77848	1.94757	2.18157	2.04088	1.88827	1.1374	2.62736	1.43944	2.48096	1.50821	2.41398	1.26458
1	adult	3.67189	0.53844	3.72373	0.606	3.46635	0.62116	2.71319	0.57637	3.37733	0.4941	3.4416	0.61377	3.26124	0.46695
1	adult	3.48701	0.48011	3.64635	0.51268	3.45122	0.46692	0.46763	0.47617	3.43173	0.49194	3.06777	0.45533	2.94804	0.45806
1	adult	3.54035	0.52946	3.68535	0.52748	3.52026	0.49068	1.304	0.52075	3.46547	0.47792	3.4471	0.51178	3.12093	0.49942
1	adult	3.8617	0.52935	3.71707	0.51458	3.52838	0.52237	2.89899	0.54946	3.50286	0.48316	3.50247	0.56479	3.42302	0.50997
1	adult	3.64351	0.58615	3.69449	0.55982	3.46487	0.49502	2.82449	0.54621	3.43938	0.45443	3.29915	0.47545	3.09465	0.49619
1	adult	1.19348	3.02587	3.76697	0.569	1.76385	2.09527	3.17836	0.49951	3.64505	0.52801	3.27331	0.45925	1.73631	1.93214
1	adult	3.80177	0.74697	4.00724	0.67221	3.75191	0.75332	3.5453	0.59706	3.70642	0.57767	3.58026	0.69856	3.64224	0.52437
1	adult	3.72879	0.58876	3.73744	0.58335	3.47011	0.66753	2.6835	0.53915	3.60262	0.50272	3.35095	0.54577	3.35165	0.50325
1	adult	3.49938	0.56603	3.68098	0.52794	3.43645	0.64342	2.34152	0.49786	3.58095	0.53453	3.38214	0.57218	3.30387	0.46983
1	adult	3.46023	0.53866	3.66562	0.55411	3.47921	0.62171	2.24485	0.54991	3.51544	0.50105	3.50432	0.57761	3.26339	0.51067
1	adult	3.56427	0.5977	3.7711	0.57596	3.60476	0.6234	2.92568	0.54947	3.60001	0.51577	3.47824	0.51725	3.33977	0.47587
1	adult	3.48398	0.58195	3.55493	0.50542	3.42773	0.51202	2.07999	0.49059	3.44028	0.46688	3.34558	0.51389	3.09738	0.47802
1	adult	3.61896	0.61399	3.68288	0.57358	3.45734	0.53285	2.96269	0.49193	3.60613	0.4929	3.42807	0.51059	3.35407	0.48121
1	adult	3.66698	0.5889	3.81814	0.58077	3.73738	0.58118	3.36654	0.56463	3.58847	0.52461	3.39599	0.56289	3.38394	0.47417
1	adult	3.84678	0.59061	3.85787	0.57719	3.60015	0.58104	3.19953	0.56421	3.53873	0.49567	3.51114	0.61275	3.31802	0.50761
1	adult	2.18688	2.00534	2.80469	1.73722	2.53171	1.76776	1.06595	1.8166	2.4751	1.38548	2.14285	1.91267	2.02951	1.59393
1	adult	3.60585	0.60589	3.7359	0.59793	3.55363	0.67679	2.95665	0.58902	3.59554	0.50093	3.49613	0.54257	3.4355	0.64055
1	adult	2.13749	2.25009	3.81541	0.63017	3.53338	0.61278	1.42656	1.79469	2.49643	1.82171	3.4229	0.55905	3.38598	0.45942
1	adult	3.58141	0.4732	3.77193	0.53741	3.60087	0.64578	2.66824	0.48135	3.64841	0.50101	3.36178	0.54346	3.3231	0.48536
1	adult	3.42152	0.55564	3.47947	0.54023	3.34418	0.51251	1.11064	0.4749	3.50741	0.49151	3.20407	0.46849	2.97204	0.44547
1	adult	2.23881	1.96786	3.71254	0.55255	1.74147	2.1056	1.45376	1.32953	1.22529	2.81137	3.29006	0.47623	1.84793	1.38993
1	adult	3.76375	0.55654	3.91473	0.61364	3.68939	0.56286	3.13398	0.91043	2.2715	1.8002	3.39026	0.52226	3.45468	0.48203
1	adult	3.73461	0.57376	3.85783	0.58994	3.66827	0.64254	3.39183	0.5938	3.65484	0.53342	3.55668	0.71643	3.39394	0.52297
1	adult	3.67882	0.55855	3.82274	0.63303	3.54211	0.74532	3.11109	0.56595	3.22807	0.48548	3.45877	0.56167	3.39552	0.47283
1	adult	3.60899	0.54319	3.5222	0.58709	3.62557	0.62228	2.73385	0.59519	3.46305	0.52615	3.28818	0.53331	3.27964	0.47355
1	adult	3.6257	0.5619	3.73519	0.57151	2.2098	2.0353	2.76203	0.59536	2.38319	1.80332	3.3191	0.50324	2.27327	1.63099
1	adult	3.23449	0.4858	3.27983	0.49969	3.17581	0.4191	0.45558	0.49407	3.11862	0.45923	2.9103	0.40748	2.68139	0.43897
1	adult	3.5356	0.57515	3.77788	0.55278	3.48519	0.54254	2.8513	0.53202	3.43484	0.50001	3.44819	0.48447	3.45526	0.49989
1	adult	3.6898	0.53643	3.78067	0.55292	3.66751	0.54596	2.77483	0.57769	3.55307	0.47509	3.58105	0.54621	3.27391	0.48456
1	adult	2.38974	0.41925	2.54926	0.50294	0.42043	0.51619	0.59572	0.46355	2.61598	0.44868	1.6054	0.47593	1.85679	0.4539
1	adult	3.76038	0.5139	3.75687	0.53952	3.68937	0.52533	1.38016	0.42726	3.38142	0.53244	3.52706	0.5844	3.12751	0.47787
1	adult	3.65192	0.52131	3.74813	0.53201	3.53508	0.63539	3.21143	0.56261	3.42894	0.44809	3.54931	0.57851	3.38866	0.47077
1	adult	3.52075	0.55251	3.60832	0.54308	3.54789	0.62314	2.80187	0.56589	3.43579	0.48284	3.33723	0.56282	3.24383	0.4751
1	adult	3.45042	0.55052	3.63377	0.57235	3.33717	0.49653	1.42852	0.49497	2.19125	1.66371	3.09588	0.47246	2.93403	0.43706
1	adult	3.70722	0.59106	3.65814	0.55756	3.52163	0.59662	3.02765	0.61379	3.6463	0.54224	3.41769	0.51125	3.45817	0.50295
1	adult	3.7178	0.63491	3.7386	0.64601	3.47684	0.56942	2.89956	0.51739	3.50114	0.51334	3.3718	0.51781	3.29625	0.50345
1	adult	1.36819	2.61902	0.23478	3.80077	1.28421	2.80815	0.89194	1.39	1.81622	1.95424	0.33243	3.41975	0.314	3.13616
1	adult	3.80388	0.57831	3.78306	0.55862	3.65557	0.65164	3.46938	0.59165	3.71801	0.53334	3.6614	0.56706	3.55023	0.49166
1	adult	3.75378	0.47663	3.86158	0.71472	3.61008	0.77076	3.48617	0.72479	3.78622	0.57168	3.6135	0.70621	3.4483	0.50974
1	adult	3.51452	0.53787	3.64557	0.56157	3.48316	0.63424	3.17389	0.58642	3.36188	0.51107	3.36829	0.54033	3.26473	0.46236
1	adult	3.61173	0.54555	3.77487	0.54808	3.40255	0.5269	2.07204	0.53197	3.3422	0.47589	3.29054	0.50973	3.26853	0.51021
1	adult	3.54764	0.57457	3.82473	0.57229	1.93332	2.16868	2.76617	0.49173	2.93446	1.19401	3.46759	0.54785	1.88258	1.76909
1	adult	3.65807	0.55612	3.68626	0.58876	3.65518	0.59329	2.91442	0.57965	3.50801	0.51736	3.43738	0.51555	3.34423	0.45364
1	adult	3.57636	0.6226	3.77896	0.58331	3.55523	0.54039	2.99593	0.52816	3.55682	0.50531	3.59578	0.52443	3.28046	0.46331
1	adult	2.278	1.77089	1.8628	2.22332	2.08828	1.82314	1.47149	1.73249	2.12724	1.6955	1.86206	1.85275	3.006	0.48466
1	adult	3.74195	0.60604	3.73883	0.53389	3.77669	0.64608	3.38751	0.62787	3.70641	0.53902	3.62102	0.55292	3.44195	0.47127
1	adult	0.2757	3.71745	0.35775	3.66209	0.23338	3.69008	0.45465	3.45862	0.43772	3.44793	0.657	3.3011	0.35436	3.39756
1	adult	3.5433	0.5446	3.7095	0.59842	3.62958	0.70232	3.2948	0.60195	3.53057	0.50395	3.46391	0.56387	3.35861	0.49109
1	adult	3.62731	0.52952	3.64407	0.5615	3.46726	0.57461	2.60623	0.52507	3.49868	0.49547	3.24904	0.5292	3.34529	0.50074
1	adult	3.66277	0.60987	3.8476	0.5998	3.51903	0.62641	2.95729	0.5876	3.30912	0.46377	3.35177	0.51495	3.3128	0.45455
1	adult	3.56752	0.52201	3.55411	0.51174	3.47588	0.49822	1.84721	0.46329	3.22699	0.51505	3.11245	0.47369	2.97277	0.46963
1	adult	3.25434	0.6803	3.56436	0.5374	3.22935	0.45521	0.97244	0.42412	3.31021	0.4564	3.20351	0.46088	1.14335	1.82134
1	adult	3.73628	0.55345	3.83477	0.51987	3.76169	0.56079	2.86082	0.743	3.74437	0.53765	3.64226	0.55642	3.23284	0.49493
1	adult	3.65668	0.55639	3.82276	0.5772	3.70225	0.55259	3.36161	0.57181	3.55211	0.52496	3.42108	0.50172	3.27321	0.48346
1	adult	0.25957	3.75352	0.37425	3.66104	0.23775	3.95821	0.48418	3.27492	0.46061	3.25889	0.61809	3.38228	0.36575	3.45862
1	adult	3.69878	0.53118	3.7743	0.61741	3.46342	0.76919	3.36856	0.62269	3.4448	0.51689	3.34402	0.52782	3.48785	0.5022
1	adult	3.45038	0.50574	3.62561	0.56561	3.42568	0.55986	2.32896	0.50383	3.42155	0.5251	3.31064	0.53865	3.10896	0.44578
1	adult	3.58278	0.56789	3.84506	0.62893	3.58665	0.6244	2.84393	0.55033	3.59675	0.49014	3.38933	0.54223	3.25173	0.46553
1	adult	3.64991	0.56286	3.62237	0.54354	3.57603	0.55522	2.83335	0.52503	3.53496	0.51932	3.52523	0.53744	3.31118	0.51989
1	adult	3.59391	0.68699	3.85723	0.60118	3.60144	0.58927	3.21144	0.59414	3.5767	0.5088	3.58163	0.55768	3.45667	0.47026
1	adult	3.67538	0.46917	3.93411	0.58508	3.67413	0.51858	2.90438	0.50883	3.47719	0.48803	3.52955	0.51413	3.30926	0.4519
1	adult	3.85572	0.60984	3.77222	0.55784	3.685	0.6082	3.42831	0.56741	3.56747	0.51341	3.4745	0.53399	3.28917	0.4833
1	adult	3.52474	0.70515	3.87585	0.67598	3.52337	0.79307	3.29686	0.85627	3.37168	0.51246	3.48858	0.81173	3.4755	0.52383
1	adult	3.66851	0.5581	3.68889	0.56983	3.58742	0.73104	3.41891	0.61882	3.54898	0.5336	3.40514	0.57499	3.50216	0.4903
1	adult	3.59155	0.5631	3.62359	0.5586	3.40358	0.62925	3.04949	0.56322	3.40947	0.47891	3.50412	0.53492	3.30653	0.45683
1	adult	3.50557	0.54228	3.82391	0.56835	3.53592	0.60251	2.66244	0.53571	3.31963	0.47743	3.36742	0.51646	3.17054	0.47663
1	adult	3.72394	0.57174	3.65067	0.93264	3.53747	0.58762	3.11408	0.5552	3.47792	0.48124	3.43273	0.53716	3.37424	0.47206
1	adult	3.47683	0.49933	3.79632	0.56635	3.36263	0.55045	3.16223	0.50965	3.64675	0.50401	3.61488	0.49053	3.29476	0.4892
1	adult	3.58164	0.5809	3.65675	0.55594	3.59656	0.56928	3.43421	0.50728	3.61704	0.4734	3.52089	0.51457	3.35889	0.48333
1	adult	3.71113	0.60416	3.91024	0.55125	3.69436	0.61725	3.24594	1.13793	3.70167	0.49188	3.55594	0.51639	3.42365	0.46747
1	adult	3.74963	0.92766	3.88478	0.67452	3.71132	0.84874	3.48858	0.65485	3.74111	0.55554	3.53585	0.70462	3.62952	0.53241
1	adult	3.66183	0.57992	3.84965	0.61369	3.39545	0.67252	3.185	0.59633	3.38022	0.49478	3.46516	0.59259	3.34497	0.48046
1	adult	3.72627	0.58419	3.8337	0.54817	3.73389	0.62858	2.94669	1.48475	3.54543	0.52573	3.37981	0.5338	3.23595	0.94268
1	adult	3.66984	0.57738	3.77482	0.60453	3.52524	0.67919	3.39857	0.57902	3.64921	0.54252	3.41389	0.56551	3.4327	0.48042
1	adult	3.58614	0.53189	3.81375	0.59984	3.63103	0.64569	3.2197	0.53859	3.62986	0.52044	3.59226	0.53283	3.42441	0.46664
1	adult	3.60861	0.51704	3.76632	0.62663	3.6417	0.60961	0.54955	0.50983	0.3573	0.41147	3.50947	0.56098	3.36624	0.45106
1	adult	3.78789	0.48299	3.82371	0.53726	3.58696	0.48856	3.08451	0.47307	3.53699	0.49388	3.4406	0.5301	3.03885	0.44438
1	adult	3.68024	0.53647	3.80751	0.57756	2.7797	0.53417	3.22806	0.51352	2.85318	0.53598	3.49889	0.56102	3.16612	0.48077
1	adult	0.38774	3.73011	0.41702	3.61428	0.2237	3.79843	0.51928	3.39666	0.48202	3.40257	0.65406	3.24619	0.37902	3.31466
1	adult	3.67782	0.58028	3.742	0.67058	3.55052	0.8488	3.29725	0.62233	3.54145	0.53421	3.51387	0.62004	3.47916	0.49823
1	adult	3.70954	0.55659	3.67828	0.65752	3.48423	0.81717	3.33091	0.61144	3.42181	0.49955	3.34599	0.61988	3.48483	0.48241
1	adult	3.67744	0.53566	3.83439	0.58797	3.57154	0.59097	3.09565	0.538	3.51205	0.50662	3.27969	0.63065	3.26933	0.45471
1	adult	3.67959	0.58094	3.70171	0.62518	3.52074	0.69352	3.51336	0.57239	3.63871	0.50554	3.46609	0.5541	3.53137	0.48083
1	adult	3.63799	0.55241	3.80321	0.6348	3.49795	0.7504	3.30397	0.83668	3.6369	0.49992	3.54895	0.58982	3.4531	0.50074
1	adult	3.59082	0.49207	3.83192	0.61361	3.52802	0.50993	2.94688	0.48507	3.40219	0.48177	3.30591	0.47092	3.00168	0.41649
1	adult	3.67505	0.46482	3.84801	0.51411	3.73267	0.53876	3.21753	0.51266	3.53057	0.49638	3.49424	0.58885	3.22755	0.45652
1	adult	0.35452	3.72836	0.53531	3.67353	0.2966	3.72326	0.73089	3.44557	0.79525	3.25489	1.01718	3.22433	0.41273	3.47657
1	adult	3.66104	0.60017	3.67517	0.55015	3.44514	0.6805	3.14801	0.52925	3.52993	0.54747	3.45547	0.62121	3.34132	0.43028
1	adult	3.58862	0.56271	3.86136	0.59811	3.64743	0.63473	2.80796	0.52507	3.49897	0.51028	3.43748	0.54299	3.31989	0.50061
1	adult	3.65706	0.59547	3.9957	0.60078	3.55301	0.64076	3.14608	0.54596	3.62682	0.50647	3.36833	0.55883	3.50458	0.49942
1	adult	3.41751	0.52547	3.72147	0.54902	3.40092	0.4971	2.66301	0.50791	3.54545	0.5326	3.27182	0.52794	3.13068	0.44963
1	adult	3.73512	0.5989	3.79587	0.56072	3.57442	0.59062	3.31087	0.56351	3.57682	0.48618	3.53392	0.57688	3.3553	0.45882
1	adult	3.66797	0.6303	3.80784	0.53059	3.66542	0.52894	3.40458	0.50751	3.63554	0.51456	3.51798	0.50898	3.39039	0.49571
1	adult	3.63626	0.68435	3.84906	0.5691	3.64239	0.58009	3.43676	0.76291	3.63046	0.54038	3.57921	0.5777	3.47302	0.5064
1	adult	0.24762	3.78593	0.35337	3.64991	0.2295	3.65859	0.41467	3.33285	0.44237	3.41725	0.60979	3.40443	0.32796	3.36793
1	adult	3.51579	0.58687	3.55863	0.54537	3.44888	0.58366	1.6928	0.52281	3.30107	0.49529	3.33385	0.51497	3.09476	0.45667
1	adult	0.22228	3.64737	0.28031	3.59061	0.23173	3.53059	0.29724	3.16593	0.3376	3.34247	0.4356	3.27637	0.27314	3.40902
1	adult	3.79624	0.70688	3.79113	0.619	3.57402	0.63447	2.91255	0.60721	3.58087	0.53568	3.42523	0.53771	3.31449	0.45784
1	adult	3.5726	0.58777	3.81105	0.5904	3.55423	0.64294	2.55484	0.52859	3.48907	0.51344	3.45726	0.56347	3.43487	0.49314
1	adult	3.79081	0.59394	3.75084	0.56287	3.4937	0.59322	3.03617	0.55996	3.50825	0.51615	3.42317	0.54523	3.41184	0.48941
1	adult	3.65122	0.58392	3.84236	0.60069	3.48175	0.55396	3.1852	0.54992	3.5356	0.48307	3.36939	0.53994	3.48735	0.49511
1	adult	3.62378	0.60659	3.78463	0.5626	3.54556	0.58397	3.46639	0.74712	3.66818	0.53149	3.58943	0.56337	3.44979	0.48631
1	adult	0.24611	3.71307	0.28511	3.838	0.21474	3.61921	0.34282	3.61242	0.36701	3.34752	0.45637	3.37854	0.32506	3.38403
1	adult	0.22621	3.66241	0.24323	3.55923	0.14931	2.4944	0.30216	2.92986	0.32305	3.3086	0.36104	3.44239	0.32274	3.23021
1	adult	0.22329	3.69335	0.26084	3.49706	0.20652	3.53487	0.29907	3.08017	0.35184	3.39723	0.41686	3.28339	0.27401	3.2237
1	adult	3.67805	0.54245	3.67917	0.55665	3.51723	0.62808	2.81924	0.50815	3.50661	0.49171	3.44601	0.55345	3.45144	0.49043
1	adult	3.64138	0.55267	3.5051	0.62945	3.63896	0.62724	2.649	0.51613	3.50115	0.52147	3.50618	0.52745	3.32422	0.46414
1	adult	3.55005	0.59044	3.73042	0.59987	3.55215	0.57651	2.55915	0.56282	3.51312	0.512	3.4157	0.53952	3.37939	0.51014
1	adult	3.51552	0.54622	3.72854	0.5412	3.38298	0.52361	1.82076	0.53063	3.26645	0.48454	3.2588	0.4804	2.87077	0.44087
1	adult	0.21731	3.66401	0.24819	3.70269	0.21895	3.80723	0.35428	3.44672	0.32936	3.47149	0.34776	3.50416	0.30795	3.43425
1	adult	0.26995	3.75419	0.32357	3.73109	0.2115	3.76005	0.40971	3.35227	0.41397	3.31884	0.68261	3.36203	0.36105	3.41985
1	adult	3.69524	0.58495	3.80308	0.5912	3.36346	0.70202	2.94774	0.59664	3.38484	0.50997	3.43193	0.62223	3.3912	0.47153
1	adult	0.22426	3.64535	0.24149	3.70507	0.1882	3.52019	0.29803	3.16054	0.3167	3.29509	0.3916	3.33684	0.28072	3.36023
1	adult	0.22825	3.63934	0.29579	3.60523	0.20673	3.54169	0.28704	3.14726	0.36802	3.20873	0.36047	3.31338	0.26842	3.52533
1	adult	3.67349	0.55153	3.71792	0.56763	3.34442	0.54464	2.26248	0.53546	3.45582	0.48163	3.3029	0.50237	3.2158	0.50476
1	adult	3.44478	0.50874	3.61364	0.51578	3.44032	0.52894	1.36392	0.51073	3.47259	0.49903	3.20053	0.47568	2.88406	0.47427
1	adult	3.40091	0.52348	3.51264	0.55305	3.44277	0.52566	2.33322	0.54988	3.36693	0.5926	3.33452	0.53836	2.97871	0.43435
1	adult	0.27881	3.80809	0.26538	3.93714	0.21682	3.72774	0.34077	3.32986	0.33327	3.3539	0.3703	3.47769	0.29711	3.50993
1	adult	0.23872	3.72925	0.28965	3.75099	0.27259	3.65887	0.36529	3.41557	0.41258	3.30946	0.55886	3.366	0.34403	3.4371
1	adult	0.22232	3.79195	0.30371	3.58715	0.19013	3.47178	0.37041	3.11786	0.37663	3.31625	0.38895	3.26136	0.26478	3.27377
1	adult	3.60324	0.57747	3.65111	0.87696	3.53742	0.66253	3.01001	0.52228	3.55163	0.46245	3.57398	0.62302	3.30053	0.46774
1	adult	0.23252	3.51616	0.26027	3.69494	0.19926	3.58014	0.29637	3.27887	0.33151	3.42019	0.4275	3.25835	0.26655	3.35401
1	adult	3.3029	0.49749	3.44365	0.49532	3.00572	0.50262	0.38015	0.4976	3.23877	0.50264	2.8504	0.45733	2.72826	0.46287
1	adult	3.66325	0.62191	3.69909	0.52221	3.61536	0.55204	3.1539	0.55835	3.6171	0.49274	3.41046	0.50356	3.33195	0.50802
1	adult	3.82407	0.52269	3.84636	0.5302	3.73327	0.51193	2.58691	0.47688	3.52188	0.47979	3.38216	0.571	3.05672	0.42689
1	adult	3.66174	0.54654	3.64315	0.52098	3.58733	0.52686	3.11362	0.53605	3.56764	0.5087	3.39844	0.55966	3.11485	0.50401
1	adult	0.26119	2.95296	0.40442	3.66232	3.65056	0.67558	0.32353	1.86154	0.34678	0.39741	0.73005	3.23016	0.34358	3.43779
1	adult	3.76444	0.56889	3.80942	0.59029	3.60531	0.68994	3.1395	0.55995	3.45779	0.51212	3.3867	0.51612	3.44391	0.48445
1	adult	0.21467	3.61475	0.26736	3.73635	0.19071	3.63911	0.31704	3.14035	0.34316	3.46503	0.41061	3.36653	0.27356	3.37042
1	adult	3.50703	0.55124	3.69269	0.56856	3.46486	0.55649	2.56299	0.50109	3.34882	0.50198	3.42091	0.506	3.12577	0.44735
1	adult	3.3505	0.52905	3.698	0.53361	3.08678	0.49242	1.30948	0.47128	3.41108	0.50673	3.00097	0.44706	2.9765	0.47655
1	adult	3.71351	0.64037	3.85659	0.57839	3.70798	0.5989	3.07744	0.57688	3.60747	0.50813	3.4894	0.50309	3.30996	0.47072
1	adult	3.62101	0.58653	3.83261	0.57395	3.73	0.59757	3.49937	0.57692	3.61342	0.49327	3.42188	0.5487	3.45666	0.49954
1	adult	0.28004	3.75553	0.25389	3.6657	0.19794	3.6724	0.31615	3.41473	0.34334	3.3348	0.35264	3.38617	0.27163	3.23771
1	adult	0.32719	3.66001	0.30884	3.43111	0.30498	3.57769	0.35483	3.01543	0.34861	3.08005	0.42009	3.1377	0.38946	3.07575
1	adult	0.2088	3.73378	0.23319	3.54107	0.20012	3.51309	0.31334	3.30832	0.26355	2.65834	0.34359	3.30181	0.27418	3.13104
1	adult	3.45804	0.61618	3.71199	0.55448	3.47649	0.59549	2.87484	0.55186	3.4507	0.50118	3.31056	0.48125	3.2116	0.47206
1	adult	3.61159	0.58941	3.8441	0.61588	3.56979	0.61075	2.97511	0.51445	3.43257	0.50276	3.28402	0.50346	3.26545	0.50058
1	adult	3.36165	0.53286	3.81024	0.59955	0.28686	0.45361	2.7009	0.55749	3.36977	0.48856	3.51088	0.50715	3.29038	0.49112
1	adult	3.77366	0.61026	3.5657	0.51737	3.643	0.61842	3.08112	0.50594	3.42275	0.47365	3.33966	0.51419	3.3622	0.47777
1	adult	3.67299	0.63902	3.83933	0.58298	3.42919	0.56667	3.38976	0.55859	3.53834	0.51777	3.19712	0.62734	3.45724	0.48799
1	adult	3.64375	0.58743	3.93297	0.58533	3.64452	0.63867	3.49743	0.65024	3.69674	0.54803	3.68266	0.57731	3.43885	0.46734
1	adult	0.26565	3.64931	0.26685	3.48446	0.29949	3.52594	0.30318	3.32882	0.31576	3.15304	0.37956	3.44104	0.31879	3.24016
1	adult	0.21245	3.73984	0.30894	3.55166	0.20028	3.55051	0.45104	3.14229	0.34693	3.21182	0.46819	3.2096	0.29471	3.2879
1	adult	3.62626	0.59446	3.76185	0.59584	3.58939	0.67449	3.10081	0.61775	3.5498	0.49272	3.48397	0.54461	3.40126	0.4954
1	adult	3.69733	0.57426	3.77943	0.60884	3.47557	0.58301	3.08634	0.58172	3.6032	0.54353	3.37657	0.49185	3.28648	0.47564
1	adult	3.61342	0.57079	3.77646	0.56838	3.48607	0.56266	2.99372	0.5537	3.4342	0.51503	3.41357	0.49826	3.20646	0.5009
1	adult	3.75229	0.53351	3.71678	0.5602	3.68831	0.66124	3.05706	0.6285	3.57189	0.50414	3.33794	0.51041	3.32854	0.44801
1	adult	3.55947	0.53488	3.67167	0.57348	3.59833	0.58209	3.2798	0.55767	3.56898	0.50904	3.4818	0.52951	3.2365	0.47439
1	adult	3.78534	0.57565	3.74254	0.57966	3.54193	0.61641	3.3233	0.55808	3.58909	0.53968	3.48948	0.53958	3.40456	0.45995
1	adult	0.24972	3.82782	0.32278	3.69181	0.22062	3.72611	0.36473	3.50968	0.39051	3.37947	0.46433	3.41159	0.33792	3.39991
1	adult	3.59734	0.56603	3.76923	0.6111	3.60265	0.62887	3.51235	0.61499	3.43269	0.48724	3.29006	0.56287	3.37601	0.50091
1	adult	0.22003	3.86123	0.24078	3.5454	0.19694	3.66089	0.30296	3.17219	0.33219	3.29426	0.36678	3.36331	0.27259	3.2439
1	adult	3.66555	0.52122	3.65614	0.57273	3.61255	0.55156	2.38731	0.53226	3.50148	0.52484	3.34054	0.51646	3.0975	0.4499
1	adult	3.5999	0.52712	3.76816	0.56558	3.64143	0.66313	3.11697	0.55245	3.54226	0.51713	3.46437	0.57423	3.40515	0.49595
1	adult	2.47549	0.47583	3.48876	0.49378	2.97822	0.3978	0.41207	0.52392	3.06408	0.46212	2.9858	0.46003	2.55551	0.42088
1	adult	3.77727	0.55554	3.75425	0.56711	3.59559	0.64207	3.40771	0.55196	3.71671	0.50001	3.51152	0.5735	3.37303	0.47032
1	adult	0.21377	3.65296	0.21881	3.69563	0.205	3.54398	0.25211	3.3202	0.29183	3.39385	0.29838	3.33371	0.27147	3.06497
1	adult	0.26518	3.75292	0.24689	3.80087	0.23263	3.76028	0.30502	3.28403	0.32497	3.45035	0.37784	3.26756	0.35981	3.29196
1	adult	0.22515	3.73391	0.30229	3.54755	0.19964	3.73206	0.46307	3.35182	0.37391	3.32302	0.48627	3.24916	0.29275	3.26202
1	adult	0.271	3.53007	0.27807	3.71918	0.20425	3.74292	0.30765	3.29846	0.3277	3.38989	0.33871	3.25903	0.29936	3.18343
1	adult	3.55819	0.53716	3.6353	0.55683	3.46317	0.51803	1.98483	0.49493	3.35033	0.50614	3.26858	0.5023	2.99681	0.42788
1	adult	3.67811	0.55542	3.72598	0.54259	3.53147	0.63028	3.25879	0.54159	3.58214	0.52858	3.52271	0.56284	3.50316	0.50253
1	adult	3.49663	0.56997	3.66931	0.54227	3.47577	0.61446	3.16471	0.54116	3.52418	0.4888	3.42771	0.54775	3.29116	0.47839
1	adult	3.63174	0.54414	3.6231	0.54273	3.39154	0.57901	2.96539	0.52156	3.5228	0.53189	3.39301	0.50417	3.10502	0.48173
1	adult	0.19822	3.71319	0.26021	3.68513	0.19302	3.55455	0.3791	3.55765	0.3562	3.52102	0.47374	3.26728	0.2779	3.46216
1	adult	0.24542	3.85927	0.39729	3.72983	0.21455	3.66358	0.50596	3.3858	0.48115	3.37671	0.75068	3.23478	0.38311	3.43905
1	adult	0.22242	3.81455	0.37676	3.47509	0.20205	3.53308	0.52311	3.48044	0.38669	3.35571	0.50502	3.24527	0.31756	3.48435
1	adult	3.7257	0.52274	3.97619	0.65008	3.50137	0.65158	3.36069	0.56153	3.66612	0.51409	3.43755	0.54731	3.33636	0.45911
1	adult	3.59152	0.53958	3.67999	0.60301	3.54057	0.5624	3.18349	0.54687	3.46428	0.49224	3.34476	0.54559	3.19121	0.45982
1	adult	3.73875	0.58013	3.69822	0.57617	3.49591	0.65193	3.32985	0.69492	3.58074	0.52802	3.40963	0.49384	3.31675	0.46171
1	adult	3.66498	0.54509	3.69403	0.62277	3.70452	0.7087	3.33616	0.82203	2.65431	1.37671	3.47332	0.55675	3.48084	0.50955
1	adult	3.78677	0.56728	3.77188	0.60745	3.6395	0.68646	3.38984	0.54129	3.63825	0.51163	3.65258	0.61292	3.50715	0.49247
1	adult	0.36658	0.74221	0.28731	3.70633	3.64978	0.61005	0.3249	2.01999	0.32617	0.40584	0.56929	3.39067	0.27898	3.4171
1	adult	0.26184	4.03747	0.29799	3.9277	0.21956	3.80289	0.30813	3.36205	0.36396	3.4437	0.38727	3.43911	0.33868	3.26582
1	adult	1.39932	2.09506	3.756	0.74561	3.38411	0.92171	1.79454	2.13498	3.41302	0.58014	3.25219	0.71402	3.42371	0.51659
1	adult	0.24929	3.86445	0.48861	3.42077	0.21035	3.48924	1.94337	2.27321	0.45285	3.32617	0.72289	3.24386	0.32601	3.22032
1	adult	3.83126	0.56616	3.68138	0.62486	3.55515	0.74129	3.19875	0.57755	3.43687	0.50429	3.38619	0.57477	3.17853	0.49765
1	adult	3.64062	0.6273	3.82187	0.72115	3.60258	0.89687	3.51612	0.68621	3.64074	0.61768	3.16564	1.17278	3.57461	0.54837
1	adult	3.53335	0.68752	3.82378	0.62166	3.46587	0.74281	3.47006	0.68853	3.50796	0.54181	3.25553	0.80377	3.428	0.48335
1	adult	3.81973	0.56968	3.7398	0.62117	3.57814	0.74479	3.29115	0.57134	3.4781	0.5027	3.43583	0.62336	3.26729	0.46926
1	adult	0.21425	3.72476	0.27408	3.64467	0.21206	3.62696	0.35757	3.42538	0.37131	3.25986	0.45097	3.29885	0.43042	3.35152
1	adult	0.248	3.67469	0.27418	0.42314	0.30837	0.46221	0.5757	3.25569	0.59614	3.30846	0.52912	3.12492	0.3626	0.38559

## Sheet: Run2
Run	LifeStage	abl_c	abl_m	dlgap_c	dlgap_m	edc4_c	edc4_m	eif4ebp2_c	eif4ebp2_m	ngef_c	ngef_m	phf_c	phf_m	slc5_c	slc5_m
2	adult	0.36074	3.60162	0.4096	3.94841	0.3033	3.88192	0.60385	3.88133	0.44343	3.6498	0.39476	3.71496	0.33635	3.56171
2	adult	0.23823	3.83785	0.39965	3.70097	0.80519	3.44767	0.55162	3.71184	0.51455	3.67264	0.77927	3.33132	0.66941	3.5817
2	adult	0.25552	3.82119	0.39974	3.95297	0.24202	3.91722	0.50171	3.69481	0.36902	3.86625	0.53781	3.69169	0.24914	3.84335
2	adult	0.23622	3.83938	0.31312	3.78003	0.19793	4.03182	0.44825	3.80499	0.33482	4.02189	0.52793	3.82203	0.22892	4.16095
2	adult	4.04383	0.61607	4.11628	0.67263	4.02289	0.8122	4.15463	0.69671	4.21273	0.59846	3.95587	0.75227	3.93628	0.64096
2	adult	4.13921	0.5662	4.05717	0.64555	4.06246	0.62527	4.21989	0.59448	4.0749	0.52479	4.05823	0.62125	3.88256	0.64903
2	adult	4.00471	0.58378	3.98066	0.64873	3.86415	0.75494	3.94405	0.58875	4.04711	0.498	3.91571	0.64383	4.10128	0.59468
2	adult	3.92296	0.62022	4.13749	0.66715	3.95043	0.79133	3.95976	0.7828	4.06432	0.59195	4.00906	0.63075	3.85427	0.55452
2	adult	0.45001	3.70976	0.61505	3.72961	0.28332	3.6904	0.80942	3.77218	0.52536	3.72627	0.76923	3.86207	0.32016	3.57686
2	adult	3.0432	1.83912	2.25702	3.02659	2.87682	1.94215	2.57394	2.54804	3.21188	1.6934	2.73346	1.91513	2.3254	2.35441
2	adult	0.23202	3.81318	0.33406	3.76668	0.189	3.99451	0.45402	3.80588	0.36716	3.83199	0.57686	3.62054	0.21237	3.94075
2	adult	0.20378	3.89333	0.30424	3.91341	0.2046	4.05091	0.40458	3.70069	0.31004	4.06562	0.38579	3.92486	0.21811	3.97024
2	adult	0.19412	3.92867	0.31721	3.82602	0.18181	3.98479	0.38827	3.97859	0.28968	3.87161	0.45223	3.96103	0.18523	3.67065
2	adult	3.88215	0.57615	4.04199	0.59606	4.02301	0.65767	3.96442	0.57815	4.17847	0.5348	3.9559	0.57873	3.78645	0.48816
2	adult	3.89476	0.58884	4.08406	0.64996	3.95089	0.77289	4.08354	0.61508	4.12044	0.56839	3.96262	0.67304	3.82296	0.50954
2	adult	3.99534	0.57018	4.22568	0.67869	3.94702	0.75128	3.84315	0.70979	4.04497	0.55822	3.87714	0.68084	4.13725	0.52926
2	adult	0.33955	3.7641	0.42792	3.73208	0.27871	3.79561	0.62001	3.64132	0.44301	3.62375	0.50006	3.73931	0.30669	3.69868
2	adult	0.29918	0.48605	0.51484	0.75431	0.26153	0.475	0.24172	0.47021	0.2385	2.41858	0.28471	0.73298	0.18399	3.3029
2	adult	0.24218	3.68195	0.27763	3.93228	0.19887	3.8339	0.37148	3.83161	0.31799	3.82319	0.43205	3.8388	0.25606	4.08606
2	adult	0.22173	3.93671	0.28185	3.7755	0.19533	3.86672	0.34262	3.78306	0.32326	3.80667	0.36559	3.79447	0.21165	4.0415
2	adult	0.23295	3.87956	0.29577	3.98155	0.17503	3.9969	0.37536	3.84261	0.28667	3.97819	0.39444	3.97401	0.19659	4.15827
2	adult	3.81827	0.57039	4.03228	0.5958	3.76068	0.91636	4.0005	0.57328	4.03259	0.55049	3.94412	0.64009	4.02748	0.55549
2	adult	3.77014	0.5536	4.04524	0.68333	3.81349	0.70465	3.94251	0.56711	3.9732	0.49315	3.8755	0.61858	3.83281	0.55453
2	adult	3.84567	0.51976	3.92874	0.60392	3.98372	0.64816	3.95059	0.52604	4.01284	0.5396	4.01846	0.69468	3.56128	0.54712
2	adult	0.32907	3.74609	0.38559	4.0186	0.29513	3.94903	0.64648	3.8265	0.44337	3.84942	0.56317	3.91751	0.34876	3.99087
2	adult	0.20522	3.77865	0.35471	3.79461	0.19684	3.8301	0.3188	3.82981	0.41745	3.71337	0.57775	3.58064	0.21144	3.8512
2	adult	0.23829	3.92403	0.269	3.76445	0.21348	3.98421	0.36786	3.889	0.33488	3.78235	0.41045	3.6562	0.24979	4.14254
2	adult	0.22237	3.84522	0.30684	3.92026	0.33781	3.65875	0.40785	3.89838	0.4266	3.84817	0.36315	3.58454	0.2587	3.9995
2	adult	3.78432	0.57803	3.9557	0.60273	3.71934	0.67609	3.95508	0.58489	4.05242	0.57946	3.83415	0.61445	3.90857	0.52964
2	adult	3.81804	0.5438	4.01801	0.58917	3.94953	0.64896	3.97835	0.56834	4.06863	0.53665	3.89159	0.54425	3.74469	0.47267
2	adult	3.82085	0.55219	3.90104	0.58688	3.86061	0.66975	3.98948	0.58937	4.05082	0.55157	3.84064	0.5989	3.82561	0.48343
2	adult	3.98404	0.55237	4.12653	0.63162	4.02622	0.72275	3.9446	0.55225	4.17926	0.52274	3.94858	0.56058	3.89727	0.47336
2	adult	0.31324	3.69223	0.41352	3.6063	0.28134	3.71718	0.67026	3.69513	0.48585	3.84542	0.59874	3.567	0.28052	3.67127
2	adult	0.24685	3.72596	0.2579	3.56698	0.18281	3.74243	0.26222	3.84957	0.44045	3.73021	0.59484	3.49197	0.22754	3.889
2	adult	0.23295	3.6748	0.25306	3.85245	0.20556	4.42453	0.33798	3.85281	0.26878	3.82283	0.33535	3.86403	0.33646	0.53862
2	adult	3.91887	0.65675	4.07417	0.63915	3.89811	0.74834	3.86078	0.5893	3.85749	0.5413	3.90513	0.60054	3.94841	0.55258
2	adult	3.89126	0.58982	4.04039	0.62266	4.07985	0.76342	4.02144	0.55746	4.21592	0.55381	4.08344	0.61553	4.02236	0.53324
2	adult	3.70162	0.5959	4.05166	0.62419	3.9199	0.71679	3.95127	0.5606	4.04679	0.52783	3.79992	0.66732	3.91269	0.53659
2	adult	3.91307	0.56383	4.04962	0.60457	3.92681	0.63982	3.96177	0.53435	4.23681	0.56904	3.99076	0.55348	3.90528	0.45245
2	adult	3.83667	0.5211	4.04916	0.58707	3.97209	0.75628	3.9433	0.62542	4.13618	0.55347	3.82219	0.66696	3.90681	0.51562
2	adult	0.3389	3.74116	0.40101	3.82915	0.28177	3.96245	0.67034	3.60937	0.45863	3.83441	0.62053	3.45472	0.3133	3.96477
2	adult	0.2497	3.70727	0.28752	3.59057	0.2026	3.76152	0.29073	3.70632	0.42969	3.70412	0.44936	3.42064	0.23132	3.91978
2	adult	0.21557	3.88385	0.29511	3.81339	0.19552	3.61534	0.33662	4.00593	0.31396	3.8793	0.39059	3.62563	0.21791	3.80259
2	adult	0.19261	3.79486	0.27767	3.81597	0.17647	3.95923	0.30496	3.94027	0.31414	3.84234	0.45043	3.84146	0.20193	3.66392
2	adult	4.00756	0.60994	4.11677	0.61484	4.00517	0.70993	4.0083	0.58382	3.99655	0.54253	3.93476	0.6044	4.04635	0.52199
2	adult	3.81076	0.57945	3.9717	0.67328	3.77868	0.69623	3.76606	0.54715	4.11161	0.55839	3.861	0.56337	3.73975	0.56558
2	adult	3.93127	0.57658	4.07668	0.6034	4.00995	0.72387	4.22516	0.59192	4.03462	0.54757	3.91743	0.53065	4.1228	0.51587
2	adult	3.62916	0.63632	4.12223	0.64764	3.89437	0.77165	4.00199	0.56908	4.18782	0.53302	3.94524	0.61749	3.89818	0.48948
2	adult	0.27957	0.44536	0.25437	0.48914	0.19174	3.79362	0.2344	0.44341	0.25321	2.44721	0.48653	2.88208	0.22479	0.45591
2	adult	0.21025	3.76147	0.23601	3.72386	0.17389	3.71618	0.2112	3.66652	0.35688	3.88016	0.63576	3.44068	0.2225	3.8194
2	adult	0.22946	3.89842	0.28996	3.7019	0.20871	3.80273	0.30745	3.68416	0.28744	4.0524	0.37679	3.73935	0.22966	3.88272
2	adult	0.20253	3.74371	0.2663	3.97122	0.19071	3.90165	0.32307	3.87675	0.27704	3.90738	0.39092	3.95947	0.22801	3.83424
2	adult	3.84313	0.57096	3.96192	0.60478	3.9484	0.62044	3.76077	0.53079	3.85164	0.50313	3.74408	0.56441	3.67856	0.50267
2	adult	3.85696	0.51761	4.06763	0.59279	3.93205	0.60508	3.9226	0.53437	4.28574	0.54067	3.93032	0.61882	3.74575	0.52416
2	adult	3.7642	0.52004	4.14397	0.5859	3.97743	0.64801	3.87623	0.52336	4.00905	0.51048	3.82965	0.58968	3.90104	0.51748
2	adult	3.94421	0.55374	4.15516	0.58416	4.05312	0.63409	3.86993	0.55388	4.05069	0.52585	3.9596	0.65781	3.83667	0.50084
2	adult	0.22366	3.70991	0.40957	3.78526	0.20045	3.89576	0.34403	3.88418	0.48959	3.83302	0.69003	3.32097	0.22803	3.85921
2	adult	0.1994	3.88875	0.25232	3.91558	0.17577	3.65993	0.44426	3.66694	0.35187	3.61524	0.38812	3.58819	0.1853	3.99545
2	adult	0.21055	3.79672	0.30224	4.04326	0.1963	3.81203	0.2966	3.7145	0.29614	4.13057	0.37825	3.94135	0.24703	3.95791
2	adult	0.23322	3.64605	0.28334	3.89867	0.23237	3.82461	0.36365	4.05141	0.33674	4.02885	0.35338	3.83131	0.22139	4.08218
2	adult	3.89349	0.57873	4.11613	0.62824	4.02697	0.68051	3.90714	0.56787	4.11596	0.52344	3.82438	0.55066	3.7675	0.50838
2	adult	4.06303	0.5619	4.1938	0.55976	3.92162	0.57942	3.95216	0.5664	4.22111	0.56155	3.89623	0.56978	3.99754	0.51504
2	adult	4.00734	0.58644	4.05997	0.55752	3.90384	0.60043	3.83162	0.54499	4.16042	0.5542	3.9819	0.58443	3.99676	0.5169
2	adult	3.94041	0.54576	4.1998	0.62281	4.0355	0.69926	3.878	0.51025	4.02046	0.48918	3.98977	0.59992	4.05385	0.54512
2	adult	0.26016	3.92148	0.35073	3.82007	0.19855	3.74635	0.39679	3.76642	0.51148	3.94791	0.58966	3.61511	0.21163	3.78026
2	adult	0.19673	3.86213	0.52326	3.82903	0.16422	3.73521	0.24939	3.70806	0.3371	3.77797	0.39009	3.66867	0.18542	4.07684
2	adult	0.20458	3.96998	0.2899	3.85532	0.21915	3.74112	0.29121	3.71192	0.27782	3.81929	0.34532	3.79651	0.20059	3.90774
2	adult	3.91695	0.57635	4.00252	0.56524	3.71339	0.61915	3.85283	0.53656	4.31647	0.56575	3.95604	0.59009	3.72466	0.5107
2	adult	3.78848	0.54401	3.9351	0.55468	3.96837	0.69006	4.00461	0.59629	4.25278	0.51493	4.05089	0.6597	4.00626	0.51446
2	adult	3.84382	0.60501	4.09478	0.60306	3.9793	0.67268	3.84795	0.5787	4.22347	0.5349	3.97964	0.62768	3.96494	0.51651
2	adult	3.94593	0.60428	3.99074	0.6227	3.95667	0.69129	3.92897	0.55255	4.16596	0.53069	4.0307	0.63294	3.99185	0.56065
2	adult	4.02368	0.49489	4.06336	0.60561	4.12524	0.63531	3.99597	0.5596	4.22352	0.50389	4.01731	0.60008	3.98468	0.47293
2	adult	0.28521	3.67444	0.35521	3.80408	0.23251	3.86125	0.49383	3.72424	0.42851	4.0602	0.54049	3.5841	0.2446	3.6757
2	adult	0.22283	1.8094	0.1734	3.91782	0.1816	3.63981	0.53189	2.85881	0.23115	3.51835	0.27558	3.09415	0.17827	3.77801
2	adult	0.20957	3.90272	0.22361	3.74889	0.18401	3.99681	0.28566	3.78657	0.27514	3.84144	0.31329	3.78083	0.19889	4.04381
2	adult	0.20995	4.07438	0.24747	3.92106	0.19116	3.79476	0.29811	3.71132	0.27063	3.88941	0.32709	3.78214	0.19311	3.85867
2	adult	3.95988	0.63602	4.04471	0.62646	3.91168	0.73822	3.98705	0.58898	4.18244	0.55092	3.92773	0.57608	3.82961	0.518
2	adult	3.93758	0.62642	4.03477	0.60166	3.9297	0.71378	3.82732	0.61088	4.19366	0.55952	3.82505	0.58396	4.00652	0.56164
2	adult	3.86855	0.52649	3.94973	0.55662	3.84225	0.57979	3.74456	0.55007	3.95357	0.4954	3.84367	0.56436	3.69938	0.48223
2	adult	4.0111	0.61136	4.0167	0.60194	2.78202	2.45412	3.78391	0.54926	4.04053	0.52532	3.91769	0.66421	3.77688	0.54891
2	adult	0.26593	3.70361	0.35005	3.95771	0.24134	3.93427	0.45073	3.66819	0.40649	3.86383	0.48155	3.78185	0.26056	3.93194
2	adult	0.21533	3.8956	0.25509	4.00012	0.19929	4.08972	0.3623	3.90427	0.34003	3.98296	0.41048	3.6457	0.21031	3.81038
2	adult	0.32844	3.79338	0.42119	4.02308	0.32644	3.88989	0.42963	3.88557	0.43605	3.65427	0.41391	3.5887	0.28748	3.73626
2	adult	0.20228	3.98284	0.25063	4.00771	0.18674	3.94627	0.30753	4.02805	0.27156	4.0479	0.29783	3.86991	0.20024	3.83947
2	adult	3.98391	0.56074	4.29229	0.5895	2.49918	2.37706	4.06672	0.56448	4.13115	0.51849	3.95833	0.63483	3.89352	0.48913
2	adult	3.84316	0.55236	4.17011	0.61172	3.88417	0.70147	3.94281	0.68245	4.1644	0.53813	3.92985	0.64001	4.00115	0.53975
2	adult	2.52793	1.35935	3.0135	1.45133	2.84999	1.41094	2.56678	1.24415	2.96048	1.30148	2.84588	1.32019	2.52394	0.93604
2	adult	4.03498	0.54258	4.13791	0.61812	3.99928	0.6833	3.75075	0.85783	4.18794	0.54838	4.0578	0.64321	3.93468	0.52974
2	adult	0.26894	3.94529	0.4169	3.78611	0.21769	3.88393	0.57867	3.78588	0.43942	3.74148	0.68187	3.70171	0.24778	3.87853
2	adult	0.23324	3.81565	0.27028	3.83051	0.24457	3.96773	0.41502	3.81428	0.34084	3.88069	0.44975	3.61827	0.21366	3.79519
2	adult	3.92002	0.59924	4.07764	0.58323	3.87727	0.76087	4.0333	0.66231	4.0284	0.54137	3.91447	0.66191	3.82305	0.51291
2	adult	0.20956	3.92307	0.27415	3.82815	0.19568	3.85768	0.35313	3.75385	0.32906	4.06138	0.4823	3.82195	0.21012	3.88933
2	adult	4.04694	0.62594	4.12775	0.60155	3.83417	0.67249	4.22301	0.61689	4.1081	0.54284	3.96251	0.65059	3.88555	0.54658
2	adult	3.9933	0.59912	3.95404	0.6013	4.01851	0.73832	4.03701	0.62037	4.15065	0.51839	3.97862	0.60778	3.98312	0.54378
2	adult	3.91	0.58755	4.05061	0.60514	4.04568	0.81529	3.91798	0.56356	4.34811	0.57749	3.9069	0.69191	3.82979	0.51343
2	adult	3.96381	0.55244	3.96245	0.55559	3.92133	0.85233	3.86708	0.56764	4.16142	0.57702	4.01188	0.64729	3.79412	0.5188
2	adult	3.77429	0.68759	3.91127	0.72558	3.80017	0.87591	3.83421	0.785	3.86792	0.67174	3.82896	0.72235	3.83131	0.63077
2	adult	3.93181	0.6277	4.08752	0.63036	3.95776	0.83146	3.99987	0.64946	4.12358	0.57638	3.81012	0.63642	3.87105	0.54036
2	adult	3.60332	0.66417	4.1601	0.6685	3.81538	0.63774	3.58115	0.51563	3.9736	0.48028	3.37328	0.64047	3.78383	0.5041
2	adult	0.26064	0.43671	2.3504	0.46253	1.77862	0.51914	1.44109	0.4688	0.22425	0.46502	0.36325	0.51935	3.34704	0.53738
2	adult	0.24731	3.83799	0.29951	3.90245	0.22039	3.95097	0.34242	3.93452	0.27417	3.87682	0.30739	3.86174	0.24544	4.05128
2	adult	0.24815	3.57277	0.31441	3.64941	0.2423	3.82816	0.35061	3.70053	0.30643	3.95916	0.32641	3.71474	0.23778	3.71843
2	adult	0.24293	3.56072	0.30404	3.63347	0.23721	3.78028	0.33972	3.69052	0.30968	3.69876	0.34656	3.62523	0.2467	3.58701
2	adult	0.33135	3.38763	0.35215	3.58697	0.30594	3.71456	0.38037	3.5556	0.3551	3.50813	0.36764	3.51512	0.28286	3.5151
2	adult	3.90103	0.73489	3.91047	0.74189	3.7042	0.99748	3.90293	0.83472	3.95923	0.72132	3.78276	0.73446	3.73481	0.58445
2	adult	3.95276	0.61846	4.09175	0.64993	3.93951	0.72399	3.98058	0.74031	4.05582	0.56594	3.8226	0.65405	3.90842	0.55194
2	adult	3.72318	0.57466	3.90513	0.61682	4.11823	0.67298	3.81159	0.56905	3.87576	1.2366	3.9649	0.62529	1.07622	3.28318
2	adult	3.80175	0.80353	4.02982	0.6783	3.91282	0.87088	3.88962	0.90387	3.96454	0.71293	3.7242	0.87902	3.80287	0.60584
2	adult	0.34612	2.67749	0.32644	3.61941	0.28908	3.64296	0.32582	3.65501	0.31695	3.53697	0.34377	3.31641	0.382	2.63002
2	adult	0.25824	3.83584	0.33285	3.93098	0.22724	3.85823	0.32385	3.9459	0.30414	3.88335	0.34387	3.86146	0.27493	3.98921
2	adult	0.26607	3.95056	0.30108	3.76358	0.24398	3.90676	0.31967	3.87482	0.27071	3.6362	0.30504	4.09606	0.24411	3.78789
2	adult	0.30614	3.58136	0.33684	3.4482	0.28058	3.68349	0.36845	3.84164	0.34352	3.64592	0.34009	3.55942	0.28253	3.69067
2	adult	3.82515	0.69735	3.94037	0.67472	3.67754	0.92186	3.82694	0.65773	3.93374	0.6105	3.76919	0.72045	3.75073	0.6308
2	adult	3.94017	0.62516	3.82503	0.62178	3.9119	0.79893	3.91511	0.61262	3.97014	0.54253	3.17169	0.80918	3.76051	0.50481
2	adult	3.65404	0.61047	4.13523	0.69408	3.77191	0.81126	3.67465	0.6354	4.1338	0.60101	3.89343	0.68482	3.93725	0.58058
2	adult	3.67489	0.59787	4.05826	0.66393	3.8383	0.71125	3.79238	0.56292	4.00005	0.56915	3.59716	0.65144	3.77263	0.53429
2	adult	0.26447	3.66856	0.27211	3.51909	0.23219	3.76107	0.33599	3.8475	0.34617	3.73398	0.28845	3.97792	0.46909	3.87007
2	adult	0.24307	3.6048	0.27084	3.6762	0.25167	3.86093	0.33388	3.79886	0.2892	3.8307	0.2974	3.79619	0.23431	3.68115
2	adult	0.22744	3.56944	0.30789	3.86573	0.21367	3.89174	0.30556	3.82288	0.30036	3.69693	0.34936	4.09961	0.22254	3.61187
2	adult	0.70049	0.39	3.3312	0.45479	3.49863	0.44324	2.65706	0.49752	3.60245	0.47495	3.01412	0.5035	2.80759	0.4423
2	adult	3.8945	0.71652	3.82894	0.66769	3.70032	0.97135	3.88486	0.69531	4.07789	0.63162	3.72485	0.71539	3.94408	0.56108
2	adult	3.89947	0.64975	4.01712	0.61753	3.95937	0.76994	3.98852	0.58048	3.92534	0.57603	3.96888	0.69887	4.04366	0.57727
2	adult	0.21675	3.80173	0.33187	3.63956	0.1954	3.96949	0.42141	3.68381	0.49193	3.48366	0.53162	3.58877	0.21202	3.77627
2	adult	3.06309	0.57752	3.95839	0.58117	3.88255	0.59266	3.38024	0.57035	3.73477	0.53785	3.58573	0.61162	3.3592	0.55823
2	adult	2.78575	0.58622	3.7269	0.55008	3.71809	0.57134	3.206	0.53301	3.93388	0.55828	3.4425	0.61479	3.2539	0.54403
2	adult	0.25173	3.83022	0.27846	3.79299	0.21831	3.8427	0.3164	3.9629	0.34034	3.86768	0.29499	3.84221	0.27381	3.89445
2	adult	0.22157	3.74358	0.31294	3.86673	0.20534	3.81241	0.30857	3.93263	0.29606	3.78749	0.32008	3.77107	0.22122	3.77111
2	adult	3.18636	0.42394	3.44751	0.49533	3.27122	0.43127	3.08143	0.46229	3.43949	0.48906	3.15039	0.53186	3.12942	0.41315
2	adult	3.69698	0.70293	3.89013	0.75245	3.71692	1.02985	3.94001	0.70991	3.93571	0.6242	3.98948	0.71701	3.8826	0.57704
2	adult	3.83765	0.5488	3.9602	0.63497	3.83998	0.73556	3.87762	0.61191	4.14321	0.63592	3.73248	0.60223	3.92853	0.61129
2	adult	3.85419	0.6024	3.85647	0.59633	3.8267	0.78645	3.92591	0.63146	4.06398	0.57508	3.77057	0.67968	3.86093	0.51852
2	adult	3.34864	0.56147	3.80547	0.59922	3.80992	0.70037	3.47541	0.53619	3.94597	0.52726	3.63704	0.59371	3.60332	0.56759
2	adult	3.68969	0.50439	3.92692	0.59583	3.95323	0.62017	3.65484	0.52415	3.87554	0.55468	3.69404	0.60879	3.72215	0.54567
2	adult	0.30595	3.75985	0.30936	3.66528	0.25257	3.75965	0.30432	3.76988	0.31097	3.80946	0.30089	3.6042	0.29363	3.61073
2	adult	0.26414	3.46219	0.32474	3.73931	0.24567	3.81839	0.30137	3.72342	0.3285	3.90648	0.29658	3.80499	0.28605	3.73257
2	adult	3.27284	0.47316	3.66304	0.54251	3.48373	0.46004	3.16645	0.49488	3.75656	0.50863	3.48945	0.52779	3.46416	0.46826
2	adult	3.87124	0.60454	4.03376	0.68179	3.90947	0.73701	3.99427	0.68679	3.87567	0.62038	4.0312	0.65914	3.71411	0.52965
2	adult	3.08983	0.8288	4.08319	0.71019	3.86797	0.70954	2.79102	0.50147	4.06645	0.54865	3.49632	0.57797	3.22689	0.4328
2	adult	0.28092	0.48401	0.28323	0.47889	0.28268	0.46494	2.25463	0.52448	0.2501	0.40989	1.58871	0.43785	0.22732	0.40921
2	adult	3.09852	0.53208	3.93239	0.58891	3.6789	0.57154	3.29873	0.56372	3.96283	0.55746	3.46366	0.583	3.43481	0.57888
2	adult	3.21224	0.5547	3.76514	0.57625	3.58132	0.56601	3.29951	0.56329	3.94913	0.6204	3.50423	0.59158	2.98945	0.53761
2	adult	0.32288	3.59983	0.37009	3.84084	0.23614	3.7213	0.27616	3.94056	0.31885	3.98394	0.27832	3.63527	0.26812	3.9202
2	adult	0.29404	3.5319	0.30925	3.50142	0.26516	3.80102	0.28477	3.6132	0.32046	3.80299	0.2966	3.63235	0.27201	3.58949
2	adult	0.61361	0.43736	2.64396	0.65541	3.35293	0.4554	2.34649	0.49879	3.76596	0.56269	2.70527	0.53246	2.98604	0.43022
2	adult	3.78888	0.60872	4.02466	0.66627	3.75899	0.77905	3.94294	0.61674	4.00815	0.55938	3.96166	0.63316	3.79341	0.56557
2	adult	3.88618	0.57851	3.9653	0.58663	3.87484	0.73718	3.96275	0.55759	4.07474	0.57359	3.71486	0.60279	3.84559	0.53345
2	adult	3.95633	0.63291	4.09105	0.6426	3.86694	0.7483	4.2439	0.57378	4.07596	0.52881	3.85788	0.57222	4.04386	0.54641
2	adult	3.61985	0.56637	3.90729	0.57336	3.96065	0.6274	3.70067	0.5557	4.01021	0.52486	3.68323	0.59172	3.56765	0.58215
2	adult	0.94369	0.51781	2.15199	0.54035	2.88954	0.53248	2.10684	0.53263	3.55275	0.55242	2.29414	0.58938	1.90589	0.5906
2	adult	0.26152	3.61198	0.31717	3.66557	0.23769	3.61075	0.29285	3.67631	0.33421	3.54509	0.28722	3.69711	0.28923	3.38526
2	adult	0.25725	3.41941	0.29954	3.61404	0.26013	3.99154	0.29022	3.73662	0.30811	3.6867	0.28526	3.74772	0.29682	3.57427
2	adult	1.33949	0.43558	3.54605	0.48597	3.56926	0.46418	3.16083	0.49754	3.85215	0.50867	3.19569	0.5513	3.22489	0.64263
2	adult	3.67931	0.78989	3.93521	0.73932	3.82173	1.03038	2.94162	0.547	4.03499	0.62359	3.743	0.66906	3.98361	0.52749
2	adult	3.87898	0.59902	4.19078	0.61008	3.92596	0.82466	3.94003	0.56276	4.06334	0.54363	3.79468	0.61929	3.78547	0.52057
2	adult	3.92894	0.6104	3.93324	0.57584	3.75056	0.69494	3.98576	0.57944	4.15179	0.52294	3.88311	0.66845	3.99506	0.53651
2	adult	2.27275	0.55778	2.91178	0.53762	2.93311	0.52954	2.73154	0.52233	3.49127	0.50604	2.61758	0.52315	2.47665	0.57645
2	adult	3.38375	0.55895	3.86751	0.57762	3.81346	0.60879	3.62939	0.57993	3.92605	0.57313	3.53256	0.59774	3.52288	0.54571
2	adult	0.29432	3.63154	0.36903	3.90164	0.27281	3.73214	0.29317	3.62907	0.3199	3.83413	0.29309	3.582	0.28741	3.83915
2	adult	0.27168	3.38973	0.29541	3.78122	0.26435	3.71089	0.28512	3.68837	0.29617	3.66702	0.29335	3.72466	0.27657	3.6094
2	adult	2.5976	0.44378	3.52279	0.49234	3.55397	0.44504	2.77101	0.46479	3.53831	0.43245	3.25768	0.52504	3.14695	0.39885
2	adult	3.70052	0.7683	3.91611	0.72414	3.73295	1.02465	4.00389	0.5899	4.09097	0.59574	3.73218	0.66266	4.00219	0.5316
2	adult	3.98331	0.62023	4.10407	0.5724	3.93436	0.7876	3.83497	0.67763	4.29088	0.58231	4.02126	0.67516	3.88272	0.51454
2	adult	3.94353	0.58094	3.98915	0.54614	3.95119	0.71376	3.98803	0.62895	4.13947	0.53262	3.88349	0.57103	3.935	0.5007
2	adult	3.78925	0.61224	4.11992	0.59178	4.01103	0.70187	3.36391	0.8515	4.0929	0.56342	3.7254	0.62192	3.89283	0.56132
2	adult	0.22511	3.74316	0.25679	3.73013	0.22028	3.80119	0.27395	3.77363	0.2893	3.84164	0.28809	3.76124	0.22469	3.65551
2	adult	0.23735	3.66943	0.28351	3.74444	0.21941	3.55856	0.31354	3.91641	0.29961	3.95249	0.29316	3.86741	0.24194	3.6619
2	adult	0.35976	3.00697	0.30028	3.4989	0.2992	3.61662	0.31066	3.65667	0.33919	3.71412	0.33075	3.74894	0.33746	3.31458
2	adult	2.53859	0.44453	3.43442	0.44222	3.63162	0.43797	2.98171	0.50708	3.82259	0.42485	3.33936	0.5161	3.2059	0.45608
2	adult	3.82586	0.62992	4.00098	0.69945	3.83084	0.94738	4.02664	0.6678	3.91444	0.56928	3.96439	0.69621	3.80652	0.51656
2	adult	3.89841	0.58562	4.00768	0.55249	3.64991	0.7186	3.76761	0.68546	4.03117	0.52565	3.9069	0.61064	3.86391	0.53618
2	adult	2.79253	0.54188	0.99894	2.65287	3.51651	0.55325	3.22808	0.52053	3.13163	0.42123	1.49805	0.47636	0.26793	0.43999
2	adult	2.33031	0.49311	3.81976	0.56836	3.25395	0.49382	2.9411	0.57051	3.74429	0.56207	2.99152	0.5862	3.22771	0.55462
2	adult	0.2648	3.69028	0.27836	3.80377	0.24599	3.92546	0.30076	3.71391	0.29868	3.90416	0.28657	4.11257	0.34887	3.95956
2	adult	0.25938	3.81156	0.29428	3.72436	0.23978	3.88635	0.35228	3.96797	0.28998	3.92096	0.30604	3.96278	0.24618	3.64288
2	adult	0.27141	3.44023	0.33146	3.63624	0.27746	3.61789	0.32307	3.74932	0.32438	3.81058	0.29295	3.53402	0.30927	3.44511
2	adult	3.20691	0.45959	3.75022	0.46467	3.78915	0.44101	3.32738	0.52238	3.66759	0.45008	3.3676	0.52886	3.38926	0.47657
2	adult	3.86479	0.61072	3.98204	0.64717	3.76478	0.838	3.9791	0.64342	4.01559	0.62194	3.85978	0.63209	3.88778	0.55576
2	adult	3.85597	0.6289	4.1263	0.64106	3.86568	0.88758	4.01093	0.7035	4.0792	0.54789	3.76082	0.66529	3.94766	0.53551
2	adult	2.18316	1.24729	0.24026	3.7553	0.16994	3.82964	0.78037	3.26475	3.84075	0.49046	0.40992	3.60067	0.23739	0.44116
2	adult	3.70784	0.54593	3.37928	0.57394	3.91918	0.64966	3.8213	0.71432	3.45199	0.55703	3.84582	0.6546	3.5234	0.53651
2	adult	0.24513	3.67548	0.28225	4.08289	0.22555	3.83691	0.30427	3.88916	0.28353	3.85249	0.30054	4.06894	0.23772	3.68992
2	adult	0.23883	3.68664	0.29656	3.80143	0.22871	3.77842	0.33858	3.75557	0.28181	3.74751	0.29793	3.72622	0.25114	3.6731
2	adult	0.28932	3.57459	0.33351	3.60729	0.2636	3.78888	0.34747	3.68686	0.31635	3.65576	0.32207	3.70864	0.2866	3.62066
2	adult	3.81637	0.47028	4.03784	0.52555	3.82354	0.53103	3.4429	0.6637	3.92067	0.46163	3.67526	0.55557	3.40337	0.46214
2	adult	3.88773	0.63612	4.12662	0.73831	3.83459	0.86474	4.02037	0.742	4.13491	0.63348	3.94746	0.63598	3.94005	0.57279
2	adult	3.90303	0.58733	4.07289	0.58251	3.94982	0.71823	4.02641	0.64789	4.08415	0.63179	3.86635	0.63023	3.87421	0.49542
2	adult	3.62714	0.65142	4.17022	0.75595	3.8506	0.95106	3.75971	1.05215	4.12925	0.56296	3.87086	0.79593	3.92157	0.5713
2	adult	3.36919	0.67539	3.97748	0.60695	3.82485	0.63208	3.69901	0.55589	4.20397	0.58463	3.67634	0.79188	3.70803	0.55557
2	adult	0.25656	3.74455	0.30766	3.74557	0.24686	3.98421	0.40014	3.8293	0.38064	4.09173	0.33479	3.88171	0.32219	3.91626
2	adult	0.29092	3.7356	0.35438	3.91512	0.24449	3.84525	0.38288	3.7533	0.37228	3.99588	0.35049	3.68828	0.27352	3.8025
2	adult	0.2662	3.39514	0.33177	3.60949	0.25009	3.76041	0.39571	3.66503	0.34099	3.68737	0.34158	3.73691	0.28579	3.69786
2	adult	3.79319	0.56783	4.0181	0.63436	4.04064	0.57098	3.76732	0.63186	4.05327	0.60199	3.95982	0.8259	3.82941	0.53289
2	adult	0.25799	3.75543	0.3485	3.95233	0.21695	3.67638	0.48283	3.8489	0.35128	3.82218	0.42276	3.70836	0.28167	3.78342
2	adult	0.23353	3.7177	0.33607	4.46662	0.21103	3.94888	0.43284	3.96976	0.33593	3.85352	0.35042	3.80621	0.31005	3.94609
2	adult	0.22346	3.96404	0.29716	3.7569	0.19938	3.84126	0.40891	3.99477	0.2997	3.94086	0.39686	4.01336	0.23452	3.9153
2	adult	4.15904	0.52752	4.1469	0.61132	3.94534	0.54293	3.87665	0.55071	3.99969	0.44593	4.06258	0.61606	4.00051	0.56785
2	adult	0.24013	3.78103	0.35198	3.91883	4.03711	0.5274	1.43293	1.84633	3.70082	0.75876	0.31513	3.84078	0.22831	4.05516
2	adult	3.90348	0.50162	4.2583	0.53074	4.24079	0.55896	3.9516	0.54957	4.11386	0.55656	3.85019	0.65188	4.0869	0.51935
2	adult	4.06111	0.55198	4.02175	0.58519	4.12205	0.69414	3.88576	0.6384	4.11597	0.58638	3.98933	0.62467	3.92247	0.50474
2	adult	1.43285	0.41906	3.22005	0.52235	3.29251	0.50444	2.72509	0.51096	3.45483	0.5157	3.01248	0.68364	2.98727	0.48134
2	adult	0.2307	4.03736	0.3044	4.0083	0.18593	3.85777	0.43265	3.86241	0.30067	3.74318	0.39969	3.68266	0.19327	3.74816
2	adult	0.25854	4.34445	0.31962	3.89962	0.20933	3.90796	0.47049	3.67993	0.35018	4.24137	0.4316	3.80645	0.24234	3.90921
2	adult	0.20952	3.90134	0.29044	3.80981	0.187	3.94196	0.39963	4.00524	0.29624	3.99666	0.37524	3.64824	0.21594	4.00428
2	adult	3.85352	0.53427	4.17922	0.55904	3.90495	0.50094	3.8436	0.53924	3.87719	0.51455	3.88553	0.64394	3.77203	0.49975
2	adult	3.86876	0.57891	4.0465	0.62796	4.17191	0.57856	3.84509	0.63439	4.26876	0.61803	3.75083	0.67232	3.70938	0.6069
2	adult	4.10791	0.51106	4.13241	0.62107	4.13317	0.59485	3.89709	0.66274	4.06132	0.52987	4.08206	0.67484	3.9379	0.54081
2	adult	3.99812	0.51087	4.22779	0.55284	4.05575	0.51269	3.82485	0.5791	4.22434	0.54052	3.8041	0.57042	3.79088	0.42936
2	adult	3.72975	0.81037	4.07482	0.76239	3.69395	1.05852	3.98521	0.53266	4.04373	0.63874	3.72579	0.76229	3.83052	0.56422
2	adult	3.83851	0.52045	3.98002	0.56626	3.81526	0.54151	3.81405	0.51703	4.1077	0.51557	3.97489	0.61278	3.95108	0.57212
2	adult	0.21985	3.75427	0.34882	3.99923	0.18977	3.79517	0.3721	3.88307	0.34266	3.92875	0.42079	3.86069	0.20377	3.89686
2	adult	3.81064	0.56346	3.97833	0.56091	4.19401	0.60093	3.71534	0.55665	4.07548	0.54553	4.03029	0.63289	3.8161	0.52137
2	adult	3.85594	0.48463	4.23759	0.54587	3.99041	0.47143	3.94921	0.52519	4.25756	0.58023	3.72129	0.51621	3.7748	0.47663
2	adult	3.77386	0.45835	4.11456	0.53982	3.92524	0.54172	3.80674	0.54874	4.1591	0.52373	3.8865	0.60806	3.5907	0.44847
2	adult	4.04767	0.51578	4.29673	0.56148	4.07324	0.57411	2.87577	0.58541	4.17203	0.56745	4.06465	0.61672	3.73525	0.50135
2	adult	2.15628	2.87779	2.54339	3.01732	2.38159	2.99283	2.14899	3.00632	2.14313	4.01114	2.11985	2.70176	1.95224	2.50086
2	adult	1.46949	0.44051	3.28119	0.46937	3.34495	0.4952	3.23504	0.54585	3.54189	0.56626	3.12233	0.66567	2.70822	0.52956
2	adult	3.90613	0.52704	3.99515	0.58533	4.00068	0.50266	3.84431	0.54518	4.12436	0.52793	3.74365	0.55016	3.85639	0.4581
2	adult	0.20449	3.7687	0.26077	3.83277	0.19142	4.03495	0.35597	3.64853	0.33034	3.77399	0.42863	3.58173	0.20006	3.87422
2	adult	3.79964	0.54807	4.00645	0.58633	4.03946	0.55612	3.83322	0.53058	4.21857	0.53867	3.83584	0.56533	3.83795	0.53123
2	adult	3.76497	0.5258	4.01785	0.55244	3.88134	0.54038	3.88331	0.5809	4.10191	0.53438	3.82464	0.54582	3.6883	0.534
2	adult	3.72484	0.4673	4.00032	0.54754	3.91884	0.55606	3.87385	0.56285	4.02249	0.5507	3.55823	0.54443	3.56234	0.59164
2	adult	3.87589	0.51386	4.16186	0.58253	4.08398	0.53509	3.97971	0.59707	4.20443	0.52561	4.05574	0.61155	3.67199	0.51004
2	adult	0.28378	3.83452	0.38089	3.84785	0.22431	3.97193	0.42201	3.59772	0.36949	3.81898	0.51914	3.86037	0.22723	3.78845
2	adult	3.20988	0.49179	3.44942	0.50925	3.44485	0.51841	3.52468	0.56675	3.80725	0.61245	3.26851	0.61209	3.33919	0.47646
2	adult	3.92308	0.55385	4.37343	0.59292	4.09946	0.62249	3.85824	0.50857	4.05829	0.51438	3.81236	0.57383	3.76304	0.50291
2	adult	0.22828	3.8302	0.24681	3.85081	0.18197	3.70916	0.31303	3.92419	0.35602	3.88672	0.36779	3.70501	0.21145	3.90228
2	adult	3.853	0.53032	4.08904	0.58992	4.03114	0.58099	3.93793	0.51338	4.13173	0.4998	4.12035	0.63179	3.91584	0.51955
2	adult	3.98065	0.5522	4.0383	0.60846	4.00648	0.65575	3.8363	0.5574	4.09738	0.52192	3.90054	0.59184	3.86032	0.49753
2	adult	3.85884	0.58157	3.88156	0.51645	3.90001	0.49802	3.7046	0.54154	3.97792	0.52051	3.74338	0.56549	3.56655	0.52673
2	adult	3.77275	0.4873	4.10814	0.57451	4.16546	0.59487	3.81397	0.59259	4.0074	0.52278	3.88822	0.6163	3.82269	0.54039
2	adult	0.20939	3.68111	0.53232	3.86298	0.24673	3.89316	0.38386	3.80036	0.55415	3.67118	0.52281	3.58033	0.23531	3.59175
2	adult	2.61479	0.48278	3.22493	0.47074	3.63853	0.51866	3.03639	0.50599	3.86726	0.55168	3.51721	0.67653	3.36683	0.51487
2	adult	4.10879	0.56898	4.27657	0.59418	3.93349	0.52737	3.87637	0.51246	4.21263	0.55158	3.92701	0.52464	3.75719	0.47312
2	adult	0.19969	3.74978	0.2929	4.01205	0.20412	3.89948	0.36889	3.89041	0.36958	3.64506	0.41102	3.60071	0.20417	3.74903
2	adult	2.96362	0.51688	3.99008	0.46756	3.96426	0.48496	3.37762	0.53082	4.09774	0.51868	3.53118	0.52017	3.36704	0.50103
2	adult	3.71481	0.47703	4.15444	0.56315	3.99299	0.53751	3.82936	0.51016	4.06231	0.4738	3.84498	0.52319	3.80745	0.45459
2	adult	3.82704	0.50372	3.92905	0.55404	4.09031	0.62113	3.79418	0.55001	4.26644	0.54237	4.0022	0.58304	3.73188	0.4765
2	adult	3.74709	0.49368	4.18428	0.54859	4.2152	0.5079	3.54276	0.50064	4.13159	0.47601	4.00292	0.66876	3.62691	0.43914
2	adult	0.24406	3.58794	0.33621	3.77768	0.22211	3.69256	0.40203	3.99058	0.34639	3.6174	0.47451	3.5927	0.20798	3.54344
2	adult	3.10322	0.4752	3.40075	0.51095	3.38453	0.47534	3.01082	0.49841	3.44682	0.47751	3.27879	0.58913	3.16629	0.47503
2	adult	0.21294	3.78462	0.28893	3.88632	0.17976	3.71022	0.32391	3.79029	0.33105	4.14569	0.35708	3.78752	0.24754	4.00838
2	adult	0.2063	3.89286	0.26329	3.74676	0.19429	3.89284	0.29439	3.84862	0.30127	3.95536	0.37693	3.48143	0.20423	4.05319
2	adult	3.93386	0.55603	4.17678	0.60154	4.15716	0.60058	3.77961	0.54585	3.33909	0.45541	3.95722	0.56213	4.02279	0.49801
2	adult	3.81912	0.50602	3.97833	0.56073	3.8168	0.56832	3.97646	0.54366	4.09036	0.55013	3.74474	0.5619	3.83705	0.49205
2	adult	0.31389	0.47464	0.32287	0.48786	0.41291	0.48395	3.15402	0.51294	4.12379	0.5223	0.31648	0.54122	0.50125	0.4864
2	adult	3.8738	0.49869	4.04587	0.50801	3.97775	0.55197	3.77737	0.53367	4.08508	0.51979	3.99619	0.57406	3.74455	0.53136
2	adult	0.28263	3.17829	0.32344	3.4538	0.27783	3.61427	0.29962	3.5106	0.37011	3.34792	0.36588	3.21127	0.28674	3.33176
2	adult	3.56544	0.49381	3.94706	0.52738	3.82145	0.52336	3.67104	0.50041	3.94265	0.53774	3.6654	0.62389	3.5165	0.57881
2	adult	3.82731	0.55262	3.91433	0.58671	3.82239	0.69687	3.75694	0.78376	4.1704	0.55559	3.92323	0.6266	3.96933	0.52981
2	adult	0.19978	3.7408	0.31026	3.91328	0.27904	3.74168	0.27535	3.85296	0.29608	3.72662	0.37514	3.59653	0.21577	4.03595
2	adult	4.00203	0.49455	4.12863	0.54201	3.98127	0.53894	3.82685	0.49899	4.01582	0.53095	3.94769	0.55412	3.95023	0.51475
2	adult	3.78591	0.47097	4.21856	0.54108	4.07739	0.51643	3.65153	0.53158	4.1231	0.53351	3.8313	0.54846	3.62571	0.50775
2	adult	3.43572	0.461	4.12012	0.5183	3.91853	0.49778	3.4074	0.52928	4.31467	0.43429	3.78634	0.55817	3.48407	0.46983
2	adult	3.78006	0.51969	4.01612	0.52794	4.17818	0.58409	3.68404	0.598	4.23981	0.49506	3.72639	0.57395	3.67804	0.47839
2	adult	0.21489	3.70689	0.45633	3.82376	0.23438	3.88473	0.42636	3.76814	0.35283	3.66523	0.46977	3.66683	0.24076	3.73196
2	adult	0.21499	3.8337	0.25181	4.09979	0.20139	3.96083	0.39544	3.76193	0.33153	3.86253	0.41189	3.97816	0.27096	4.01968
2	adult	0.19897	3.81988	0.26961	3.88388	0.1885	3.79169	0.32391	3.83922	0.30621	3.93251	0.40318	3.77685	0.20625	3.92344
2	adult	0.21	3.82358	0.24115	4.02998	0.18932	4.08973	0.28502	4.02379	0.26434	3.88014	0.29808	3.74994	0.22906	3.87647
2	adult	3.78223	0.4621	4.05047	0.54026	4.1705	0.55462	3.79002	0.52035	4.31977	0.54029	4.11656	0.58303	3.97419	0.56565
2	adult	3.79892	0.4964	4.12895	0.54011	3.99524	0.54672	3.80675	0.55031	4.0934	0.48948	3.97983	0.57379	3.86469	0.52998
2	adult	4.11025	0.55475	4.2164	0.58423	4.21253	0.58829	3.78071	0.56629	4.14676	0.48463	3.79952	0.53491	3.79665	0.4552
2	adult	4.00819	0.52974	4.20242	0.5458	4.11997	0.56018	3.93291	0.52168	4.30791	0.53701	3.87586	0.5912	3.71267	0.52765
2	adult	3.81032	0.58036	4.08416	0.63103	3.85994	0.89283	3.94086	0.65543	4.12522	0.50337	3.86334	0.58267	3.8965	0.49762
2	adult	0.26998	3.94457	0.26777	3.80973	0.19189	3.85803	0.37285	3.82307	0.37873	4.07397	0.48274	3.67335	0.20778	3.9048
2	adult	0.2049	3.72766	0.26851	4.03366	0.20106	3.89274	0.31094	3.8122	0.27905	3.82974	0.39008	3.7277	0.19486	3.87439
2	adult	0.2104	3.95003	0.24897	4.0729	0.19968	4.18782	0.2799	3.82957	0.2561	3.88685	0.33128	3.8524	0.19996	3.97503
2	adult	3.93503	0.53724	4.10743	0.59252	3.9603	0.61275	4.00812	0.56462	4.13218	0.53141	3.88106	0.55532	3.82847	0.49143
2	adult	4.01033	0.58128	4.17688	0.54905	3.92181	0.57404	3.84179	0.6358	4.10379	0.55573	3.87007	0.56498	3.84431	0.51781
2	adult	3.84305	0.49915	4.19518	0.53569	4.01424	0.51354	3.55667	0.55232	4.15748	0.46894	3.997	0.57132	3.71896	0.53626
2	adult	3.83888	0.52347	4.21723	0.58205	4.03187	0.57062	3.96822	0.68132	4.2981	0.52943	4.03631	0.56018	3.87864	0.48719
2	adult	2.8203	1.91309	3.15927	2.10475	2.93047	2.06693	2.54605	2.65226	3.25902	1.85301	2.67001	2.06443	2.44126	1.97611
2	adult	0.26011	3.88316	0.25768	3.83605	0.21216	3.97575	0.33084	3.75312	0.38446	3.98496	0.40401	3.87124	0.22776	3.97077
2	adult	0.2136	3.72123	0.27837	4.03813	0.20344	3.98173	0.29708	3.99996	0.29504	3.88287	0.35124	4.12454	0.2092	3.77005
2	adult	0.20755	3.9345	0.26916	3.96054	0.18299	3.88934	0.26969	3.8214	0.285	3.99169	0.39058	3.89987	0.20183	3.94908
2	adult	4.08641	0.54098	4.15916	0.53226	4.14898	0.56839	3.88808	0.54039	4.11508	0.50686	4.2137	0.64667	3.76845	0.48575
2	adult	4.03725	0.54856	4.0372	0.56062	3.93187	0.57932	3.91325	0.55311	4.24354	0.52996	3.82886	0.57226	3.87867	0.55921
2	adult	3.9575	0.5155	4.26034	0.56867	4.12534	0.53952	3.82396	0.67107	4.21326	0.53499	4.017	0.57692	3.81674	0.52025
2	adult	3.99423	0.54084	4.001	0.53868	4.10535	0.63298	3.87824	0.6846	4.35321	0.5321	4.03533	0.57988	3.90943	0.51068
2	adult	0.82311	3.4324	1.11372	3.55072	1.05123	3.63953	1.00674	3.32883	1.10419	3.41563	0.81554	3.34499	0.76332	3.56911
2	adult	0.21898	3.82269	0.30182	3.81291	0.19228	3.79995	0.44887	3.85457	0.35092	3.84145	0.47939	4.04426	0.23352	3.9124
2	adult	0.2186	3.80373	0.27239	3.94764	0.1983	4.01847	0.43137	3.77206	0.33147	3.84788	0.37739	3.82522	0.22328	3.98771
2	adult	0.22089	3.99508	0.27894	4.02428	0.19581	3.86073	0.2972	3.78371	0.29717	4.11224	0.28179	3.79926	0.23675	4.11793
2	adult	3.86705	0.50746	4.2671	0.61009	3.92973	0.52626	3.87248	0.55145	4.15214	0.51555	3.81765	0.59033	3.99259	0.50618
2	adult	4.11079	0.53749	4.06988	0.56352	3.87979	0.56085	4.05924	0.60857	4.36969	0.55308	3.9543	0.59854	3.78943	0.48665
2	adult	3.83291	0.52082	4.1521	0.57463	3.98228	0.5831	3.96791	0.65486	4.14816	0.53127	3.94911	0.65301	3.80549	0.47579
2	adult	4.06108	0.50539	4.13454	0.50413	4.01451	0.55099	3.92459	0.54401	4.09896	0.48735	3.8448	0.61967	3.918	0.49748
2	adult	0.35101	3.50597	0.50987	3.80686	0.4488	3.76442	0.60976	0.50317	0.52406	3.64742	0.62045	3.56971	0.27815	3.74912
2	adult	3.9047	0.87689	3.86147	0.83901	3.92934	1.1407	3.79257	1.00144	4.18715	0.7654	3.85942	0.74129	3.61004	0.79981
2	adult	3.97864	0.62365	4.22472	0.71285	3.94581	0.78952	4.16612	0.64315	4.15681	0.57484	4.05114	0.64307	3.85765	0.52416
2	adult	2.58679	2.23356	2.8716	2.33959	2.70538	2.40866	2.52267	2.76881	3.04749	2.06475	2.45163	2.45577	2.40515	2.37457
2	adult	0.20496	3.92036	0.31567	4.06311	0.17612	3.86358	0.47265	3.90443	0.30186	3.94615	0.49359	3.98019	0.20093	3.95973
2	adult	3.9234	0.51281	4.13588	0.55664	4.13253	0.56227	3.79852	0.51242	4.20855	0.51285	3.9521	0.56657	4.00028	0.44725
2	adult	3.52327	0.47131	3.90547	0.51522	3.83384	0.49486	3.80875	0.55085	4.06498	0.46302	3.6801	0.53164	3.4597	0.41968
2	adult	3.9644	0.50405	4.21828	0.55369	4.27268	0.60589	4.05191	0.57121	4.20998	0.52752	4.05158	0.5887	3.94803	0.49856
2	adult	3.83378	0.50915	4.00213	0.55275	3.97819	0.53675	3.94006	0.50478	4.16414	0.53333	3.79092	0.62939	3.73766	0.42281
2	adult	3.74617	0.7394	4.05228	0.76452	3.75297	1.07017	4.06498	0.89153	3.92439	0.61997	3.87928	0.73778	4.12356	0.72436
2	adult	0.23066	3.88797	0.32855	3.79897	0.26414	3.99434	0.49587	3.81989	0.35658	3.96287	0.55455	3.78741	0.20999	4.0662
2	adult	3.85202	0.75925	4.08892	0.71693	4.02111	0.83105	3.63748	1.13928	4.1047	0.60815	3.92592	0.75347	4.02929	0.5664
2	adult	4.03201	0.56579	4.23603	0.61104	4.20519	0.6726	3.99213	0.55464	4.27551	0.58387	4.05139	0.64147	4.06124	0.49469
2	adult	4.02182	0.54495	4.03779	0.60943	4.11308	0.62272	4.07244	0.5998	4.26757	0.55242	3.94184	0.55413	4.10139	0.47825
2	adult	3.67813	0.51328	4.06773	0.63629	4.10385	0.61901	4.12474	0.59148	3.92791	0.50012	3.92111	0.59412	3.95433	0.50949
2	adult	3.41901	0.48435	3.66267	0.56836	3.64326	0.51711	3.53018	0.53287	3.67938	0.50297	3.47272	0.53368	3.41788	0.47425
2	adult	0.55413	0.45784	3.47776	0.4472	3.87716	0.43134	3.15137	0.52371	4.20951	0.54438	3.13135	0.49495	3.62969	0.4448
2	adult	0.29671	3.88333	0.50668	3.71077	0.2743	3.78484	0.59057	3.67894	0.58071	3.87086	0.81052	3.50943	0.25691	3.91487
2	adult	0.20677	3.80961	0.32426	3.90211	0.25335	3.82309	0.46007	3.82898	0.38926	3.64054	0.55975	3.8281	0.21692	4.03449
2	adult	0.2062	3.7096	0.27644	3.88355	0.19026	3.87235	0.37878	3.71447	0.35419	3.72496	0.50359	3.76206	0.21819	4.07373
2	adult	4.02911	0.5894	4.02433	0.65252	3.84376	0.76006	3.95861	0.55494	4.23487	0.53988	4.08321	0.76882	3.93259	0.54753
2	adult	3.85285	0.54016	4.06478	0.54919	4.12267	0.6413	3.89269	0.51836	4.28502	0.54388	3.85847	0.55983	3.88622	0.54604
2	adult	3.82844	0.49168	4.08417	0.53712	3.87491	0.5312	3.80589	0.52991	4.25333	0.5321	3.9218	0.57067	3.86547	0.50366
2	adult	3.58807	0.66631	4.0434	0.65538	3.8558	0.77077	3.83728	0.57251	4.09909	0.56063	3.67625	0.61319	3.88306	0.51209
2	adult	3.20595	0.46285	3.84956	0.47173	4.14542	0.48555	3.30786	0.49448	3.96295	0.47521	3.55997	0.55049	3.51859	0.40842
2	adult	0.39723	3.90785	0.49472	3.88122	0.31657	3.80856	0.64518	3.8417	0.47663	3.79055	0.76291	3.60774	0.25889	3.82748
2	adult	0.38158	3.8463	0.57044	3.52221	0.53125	3.69378	0.53111	3.68489	0.82907	3.65805	0.54987	3.43383	0.2563	3.73161
2	adult	1.96339	2.83074	2.395	2.81246	2.36765	2.97137	1.95109	3.02815	2.43989	2.51873	1.86939	2.68525	1.7539	2.86811
2	adult	3.92714	0.54946	3.97593	0.56543	4.01331	0.57398	3.88015	0.51957	4.21833	0.56493	3.92867	0.58423	4.0117	0.53541
2	adult	3.65591	0.51053	3.88977	0.49488	3.82879	0.52461	3.60915	0.4994	3.89162	0.4769	3.77858	0.52166	3.5849	0.47983
2	adult	3.97293	0.56808	4.13828	0.60509	4.04941	0.65383	3.93442	0.55934	4.22992	0.53845	3.82216	0.52032	4.02357	0.51502
2	adult	4.07802	0.56396	4.07246	0.60321	4.09257	0.7097	3.97016	0.56765	4.09619	0.5285	3.96434	0.70895	3.81411	0.44895
2	adult	4.00181	0.54433	4.21434	0.65065	4.09768	0.75411	4.2608	0.59888	4.38058	0.57936	4.08433	0.60532	3.90462	0.53573
2	adult	0.51509	3.64843	0.55523	3.77913	0.52418	3.6631	0.64048	3.66624	0.64187	3.74615	0.81758	3.38504	0.38779	4.1686
2	adult	3.8224	0.67479	3.84527	0.63151	3.66795	0.74245	3.85939	0.54879	4.0287	0.58966	3.82338	0.65858	3.99055	0.59396
2	adult	3.67646	0.6555	4.08747	0.67531	3.73077	0.74845	3.99962	0.59174	3.99611	0.54782	3.76936	0.59902	3.91507	0.50363
2	adult	3.90986	0.50651	4.08455	0.60318	4.16298	0.5547	3.64753	0.50552	4.1474	0.48997	3.9177	0.57519	4.19315	0.55427
2	adult	3.85928	0.52213	4.0704	0.56558	4.234	0.58124	3.92911	0.54269	4.12608	0.48564	4.15655	0.61251	3.77085	0.49399
2	adult	3.98224	0.52205	4.11852	0.53944	4.1007	0.57494	3.85923	0.56496	4.07459	0.50132	3.92388	0.54374	4.0848	0.48839
2	adult	3.86499	0.58714	4.06283	0.60437	4.08677	0.74863	3.8934	0.53164	4.20394	0.51347	3.97662	0.51707	3.86681	0.49418
2	adult	3.41712	0.5724	3.98216	0.58766	3.82387	0.59938	3.36438	0.43799	3.98364	0.5057	3.33294	0.6019	3.61754	0.50099
2	adult	3.79178	0.68431	3.98626	0.69311	3.72758	0.9505	3.60658	1.10444	3.98232	0.63523	3.68964	0.69275	3.91365	0.68163
2	adult	0.20737	3.9132	0.32085	3.81338	0.19513	3.93528	0.34584	3.79041	0.31218	3.81637	0.46216	3.76232	0.21098	3.83641
2	adult	0.25082	3.89099	0.30807	3.85447	0.22039	3.84913	0.33713	3.89979	0.44455	3.84995	0.43121	3.6509	0.27443	3.99814
2	adult	3.93138	0.51968	4.07545	0.53713	4.16856	0.57172	3.89066	0.50009	4.19334	0.48444	4.0706	0.58004	3.93627	0.51553
2	adult	3.72981	0.51649	4.17236	0.60784	4.09684	0.58457	3.95629	0.5408	4.29205	0.5375	3.97132	0.54259	3.88122	0.48623
2	adult	4.10357	0.49627	4.14165	0.57202	3.99897	0.50809	3.60499	0.53923	4.20069	0.50846	4.03412	0.62495	3.83212	0.47358
2	adult	2.90023	0.42351	3.72655	0.47722	3.90576	0.46223	3.14279	0.4767	4.1982	0.51963	3.87038	0.52561	3.47204	0.46031
2	adult	3.76479	0.71018	4.12409	0.65157	3.79203	0.76563	4.04147	0.54838	4.37119	0.55559	4.02639	0.66963	3.92744	0.49711
2	adult	0.26192	3.75334	0.35854	3.7816	0.27211	3.84434	0.43932	3.67844	0.37016	4.10893	0.51832	3.61579	0.28165	3.92121
2	adult	3.79071	0.65438	4.01748	0.60402	3.82935	0.78198	3.84938	0.82968	3.99325	0.53329	3.72552	0.71622	3.77072	0.51511
2	adult	3.81498	0.62277	4.09803	0.65037	3.89154	0.77265	3.8721	0.63146	4.05366	0.52787	3.83218	0.60612	3.91196	0.56056
2	adult	4.11995	0.5419	4.17889	0.56278	4.06224	0.51959	3.7613	0.51735	4.26809	0.53965	4.10875	0.49829	3.779	0.46237
2	adult	3.97351	0.50729	4.20305	0.5401	3.98733	0.56584	3.69464	0.5469	4.15942	0.50671	4.08501	0.53468	3.86539	0.5056
2	adult	3.89975	0.45451	4.33989	0.55926	4.20858	0.52879	4.00892	0.54073	4.16481	0.52062	4.08926	0.53498	4.04052	0.52269
2	adult	3.50893	0.43454	3.92417	0.49313	3.83144	0.46855	3.64138	0.53688	4.11265	0.5216	3.93585	0.55272	3.48724	0.4702
2	adult	3.85224	0.56749	4.09603	0.59363	4.00601	0.63849	4.06903	0.6434	4.12687	0.49031	3.8902	0.64341	3.97005	0.55389
2	adult	0.24002	3.83174	0.30414	3.80205	0.1966	3.76119	0.41217	3.87883	0.40373	3.80751	0.49333	3.58554	0.2092	3.88318
2	adult	0.21582	4.01347	0.26294	3.79138	0.2138	3.87065	0.35513	3.70429	0.29373	3.77422	0.47853	3.66326	0.2283	3.82831
2	adult	4.0097	0.61519	4.17678	0.63654	3.8933	0.74207	3.91842	0.53551	4.0131	0.5302	4.01374	0.66491	3.94392	0.53466
2	adult	3.86715	0.51843	4.30297	0.57285	3.99365	0.54595	3.87954	0.49508	4.27503	0.54797	3.93602	0.54206	4.09625	0.57128
2	adult	3.92195	0.54448	4.11811	0.52395	4.06275	0.52637	3.87867	0.49729	4.22671	0.48716	4.05395	0.59873	4.03794	0.53386
2	adult	3.95281	0.53089	4.26236	0.60869	3.89523	0.68735	3.88795	0.55275	4.16596	0.48073	3.89368	0.55149	3.94383	0.56079
2	adult	3.863	0.48258	4.43565	0.59249	4.06396	0.51279	3.68126	0.54936	4.24306	0.48282	3.88112	0.5531	3.9218	0.51191
2	adult	3.89208	0.48171	4.12382	0.52835	4.03668	0.56001	4.00729	0.51451	4.17938	0.47942	3.97199	0.64096	3.96018	0.4752
2	adult	3.90461	0.63305	3.92924	0.61072	3.86327	0.8382	3.78487	0.84916	4.12005	0.60152	3.88262	0.70917	3.8456	0.49553
2	adult	0.19915	3.88966	0.28904	3.8508	0.18147	3.87448	0.38462	3.96659	0.30014	3.65703	0.44443	3.59218	0.19052	3.89756
2	adult	0.19895	3.78227	0.3121	3.83297	0.17347	3.86138	0.37836	3.80144	0.28233	3.92643	0.39251	3.69827	0.2211	3.85907
2	adult	3.87302	0.58533	4.2448	0.6771	4.11263	0.75795	4.03842	0.55765	4.17802	0.53956	3.99273	0.66691	3.94928	0.55282
2	adult	4.10711	0.60909	4.2072	0.56579	4.18322	0.71346	3.89435	0.52099	4.1554	0.51939	4.1634	0.55914	3.9718	0.47175
2	adult	4.02213	0.45702	4.05142	0.53469	4.17507	0.55387	3.98914	0.50026	0.32339	0.48422	4.14069	0.5779	4.13132	0.56429
2	adult	2.74728	0.48988	3.7218	0.50054	3.64367	0.44798	2.97039	0.47815	3.83545	0.48655	3.48402	0.53303	3.16842	0.48236
2	adult	3.12514	0.54786	4.0219	0.61148	3.4973	0.47774	3.3779	0.48992	4.03226	0.44037	3.66559	0.56529	3.39996	0.43226
2	adult	4.00807	0.69429	4.00698	0.6288	3.76788	0.85608	3.94216	0.55964	4.02951	0.60368	3.77514	0.65122	3.98211	0.5768
2	adult	0.2182	3.88371	0.26259	3.98481	0.20028	4.01943	0.35878	3.88352	0.31867	3.87327	0.41995	3.75365	0.1972	4.02528
2	adult	3.87957	0.6077	4.13532	0.63157	4.05742	0.75285	3.86879	0.53459	4.02565	0.50416	3.96382	0.67632	4.00852	0.50472
2	adult	3.89481	0.5082	4.16057	0.56252	4.16439	0.5792	4.04574	0.56011	4.23067	0.52023	4.02205	0.57396	3.88202	0.46386
2	adult	3.74967	0.49394	3.98204	0.58105	3.82465	0.53189	3.84033	0.54073	3.86416	0.48047	4.04896	0.6193	3.67335	0.46217
2	adult	4.0782	0.48632	4.20083	0.58583	4.10081	0.5861	3.91649	0.59458	4.2306	0.50143	4.14305	0.58672	4.22271	0.53092
2	adult	4.19753	0.62192	4.33606	0.57982	4.1182	0.69027	4.05807	0.54214	4.19978	0.52075	3.97465	0.58013	3.89991	0.49701
2	adult	3.88762	0.55109	4.1334	0.61329	4.19267	0.72588	3.94344	0.50091	4.28458	0.51197	3.93893	0.57942	3.85659	0.44245
2	adult	0.39045	3.64373	0.38332	3.72051	0.31796	3.92859	0.65156	3.72794	0.66928	3.77593	0.62539	3.81171	0.29088	3.91967
2	adult	0.28108	3.88642	0.35827	3.69546	0.39291	3.88859	0.59876	3.66472	0.44306	3.93793	0.51011	3.55156	0.25511	3.73763
2	adult	0.18233	3.82734	0.25795	3.70676	0.16446	3.72222	0.33931	3.84258	0.37067	3.90975	0.45872	3.66549	0.20437	3.84234
2	adult	3.71332	0.61852	4.10258	0.63537	3.85737	0.75219	3.93241	0.52694	3.95783	0.53702	3.77153	0.60457	4.0568	0.5252
2	adult	3.69228	0.48866	4.0828	0.57528	3.8375	0.53447	3.84533	0.50371	4.17994	0.48175	3.96965	0.58852	3.88997	0.48711
2	adult	3.94163	0.6138	4.14505	0.62999	3.91306	0.71948	4.03608	0.53148	4.31475	0.59089	4.07308	0.66038	4.17745	0.50853
2	adult	2.55212	2.25318	3.15248	2.25224	2.96648	1.93961	2.29154	2.6711	3.21713	1.70668	2.5343	2.23007	2.56726	2.02165
2	adult	3.86362	0.50721	4.19712	0.60488	4.05946	0.67356	4.02591	0.73049	4.14563	0.46741	3.95751	0.57903	4.00937	0.48096
2	adult	0.22897	3.85063	0.45985	3.80391	0.27458	3.79429	0.53653	3.85149	0.46154	3.73482	0.61882	3.51982	0.2506	3.97195
2	adult	0.22901	3.91347	0.38398	3.72498	0.20249	3.88149	0.51957	3.86411	0.39168	3.80109	0.63859	3.69021	0.23521	3.87477
2	adult	3.8963	0.65378	4.1612	0.75693	3.89523	0.91406	4.00019	0.76789	4.04064	0.62426	4.01363	0.70238	3.99059	0.58928
2	adult	3.96191	0.5182	4.0713	0.59097	4.03886	0.7185	4.10425	0.61222	4.3589	0.56476	4.04782	0.65352	4.17886	0.52414
2	adult	4.14492	0.5639	4.08437	0.59909	4.13108	0.73933	4.03897	0.55304	4.20216	0.56072	4.00166	0.66391	3.91826	0.47374
2	adult	3.93693	0.49255	4.13317	0.57007	4.23136	0.60627	3.92526	0.55303	4.09668	0.5601	3.8147	0.63223	3.93148	0.49808
2	adult	3.24683	0.48658	3.93009	0.51134	3.97122	0.50108	3.43424	0.53727	4.16746	0.55051	3.62434	0.67671	3.59391	0.51922
2	adult	3.74298	0.6282	4.20601	0.72139	4.06281	0.83537	3.68399	1.24595	4.02436	0.59228	3.73513	0.76684	3.82098	0.59384
2	adult	3.74276	0.87368	3.79408	0.90094	3.61264	1.26081	3.86732	0.95367	4.12231	0.67581	3.79668	0.7717	3.99204	0.6095
2	adult	3.86374	0.66616	4.08298	0.6726	3.93648	0.85412	3.97461	0.621	4.30327	0.55215	3.88601	0.61136	3.97579	0.53661
2	adult	0.28807	3.76355	0.43592	3.75964	0.2355	3.89087	0.5257	3.78014	0.4134	3.72149	0.5306	3.5518	0.26185	3.63475
2	adult	0.20437	4.06126	0.2765	3.88918	0.17571	3.91229	0.42423	4.01935	0.3001	3.84975	0.41012	3.72655	0.2286	4.0918
2	adult	0.2057	3.92508	0.31999	3.99052	0.18038	3.98341	0.40615	3.70069	0.31245	3.88087	0.47429	3.59739	0.22431	3.98987
2	adult	0.44717	0.5748	0.45823	0.59969	0.42206	0.55797	0.44107	0.65065	0.42955	0.57041	0.48512	0.6394	0.43825	0.61273
2	adult	0.21938	3.72061	0.3122	3.75378	0.20587	4.01491	0.33733	3.93934	0.33846	3.95077	0.30053	3.67955	0.24104	3.77381
2	adult	3.8285	0.81714	3.94362	0.8191	3.70488	1.16823	3.91925	0.72108	4.05637	0.68351	3.82402	0.73572	3.86863	0.58555
2	adult	3.96688	0.54485	3.99567	0.61819	3.96443	0.70245	4.01216	0.56202	4.02858	0.58182	3.98959	0.8337	4.11348	0.5173
2	adult	3.84413	0.67962	4.03146	0.63978	3.86677	0.81243	3.96518	0.63418	4.12249	0.55299	3.78855	0.69234	4.04791	0.57258
2	adult	0.21201	3.76559	0.29092	4.00191	0.17342	3.94856	0.35066	3.79524	0.34446	3.97593	0.49688	3.79773	0.18711	3.92746
2	adult	0.17875	3.66049	0.20675	3.88207	0.15835	3.68957	0.44149	3.20577	0.3174	3.83064	0.27359	3.2765	0.78095	2.89118
2	adult	0.19463	3.73954	0.23116	3.72945	0.1526	3.74232	0.21875	3.7292	0.27626	3.79371	0.35342	3.81731	0.19654	3.83498
2	adult	3.85281	0.52248	4.11636	0.61491	4.06032	0.55852	3.52353	0.69117	4.09405	0.56515	3.83488	0.63805	3.67637	0.47697
2	adult	3.9404	0.75922	3.8521	0.76319	3.78677	1.09195	3.89702	0.71502	4.11141	0.78398	3.91046	0.90993	3.92304	0.59103
2	adult	3.99211	0.73221	4.02934	0.66217	3.84973	0.91827	3.92329	0.57811	4.00403	0.55253	3.81358	0.74529	4.05442	0.56022
2	adult	3.88651	0.50754	4.17259	0.57714	4.01397	0.62595	3.83884	0.61915	4.08242	0.57175	3.8845	0.58107	3.95902	0.48592
2	adult	0.4323	3.72974	0.22911	3.92347	0.1649	3.88775	0.24983	3.97751	1.03138	3.58512	0.54383	3.61198	0.18507	3.8636
2	adult	0.19501	4.06292	0.24767	3.97697	0.17783	3.90638	0.32541	3.83802	0.24742	3.85731	0.26422	3.96723	0.23244	4.09734
2	adult	0.40586	0.64159	0.33494	2.75406	0.30812	3.24768	0.29025	2.71734	0.30775	3.54758	0.34325	2.46247	0.32926	3.09147
2	adult	0.22344	3.67742	0.30783	3.69972	0.2279	3.92848	0.29089	3.80156	0.30641	3.82432	0.28571	3.86247	0.22867	4.0287
2	adult	3.86364	0.71451	3.82591	0.71926	3.75311	0.93323	3.82906	0.71205	4.00839	0.65034	3.72768	0.68734	4.06671	0.55208
2	adult	3.82501	0.68297	3.97079	0.65633	3.80882	0.84423	3.84429	0.65177	4.08294	0.55375	3.81479	0.79006	4.1123	0.56225
2	adult	3.96137	0.58619	4.01554	0.58053	3.85089	0.60406	3.86484	0.6584	4.01089	0.55175	3.84427	0.57561	3.93207	0.52912
2	adult	0.19312	3.95956	0.27097	3.85633	0.24936	3.87285	0.35639	3.88407	0.35386	3.96823	0.48145	3.77949	0.20577	3.70586
2	adult	0.53247	0.44254	0.49926	0.41384	0.50302	0.39311	0.4344	0.39389	0.48364	0.36363	0.50687	0.40863	0.49587	0.35866
2	adult	0.19641	3.63827	0.21908	3.87244	0.1908	3.72869	0.37494	3.48068	0.2938	3.72486	0.54651	3.5275	0.18562	3.62393
2	adult	0.36056	3.23194	0.40142	3.39884	0.35826	3.2589	0.36569	3.27195	0.38983	3.3271	0.38822	3.23318	0.36449	3.41563
2	adult	3.95527	0.71808	4.23894	0.77424	3.81634	1.02081	3.8906	0.86895	3.99439	0.70275	3.75302	0.73858	3.87627	0.58536
2	adult	3.97741	0.58976	4.03576	0.64959	3.84337	0.78875	3.96051	0.64509	3.98845	0.52522	3.91933	0.66143	3.86149	0.55106
2	adult	3.65196	0.69185	3.87839	0.63757	3.75919	0.79532	3.33035	0.994	4.02463	0.58177	3.66127	0.53029	3.84527	0.56146
2	adult	0.25512	3.5327	0.21214	3.86093	0.21458	3.76285	0.2302	3.95424	0.24309	3.82663	0.27903	3.76529	0.21103	3.87212
2	adult	0.19374	3.65986	0.21453	3.95549	0.17842	3.99743	0.20321	3.82132	0.25608	3.87022	0.32111	3.76789	0.17183	3.7173
2	adult	0.21012	3.568	0.28553	3.96853	0.2082	3.77361	0.30103	3.86646	0.31058	3.89833	0.31608	3.3789	0.22046	3.73684
2	adult	0.33857	3.1695	0.35546	3.38738	0.31338	3.52322	0.33041	3.57166	0.41625	3.64535	0.3411	3.66961	0.40492	3.39762
2	adult	3.96237	0.63957	3.96546	0.6976	3.79854	1.07468	3.93569	0.68871	4.02349	0.62912	4.00112	0.75054	3.9917	0.58917
2	adult	3.70807	0.64743	3.91219	0.67254	3.80531	0.80094	3.77414	0.57012	3.90078	0.62953	3.74765	0.61501	3.90827	0.49292
2	adult	3.65348	0.4575	4.05062	0.58935	4.0572	0.61766	3.74967	0.67321	4.22409	0.52363	3.88798	0.57431	4.0275	0.48759
2	adult	0.22813	3.85065	0.23187	3.8912	0.1932	3.9038	0.29681	3.75644	0.30137	3.65951	0.42853	3.57811	0.19492	3.82397
2	adult	0.63811	0.41196	0.58327	0.38681	0.59128	0.35843	0.56072	0.3772	0.58536	0.34837	0.53438	0.41401	0.63619	0.38905
2	adult	0.62441	2.71471	0.43751	3.12489	0.36579	3.14928	0.40641	3.15756	0.46782	3.25698	0.43006	3.31123	0.41126	3.11998
2	adult	0.22395	3.46358	0.27569	3.79946	0.25029	3.83111	0.27213	3.8156	0.30279	3.60132	0.28484	3.57311	0.23017	3.49437
2	adult	3.82488	0.59646	3.98073	0.6888	3.80521	0.87279	3.96815	0.63031	4.23538	0.6362	3.87072	0.662	3.68515	0.47181
2	adult	3.85307	0.67661	4.17711	0.63361	3.78778	0.78243	3.80883	0.59317	4.07156	0.49406	3.93075	0.71671	3.89046	0.53454
2	adult	3.74466	0.61294	3.98282	0.6116	3.91752	0.81109	3.90119	0.54002	4.24638	0.59685	3.81457	0.68187	3.97531	0.59355
2	adult	0.20022	3.9556	0.26459	4.08241	0.17904	3.9662	0.27513	3.98661	0.26487	4.05979	0.32893	3.61424	0.21897	3.98429
2	adult	0.19573	3.69779	0.2153	3.99576	0.17367	3.8595	0.24318	3.81482	0.26206	3.84841	0.32049	3.54707	0.19419	3.64935
2	adult	0.35133	3.34982	0.36515	3.46046	0.28929	3.41294	0.33644	3.40789	0.35792	3.42539	0.36531	3.51569	0.30847	3.4487
2	adult	0.26538	3.7336	0.30036	3.55238	0.2653	3.87204	0.29192	3.60316	0.32025	3.79911	0.31848	3.72156	0.27996	3.53712
2	adult	4.02978	0.61476	4.02441	0.68344	3.84557	0.75967	4.03949	0.62812	4.0363	0.58914	4.11919	0.73108	3.93346	0.55841
2	adult	3.82176	0.57704	4.02999	0.60327	3.89976	0.76109	3.94526	0.56013	3.88966	0.49488	3.71755	0.54645	3.94749	0.4932
2	adult	0.17493	3.71698	0.23861	4.00453	0.19127	3.91872	0.26962	4.04873	0.27209	4.12077	0.28612	3.61042	0.20275	3.72851
2	adult	0.24044	3.92617	0.25514	3.67279	0.2491	3.79083	0.25511	4.01071	0.30466	3.8679	0.33522	3.60914	0.24466	3.81186
2	adult	0.22799	3.97538	0.24076	3.97509	0.2296	3.83046	0.25244	3.63468	0.28541	3.76754	0.27647	3.55298	0.20173	3.91592
2	adult	0.19887	3.66636	0.26152	3.75153	0.18409	3.64691	0.25993	3.87079	0.25354	3.77372	0.28054	3.90859	0.20181	3.85876
2	adult	0.41183	2.91381	0.41683	3.30483	0.37683	3.49931	0.40462	3.42192	0.47133	3.42349	0.40492	3.46938	0.5072	2.71538
2	adult	4.03338	0.67079	4.15674	0.71012	4.09494	0.98761	4.16718	0.683	4.04368	0.56289	3.93475	0.6682	3.74914	0.5148
2	adult	3.8603	0.62588	4.00407	0.58934	3.85623	0.78811	4.10552	0.56748	4.2352	0.52306	3.99001	0.64378	4.01179	0.55877
2	adult	0.18148	3.7627	0.21796	3.75412	0.17972	4.01474	0.36789	3.76317	0.33216	3.91065	0.38027	3.76647	0.17326	3.81133
2	adult	0.38685	0.96662	0.29246	3.5342	0.28538	3.75468	0.26783	3.70308	0.35182	3.65996	0.35565	3.20807	0.37843	3.3626
2	adult	0.1916	3.78653	0.23257	3.98299	0.17005	3.9663	0.31774	3.97493	0.29479	4.01478	0.35134	3.81886	0.1856	4.02501
2	adult	0.21787	3.92662	0.22837	3.94301	0.20972	3.79313	0.26092	3.92226	0.24324	4.02618	0.24721	3.65847	0.2049	3.78142
2	adult	0.31121	1.53209	0.24086	3.4735	0.20832	3.55726	0.2278	3.74914	0.25251	3.77051	0.28797	3.63528	0.24109	3.41759
2	adult	3.77687	0.72593	4.10782	0.74236	3.81977	0.91875	3.86958	0.57607	4.13151	0.65218	3.81185	0.66638	3.96431	0.55176
2	adult	4.01095	0.57652	3.95142	0.57152	4.03629	0.73719	3.96659	0.68687	4.24796	0.58328	3.93791	0.63457	3.80492	0.50506
2	adult	0.18822	3.82127	0.21543	4.01134	0.17445	3.83779	0.28939	3.82452	0.24241	3.75847	0.25251	3.81793	0.19981	3.92907
2	adult	0.21234	3.66287	0.23376	3.79744	0.19688	4.03016	0.24897	3.97221	0.2827	3.79241	0.33478	3.53339	0.22479	4.00374
2	adult	0.45017	0.36232	0.45467	0.44924	0.44684	0.38835	0.41605	0.44612	0.41118	0.35721	0.40754	0.44362	0.42904	0.40568
2	adult	0.23475	3.79957	0.26145	3.87873	0.22967	3.82365	0.29275	3.74901	0.29518	3.78666	0.30315	3.83237	0.27926	3.9851
2	adult	0.20528	3.76976	0.26744	3.74117	0.19831	3.89495	0.26691	3.91907	0.2863	3.95719	0.27709	3.93838	0.23592	3.84229
2	adult	3.91367	0.69947	4.00253	0.63969	3.90094	0.91828	3.91184	0.63864	4.09693	0.64122	3.9413	0.67049	4.09071	0.55858
2	adult	3.90388	0.59469	4.02584	0.61155	3.91971	0.75421	4.09971	0.63959	4.20343	0.56543	3.70462	0.6543	4.06425	0.47469
2	adult	0.19297	3.89617	0.24207	4.07331	0.16765	3.85158	0.29545	3.91155	0.30877	4.35683	0.33876	3.80943	0.21689	4.0351
2	adult	0.185	3.78041	0.28539	3.94015	0.2818	3.83785	0.30303	3.82032	0.43025	3.94946	0.39374	3.84876	0.19119	3.82067
2	adult	0.2897	0.62289	0.28451	0.65503	0.28031	0.60812	0.29908	0.64696	0.27052	0.65862	0.33191	0.67915	0.27469	0.59685
2	adult	0.2162	3.6006	0.2681	3.77887	0.199	3.95113	0.28766	3.88608	0.26539	3.93449	0.28323	3.87938	0.35982	3.44342
2	adult	0.2247	3.67595	0.3244	3.48778	0.24372	3.7952	0.302	3.84	0.29216	3.77838	0.32156	3.93043	0.24518	3.95955
2	adult	3.86648	0.73365	4.0018	0.72577	3.82677	1.04399	3.85241	0.7986	4.0727	0.64106	3.94022	0.7398	3.91092	0.57425
2	adult	4.06769	0.63659	4.20501	0.60523	4.06572	0.79911	3.92915	0.58337	4.12548	0.60223	3.9737	0.68972	3.91647	0.49881
2	adult	0.28759	3.52779	0.27582	3.61201	0.24919	3.64646	0.31279	3.70438	0.33071	3.79284	0.38825	3.88717	0.28822	3.60169
2	adult	0.24864	3.4509	0.26463	3.97254	0.23262	3.93104	0.33135	3.84019	0.34355	3.7347	0.36208	3.85042	0.31856	3.87305
2	adult	0.58355	0.36235	0.57402	0.39307	0.57755	0.36659	0.51621	0.45559	0.55388	0.35986	0.54617	0.45694	0.54142	0.36803
2	adult	0.2163	3.72404	0.27689	3.78681	0.20474	3.89751	0.34898	3.83111	0.31241	3.78857	0.33152	3.86489	0.24418	3.82904
2	adult	0.47499	2.52594	0.55741	2.71927	0.47926	2.69235	0.5519	2.89784	0.58483	2.79208	0.5499	2.97481	0.56359	2.78366
2	adult	0.20392	3.80717	0.34483	3.7737	0.17252	3.83483	0.29776	3.79139	0.34833	3.74219	0.46001	3.72432	0.17975	3.93897
2	adult	0.18597	3.808	0.34946	3.78158	0.17107	3.8563	0.27001	3.88197	0.40969	3.94958	0.52244	3.679	0.19916	3.89464
2	adult	0.19262	3.78327	0.293	3.76088	0.26513	3.8051	0.32351	3.77965	0.29589	3.7408	0.53364	4.40301	0.19905	4.06458
2	adult	0.19641	3.85083	0.307	3.81082	0.17697	3.7906	0.31578	3.95247	0.36097	3.82671	0.48231	3.71258	0.34956	3.50993
2	adult	0.18593	3.68604	0.27913	3.74628	0.17132	3.86975	0.40575	3.82728	0.3386	4.11908	0.39863	4.0772	0.1873	3.81699
2	adult	0.18013	3.62144	0.26094	3.83513	0.17376	3.91824	0.21366	3.72342	0.37689	3.88016	0.43776	3.76825	0.19902	3.88374
2	adult	0.19327	3.69879	0.25445	3.7217	0.17164	3.90077	0.25112	3.79656	0.33779	3.83866	0.38929	3.56313	0.1898	3.82689
2	adult	0.20636	3.97936	0.28901	3.85331	0.1816	3.94424	0.2523	3.64956	0.31579	3.91593	0.38234	3.71944	0.20521	3.58899
2	adult	0.2033	3.74739	0.27431	4.03266	0.20058	3.95978	0.40819	3.94983	0.57392	1.96893	0.46766	4.02759	0.78395	1.0833
2	adult	0.20002	3.95044	0.27341	3.88262	0.17912	3.77997	0.30339	3.84068	0.5977	0.90865	0.36111	3.39999	0.54077	0.69082
2	adult	0.19882	3.75065	0.2454	3.7915	0.17671	3.803	0.26837	3.89712	0.78951	1.15205	0.38532	3.66781	0.19458	3.67755
2	adult	0.19598	3.72741	0.28795	3.78879	0.18012	3.73614	0.45298	3.71756	0.36158	3.67862	0.5624	3.4219	0.20198	3.91543
2	adult	0.17244	3.66197	0.2798	3.93891	0.17329	3.9237	0.24093	3.75189	0.30667	3.81624	0.38414	3.25126	0.18048	3.71452
2	adult	0.19584	3.72035	0.25119	3.72553	0.18084	4.07264	0.24012	3.71685	0.33595	3.8957	0.33527	3.64871	0.18211	3.74989
2	adult	0.19645	3.49309	0.27703	3.77477	0.18309	4.04014	0.60001	3.73203	0.38372	3.86722	0.6512	3.52101	0.1992	3.84718
2	adult	0.21881	3.63599	0.25982	3.91069	0.16841	3.68647	0.27257	3.89798	0.32783	3.81576	0.39189	3.78694	0.19298	3.50589
2	adult	0.19951	3.7152	0.2461	3.9365	0.17208	3.87293	0.24267	3.795	0.31139	3.97388	0.35489	3.62453	0.30057	3.7311
2	adult	0.26783	3.6721	0.38138	3.995	0.16759	3.82879	0.5689	3.92424	0.33971	3.684	0.61555	3.43831	0.29809	3.83501
2	adult	0.18145	3.68036	0.23151	3.7302	0.17129	3.80529	0.29551	4.01488	0.29367	3.9469	0.36715	3.69135	0.18654	4.02539
2	adult	0.17126	3.66871	0.23452	3.83548	0.29557	3.84182	0.25114	3.8101	0.32484	3.96103	0.37487	3.70348	0.18218	3.64778
2	adult	0.21211	3.77862	0.31091	3.91925	0.23079	3.8159	1.03209	3.67633	0.28539	3.85404	0.46561	3.59665	0.29523	3.68283
2	adult	0.19031	4.05712	0.24679	3.85497	0.16586	3.78905	0.27612	3.82385	0.30547	3.8815	0.37097	3.78674	0.2226	3.94397
2	adult	0.18137	3.67439	0.25386	3.87343	0.20927	3.82085	0.29095	3.92873	0.28494	3.81335	0.34805	3.79003	0.19366	3.8039
2	adult	0.18195	3.84613	0.27526	3.83309	0.28874	3.96537	0.60527	3.80924	0.28923	3.90331	0.43754	3.74254	0.19495	3.75749
2	adult	0.18668	3.90651	0.29492	3.99889	0.18514	3.86448	0.41789	3.9467	0.29545	3.80061	0.43467	3.78429	0.19871	3.94971
2	adult	0.17426	3.68734	0.25774	3.77326	0.16358	3.69778	0.49113	3.71381	0.28508	3.86086	0.43777	3.77685	0.17758	3.82606
2	adult	0.25715	3.59718	0.26259	3.83751	0.23748	4.05706	0.55215	3.60977	0.28961	3.92187	0.46091	3.54086	0.34655	3.89551
2	adult	0.17248	3.68069	0.37505	3.70399	0.17603	3.88988	0.36068	3.91143	0.30325	3.75322	0.5476	3.76568	0.20686	3.9491
2	adult	0.19408	3.98746	0.297	3.87684	0.18925	3.89258	0.41597	3.8193	0.33073	3.93705	0.49856	3.74449	0.20923	3.84214
2	adult	0.1846	3.71466	0.37027	3.86906	0.18644	3.80933	0.57193	3.75026	0.29895	3.84621	0.49284	4.2338	0.1977	3.70089
2	adult	0.21597	3.73309	0.38178	3.74386	0.2158	3.95869	0.52664	3.80792	0.52111	3.97421	0.72126	3.41233	0.25316	3.80873
2	adult	0.2343	3.67822	0.42603	3.60074	0.20293	3.84053	0.54089	3.82905	0.6241	3.69381	0.66624	3.94004	0.24229	3.75288
2	adult	0.25459	3.98321	0.44793	3.94511	0.21615	3.88996	0.60292	3.75141	0.67611	3.65366	0.93788	3.31974	0.49689	3.77435
2	adult	0.20788	4.00233	0.4238	3.83907	0.17713	3.74747	0.48103	3.83706	0.33946	3.75156	0.67038	3.57687	0.26856	3.89674
2	adult	0.21405	3.98686	0.34276	3.88827	0.18129	4.02468	0.46451	3.87191	0.30353	3.90792	0.50909	3.79711	0.52514	3.79897
2	adult	0.18517	3.70519	0.28736	3.84248	0.17084	3.83549	0.33499	3.9953	0.32566	3.71741	0.53845	3.59942	0.18966	3.94995
2	adult	0.19498	3.7802	0.33221	3.90848	0.20981	3.88473	0.35147	3.97048	0.30982	3.71454	0.41016	3.43678	0.21773	3.77334
2	adult	0.17745	3.66115	0.35216	3.76782	0.16945	3.87145	0.32952	3.77183	0.29932	3.88301	0.45096	3.65924	0.19592	3.7514
2	larve	0.19033	3.63689	0.51766	3.9698	0.29449	3.83349	0.47116	3.67453	0.81661	3.60238	0.56482	3.74786	0.33497	3.99636
2	larve	3.66067	0.89944	4.0899	0.93023	3.74801	0.99032	3.54787	1.36112	4.0229	0.73357	3.92291	0.65478	3.60392	0.7943
2	adult	0.24407	3.65896	0.39878	3.83648	0.26407	3.81957	0.71698	3.74364	0.62948	3.9186	0.7392	3.51463	0.27955	3.99665
2	adult	0.21659	3.93002	0.32222	3.82561	0.18206	3.85572	0.41719	3.7239	0.39482	4.20859	0.557	3.59406	0.24197	3.92106
2	adult	0.1928	3.76268	0.22577	3.99002	0.17109	3.89399	0.26719	3.77022	0.2721	3.82829	0.35131	3.78211	0.20133	3.87459
2	adult	0.25557	0.39282	0.21925	0.37701	0.1556	3.79525	0.31383	4.0767	0.30036	0.48391	0.28225	4.23648	0.26627	0.42857
2	adult	0.19277	3.8619	0.35468	3.76065	0.34295	3.91458	0.35413	3.94254	0.32047	3.91814	0.41267	3.71799	0.18287	3.58961
2	adult	0.18644	3.75966	0.36491	3.75494	0.17229	4.00735	0.35082	3.86554	0.53227	3.85285	0.42493	3.72677	0.22184	3.85466
2	larve	0.39871	3.6647	0.32765	3.65904	0.9348	3.4522	1.07255	3.15377	1.15407	3.42067	0.69974	3.58474	0.56128	3.69772
2	larve	0.3914	3.50735	0.3363	3.55102	0.16448	3.81048	0.57228	3.44612	0.37026	3.86695	0.41194	3.47592	0.81366	3.44489
2	adult	0.23237	3.67755	0.32288	3.79508	0.2198	4.02216	0.44039	3.89849	0.50707	3.65367	0.65013	3.37839	0.25355	3.92637
2	adult	0.24028	3.63321	0.28479	3.76169	0.18536	3.8217	0.98116	3.02431	0.42963	3.75021	0.57375	3.95137	0.19634	3.95398
2	adult	0.20316	3.74531	0.23104	3.84641	0.17609	3.98985	0.31151	3.61897	0.29636	3.76527	0.43787	3.63687	0.19042	3.81122
2	adult	0.22205	3.84553	0.21658	3.86175	0.1826	3.87019	0.29582	3.83379	0.26929	3.81313	0.31461	3.91053	0.20037	3.80803
2	adult	0.17789	3.64872	0.26857	3.76332	0.1719	3.82338	0.36593	4.13101	0.30648	3.90407	0.37563	3.58335	0.22789	3.8482
2	adult	0.19391	3.83491	0.34146	3.79255	0.19206	4.09095	0.37403	3.72973	0.30257	3.80233	0.30182	3.38229	0.20956	4.1438
2	larve	2.5427	2.21619	2.94713	2.45022	2.89708	2.3413	2.16066	2.77454	2.95807	2.23558	2.13366	2.54151	2.22184	2.15911
2	larve	3.9859	0.6081	4.07058	0.70273	3.76561	0.90777	3.76363	1.10069	4.18031	0.57093	3.96547	0.77852	3.30092	0.61592
2	adult	0.26784	3.78188	0.36908	3.91546	0.22045	3.79485	0.80895	3.58646	0.45218	3.79459	0.7433	3.47043	0.30227	3.99616
2	adult	0.25371	3.94474	0.27592	3.90965	0.18995	3.84152	0.58718	3.7317	0.37974	3.85391	0.53491	3.49338	0.2417	3.684
2	adult	0.19492	3.74099	0.34792	3.86136	0.1764	3.93398	0.29339	3.81856	0.36501	3.82419	0.49292	3.43813	0.20122	3.67722
2	adult	0.19078	3.89277	0.36936	3.76476	0.19448	4.00999	0.22433	3.81591	0.33604	3.69898	0.42098	3.61545	0.18615	3.86097
2	adult	0.18081	3.65715	0.28593	3.83342	0.18267	3.93148	0.31697	3.8926	0.28824	3.86576	0.3914	3.63009	0.1912	3.60715
2	adult	0.19487	3.69009	0.39893	3.85031	0.22413	3.75322	0.28344	3.71463	0.4762	3.84482	0.38069	3.83557	0.17357	3.78841
2	larve	0.19192	3.89713	0.34451	3.62399	0.38316	3.7976	0.3483	3.62948	0.45851	3.76432	0.42436	3.60963	0.20831	3.49035
2	larve	3.85348	0.57065	3.9624	0.65437	3.90762	0.83109	3.8935	0.68224	4.21221	0.49776	3.94356	0.71094	3.94159	0.54135
2	adult	0.274	3.74492	0.36543	3.8499	0.56354	3.61428	0.48964	3.6294	0.70233	3.53255	0.69191	3.49729	0.27266	3.81898
2	adult	0.23397	3.75455	0.28755	3.79758	0.18585	3.83595	0.39889	3.82414	0.35	3.74886	0.56517	3.56884	0.23028	3.61009
2	adult	0.22045	3.74951	0.29332	3.63804	0.18778	3.7309	0.31207	3.96852	0.37981	3.93028	0.36734	3.6123	0.20063	3.712
2	adult	0.23945	3.74282	0.34934	3.93775	0.17497	3.86626	0.37417	3.799	0.32382	3.6996	0.40173	3.55955	0.28593	3.68479
2	adult	0.18511	3.8085	0.26891	3.8321	0.18057	4.0621	0.28615	3.92823	0.3178	4.01247	0.39969	3.71952	0.18323	3.78156
2	adult	0.1961	3.67483	0.29593	3.87973	0.27091	3.73232	0.34075	3.79035	0.2995	3.84216	0.38966	3.7019	0.20369	3.99452
2	larve	0.68148	3.65917	1.10812	3.54635	0.86467	3.44516	1.10155	3.64002	1.22489	3.3107	0.93027	3.40951	0.67723	3.53244
2	larve	3.96898	0.62321	4.28227	0.68131	4.05529	0.84503	3.81002	0.78787	4.05027	0.57059	3.94891	0.66935	4.08984	0.56741
2	adult	0.24639	3.70059	0.29908	3.78359	0.27183	3.72371	0.57315	0.87481	0.48518	3.63451	0.63948	3.52604	0.26717	3.96978
2	adult	0.20628	3.75783	0.28285	3.73498	0.24224	3.94553	0.46038	3.79905	0.32548	3.71231	0.48327	3.60845	0.22443	3.68979
2	adult	0.19424	3.71168	0.35845	3.74098	0.24778	3.76257	0.28807	3.86914	0.31661	3.77919	0.40369	3.43933	0.19885	3.66895
2	adult	0.22527	3.69758	0.26252	3.92824	0.4066	3.68429	0.28478	3.85939	0.3196	3.77705	0.47382	3.72172	0.21613	3.82418
2	adult	0.22723	3.76358	0.28623	3.81217	0.2538	3.69614	0.31936	3.73628	0.37998	3.69013	0.40571	3.82961	0.18924	3.95355
2	adult	0.19884	3.87309	0.31022	3.69438	0.17343	3.81442	0.30319	3.7733	0.30141	3.79369	0.36279	3.6519	0.18273	3.66972
2	larve	3.91253	0.59978	3.98003	0.6433	4.03541	0.693	4.03204	0.55615	4.27405	0.56073	3.85642	0.57423	3.97307	0.50634
2	larve	3.75964	0.5512	4.13485	0.59977	3.95407	0.7151	3.74209	0.74022	4.155	0.51909	3.92396	0.62781	3.91422	0.45642
2	adult	0.27527	3.57433	0.37879	3.82495	0.21788	3.6166	0.34821	3.7702	0.3771	3.76672	0.5466	3.57135	0.24688	3.92736
2	adult	0.22776	3.6851	0.26612	3.70255	0.17646	3.68958	0.29403	3.70752	0.34095	3.77424	0.44321	3.65238	0.20511	3.79688
2	adult	0.19303	3.63934	0.25189	3.72638	0.18421	3.83167	0.28869	3.77907	0.31304	3.69823	0.41777	3.54168	0.1832	3.78835
2	adult	0.18204	3.86269	0.20868	3.90266	0.18518	3.89738	0.29176	3.92281	0.27109	3.79863	0.36799	3.76548	0.18509	3.73949
2	adult	0.18916	3.68265	0.30021	4.15257	0.18154	3.85695	0.28581	3.98682	0.30933	3.80451	0.40762	3.58183	0.18528	3.91563
2	adult	0.20247	3.62741	0.25594	3.90103	0.17162	3.87474	0.33192	3.62369	0.30914	3.85374	0.39389	3.60493	0.27699	3.79091
2	larve	0.26652	0.44679	0.34447	0.59444	0.23338	0.41679	3.35622	0.54882	3.68902	0.47844	0.26285	0.47253	0.23606	0.40705
2	larve	3.82709	0.66562	3.94637	0.61676	3.86072	0.78499	4.03134	0.54501	4.15142	0.53101	3.9639	0.61883	3.8963	0.48937
2	adult	0.21046	3.85627	0.29345	3.71743	0.17885	3.79974	0.41334	3.86293	0.41512	3.63048	0.56628	3.59927	0.23186	3.98128
2	adult	0.20238	3.9795	0.2682	3.69439	0.19111	3.9635	0.30815	3.80409	0.3002	3.64507	0.44813	3.58639	0.18961	3.93149
2	adult	0.1718	3.80963	0.31834	3.86846	0.17231	3.9329	0.26833	3.73716	0.30758	3.88856	0.39906	3.65823	0.18877	3.63836
2	adult	0.19938	3.85551	0.25811	3.80659	0.16378	3.87936	0.25578	3.80001	0.31927	3.9812	0.395	3.84782	0.19063	3.79357
2	adult	0.18959	3.95956	0.23205	3.74238	0.16502	3.97989	0.36793	3.83782	0.32869	3.9262	0.41663	3.76381	0.19062	3.93503
2	larve	3.74076	0.5877	3.94026	0.66497	4.02188	0.76629	3.92464	0.53438	4.14943	0.50776	3.81025	0.66735	3.97063	0.5327
2	larve	0.30302	3.69239	0.31473	3.80968	0.5429	3.76174	0.35629	3.79808	0.63228	3.74046	0.55538	3.65758	0.31063	3.6546
2	larve	3.86419	0.62646	4.12105	0.65831	3.83824	0.75006	3.91288	0.52894	4.05792	0.50959	4.00831	0.64675	3.91518	0.47643
2	adult	0.20332	3.74254	0.26298	3.90979	0.19495	3.99922	0.3482	3.88153	0.38331	3.72079	0.47548	3.65764	0.20788	4.36735
2	adult	0.20459	3.86566	0.30001	4.07804	0.18551	3.84841	0.30215	3.67279	0.31059	3.66252	0.42739	3.60019	0.19663	4.10831
2	adult	0.19719	3.74556	0.24903	3.98147	0.17683	3.89044	0.26855	3.80445	0.29634	3.73335	0.39122	3.78243	0.17907	3.84829
2	adult	0.19655	3.97951	0.27015	3.95986	0.20319	3.80204	0.34789	3.78951	0.43366	3.86447	0.41716	3.93873	0.20779	3.72168
2	adult	0.18324	3.95294	0.2226	3.94051	0.16385	3.74203	0.24964	3.81621	0.31427	3.77045	0.4041	3.72392	0.20239	3.76408
2	larve	3.76008	0.58423	3.89291	0.60299	3.88715	0.7449	3.9281	0.55412	4.24236	0.51645	3.8475	0.61627	4.05184	0.5446
2	larve	2.5208	1.99285	2.86197	2.45307	2.82982	2.28084	2.2822	2.87898	3.226	1.97119	2.40527	2.40634	2.04861	2.27087
2	larve	0.20951	3.87623	0.22985	3.77489	0.28467	3.82035	0.38217	3.72553	0.39614	3.86223	0.4245	3.86818	0.43797	0.60316
2	adult	0.22956	3.91715	0.25748	3.90248	0.18343	3.74508	0.32798	3.82623	0.39175	3.8046	0.44613	3.44765	0.21246	3.75363
2	adult	0.19364	3.89092	0.26246	4.01963	0.18093	3.82465	0.31133	3.72443	0.3226	3.82377	0.40592	3.58263	0.21456	4.0177
2	adult	0.18778	3.66217	0.30687	3.84477	0.17226	3.83248	0.28202	3.86617	0.30274	3.76662	0.40272	3.68067	0.19953	3.8131
2	adult	0.20479	3.83676	0.27244	4.23505	0.15732	3.78201	0.33048	3.88061	0.27721	3.98972	0.36239	3.7181	0.20424	3.89816
2	adult	0.21117	3.80322	0.27867	3.90817	0.18236	4.01389	0.3205	3.84111	0.29152	4.02701	0.39019	3.71137	0.21489	4.01387
2	larve	3.85858	0.54177	4.24361	0.68454	4.08058	0.7488	3.88672	0.65559	4.15994	0.50204	3.97535	0.70589	3.89756	0.64358
2	larve	4.03382	0.6571	4.04004	0.62486	4.18949	0.76865	3.87295	0.53668	4.17107	0.51358	4.0425	0.67293	4.05835	0.52004
2	larve	3.7434	0.64538	3.81964	1.07224	3.99119	0.8114	3.13158	1.43337	3.94296	0.78742	3.57259	0.92878	3.70043	0.77065
2	adult	0.21376	3.82051	0.27494	3.83775	0.18232	3.78304	0.33489	3.91918	0.39334	3.65871	0.52263	3.51937	0.20468	3.68427
2	adult	0.19136	3.92253	0.23897	3.81507	0.57943	3.78478	0.3454	3.8019	0.56786	3.87144	0.49876	3.67821	0.18856	3.83369
2	adult	0.17977	3.82062	0.26636	3.76667	0.1792	3.90497	0.30703	4.00009	0.36739	3.97588	0.4385	3.70594	0.20972	4.17516
2	adult	0.18683	3.76734	0.28488	3.94	0.21756	3.98614	0.32969	3.84323	0.31561	3.82414	0.43208	3.83564	0.19953	3.95829
2	adult	0.18652	3.69954	0.28317	3.85889	0.21672	4.06758	0.46341	3.73573	0.32909	3.77054	0.40899	3.60834	0.20151	3.92783
2	larve	2.16657	2.06872	2.82289	2.42944	2.50031	2.22038	1.98732	2.96571	3.02157	2.00492	2.26661	2.30251	2.06231	2.24378
2	larve	3.76054	0.73476	4.09842	1.04345	3.7722	0.98381	3.10397	1.70523	4.0853	0.66071	3.72864	0.96544	3.70001	0.72309
2	larve	2.37665	2.20197	2.91655	2.40194	2.75795	2.31611	2.27589	2.69819	3.12498	2.11487	2.25112	2.4014	2.10808	2.38723
2	adult	0.23106	3.78721	0.3021	3.68831	0.19555	3.98072	0.43086	3.73982	0.40398	3.83798	0.58974	3.70999	0.23183	3.76051
2	adult	0.30114	3.79214	0.44239	3.70276	0.19544	3.94602	0.44548	3.82001	0.50194	3.71197	0.58948	3.81966	0.29075	3.83336
2	adult	0.2021	3.71088	0.29706	3.75696	0.21977	3.81458	0.43054	3.74791	0.38073	3.69166	0.61539	3.70539	0.22023	3.84315
2	adult	0.19187	3.60791	0.35625	3.89457	0.18876	3.90125	0.46145	3.81035	0.35205	3.87618	0.5263	3.83616	0.22791	3.77857
2	adult	0.19756	3.69973	0.35909	3.871	0.17742	3.66942	0.63251	3.80649	0.37267	3.78062	0.55512	3.80529	0.25036	3.83015
2	larve	0.20843	3.77626	0.60864	3.72299	0.30553	3.82818	1.1413	3.42522	0.4959	3.6741	0.68927	3.67112	0.30599	3.6461
2	larve	0.32355	3.57126	0.59636	3.76742	0.18106	4.0171	0.33955	3.82654	1.30527	3.29171	0.64401	3.35823	0.41393	3.71516
2	larve	0.20559	3.69436	0.3528	3.74086	0.28956	3.89208	0.41946	3.77638	0.34449	3.77747	0.51635	3.92225	0.21921	3.67148
2	larve	3.62379	1.04599	4.11521	0.75926	3.8398	0.98831	3.92476	0.61905	4.17881	0.78134	3.8708	0.6826	3.95504	0.57638
2	larve	4.12688	0.55377	3.72325	0.58605	3.84738	0.57642	3.79084	0.65181	0.47654	1.00401	4.04365	0.60297	3.92985	0.5344
2	larve	3.87743	0.60593	3.98526	0.63493	4.03934	0.74841	3.97433	0.5896	4.2572	0.52663	3.86013	0.662	4.02153	0.52521
2	larve	3.89968	0.66036	4.13346	0.63792	3.90142	0.66724	3.98883	0.58093	4.02737	0.55431	3.82016	0.68459	3.96309	0.53258
2	larve	0.35833	3.79248	0.5186	3.92918	0.46884	3.63355	0.42644	3.81479	0.30135	3.76083	0.51069	3.58435	0.20137	3.82292
2	larve	0.44933	3.92197	0.66111	3.9046	0.59118	3.61542	0.55969	3.83454	0.88877	3.61907	0.65246	3.21525	0.34528	3.66805
2	larve	0.20498	3.74956	0.36577	3.83046	0.17856	3.88108	0.51828	3.74764	0.35907	3.8551	0.53315	3.74573	0.20242	3.83942
2	larve	0.20513	3.72326	0.31976	3.83274	0.20361	3.90695	0.31564	3.80547	0.40333	3.73782	0.53721	3.63676	0.20787	3.69007
2	larve	3.68377	0.82948	3.88648	0.71924	3.66649	1.0408	4.01165	0.5758	4.07154	0.5827	3.8383	0.78746	4.04157	0.52519
2	larve	3.90375	0.66046	4.11112	0.66277	3.90696	0.81591	3.95107	0.71235	3.92774	0.53085	3.79418	0.76671	4.14051	0.55546
2	larve	4.02794	0.70681	4.08593	0.65579	3.83982	0.73014	3.95245	0.56534	4.19959	0.55429	3.79694	0.63777	3.99548	0.53256
2	larve	3.74768	0.65545	4.03454	0.65288	3.99542	0.75957	4.07573	0.58726	4.30437	0.60108	3.71264	1.05218	3.92905	0.53642
2	larve	3.70706	0.72631	4.02432	0.64417	3.85436	0.72013	3.82955	0.53299	4.28528	0.53132	3.72914	0.59618	3.86347	0.56033
2	larve	3.82776	0.66468	4.02217	0.66157	4.04437	0.74323	3.68566	0.79265	4.19563	0.55804	3.88924	0.69415	3.94269	0.56975
2	larve	0.1891	3.7061	0.38594	3.92057	0.20853	3.99219	0.39011	3.76011	0.49035	3.85721	0.4697	3.75377	0.22223	4.24639
2	larve	3.73069	0.61724	4.09779	0.65847	3.92868	0.82052	3.45473	0.89332	4.03578	0.55604	3.64627	0.65976	3.7859	0.45897
2	larve	0.28592	0.4176	3.92338	0.72283	3.68508	1.07384	4.04509	0.57783	4.15327	0.6692	3.9584	0.75464	4.01878	0.53603
2	larve	3.93613	0.6102	3.99454	0.62078	3.94946	0.80925	3.76118	0.68966	3.88189	0.59827	3.82846	0.68993	4.02023	0.51232
2	larve	3.8633	0.62819	4.16362	0.64451	3.88916	0.73269	3.84792	0.63473	4.07161	0.57403	3.94408	0.70024	4.06908	0.60803
2	larve	0.20041	3.77611	0.30408	3.87961	0.25694	3.73714	0.39031	3.84114	0.27917	3.99282	0.35424	3.90237	0.22366	4.11466
2	larve	0.18364	3.87295	0.28054	3.86549	0.17768	3.89093	0.36313	3.77458	0.26681	3.992	0.39563	3.6776	0.18464	3.77562
2	larve	3.81604	0.6859	4.02577	0.67831	3.98978	0.79559	3.79203	0.52928	4.18225	0.57981	3.92712	0.6586	4.06634	0.52899
2	larve	0.19803	3.80441	0.26001	3.87857	0.16762	3.82141	0.29544	3.67499	0.36645	3.91544	0.4637	3.73745	0.33012	3.63551
2	larve	0.51032	3.44588	0.64948	3.51924	0.69443	3.58331	0.75414	3.69931	0.67066	3.61597	0.65684	3.44714	0.47276	3.73883
2	larve	1.71812	3.00741	2.66806	2.47344	3.10844	2.2195	2.03672	3.13979	2.34865	2.65396	3.06418	1.3294	2.6013	2.10421
2	larve	3.85281	0.63081	4.08315	0.62805	3.94289	0.75208	4.03976	0.55006	3.92265	0.52935	3.7387	0.66353	3.93987	0.57
2	larve	0.20937	3.68662	0.41851	3.86876	0.18368	3.99403	0.33644	3.78681	0.39582	3.84091	0.44044	3.56327	0.18635	3.38029
2	larve	3.57614	1.03693	3.70788	1.09339	3.50639	1.06365	3.0991	1.46318	3.68207	1.13088	3.18428	1.34996	3.37696	1.07488
2	larve	0.28779	3.82134	0.42795	3.54329	0.25863	3.75317	0.51443	3.75252	0.68461	3.79123	0.42206	3.53121	0.32629	3.90685
2	larve	3.81261	0.60235	3.97743	0.63151	3.897	0.6587	3.7206	0.51673	4.34073	0.58359	3.79838	0.61436	3.93396	0.48493
2	larve	0.20349	3.74048	0.3047	3.85453	0.19457	4.08657	0.31729	3.69597	0.33867	3.85965	0.46257	3.55254	0.20865	3.7311
2	larve	1.67426	2.63878	2.39728	2.64067	2.25051	2.55994	1.56319	2.98138	2.34885	2.39303	1.77417	2.7298	1.64633	2.48455
2	larve	3.4691	1.59048	3.47331	1.3737	3.75154	1.00462	3.25678	1.7812	4.09146	0.63767	3.86233	0.71821	3.92148	0.53637
2	larve	3.8739	0.62892	3.95988	0.59476	4.01746	0.73336	3.84296	0.58539	4.14153	0.55234	3.76324	0.62078	3.78922	0.66934
2	larve	0.22529	3.63949	0.41085	3.75951	0.65414	3.31006	0.40588	3.71775	1.24553	3.37219	0.41547	3.54186	0.20342	3.9378
2	larve	4.02675	0.64547	3.88045	0.83693	3.7342	0.81304	3.5416	0.76833	4.04608	0.60906	3.92284	0.69265	3.80444	0.56531
2	larve	3.79611	0.59858	3.98547	0.6477	3.90245	0.76522	3.82477	0.54441	4.208	0.5673	3.68533	0.5533	3.67276	0.50166
2	larve	3.79325	0.56896	4.15506	0.66784	3.8087	0.68977	3.93441	0.54996	4.26159	0.57044	3.65221	0.61274	3.76679	0.62617
2	larve	3.84573	0.68483	4.03561	0.61895	4.00301	0.7869	3.36488	1.56456	4.05749	0.5184	3.82298	0.81481	3.87414	0.59391
2	larve	3.90283	0.65482	4.13807	0.72885	3.91206	0.8655	3.93663	0.70419	4.17656	0.59721	3.80614	0.60452	3.80909	0.558
2	larve	3.84497	0.69007	4.00114	0.66119	3.76166	0.96498	3.8635	0.71256	4.14295	0.62047	3.74574	0.71034	3.89748	0.51697
2	larve	0.19674	3.97475	0.31747	3.81552	0.18784	4.01472	0.31394	3.79024	0.33295	3.6844	0.46668	3.43664	0.23443	3.80391
2	larve	0.44851	3.53014	0.50609	3.69732	0.55242	3.67495	0.37103	3.7171	0.32745	3.73905	0.3992	3.33236	0.43419	4.06507
2	larve	3.91323	0.58878	4.13692	0.6074	3.97446	0.76751	3.74298	0.63731	4.1589	0.55838	3.96065	0.62981	0.75843	1.68738
2	larve	3.86537	0.61649	4.09491	0.62819	4.01056	0.71136	3.60776	0.53603	4.30736	0.58548	3.27081	0.52492	3.74412	0.51886
2	larve	3.69624	0.57423	3.89853	0.67886	3.92691	0.75347	3.78365	0.53306	4.02763	0.48141	3.97893	0.60253	3.67532	0.5076
2	larve	0.24131	3.64851	0.39519	3.77226	0.44472	3.67313	0.40832	3.75199	0.40722	3.8741	0.42674	3.79204	0.24308	3.79729
2	larve	0.20795	3.82219	0.29497	3.60571	0.1826	3.75668	0.35742	3.76421	0.34437	3.72217	0.51607	3.54558	0.22392	4.00291
2	larve	3.66177	0.63235	3.91702	0.60833	3.8292	0.83007	3.99501	0.58651	4.07667	0.58076	3.74682	0.60233	3.8169	0.56387
2	larve	3.82376	0.64145	4.02555	0.63663	3.88406	0.82146	3.74782	0.68719	4.20856	0.62999	3.84041	0.61635	3.97895	0.5367
2	larve	0.17705	3.78489	0.22264	3.8921	0.24543	3.81696	0.32018	3.75275	0.32313	3.76859	0.41832	3.70411	0.3903	3.45679
2	larve	3.94086	0.55425	4.17481	0.61715	4.1091	0.66523	3.95686	0.54325	4.18727	0.5837	3.94269	0.56579	3.92254	0.52361
2	larve	3.96757	0.56696	4.05321	0.60058	3.83784	0.70378	3.88029	0.71069	4.25902	0.53221	3.96807	0.61401	3.87433	0.52313
2	larve	3.99529	0.61555	4.02885	0.60567	3.89987	0.73584	3.87451	0.69062	4.19532	0.53013	3.82838	0.67685	3.85933	0.50182
2	larve	3.63619	0.76162	4.00589	0.78422	3.86375	0.96679	3.08416	1.88137	4.09418	0.72797	3.63696	0.85222	3.53701	0.89692
2	larve	0.26406	3.48155	0.32156	3.60074	0.23029	3.87575	0.42687	3.6814	0.32738	3.88227	0.47831	3.5366	0.23693	3.60704
2	larve	3.89929	0.73727	4.0524	0.62422	3.87494	0.86983	3.84871	0.55157	4.04774	0.62478	3.88205	0.71272	3.91867	0.59638
2	larve	3.71191	0.70704	4.0237	0.71147	3.94774	0.89085	3.52139	1.7216	4.10774	0.63903	3.59511	0.8032	3.8423	0.66031
2	larve	0.20684	3.75324	0.20823	3.8732	0.1912	3.86313	0.20972	4.01495	0.26133	3.80185	0.32081	3.77583	0.18531	3.8042
2	larve	3.66835	0.58633	4.00776	0.61598	3.74647	0.75648	3.76973	0.54254	4.13464	0.57334	3.84441	0.57481	3.93886	0.56599
2	larve	3.65827	0.58606	4.13893	0.63643	3.90352	0.69266	3.77363	0.54151	4.07943	0.54028	3.87341	0.67536	3.84516	0.48213
2	larve	3.89271	0.56387	4.09061	0.71439	3.992	0.82117	3.51329	0.67237	4.21727	0.55489	3.80632	0.69769	4.00036	0.55753
2	larve	0.23588	3.78134	0.75871	3.83571	0.33428	3.86191	0.72841	3.66523	0.71844	4.01833	0.51096	3.83799	0.25947	3.78605
2	larve	0.21826	3.73277	0.41157	3.72216	0.17969	3.77885	0.55193	3.70442	0.42426	3.71738	0.52072	3.7042	0.29275	3.82773
2	larve	0.42338	3.78545	0.42321	3.83974	0.29561	4.07635	0.56265	3.73302	0.48761	3.91251	0.55076	3.70567	0.31562	3.79132
2	larve	0.31395	3.92223	0.31292	3.74003	0.27702	3.93137	0.36185	3.86279	0.36635	3.86518	0.4428	3.65922	0.22171	3.79062
2	larve	3.65088	0.59861	3.90678	0.68301	3.94292	0.74887	3.41099	0.85007	4.12647	0.55535	4.00545	0.65746	3.99883	0.50949
2	larve	3.9686	0.56024	4.18985	0.5918	4.00917	0.67091	3.92556	0.6186	4.14707	0.5295	3.93972	0.62943	3.996	0.59444
2	larve	3.7163	0.72639	4.1978	0.64107	3.8672	0.67433	3.80413	0.5576	4.09678	0.52606	3.86425	0.5973	3.85317	0.47349
2	larve	0.26599	3.59974	0.58987	3.70116	0.27195	3.7074	0.2394	4.08977	0.98519	3.46631	0.36665	3.93268	0.42725	3.60168
2	larve	0.20357	3.88812	0.35787	3.85167	0.17063	3.8204	0.48571	3.75419	0.47834	3.83781	0.40821	3.84456	0.23044	3.72447
2	larve	0.19985	3.56615	0.30845	3.70658	0.17756	3.89165	0.34876	3.77047	0.28817	3.77772	0.40894	3.54324	0.26403	3.62537
2	larve	0.44511	3.79966	0.4653	3.74351	0.45077	3.61542	0.66077	3.66006	0.56643	3.79783	0.64769	3.598	0.34998	0.65237
2	larve	0.18995	4.01524	0.21636	3.7605	0.1795	3.9447	0.19115	3.8809	0.37101	3.83116	0.39755	3.91653	0.19245	3.80623
2	larve	3.83929	0.57025	4.20651	0.62738	3.89072	0.64765	3.66303	1.04255	4.11188	0.52673	3.84869	0.65756	4.14873	0.50834
2	larve	3.85839	0.65467	3.99688	0.56907	3.94239	0.7782	3.50335	0.72593	4.14728	0.54036	3.74428	0.60605	3.90088	0.52367
2	larve	3.83335	0.56445	4.12546	0.60474	3.91449	0.62156	3.77067	0.51978	4.23421	0.53491	3.96641	0.6287	3.75458	0.52257
2	larve	0.20702	3.78346	0.34153	3.79799	0.64214	3.56415	0.38933	3.81424	0.4486	3.76383	0.57958	3.44124	0.24122	3.81235
2	larve	0.38729	3.54319	0.61418	3.53551	0.94497	3.33167	0.47501	3.84199	0.9799	3.58698	0.57591	3.67072	0.43758	3.82627
2	larve	0.26724	3.4956	0.4951	3.77917	0.34234	3.91361	0.51295	3.55773	0.41854	3.55644	0.46101	3.51088	0.3493	3.6846
2	larve	3.77611	0.71918	4.05209	0.6323	3.83986	0.89567	3.61599	0.84935	4.00905	0.62687	3.85661	0.72036	3.89498	0.5711
2	larve	3.92574	0.48465	4.21254	0.53808	4.02132	0.57023	3.86745	0.54131	4.18878	0.5482	3.97271	0.61764	3.88074	0.49021
2	larve	3.8487	0.49765	4.14214	0.61861	4.10431	0.53375	3.80605	0.7758	4.08145	0.47815	3.96638	0.61511	2.35996	0.38388
2	larve	3.77093	0.57671	3.9912	0.61248	3.9661	0.77173	4.02539	0.55064	4.2533	0.55142	3.97992	0.59868	3.87479	0.51453
2	larve	3.68171	0.79285	4.12661	0.67227	3.89255	0.75028	3.52169	0.74971	4.14467	0.5656	3.92558	0.66847	3.983	0.51841
2	larve	0.30617	3.79143	0.46913	3.73016	0.25136	3.75143	0.30443	3.72001	0.34121	3.87559	0.45576	3.57542	0.5292	3.57164
2	larve	0.19013	3.89809	0.41295	3.81149	0.24553	3.79531	0.33897	3.7221	0.73802	3.73297	0.56555	3.58291	0.19554	3.66853
2	larve	0.19055	3.72	0.31893	3.68069	0.17299	3.8403	0.4432	3.84242	0.30243	3.66024	0.52287	3.85467	0.21182	3.73411
2	larve	4.0234	0.82804	3.99808	0.78472	3.84579	1.08818	3.74572	1.08203	3.96928	0.68219	3.87344	0.7907	3.90594	0.54812
2	larve	3.72462	0.68099	3.90517	0.78821	3.81685	0.95527	4.11006	0.66061	4.1164	0.64351	3.91036	0.78003	3.85764	0.61971
2	larve	3.84035	0.77743	4.0063	0.7684	3.63549	1.0053	4.03549	0.64977	4.00168	0.58109	3.92297	0.7389	3.92456	0.62455
2	larve	4.00328	0.62125	3.98488	0.67386	3.89952	0.74218	3.93347	0.65129	3.99857	0.61341	4.06652	0.69645	4.08098	0.59334
2	larve	3.82766	0.74833	3.80814	0.86174	3.7193	1.22227	3.8659	0.94503	4.10309	0.74539	3.95566	0.76747	3.84183	0.62513
2	larve	0.28943	3.45879	0.51315	3.47034	0.20575	3.81065	1.21077	3.36447	0.46645	3.72082	0.60543	3.95603	0.329	3.48273
2	larve	0.31756	3.91342	0.48902	3.88008	0.22456	3.80697	0.94574	3.5562	0.43257	3.6758	0.88446	3.79162	0.40218	3.8698
2	larve	3.82033	0.76559	4.13326	0.84333	3.75699	0.94579	3.95196	0.85626	4.04254	0.63189	3.97278	0.83832	4.01207	0.63947
2	adult	3.7723	0.81574	3.99986	0.83823	3.61985	1.1982	3.93369	0.67436	4.01574	0.70138	3.92709	0.78744	3.85569	0.56749
2	adult	4.03098	0.75614	4.00023	0.65859	3.92221	0.85215	3.98851	0.56216	4.04966	0.61448	3.81851	0.668	3.92178	0.52046
2	adult	3.94589	0.69499	4.12035	0.62434	3.94631	0.93504	4.19912	0.59471	4.03571	0.59805	3.96761	0.63971	3.95907	0.60834
2	adult	3.97142	0.66969	4.15094	0.67406	3.82926	0.84451	4.20509	0.57793	4.07662	0.51819	4.01588	0.75026	3.97492	0.59703
2	adult	3.78093	0.66909	4.06693	0.6635	3.77169	0.87618	3.98865	0.58178	4.20202	0.54751	3.84083	0.62985	4.11899	0.56129
2	adult	3.96983	0.65158	4.05863	0.71779	3.90117	0.85345	4.07721	0.56728	4.125	0.53877	4.01651	0.85058	4.33268	0.57683
2	adult	3.72421	0.75732	4.00494	0.7047	3.93773	0.86407	3.8171	0.69561	4.23316	0.55122	3.66139	0.82069	4.03088	0.54445
2	adult	4.22595	0.6872	4.12673	0.7658	3.86488	1.06961	4.19264	0.63602	4.25493	0.60492	4.02163	0.68805	4.04938	0.59466
2	adult	3.92304	0.75229	4.07987	0.69853	3.70649	1.08444	3.84653	0.69586	4.10255	0.69752	3.85683	0.71059	3.62594	0.73006
2	adult	3.019	0.70199	3.78958	0.61895	3.54304	0.61696	3.26852	0.60211	3.67802	0.60066	3.47313	0.61162	3.22919	0.62901
2	adult	3.86144	0.70168	4.14988	0.72489	4.00161	0.79608	4.0073	0.55672	3.87685	0.5864	3.98392	0.76666	3.73123	0.53237
2	adult	4.02166	0.63636	4.18835	0.73824	3.9913	0.72083	4.02461	0.54702	4.22762	0.57433	3.92858	0.8146	4.00363	0.52179
2	adult	3.76605	0.63451	4.02975	0.69509	3.98068	0.71428	3.9721	0.53902	4.18671	0.564	3.88475	0.63087	3.96803	0.50925
2	adult	3.53057	0.59085	3.98556	0.59832	3.842	0.59671	3.7224	0.52421	4.16357	0.54184	3.62172	0.56377	3.82426	0.54369
2	adult	3.77469	0.65073	3.98119	0.6265	3.8909	0.68193	3.73896	0.5207	4.09132	0.53219	3.74768	0.65681	3.81114	0.48783
2	adult	3.88307	0.65884	4.11473	0.64417	3.90979	0.75912	3.90728	0.56431	4.13314	0.546	3.82883	0.6807	3.94065	0.5802
2	adult	0.28398	0.8373	3.93783	0.55731	3.43665	0.62204	3.03119	0.49354	3.21943	0.45197	2.98328	0.56209	2.64862	0.9808
2	adult	3.79234	0.65615	3.98701	0.67457	3.72368	0.7777	4.02851	0.57208	4.00493	0.54772	3.82655	0.67323	3.86173	0.5465
2	adult	3.68039	0.70462	3.95326	0.63947	3.79356	0.76796	3.85494	0.56088	3.90311	0.56347	3.80344	0.61621	3.90563	0.51855
2	adult	3.77458	0.655	4.11665	0.65092	4.0261	0.75811	3.67838	0.68517	4.18394	0.54484	3.75864	0.61119	3.79845	0.53166
2	adult	3.91723	0.64334	3.98886	0.82788	3.9808	0.80253	3.33459	0.83914	4.15388	0.54513	3.76233	0.63228	3.99538	0.54139
2	adult	3.49555	0.5971	4.11341	0.63749	3.70337	0.57716	3.39495	0.67432	3.9349	0.57247	3.53505	0.80409	3.65306	0.51354
2	adult	2.6626	1.34534	3.43983	1.26874	3.63577	0.87592	0.70823	3.36409	4.19434	0.55692	1.51213	2.39103	3.67802	0.54261
2	adult	3.81056	0.6408	4.07704	0.67329	4.13975	0.88659	3.98568	0.50313	4.22749	0.56237	3.8835	0.61688	3.75036	0.52147
2	adult	3.92506	0.72669	3.7983	0.65359	3.67651	1.04449	3.89512	0.70938	3.84407	0.86297	3.82592	0.65973	3.983	0.58224
2	adult	3.58673	0.66481	3.93973	0.60862	3.68896	0.595	3.46714	0.49256	4.0245	0.53898	3.51144	0.7373	3.83617	0.56232
2	adult	3.90485	0.60858	3.91197	0.61678	3.77024	0.81602	3.98597	0.68605	4.23684	0.61791	3.94462	0.67378	4.05573	0.59444
2	adult	3.5709	0.62069	3.89293	0.52578	3.8384	0.71409	3.49223	0.52151	4.05471	0.52294	2.77632	1.16407	3.7811	0.47893
2	adult	3.55987	0.61373	4.05252	0.63107	3.97434	0.72527	3.67947	0.52894	3.90716	0.50335	3.41136	0.73165	3.73379	0.53378
2	adult	2.71362	0.51951	0.37867	0.85048	2.85968	0.48497	3.37272	0.50499	4.03056	0.50945	3.47689	0.48896	3.45404	0.46953
2	adult	3.60925	0.71208	3.93568	0.61724	4.03258	0.74084	2.89649	1.17916	4.0209	0.50082	3.33645	0.99447	3.97383	0.51278
2	adult	3.75113	0.66825	4.15272	0.6345	3.92151	0.89981	3.77608	0.63009	4.07411	0.58535	3.96025	0.65883	3.93646	0.54126
2	adult	3.8786	0.76782	3.73019	0.70453	3.61909	1.0683	4.03067	0.63358	3.89891	0.71221	3.76712	0.69387	3.89316	0.64628
2	adult	3.89538	0.70741	3.79648	0.60855	3.81185	0.82143	3.87351	0.55603	4.23165	0.59844	3.81522	0.62136	2.33634	0.52545
2	adult	3.5519	0.64844	3.90462	0.60316	3.82896	0.77531	3.68798	0.57017	3.87615	0.48137	3.64466	0.55978	3.81519	0.494
2	adult	3.77959	0.61704	3.85375	0.61707	3.91309	0.78812	3.92027	0.55213	4.10549	0.54899	3.72171	0.71992	3.93403	0.57119
2	adult	3.4201	0.60029	4.07791	0.58793	3.84959	0.62338	3.42745	0.48786	4.12625	0.55131	3.42889	0.52034	3.60059	0.50023
2	adult	0.28753	0.46852	3.10237	0.5079	2.78399	0.49338	2.83571	0.48892	3.52699	0.48604	0.25663	0.46634	3.02487	0.93544
2	adult	3.80502	0.53526	4.18047	0.6503	4.11837	0.73671	3.62281	0.73262	4.09849	0.55207	3.80226	0.70603	4.0285	0.52125
2	adult	3.82547	0.66193	4.10854	0.64008	3.89179	0.72652	3.93778	0.54459	4.24277	0.53365	3.90263	0.65201	3.70304	0.49398
2	adult	3.80431	0.66877	4.06816	0.69433	3.80349	1.03987	3.94388	0.60231	3.94691	0.65809	3.71284	0.6958	3.93913	0.58854
2	adult	3.90054	0.57814	3.85825	0.59217	3.86224	0.73368	3.951	0.57255	4.08453	0.54774	3.93791	0.65415	3.89735	0.4691
2	adult	3.58876	0.66008	3.90055	0.59754	3.79922	0.75945	3.66621	0.53736	4.00597	0.5358	3.74315	0.58845	3.76344	0.57198
2	adult	3.9114	0.65442	4.0515	0.65279	3.96843	0.81027	3.57085	0.7081	4.01425	0.51695	3.90963	0.63234	3.94937	0.52132
2	adult	3.92326	0.63841	4.12267	0.64336	3.94993	0.68116	3.60436	0.68633	4.31361	0.55394	3.74214	0.62904	4.00831	0.53454
2	adult	3.79189	0.56698	3.90067	0.59264	3.86256	0.72905	3.84417	0.51522	4.09969	0.54696	3.99251	0.60028	3.89661	0.54167
2	adult	3.80797	0.61513	3.92281	0.65417	3.90178	0.73367	3.71992	0.90772	4.41776	0.54149	4.03227	0.62312	0.47845	0.51094
2	adult	3.79162	0.6443	4.14084	0.5705	3.881	0.76811	3.89349	0.53792	4.05086	0.53643	3.85565	0.60481	3.64834	0.48282
2	adult	3.85775	0.70562	3.89995	0.67178	3.83978	0.97654	4.03737	0.56896	3.9063	0.65428	3.90592	0.65668	3.57535	0.58509
2	adult	3.97065	0.6543	4.05574	0.62892	3.86311	0.8519	3.63573	0.5467	4.18361	0.53007	3.91478	0.64646	3.03992	0.47707
2	adult	3.226	0.5884	4.07322	0.59493	3.11566	0.55686	3.41688	0.53053	4.05165	0.51208	3.02026	0.59848	3.47505	0.53421
2	adult	3.75932	0.58043	4.02157	0.67586	3.90913	0.70137	3.85333	0.64876	4.1027	0.519	4.01444	0.66747	3.7369	0.56204
2	adult	2.58186	0.44835	3.92089	0.55646	0.24151	0.41643	1.97796	0.50576	3.92793	0.48224	2.89178	0.50015	2.75062	0.6852
2	adult	3.36653	0.59603	3.87294	0.55737	3.93198	0.57114	3.88227	0.77273	4.01533	0.53488	3.83171	0.62082	3.71716	0.47382
2	adult	3.66563	0.55381	4.02706	0.63797	3.83098	0.7344	3.63037	0.68789	4.17206	0.54226	3.83698	0.78115	3.95333	0.45172
2	adult	3.66052	0.60888	4.1065	0.61315	3.95138	0.77661	3.87983	0.5402	4.06613	0.54504	3.76765	0.65912	3.83754	0.5234
2	adult	4.1162	0.64024	3.88419	0.57944	3.88806	0.87355	3.92648	0.53771	3.98227	0.62054	4.0235	0.66759	2.06828	0.55186
2	adult	3.53298	0.6446	3.92792	0.62569	3.87586	0.74389	3.01449	1.07386	3.95509	0.51585	3.74426	0.58596	3.87629	0.55706
2	adult	2.77331	0.49267	3.83397	0.48955	0.74793	2.8683	0.48839	3.64192	3.90168	0.53758	0.81818	3.01984	3.18148	0.49776
2	adult	3.36687	0.65074	4.02471	0.59098	4.10699	0.62965	3.22994	0.51843	4.09539	0.53629	2.68463	1.14928	3.67113	0.52265
2	adult	3.57665	0.61125	4.09825	0.56786	3.78319	0.56757	3.53117	0.53868	4.04725	0.49366	3.85688	0.6328	3.75379	0.53799
2	adult	3.74097	0.54798	4.15303	0.64853	3.83706	0.70618	3.85178	0.51714	4.3122	0.57655	3.68591	0.66079	4.01835	0.49051
2	adult	3.7099	0.618	4.08709	0.61081	4.08581	0.74233	3.83009	0.50619	4.09505	0.47647	3.45024	0.96224	3.72885	0.52306
2	adult	3.69024	0.58981	4.33141	0.62143	4.02639	0.72321	2.62667	1.362	4.01734	0.51853	4.01812	0.7011	4.02926	0.5573
2	adult	3.76676	0.63509	4.00214	0.58947	3.9904	0.83928	3.92909	0.56523	4.14915	0.61653	3.92967	0.6823	3.10739	0.65337
2	adult	3.77029	0.73188	4.12728	0.70887	1.69056	1.76774	3.68121	0.56114	3.94737	0.52193	3.98439	0.67856	3.88804	0.53861
2	adult	3.72535	0.74524	3.87081	0.59899	3.84381	0.69034	3.60372	0.5357	4.10867	0.52789	3.7948	0.58439	3.73514	0.49046
2	adult	3.67432	0.66367	4.10036	0.63513	3.99001	0.68867	3.59254	0.51419	4.23796	0.53058	3.97359	0.608	4.00366	0.51455
2	adult	3.56226	0.58805	3.94537	0.55437	3.97934	0.64522	3.66385	0.53107	4.17906	0.53276	3.87298	0.65087	3.98516	0.54367
2	adult	3.07734	0.98087	4.1012	0.55511	3.89913	0.58174	3.53515	0.52533	4.2012	0.52005	3.25957	1.04226	3.8534	0.54993
2	adult	3.55653	0.57639	4.0776	0.58732	3.78479	0.81267	2.20666	2.1262	4.36838	0.53529	3.25562	1.05959	3.34525	0.83729
2	adult	3.87359	0.69234	4.18913	0.6312	4.05394	0.74543	3.84871	0.55667	4.27001	0.55304	3.86709	0.64806	4.03199	0.59708
2	adult	3.87131	0.66433	3.95655	0.65633	3.83027	0.94933	3.91585	0.54854	4.09921	0.57335	3.97374	0.67984	4.01696	0.50249
2	adult	3.8631	0.66147	3.8751	0.60146	3.84785	0.73945	3.77286	0.58489	4.02379	0.54268	3.84723	0.62222	4.06456	0.58328
2	adult	3.46056	0.60663	4.0112	0.6017	4.01733	0.75288	2.73606	1.07361	4.04495	0.73219	3.85294	0.64656	3.53757	0.65654
2	adult	4.084	0.63995	4.07568	0.61914	3.80267	0.68283	3.66633	0.71063	4.08403	0.56657	3.87053	0.66283	3.87623	0.6127
2	adult	3.65331	0.61119	3.90532	0.59278	4.01068	0.65754	2.29541	2.18993	4.1155	0.55272	2.25705	2.16775	3.56193	0.68099
2	adult	1.56471	1.84513	4.15264	0.57652	3.9729	0.64082	2.06807	2.27993	4.15438	0.515	0.95378	3.11937	3.61858	0.54696
2	adult	3.83873	0.5225	4.17205	0.59947	4.05653	0.70471	3.68896	1.27507	4.05177	0.49285	3.93501	0.65911	4.03393	0.48565
2	adult	3.80154	0.55931	4.32348	0.63302	4.06195	0.72777	4.04875	0.55632	4.36235	0.54147	3.94124	0.64358	3.93642	0.55164
2	adult	3.65333	0.64548	3.95774	0.60427	3.88068	0.73129	3.93276	0.55152	3.88676	0.58024	3.61073	0.64211	3.68719	0.52354
2	adult	3.74497	0.618	3.93711	0.56208	3.81028	0.72253	3.9253	0.55932	4.07391	0.58805	3.86403	0.67423	3.64528	0.50374
2	adult	2.81621	0.8822	3.87245	0.80494	4.14358	0.72676	0.55107	3.03054	3.91764	0.56935	2.6123	1.33388	3.25477	0.66111
2	adult	3.57202	0.6047	4.09846	0.65223	3.96838	0.74512	3.36323	0.74894	4.3788	0.62956	3.77492	0.66609	3.98753	0.53437
2	adult	3.47115	0.60426	4.20055	0.63419	3.93711	0.66909	3.56617	0.53295	4.14161	0.52847	3.74294	0.54113	3.94273	0.5107
2	adult	3.59233	0.65394	3.91598	0.55953	3.82344	0.92771	2.47094	2.06348	4.06056	0.64874	3.72166	0.57057	3.52306	0.80297
2	adult	3.29703	0.7735	3.68151	1.0122	3.92509	0.63548	2.50818	1.9232	4.05691	0.50491	2.30738	2.0903	3.87329	0.60086
2	adult	3.91156	0.64825	4.11362	0.63272	4.10066	0.70477	3.94043	0.54569	4.29946	0.56194	3.96031	0.64215	3.79984	0.5341
2	adult	3.83077	0.64347	4.03312	0.63398	3.71704	0.71417	3.80115	0.59813	3.98363	0.58401	3.79852	0.59342	3.85821	0.52159
2	adult	3.78325	0.61837	4.05322	0.56515	3.92119	0.75093	3.97923	0.59244	4.1006	0.62778	3.89376	0.64737	3.75994	0.53397
2	adult	3.26394	0.84014	3.76104	0.98243	3.6608	0.98909	2.45735	1.0233	3.87522	0.73185	2.29205	1.92963	3.79757	0.5384
2	adult	3.71481	0.66656	4.09106	0.60646	3.94357	0.81389	2.53413	2.20428	4.2321	0.53802	3.43481	1.10542	4.00005	0.54169
2	adult	3.4626	0.57693	4.03807	0.70528	3.65949	1.06086	0.91264	3.04974	4.05377	0.48779	3.05499	1.24436	3.812	0.52735
2	adult	3.35852	0.70891	4.15262	0.68659	3.95729	0.73905	2.04008	2.65352	4.12681	0.54397	3.2246	1.25962	3.2455	1.05341
2	adult	3.64957	0.74996	3.98723	0.64447	3.75086	0.79237	3.33946	1.43092	4.03222	0.78765	3.7459	0.80803	3.87117	0.63082
2	adult	3.55539	0.59957	4.08911	0.58646	3.91936	0.76038	3.74689	0.53686	4.15253	0.50566	3.8295	0.59202	3.84243	0.48464
2	adult	2.55199	2.45528	2.77001	2.51955	2.7531	2.35355	2.35943	2.6624	2.40765	2.7991	2.1403	2.57068	1.96603	2.39605
2	adult	0.27974	0.45049	0.2392	0.46948	0.25075	0.47319	0.25342	0.45383	0.22404	0.46336	0.27746	0.46123	0.22296	0.43404
2	adult	0.33555	0.65655	0.24847	3.93407	0.24405	3.55221	0.28536	3.67147	0.28849	3.75909	0.34211	0.66139	0.32833	3.20779
2	adult	0.20967	3.96953	0.25411	3.91306	0.19657	4.17927	0.33719	3.90325	0.28291	4.13618	0.30574	4.29711	0.20285	3.87228
2	adult	0.21838	3.13094	0.20792	3.81512	0.17789	3.73531	0.19122	3.40706	0.41283	3.62835	0.23397	3.86389	0.19241	3.45388
2	adult	0.23677	3.7769	0.27725	4.01402	0.19106	3.99875	0.32436	3.80484	0.26121	3.93524	0.28964	3.83325	0.19317	3.92384
2	adult	3.62946	0.5535	3.96065	0.58537	3.80893	0.61411	3.47716	0.54619	3.92731	0.56096	3.67411	0.67804	3.40174	0.46242
2	adult	3.94709	0.56448	4.07078	0.56998	4.02366	0.59082	3.81977	0.59314	4.3401	0.59691	3.74754	0.61729	3.73099	0.5111
2	adult	0.20683	3.58747	0.25889	3.78303	1.28021	3.23536	0.27771	3.83469	0.46706	3.67757	0.80647	3.20909	0.79053	3.48196
2	adult	2.05108	0.52817	0.30257	3.63879	3.86857	0.72076	0.17661	3.16529	0.2156	0.43181	0.56609	3.57688	0.20958	4.0242
2	adult	0.23544	3.45482	0.23063	3.80244	0.215	3.98183	0.25856	3.83471	0.26037	3.88415	0.27187	3.54232	0.22052	3.6761
2	adult	0.22284	3.75433	0.27836	4.0009	0.18225	3.89576	0.22965	3.96031	0.2536	3.87982	0.26927	3.7969	0.19441	3.59625
2	adult	0.18682	3.86382	0.2599	3.89594	0.1864	3.98493	0.34957	3.86747	0.29595	3.81563	0.41965	3.58938	0.17684	3.92516
2	adult	0.21365	3.79768	0.25119	3.92075	0.18806	3.95775	0.33738	3.92805	0.24282	3.89546	0.32247	3.86863	0.22384	3.73614
2	adult	2.07098	0.52423	1.65829	0.47515	2.72091	0.46352	2.55566	0.67556	2.96281	0.43588	1.23801	0.62106	1.89319	0.53907
2	adult	3.96642	0.66953	3.98845	0.62961	3.94784	0.82741	3.90058	0.5559	4.07557	0.61037	3.98212	0.71034	3.66837	0.5631
2	adult	3.1106	0.61528	0.1812	3.53321	0.24488	0.48385	1.05407	2.33233	2.62005	2.42144	1.16968	3.07134	0.99982	3.05173
2	adult	0.21685	3.90301	0.28362	3.77389	0.18781	3.85902	0.44676	3.72945	0.36522	3.65364	0.6642	3.38208	0.20192	3.87684
2	adult	0.28103	0.47962	0.28779	3.85213	3.65799	0.70039	0.22701	0.46385	0.22579	0.43395	0.4891	3.66152	0.20495	3.8865
2	adult	0.21088	3.63746	0.2269	3.97261	0.20113	3.8263	0.21173	3.89617	0.23974	3.80054	0.26984	3.92724	0.20441	3.97877
2	adult	0.19767	3.82033	0.28033	4.03718	0.18852	3.94753	0.33323	3.9305	0.27718	3.92269	0.3676	3.75309	0.18993	3.94251
2	adult	1.758	2.23544	2.14433	2.66703	2.11012	2.51823	1.91009	2.74699	2.59984	1.98088	1.8087	2.36796	1.59248	2.16366
2	adult	2.2194	0.555	3.55302	0.51505	3.48345	0.49622	2.77172	0.60973	3.89138	0.54555	3.11268	0.63952	2.69029	0.50807
2	adult	3.93114	0.65893	4.22725	0.64202	3.90624	0.83536	3.93085	0.55077	4.08381	0.56158	3.88143	0.72118	3.86977	0.43575
2	adult	0.45157	3.77421	0.47399	3.60329	0.25594	4.04168	0.56516	3.95008	0.58319	3.72734	0.86326	3.56033	0.27795	3.71515
2	adult	0.21942	3.81355	0.21876	3.8689	0.19258	3.91733	0.2215	3.64402	0.22825	3.82177	0.28211	3.39108	0.198	3.64295
2	adult	3.68827	0.59321	3.87517	0.59785	3.6777	0.68224	3.74849	0.5624	3.96977	0.539	3.79422	0.65695	3.56084	0.51913
2	adult	0.26008	0.45208	0.28364	0.4685	0.24787	0.3988	0.22691	0.45286	0.2454	0.43263	0.34526	0.88153	0.2314	0.46961
2	adult	0.20829	3.3492	0.21269	2.74455	0.18533	3.73613	0.18406	3.57862	0.24139	3.89376	0.25882	3.47471	0.97241	1.96838
2	adult	0.22085	3.65712	0.23725	3.8701	0.17961	3.73796	0.25609	3.68009	0.23662	3.80224	0.26392	3.91873	0.26922	3.41651
2	adult	3.99112	0.55232	3.96483	0.59884	3.98636	0.71107	3.82303	0.58835	4.05415	0.52642	3.70261	0.57203	3.68286	0.52096
2	adult	3.96963	0.60632	4.20293	0.61945	4.05775	0.78492	3.90438	0.51972	4.18623	0.57148	4.05939	0.71151	4.11544	0.51202
2	adult	3.64174	1.2359	3.9295	0.81818	3.50093	1.08358	3.12507	1.64114	3.84355	0.80245	3.25156	1.1452	3.49302	1.02798
2	adult	0.50129	0.51977	0.25517	0.45498	0.25139	0.4575	0.23969	0.50807	0.2696	0.43647	0.25714	0.46883	0.24759	0.4527
2	adult	0.24726	3.9867	0.28487	3.80361	0.18736	3.82077	0.36961	3.86156	0.33952	3.72461	0.50363	3.81026	0.22196	3.82947
2	adult	0.22768	3.58384	0.24988	4.02091	0.20345	3.75866	0.26765	3.89687	0.26099	3.94926	0.25133	3.82523	0.18389	2.9904
2	adult	0.20149	3.55996	0.25228	3.97277	0.18648	3.85785	0.23679	3.89805	0.2807	3.94595	0.34733	3.73629	0.20788	3.93162
2	adult	0.2152	4.05741	0.30931	3.88123	0.18614	3.83434	0.32011	3.68965	0.35676	3.98081	0.40225	3.61881	0.19428	3.81518
2	adult	3.33763	0.58456	3.84554	0.58346	3.63326	0.54503	3.2585	0.54354	3.94315	0.51095	3.02203	0.55876	3.3288	0.46427
2	adult	3.63896	0.5724	3.85589	0.5948	3.93412	0.74229	3.66345	0.54503	3.91876	0.57267	3.73789	0.65747	3.62023	0.49562
2	adult	0.27518	3.8899	0.41663	3.86876	0.23579	3.83206	0.60574	3.76559	0.44775	3.67217	0.73008	3.79955	0.25788	3.82363
2	adult	0.22983	3.91842	0.25322	3.79738	0.19508	3.67499	0.27383	3.6091	0.37336	3.73044	0.34806	3.75048	0.26016	3.79565
2	adult	0.22657	3.73626	0.27358	3.75534	0.225	3.81774	0.28002	3.89327	0.2613	3.75534	0.27007	3.67808	0.23378	3.73743
2	adult	3.0333	0.52277	3.60418	0.55836	3.3668	0.50683	2.58987	0.49082	3.66279	0.50562	3.02212	0.52691	2.88346	0.4788
2	adult	3.4827	0.54558	4.00928	0.57868	3.79623	0.63033	3.75788	0.57651	3.78071	0.49914	3.5528	0.59376	3.54342	0.50662
2	adult	0.19597	3.68772	0.25651	3.99851	0.2023	3.71914	0.28295	3.77352	0.26897	3.90416	0.35207	3.75758	0.20474	3.62656
2	adult	3.82096	0.59415	4.0146	0.60118	3.82425	0.73917	3.89891	0.53119	4.31442	0.54677	3.92074	0.6678	3.72982	0.56616
2	adult	3.75174	0.60342	4.12182	0.65321	3.9425	0.76281	4.09836	0.64144	4.00643	0.58468	4.00863	0.71541	3.92742	0.59101
2	adult	3.11309	0.93656	4.03749	0.7173	3.72336	0.78256	3.77247	0.54396	3.95026	0.53905	3.75532	0.60509	3.40886	0.50461
2	adult	2.13009	0.51726	3.12855	0.54191	2.5408	0.4921	1.16764	0.44006	3.51087	0.51291	1.76175	0.47932	2.61031	0.50826
2	adult	0.20603	3.85276	0.25366	3.69782	0.192	4.11335	0.28395	3.76839	0.29632	3.84029	0.40192	3.61453	0.18881	3.82782
2	adult	0.18416	3.48207	0.27897	3.8611	0.17393	3.77632	0.23867	3.97478	0.32457	3.87754	0.37082	3.63484	0.20646	3.81743
2	adult	0.38628	0.54462	0.34551	0.46968	0.31645	1.01744	0.22789	3.68582	0.32675	2.09284	0.30067	1.99377	0.36861	0.92519
2	adult	0.22762	3.19946	0.2034	3.69715	0.18713	3.67782	0.19148	3.6884	0.19671	3.16198	0.37777	1.27721	0.20399	3.23417
2	adult	2.40974	0.47237	3.2175	0.44163	2.85919	0.54983	1.94929	0.5533	3.47863	0.47588	1.73789	0.5206	2.3853	0.42529
2	adult	3.31719	0.6357	4.18895	0.66326	3.81023	0.64678	2.91904	0.5479	3.94431	0.50005	3.82192	0.68947	3.5999	0.50003
2	adult	0.23369	3.83712	0.27018	3.92118	0.22013	4.00617	0.29957	3.82688	0.29683	3.93267	0.32048	3.51484	0.27763	3.71
2	adult	0.22955	3.99871	0.23923	3.86556	0.18719	3.80077	0.24728	3.8412	0.23162	3.91953	0.23434	3.79562	0.20839	3.88767
2	adult	0.21432	3.77833	0.24094	3.91707	0.18311	3.8272	0.25447	3.94199	0.24581	3.90436	0.32691	3.77438	0.20085	3.93823
2	adult	0.19786	3.80739	0.27104	3.77531	0.17221	3.94155	0.29024	3.90911	0.31923	3.84284	0.40652	3.6187	0.19738	3.85771
2	adult	0.19169	3.85178	0.23316	3.86278	0.17166	3.94206	0.28097	3.83435	0.27399	3.96846	0.34299	3.79675	0.21081	3.89412
2	adult	0.23734	3.7446	0.25	3.92345	0.21595	3.88184	0.28026	3.9456	0.23486	3.88827	0.23527	3.83851	0.23852	4.00177
2	adult	3.36949	0.53395	4.10936	0.59934	3.5632	0.7796	2.6217	0.99127	3.95089	0.51109	3.48112	0.5542	3.42641	0.48582
2	adult	3.79467	0.48712	4.13629	0.48938	4.01273	0.51871	3.86305	0.58041	4.1067	0.45231	3.85153	0.49676	3.62353	0.44925
2	adult	0.26724	3.78958	0.24783	3.8129	0.21902	3.57086	0.27838	3.7445	0.28531	3.77701	0.28239	3.73524	0.23465	3.42258
2	adult	0.22044	4.05939	0.21911	3.74761	0.20615	4.06853	0.29223	3.8057	0.25417	3.889	0.24953	3.86314	0.21616	3.90691
2	adult	0.20434	3.83252	0.27173	3.81054	0.35999	3.73086	0.22361	3.9701	0.76377	3.6365	0.32255	3.95841	0.33462	3.69777
2	adult	0.58076	0.55331	0.75008	0.60651	1.11266	0.74916	1.70275	0.78494	1.26504	0.50476	0.33548	0.62381	0.81992	0.5063
2	adult	0.27923	3.70404	0.20854	3.85619	0.18076	4.11418	0.21365	3.86049	0.28899	3.8702	0.50434	3.51493	0.18432	3.83797
2	adult	3.7255	0.49946	4.2122	0.6687	4.01421	0.56676	3.9614	0.55515	4.22161	0.57813	3.93688	0.62461	3.59066	0.47936
2	adult	1.66272	0.51677	3.83028	0.48099	3.58491	0.47585	2.84459	0.53608	3.84497	0.44522	2.65651	0.53346	2.81067	0.54016
2	adult	3.65822	0.5463	3.93431	0.58097	3.98553	0.64736	3.75435	0.56694	4.01624	0.52894	3.76157	0.58629	3.71338	0.48167
2	adult	0.25461	3.60909	0.24972	3.90487	0.20948	3.71927	0.2849	3.88062	0.2983	3.829	0.26227	3.78446	0.24662	3.61607
2	adult	0.3054	0.4941	0.25043	3.98661	3.7851	0.65668	0.16171	3.2734	0.22896	0.42954	0.49016	3.84764	0.20303	3.96512
2	adult	0.22101	3.97572	0.25043	3.96682	2.32535	2.47295	0.22506	3.82311	0.41979	3.7011	0.27676	3.76548	0.21243	3.9202
2	adult	3.62869	0.62496	3.92032	0.71638	3.8414	0.74306	3.36735	1.09062	3.98704	0.56607	3.66356	0.64596	3.58889	0.66177
2	adult	0.29051	2.18697	0.24103	3.50083	0.20534	3.70625	0.21737	3.79571	0.21612	3.7816	0.24401	3.04755	0.22651	3.13102
2	adult	2.74761	0.52835	3.8969	0.52212	3.71515	0.47968	3.04056	0.53382	3.87893	0.44669	3.40801	0.63112	3.14138	0.5718
2	adult	3.82495	0.47362	4.20771	0.55003	4.58655	0.5937	3.897	0.56113	4.27677	0.52387	3.75706	0.57122	2.96292	0.50356
2	adult	3.89919	0.60054	4.1493	0.66029	3.93571	0.7303	4.08269	0.54909	4.19639	0.54692	3.83981	0.61335	3.92529	0.54375
2	adult	0.23639	3.64185	0.26135	4.22992	0.21407	4.14709	0.29437	3.99432	0.29052	4.11314	0.2375	3.94616	0.22604	3.70878
2	adult	0.22089	3.58579	0.23981	3.85021	0.20149	3.92537	0.27301	3.88	0.26807	3.95879	0.27804	4.04184	0.21917	3.65781
2	adult	0.21408	3.3464	0.20727	3.80418	0.18357	3.58629	0.19466	3.82891	0.20152	3.54621	0.23991	2.55216	0.2244	2.03213
2	adult	0.22831	3.81945	0.23807	3.75075	0.19829	3.81687	0.24904	3.83678	0.23918	3.7928	0.25479	3.658	0.22307	3.67612
2	adult	0.20607	3.73076	0.23281	3.88995	0.18332	4.05727	0.24176	3.98171	0.26671	3.94573	0.28045	3.7216	0.19043	3.66882
2	adult	3.16738	0.92478	3.94011	0.59564	3.79997	0.65475	3.44048	0.49315	4.17823	0.5405	3.78639	0.59231	3.7683	0.49592
2	adult	3.83484	0.54527	4.01468	0.63206	4.02486	0.62078	4.05165	0.66524	4.18299	0.58553	4.03542	0.71355	3.88327	0.52183
2	adult	3.54365	0.59395	3.96606	0.60781	3.7167	0.7847	3.40283	0.67374	3.99564	0.52436	3.72411	0.63911	3.68203	0.56644
2	adult	0.25723	3.61976	0.34644	3.89354	0.22526	3.89399	0.48383	3.8007	0.38565	3.63089	0.53069	3.89599	0.24817	3.79408
2	adult	3.53038	0.69084	3.81558	0.63126	3.7243	0.80053	3.48595	0.7134	3.92067	0.55614	3.55543	0.91887	3.69866	0.5138
2	adult	0.21791	3.60407	0.2082	3.99802	0.19228	3.66583	0.26065	3.69276	0.24371	3.7671	0.26496	3.75686	0.21652	3.70846
2	adult	0.27931	3.47543	0.26097	3.91297	0.2446	3.96102	0.30904	3.78827	0.28457	3.75275	0.30756	3.54354	0.26344	3.83588
2	adult	0.27561	0.45868	0.25228	0.51904	0.22804	0.43519	0.20616	3.21454	0.2323	0.45808	0.30592	2.03903	0.22906	0.42382
2	adult	3.23283	0.52811	3.85763	0.62368	3.63239	0.57951	3.33438	0.78046	4.05974	0.57216	3.15397	0.59484	3.19615	0.47872
2	adult	3.48183	0.59131	4.05299	0.68449	3.64954	0.79613	3.51239	0.80704	4.02703	0.61501	3.70538	0.63277	3.85369	0.52025
2	adult	3.28895	0.6025	3.83347	0.55809	3.62117	0.71206	3.06997	0.61844	3.98006	0.57877	3.49733	0.59194	3.62503	0.51279
2	adult	3.63597	0.66393	4.09214	0.68173	3.80099	0.86251	3.67806	0.50446	4.12337	0.56279	3.60227	0.59967	3.90497	0.53108
2	adult	3.81465	0.71037	4.11489	0.71126	3.91195	0.85312	4.01958	0.60627	3.98924	0.53178	4.04108	0.81669	4.02645	0.54011
2	adult	0.25877	3.9287	0.27616	4.00664	0.2147	3.84477	0.32596	3.8658	0.27772	3.93647	0.30757	4.18905	0.28752	3.70096
2	adult	0.28994	0.49095	0.27388	0.44926	0.24629	0.44756	0.2958	0.48148	3.9086	0.5107	0.31847	0.46932	0.18506	3.04864
2	adult	0.22262	3.71443	0.32525	3.89693	0.20236	3.78551	0.34179	3.79228	0.31245	3.78842	0.38406	3.81996	0.22448	3.83783
2	larve	0.29683	0.50055	0.36476	0.58791	0.21603	2.74842	0.56246	3.75651	0.29764	0.48347	0.4397	3.87445	0.36766	0.71389
2	larve	4.03169	0.73339	4.04253	0.73933	3.80653	1.11023	3.66387	0.9353	0.8762	0.65592	4.01941	0.71532	4.0438	0.60702
2	adult	3.52003	0.53783	3.75563	0.54087	3.86089	0.58072	3.55102	0.59836	3.90484	0.5629	3.81413	0.63228	3.32884	0.50755
2	adult	3.63794	0.61563	3.89743	0.63486	3.87601	0.69857	3.74221	0.59194	3.90924	0.57998	3.82969	0.68616	3.69843	0.5121
2	adult	3.97502	0.63864	4.00841	0.60531	4.08844	0.74358	4.05542	0.68889	4.0503	0.55348	3.68187	0.6034	3.80174	0.47147
2	adult	0.20869	3.81986	0.34351	3.90858	0.19005	4.08	0.38287	3.83697	0.32053	4.11014	0.47797	3.68604	0.20437	4.11747
2	adult	0.20618	3.64456	0.2219	3.69992	0.16592	3.89371	0.53631	2.97074	0.29024	3.82759	0.31982	3.78115	0.19316	3.8451
2	adult	0.19902	3.76479	0.28357	4.08912	0.18737	3.90296	0.34055	3.61369	0.26807	4.11887	0.35717	3.71567	0.25412	3.8271
2	larve	3.82004	0.68226	4.14469	0.74016	3.79173	0.82743	4.1215	0.59677	4.28906	0.59805	3.87761	0.67791	3.81607	0.58696
2	larve	3.8675	0.73402	3.9501	0.75584	3.58908	0.93423	3.61649	0.79968	0.98899	0.84091	3.89753	0.6546	3.5654	0.53051
2	adult	3.78895	0.64343	4.03026	0.65872	3.83238	0.84375	3.89334	0.57307	4.0292	0.57786	3.78552	0.69257	3.86717	0.57203
2	adult	3.98445	0.61119	3.93254	0.57764	3.84546	0.73577	3.84579	0.60724	3.93068	0.53377	3.78917	0.68884	3.70819	0.529
2	adult	3.66911	0.61928	4.03532	0.65485	3.9074	0.86098	3.76744	0.61653	4.05739	0.59346	3.75757	0.6697	3.92024	0.54403
2	adult	0.23331	3.72009	0.24916	3.91786	0.20589	3.80505	0.27504	4.058	0.30073	4.0945	0.34284	3.76818	0.20029	3.78911
2	adult	0.20638	3.87236	0.28848	3.87505	0.17652	3.76296	0.22214	3.81894	0.32301	3.77778	0.37436	3.6047	0.17901	3.77416
2	adult	0.81255	0.57503	2.36811	0.4971	2.27582	0.52698	2.63301	0.5246	3.6145	0.49776	0.52378	0.56463	1.9229	0.50518
2	larve	3.92102	0.72607	4.05081	0.66523	3.89997	0.82	3.85274	0.55575	4.03416	0.55035	3.98296	0.70038	3.78733	0.50702
2	larve	3.95161	0.69504	4.13437	0.73729	3.87835	0.95014	4.11155	0.60431	1.01184	0.86591	4.04939	0.65944	3.79826	0.4675
2	adult	3.68784	0.76771	3.91334	0.6842	3.56038	0.93844	3.83244	0.56364	4.01965	0.62189	3.74263	0.65754	3.6328	0.50727
2	adult	3.46044	0.55099	4.11253	0.65211	3.78172	0.6794	3.5111	0.48247	3.83356	0.49411	3.83872	0.69136	3.78419	0.52861
2	adult	3.2449	0.6099	3.93205	0.56055	3.75704	0.71411	2.9491	0.61816	4.07626	0.58455	3.56423	0.57485	3.66919	0.56104
2	adult	0.20994	3.81871	0.22356	3.68071	0.23163	3.9004	0.24152	3.95712	0.25618	3.8182	0.28927	3.75142	0.20357	3.94704
2	adult	0.23256	3.79269	0.26215	3.99475	0.20245	3.74488	0.28847	3.71956	0.25932	4.02322	0.30943	3.73732	0.28505	3.35296
2	adult	3.53941	0.50961	3.85375	0.56325	3.95048	0.51458	3.38251	0.50932	3.95481	0.52525	3.58509	0.53113	3.40724	0.49498
2	larve	3.73664	0.65899	4.06459	0.62463	3.81555	0.84019	3.71407	0.69829	4.1529	0.57443	3.83805	0.59424	3.94997	0.52128
2	larve	0.21646	3.71148	0.41257	3.69977	0.35323	3.66916	0.58296	3.60035	1.01611	0.74985	0.67418	3.52797	0.2239	3.34736
2	adult	3.54847	0.65637	3.71418	0.58448	3.57535	0.79548	3.69886	0.57641	3.94243	0.60676	3.63329	0.61375	3.58848	0.51809
2	adult	3.62598	0.64088	3.93015	0.62697	3.51521	0.76931	3.60147	0.5069	3.90678	0.57919	3.65143	0.63997	3.65627	0.50988
2	adult	1.71077	0.4989	3.58292	0.52309	1.77205	1.35172	2.18053	0.50219	2.41578	1.51139	0.35478	0.42363	1.22086	0.45208
2	adult	0.22766	3.80083	0.24559	3.90326	0.22169	3.74758	0.27361	3.79026	0.31525	3.91518	0.30475	3.77378	0.22862	3.71663
2	adult	0.21468	3.64292	0.24265	3.67754	0.21646	3.89656	0.21235	3.78055	0.27715	3.9909	0.27	3.69915	0.20743	3.61109
2	adult	0.22451	3.76734	2.1845	2.70794	1.84135	2.76512	0.2635	3.80345	0.27301	3.27685	1.91695	2.36871	0.2607	3.60592
2	larve	3.95479	0.65034	4.10769	0.69097	3.95103	0.84917	4.10471	0.55536	4.13022	0.55384	4.02778	0.67368	3.99918	0.51621
2	larve	2.38906	2.32009	2.95773	2.40397	2.63977	2.44596	2.3588	2.48174	1.43404	1.05204	2.5328	2.44962	2.31707	2.30673
2	adult	3.64374	0.6166	3.8775	0.63061	3.75319	0.77306	3.41529	0.59403	3.73067	0.71053	3.83546	0.74746	3.64255	0.5362
2	adult	3.32537	0.56641	3.59507	0.58737	3.39556	0.60308	3.55901	0.57273	3.82486	0.53874	3.27997	0.5776	3.35192	0.52693
2	adult	3.54569	0.52959	3.85484	0.56238	3.88565	0.64365	3.59138	0.57611	3.88833	0.53234	3.6865	0.6245	3.61947	0.51191
2	adult	0.23124	3.97556	0.23769	3.96436	0.21276	4.12452	0.29395	3.88744	0.26754	3.92473	0.2883	3.68579	0.23492	3.97757
2	adult	3.09202	0.50201	3.6364	0.5065	3.50454	0.49814	3.05416	0.5399	3.84012	0.45631	2.9907	0.53447	3.09129	0.45219
2	adult	3.51101	0.53183	3.99774	0.60175	3.86732	0.66049	3.78433	0.57357	4.00666	0.52924	3.66587	0.55586	3.44986	0.47274
2	larve	3.75776	0.67043	4.24027	0.68943	3.975	0.76188	3.58608	0.88469	4.31737	0.62865	3.83443	0.68781	3.97665	0.50085
2	larve	0.24938	3.73623	0.49152	3.78558	0.21488	3.83911	0.61519	3.69815	0.55244	2.33471	0.69516	3.57202	0.23402	3.22949
2	adult	3.3126	0.57921	3.93905	0.53565	3.64788	0.74581	3.11589	0.6982	3.96565	0.49588	3.48296	0.57201	3.31301	0.52162
2	adult	3.56707	0.63028	3.90396	0.60537	3.74356	0.82828	3.56656	0.67577	4.038	0.50699	3.78693	0.65338	3.89541	0.50722
2	adult	3.54157	0.60689	3.92216	0.60377	3.73383	0.7139	3.73644	0.52065	3.97636	0.55283	3.57232	0.68393	3.99302	0.5395
2	adult	0.28292	3.14562	0.24445	3.75614	0.20852	3.50008	0.21951	3.67701	0.24006	3.73986	0.25921	2.50844	0.24564	3.14697
2	adult	0.22436	3.55979	0.23606	3.71159	0.19796	3.99173	0.20551	3.75474	0.27085	3.71486	0.44686	3.33088	0.20992	3.55144
2	adult	0.20412	3.52661	0.24943	3.84464	0.19276	3.95554	0.31008	3.73421	0.26516	3.83889	0.31239	3.81966	0.21968	3.52628
2	larve	1.50841	2.68599	2.26389	2.84397	2.46876	2.41775	1.56914	3.25248	2.70903	2.47696	1.45111	2.83576	1.65283	2.48346
2	larve	0.23398	3.66493	0.43223	3.56298	0.29911	3.85906	0.62492	3.73992	0.32827	3.47723	0.72319	3.84906	0.27589	3.68395
2	adult	3.68528	0.7102	4.03964	0.64646	3.78887	0.83107	3.68088	0.76663	3.83626	0.57696	3.95503	0.64962	3.75535	0.51762
2	adult	3.82592	0.62363	3.84255	0.60707	3.69918	0.74727	3.79573	0.56347	3.94966	0.52431	3.72469	0.6482	3.93216	0.61629
2	adult	0.19796	3.6461	2.62721	2.07123	0.18946	3.87932	1.30976	2.34202	0.31425	3.88627	1.27869	2.66868	0.20149	3.70241
2	adult	3.93032	0.62076	4.12564	0.67825	4.0589	0.77954	3.8321	0.57192	4.10282	0.52444	3.92763	0.63952	3.75628	0.50756
2	adult	0.22644	3.54482	0.24018	3.98848	0.18736	3.89855	0.24086	3.72838	0.23817	3.94836	0.23767	3.7423	0.22194	3.76709
2	adult	0.21311	3.60177	0.25633	3.84686	0.19113	3.95082	0.23904	3.84512	0.28788	3.84556	0.3479	3.62827	0.2266	3.71059
2	larve	0.20165	3.72899	0.31654	3.75536	0.20151	3.98971	0.29701	3.61669	0.30752	3.71661	0.41683	3.51137	0.22226	3.62023
2	larve	3.69314	0.68015	4.01372	0.69152	3.8948	0.94463	3.9308	0.63104	4.1391	0.52562	4.01362	0.74607	3.8665	0.50968
2	adult	3.68373	0.71682	3.97804	0.63797	3.74106	0.84408	3.68199	0.56347	3.99676	0.55231	3.73782	0.61552	3.96105	0.59532
2	adult	3.62479	0.55055	3.91155	0.51219	3.9525	0.59411	3.63372	0.56926	3.79202	0.54144	3.66904	0.60083	2.49602	0.53797
2	adult	0.21533	3.76236	0.23131	3.90744	0.18743	3.72388	0.25968	3.7827	0.24994	3.86861	0.29015	3.81214	0.21187	3.94974
2	adult	1.14262	0.51868	2.68018	0.48166	2.67902	0.46947	2.62858	0.49558	3.49174	0.43916	2.07921	0.49761	2.15032	0.43469
2	adult	0.21608	3.83479	0.24521	3.82224	0.18203	3.92412	0.29407	3.75336	0.27346	3.96089	0.37197	3.83509	0.19091	3.75352
2	adult	0.1916	3.68138	0.26549	3.79197	0.18189	3.757	0.2376	3.86051	0.28027	3.75518	0.33409	3.87371	0.20189	3.68099
2	larve	3.77104	0.53478	4.07196	0.56566	4.09297	0.66436	3.69476	0.85345	3.97348	0.74343	3.95501	0.62368	0.76719	1.55548
2	larve	3.91157	0.64023	4.01947	0.70357	4.04029	0.97787	3.99303	0.75227	4.09024	0.48718	3.93404	0.66891	3.92217	0.59731
2	adult	3.59242	0.66849	3.86787	0.62631	3.74648	0.8265	3.29383	1.20509	4.11801	0.628	3.85751	0.7041	3.88003	0.57392
2	adult	3.78581	0.54809	3.9717	0.57534	3.9772	0.58587	3.8483	0.58085	4.10543	0.59913	3.9227	0.68637	3.73682	0.56086
2	adult	3.86995	0.52405	3.9745	0.53825	4.02739	0.57492	3.66975	0.59799	4.10187	0.50082	3.78714	0.67057	3.61227	0.48387
2	adult	3.79793	0.58766	3.94168	0.61036	3.95231	0.61724	3.8397	0.58783	3.99431	0.54419	3.75317	0.65527	3.85773	0.54795
2	adult	0.21643	3.71557	0.2538	3.9987	0.20253	4.10611	0.29402	3.76359	0.28547	3.94957	0.38104	3.62897	0.20776	3.94163
2	larve	0.19217	3.72948	0.26263	3.81662	0.18821	3.99972	0.3961	3.83652	0.31497	3.8889	0.40182	3.66686	0.20973	3.8166
2	larve	0.27419	3.54104	0.29189	3.97603	0.18546	3.84564	0.40988	3.83879	0.28907	3.79341	0.43051	3.82911	0.20312	3.55253
2	larve	3.76635	0.66436	3.8084	0.80821	3.85624	0.77583	3.87902	0.94644	0.9831	1.56206	4.04393	0.63173	3.99288	0.55175
2	adult	3.57456	0.86508	3.92115	0.76393	3.65798	0.97325	2.97175	1.87442	3.88625	0.5761	3.35952	1.03627	3.77409	0.50633
2	adult	3.46989	0.62705	3.83779	0.52992	3.63598	0.6334	3.43371	0.54292	2.21893	2.62786	2.9333	0.57383	1.71178	0.5153
2	adult	3.49264	0.56922	4.04816	0.60291	3.67037	0.67342	2.96278	0.96966	3.94717	0.54529	3.72957	0.62789	3.60658	0.4972
2	adult	0.19909	3.87606	0.27002	4.00077	0.18746	4.0174	0.2892	3.91538	0.3246	3.83776	0.39659	3.70355	0.19173	3.87174
2	adult	0.25433	3.57424	0.30197	3.88571	0.22365	3.68384	0.28547	3.74923	0.28927	3.8103	0.31188	3.59785	0.25426	3.50804
2	larve	0.21029	3.81656	0.27284	3.81985	0.20061	3.93088	0.47962	3.8155	0.33201	3.88259	0.44625	3.76728	0.2117	3.73283
2	larve	3.89242	0.70007	4.11853	0.62833	3.93097	0.77437	3.85538	0.55031	4.20165	0.5292	3.92943	0.62449	3.95701	0.71693
2	larve	3.7437	0.67013	4.08578	0.72501	3.84694	0.94411	4.10254	0.66557	4.16251	0.61336	3.92239	0.64713	3.91644	0.55707
2	adult	3.51549	0.64707	3.95279	0.58486	3.87522	0.76801	3.73139	0.56905	4.04356	0.56256	3.40337	0.7206	3.67766	0.48241
2	adult	3.58291	0.56401	4.0264	0.62061	3.63429	0.64354	3.37793	0.67536	4.005	0.5232	3.72605	0.63682	3.53175	0.52636
2	adult	0.24112	3.80088	0.29608	4.03201	0.21313	3.95213	0.32967	3.91964	0.29724	3.8023	0.36616	3.63733	0.24763	3.82977
2	adult	0.2232	3.39756	0.21598	3.85888	0.21011	3.83829	0.22439	3.76188	0.21935	3.37392	0.26476	3.29483	0.21952	3.56636
2	adult	0.24976	3.11902	0.25531	3.7405	0.21298	3.87858	0.27205	3.71185	0.25042	3.8134	0.25929	3.45494	0.22949	3.23458
2	larve	0.58546	3.53757	1.22625	3.34811	0.43358	3.76081	0.31888	3.89338	0.37424	3.60243	0.58007	4.04176	0.21443	3.48379
2	larve	3.83577	0.58739	4.21485	0.67911	3.8699	0.85109	4.02026	0.58971	4.05246	0.53312	3.90996	0.7689	3.96257	0.50757
2	larve	3.82654	0.67997	4.14268	0.83396	3.8395	1.03725	4.0597	0.68585	4.12865	0.56243	3.96621	0.67101	3.98349	0.5619
2	larve	0.23229	3.89924	0.38499	3.88654	0.19896	3.72751	0.57157	3.71566	0.44046	3.85637	0.69095	3.54769	0.24115	3.82135
2	larve	3.54533	0.99145	4.1466	0.64987	3.85531	0.82262	4.0512	0.61321	4.13466	0.57062	3.81095	0.69389	4.13775	0.60755
2	larve	4.04645	0.70879	3.99609	0.65801	3.90734	0.79091	3.92317	0.57615	4.06894	0.56083	3.99188	0.73731	4.00294	0.57304
2	larve	0.19969	3.90733	0.36967	3.91118	0.20872	3.98207	0.44019	4.02147	0.32199	3.80718	0.49306	3.74459	0.20615	3.90232
2	larve	3.8656	0.71427	3.96221	0.74956	3.93441	0.85305	3.75617	0.78458	4.18868	0.68876	3.8569	0.66088	4.0338	0.59166
2	larve	3.56826	0.57599	4.04974	0.64627	3.91298	0.66088	3.68574	0.52687	4.03426	0.54105	3.30518	0.78347	3.76425	0.47697
2	larve	0.19165	3.74819	0.243	3.94522	0.18653	3.94677	0.21999	3.75258	0.38543	3.79318	0.36197	3.61611	0.18162	3.73231
2	larve	3.36595	0.58431	4.10472	0.64902	3.76598	0.77373	3.86498	0.56461	0.99601	0.74988	3.83845	0.5847	3.67553	0.44928
2	larve	2.57913	2.33363	2.85462	2.44047	2.86726	2.25378	2.43275	2.63537	3.0668	2.27867	2.34314	2.64047	2.42308	2.25083
2	larve	3.71865	0.71535	3.89133	0.69555	3.70425	0.77583	3.93045	0.56905	3.96803	0.60747	3.87191	0.68571	3.8422	0.61932
2	larve	2.41743	2.03507	2.90363	1.96324	2.55556	2.29561	2.02109	2.58532	2.80038	2.23638	1.83126	2.33522	1.99847	2.40197
2	larve	3.72304	0.78308	3.93627	0.65943	3.90397	0.69754	3.82563	0.55757	4.02957	0.52702	3.84205	0.6357	3.85625	0.52766
2	larve	3.97016	0.60685	3.97927	0.64876	3.86126	0.77939	3.92848	0.55929	4.07142	0.55891	3.93133	0.62832	3.82531	0.54368
2	larve	2.3182	2.43699	2.62884	2.41445	2.53209	2.45228	2.12571	2.8647	2.84838	2.22071	2.14426	2.42337	2.09101	2.20044
2	larve	3.5753	0.57417	3.97758	0.6409	3.88126	0.71228	3.61232	0.59058	4.10931	0.52466	3.66278	0.57323	3.95249	0.57413
2	larve	0.72673	3.48691	0.96022	3.59894	0.91514	3.29389	1.21451	3.20152	1.10795	1.07352	1.14095	3.00989	1.01799	3.10582
2	larve	0.19865	3.86186	0.23093	3.28042	0.18788	3.88544	0.29664	3.75106	1.0891	3.46032	0.59272	3.53567	0.40187	3.56801
2	larve	4.00839	0.60424	4.10136	0.61078	4.0629	0.75509	3.88309	0.54716	4.15078	0.59538	3.92398	0.68693	4.09323	0.52862
2	larve	0.20612	3.82071	0.2461	3.82638	0.43938	3.47663	0.32021	3.75205	0.65722	3.51873	0.55826	3.54525	0.19538	3.7592
2	larve	0.32139	3.81229	0.26841	3.9392	0.4792	3.75031	0.42863	3.85623	0.30363	3.85815	0.43853	3.76411	0.4074	0.84268
2	larve	3.97191	0.61295	3.94895	0.61631	4.05679	0.75847	3.77305	0.51206	4.01855	0.56841	3.88225	0.76488	3.8673	0.53735
2	larve	0.34443	3.63995	0.26	3.8257	0.18245	3.77522	0.24564	3.77038	0.37107	3.85623	0.36448	3.58411	0.19378	3.59353
2	larve	0.1895	3.61093	0.18612	3.77885	1.177	3.24437	0.19821	3.83882	0.26895	3.62032	0.29813	3.30548	0.21124	4.06212
2	larve	3.7267	0.66271	4.1478	0.74471	3.85786	0.92546	3.89751	0.61445	1.14435	0.78883	3.9196	0.7284	3.93243	0.5415
2	larve	3.67272	0.72367	4.04059	0.69408	3.73015	1.03575	4.04868	0.59469	3.92491	0.67609	3.88628	0.80124	3.83026	0.59313
2	larve	3.68334	0.7105	3.86753	0.63447	3.90192	0.83395	3.59637	0.95215	3.92529	0.5739	3.78959	0.71684	3.55813	0.64526
2	larve	3.46414	0.8566	3.80172	0.82819	3.81698	0.79226	3.83236	0.52504	4.04445	0.57261	3.80163	0.62184	3.90441	0.50547
2	larve	3.78474	0.64017	3.96402	0.6215	3.80639	0.77569	3.5913	0.51778	3.99441	0.55366	3.89439	0.6037	3.76336	0.54902
2	larve	3.42226	0.68889	4.00546	0.73104	3.95606	0.73178	3.3197	1.0378	4.1107	0.5653	3.9968	0.62991	3.76831	0.52149
2	larve	3.45087	0.75682	3.79228	0.89766	3.86539	0.78199	3.7927	0.58161	4.0508	0.53426	3.75253	0.53277	3.42861	0.81541
2	larve	3.37952	0.78979	2.27644	2.56756	2.87191	2.00844	1.04271	2.82128	4.10928	0.52734	1.69389	2.29108	1.5108	2.57708
2	larve	0.19476	3.4105	0.22632	3.53637	0.18359	3.69713	0.28798	3.62989	1.38036	0.9388	0.30556	3.47814	0.21398	3.48192
2	larve	0.23116	3.42381	0.58107	3.72281	0.18792	3.67101	0.56047	3.73384	0.4736	3.77403	0.75256	3.30216	0.56177	3.53188
2	larve	3.73471	0.78046	3.92717	0.5803	3.79476	0.74523	3.80192	0.60046	3.95071	0.5189	3.84335	0.63811	3.82507	0.53594
2	larve	3.51185	0.64298	3.84401	0.64929	3.75445	0.95522	3.81111	0.67822	3.7682	0.6781	3.79153	0.63353	3.88243	0.50455
2	larve	3.87802	0.57376	3.99181	0.66497	3.94673	0.7408	3.78198	0.56838	4.19301	0.53487	3.89531	0.58811	3.8749	0.51782
2	larve	0.28308	3.70936	0.28025	3.77304	0.19465	4.07669	0.34254	3.80168	0.32851	3.85151	0.41108	3.62289	0.24177	3.82156
2	larve	2.15353	2.20308	2.69197	2.54035	2.66625	2.07487	1.69917	2.71192	3.50557	1.48208	1.74131	2.46648	1.77056	2.41371
2	larve	3.67324	0.74957	4.15992	0.5555	3.83174	0.69634	3.61524	0.56062	4.1476	0.53162	3.60171	0.59342	3.64244	0.47804
2	larve	0.41216	3.59182	0.39805	3.66849	0.61612	3.76556	0.43081	3.63249	0.66404	2.11639	0.55873	3.63148	0.22762	3.65926
2	larve	0.32075	3.60796	0.30797	3.88818	0.2064	3.94063	0.36094	3.82283	0.32369	3.09834	0.50513	3.67874	0.32006	3.63999
2	larve	0.27865	3.86388	0.50177	3.91433	0.32852	3.77745	0.46257	3.73437	0.50114	3.71797	0.52851	3.51851	0.2704	3.82794
2	larve	3.81459	0.67377	4.17158	0.66189	3.90057	0.84361	3.84831	0.55724	4.16464	0.52937	3.65374	0.87569	3.88947	0.56143
2	larve	3.73065	0.57606	4.13555	0.63061	3.98865	0.72147	3.99442	0.57491	4.19	0.56449	4.06979	0.65576	3.97199	0.57515
2	larve	0.26024	3.72582	0.3071	4.08801	0.60052	3.64709	0.30926	3.67707	0.31449	3.81444	0.62513	3.55159	0.3596	3.57192
2	larve	3.85797	0.64103	4.10578	0.70233	4.13762	0.74849	3.94816	0.62363	4.11573	0.53214	3.88548	0.64094	3.89199	0.54658
2	larve	1.94266	2.57942	2.80785	2.59284	2.83569	1.98082	1.07446	3.31228	3.26436	1.72708	1.86157	2.44173	2.44819	1.83789
2	larve	0.81053	3.52296	0.73249	3.4894	0.93348	3.31605	1.02809	3.32957	0.76595	3.05682	0.81087	3.68803	0.49601	3.52732
2	larve	0.21364	3.82435	0.27202	3.76249	0.20921	3.92573	0.29954	3.77818	0.43859	3.59426	0.49564	3.62021	0.22244	3.81639
2	larve	0.25691	3.67103	0.36593	3.69572	0.41627	3.80044	0.36403	3.63807	0.31892	3.81372	0.50424	3.47887	0.25118	3.60154
2	larve	3.81393	0.60542	4.12226	0.62117	3.9367	0.70776	3.89752	0.57422	4.06544	0.57068	3.73787	0.58989	3.97328	0.51117
2	larve	3.79992	0.61848	4.24828	0.70628	3.81921	0.75217	3.59407	0.61248	3.91414	0.49586	3.95238	0.63149	3.84152	0.49082
2	larve	3.58023	0.6381	4.04502	0.64625	4.05046	0.74415	3.62179	0.50388	4.17874	0.54824	3.9248	0.61504	3.87881	0.50213
2	larve	2.75116	1.30502	2.17467	3.04417	3.29244	1.54357	1.92075	2.39449	3.12753	1.92596	2.19879	1.897	1.91048	2.09914
2	larve	3.69798	0.61296	4.09667	0.63685	4.03259	0.77826	4.00146	0.57026	4.19515	0.55733	4.06	0.65064	3.95788	0.50096
2	larve	0.21943	3.76445	0.37579	3.79263	0.53427	3.67707	0.58451	3.53645	0.38024	3.76385	0.59595	3.58844	0.23696	3.90079
2	larve	3.86297	0.65348	3.93882	0.66577	3.89019	0.82054	3.93662	0.53903	4.02593	0.58045	4.02592	0.66358	3.9432	0.55753
2	larve	3.68529	0.60283	4.02487	0.65848	3.80269	0.85253	3.82785	0.54683	4.07197	0.59504	3.68366	0.75226	3.90076	0.61494
2	larve	3.83689	0.56746	3.85371	0.6044	3.89054	0.69423	3.90683	0.52617	4.2477	0.54345	3.95328	0.63776	3.86029	0.51162
2	larve	0.22965	3.77424	0.26882	4.092	0.19234	3.94906	0.34941	3.8755	0.29851	4.35564	0.41852	3.68307	0.21974	3.94947
2	larve	2.23531	2.19338	2.99115	2.26127	2.63885	2.28953	1.91041	2.94989	3.0038	2.06855	1.90728	2.67575	2.31483	2.1174
2	larve	0.18308	3.74407	0.26925	3.99448	0.17441	3.8362	0.23408	3.8449	1.65993	2.97476	0.33572	3.60898	0.18339	3.66641
2	larve	3.85627	0.64283	4.21871	0.75072	4.1097	0.82139	3.51681	0.82528	3.69056	0.51129	3.93265	0.70768	4.15448	0.64442
2	larve	0.20996	3.64464	0.38937	3.79452	0.57735	3.66674	0.44983	3.75813	0.35987	3.38384	0.66908	3.36365	0.55929	1.02376
2	larve	0.22087	3.83152	0.3084	2.69032	0.27125	3.76496	0.41728	3.89806	0.68961	3.69927	0.57341	3.78828	0.19796	3.59226
2	larve	0.26774	0.45882	0.29481	0.41346	0.2659	0.42548	0.19048	3.03466	0.37404	0.46583	0.2756	0.4231	0.36586	0.47088
2	larve	3.75941	0.63942	3.808	0.64893	3.77808	0.69064	3.92796	0.54462	4.17289	0.5464	3.88544	0.61379	3.90716	0.5069
2	larve	0.19046	3.84284	0.26666	3.88795	0.31786	3.95941	0.29623	3.97869	0.48182	3.77882	0.4357	3.62657	0.1851	3.98272
2	larve	3.57653	0.59376	3.99468	0.55441	3.81982	0.66868	3.41923	0.50207	4.16792	0.52927	3.87359	0.58493	3.76491	0.52357
2	larve	3.83369	0.64541	4.10741	0.63043	4.15479	0.74529	3.95673	0.54543	4.13043	0.5074	3.88638	0.68176	4.14673	0.56442
2	larve	0.22452	3.66448	0.43547	4.0461	0.18729	3.97947	0.37799	3.73771	0.63875	3.56253	0.37848	3.79192	0.2118	3.84399
2	larve	0.21983	3.6905	0.40836	3.63093	0.23106	3.57338	0.53827	3.68045	0.3862	3.7914	0.46208	3.25036	0.24364	3.67891
2	larve	3.70891	0.73133	4.02403	0.69113	3.86123	0.93427	3.67576	0.96754	3.95551	0.5666	3.6228	0.74693	3.83419	0.58353
2	larve	3.92713	0.60536	4.06145	0.65072	3.94626	0.88268	3.60625	0.86247	4.06443	0.5864	3.84029	0.69062	3.77033	0.59732
2	larve	3.90305	0.6403	4.05825	0.60287	3.99006	0.71147	3.86414	0.54983	4.13883	0.55053	4.01438	0.65296	4.00945	0.57292
2	larve	0.2063	3.98387	0.29106	3.82113	0.23091	3.76903	0.33628	3.74458	0.26996	4.19328	0.39047	3.68979	0.20881	3.93681
2	larve	0.20107	3.85467	0.31261	3.58646	0.16909	3.72235	0.2844	3.77793	0.32294	4.05369	0.4105	3.83461	0.20558	3.89524
2	larve	3.92376	0.64405	4.10322	0.62893	3.90487	0.72116	3.83513	0.53208	4.08008	0.57366	3.9433	0.64006	3.83144	0.50048
2	larve	0.23346	3.69856	0.3095	3.7126	0.1789	3.90637	0.33612	3.98057	0.31249	3.75168	0.41127	3.73381	0.21261	3.91307
2	larve	3.65639	0.66069	4.00025	0.65631	3.84978	0.85996	3.69244	0.90939	4.05463	0.5584	3.45726	0.85151	3.74212	0.50013
2	larve	0.26694	3.93209	0.33643	3.86331	0.20535	3.89977	0.41622	3.90591	0.43055	3.92006	0.52433	3.56598	0.21459	3.68387
2	larve	3.79732	0.62044	4.0748	0.65896	3.94914	0.8393	3.95212	0.53587	4.0481	0.52477	3.86001	0.62356	3.97587	0.53609
2	larve	3.80232	0.60966	4.18821	0.66451	0.61958	1.07276	3.9739	0.57338	4.12498	0.57148	3.86612	0.67331	0.50302	1.01117
2	larve	3.93109	0.66236	4.25382	0.68417	4.11327	0.81955	3.82939	0.80552	4.2291	0.5997	4.03832	0.74361	3.78952	0.5323
2	larve	0.2016	3.73741	0.31404	3.91681	0.17417	3.93986	0.44504	3.89384	0.34649	3.87596	0.44809	3.69268	0.21834	3.91566
2	larve	0.18436	3.55959	0.31249	3.94556	0.17101	3.92167	0.33232	3.74498	0.32866	3.77183	0.47369	3.55497	0.21113	3.7462
2	larve	0.19784	4.02115	0.29148	3.83842	0.17942	4.08497	0.34855	3.85646	0.332	3.91682	0.44443	3.86451	0.19809	3.69804
2	larve	0.23034	3.53456	0.38965	3.7803	0.2231	3.8402	0.65007	3.78674	0.42566	3.78227	0.65281	3.76459	0.24568	3.54739
2	larve	4.02024	0.74492	3.97566	0.65126	3.6727	0.96102	4.0053	0.597	3.89791	0.61226	3.7554	0.70095	3.84776	0.53751
2	larve	3.94687	0.52928	3.90346	0.5846	3.91974	0.67163	3.86267	0.63398	4.06169	0.57186	4.01953	0.70137	4.02388	0.52494
2	larve	0.25283	3.81894	0.36835	3.93127	0.2971	3.7764	0.55193	3.68858	0.43119	3.788	0.59335	3.70585	0.2691	3.72987
2	larve	3.77792	0.70326	4.02857	0.76096	3.73068	0.96603	3.83018	0.7841	4.05343	0.58765	3.82463	0.85312	3.84979	0.66703
2	larve	3.65935	0.61034	3.99497	0.70206	3.92636	0.91681	4.01486	0.57456	4.10783	0.57743	3.80834	0.64095	3.85001	0.58796
2	larve	0.1968	3.59046	0.30246	3.79563	0.18868	3.90481	0.49604	3.66263	0.41026	3.66323	0.59477	3.45852	0.20873	3.64272
2	larve	3.70617	0.69388	3.79178	0.76185	3.70291	0.74582	2.75394	1.20022	4.09508	0.54575	3.22995	0.96672	4.07886	0.56885
2	larve	0.22647	3.50701	0.36662	3.60979	0.74679	3.45	0.93389	3.46421	0.4781	3.77006	0.61795	3.61035	0.24723	3.74852
2	larve	3.84526	0.88439	3.84466	0.85169	3.63133	1.19804	3.90649	0.80754	3.94534	0.64228	3.84518	0.75759	3.97215	0.62289
2	larve	3.77353	0.63255	4.1276	0.69714	3.91137	0.79348	4.05333	0.59475	4.28366	0.56029	4.06663	0.64543	4.06374	0.61962
2	larve	0.19648	3.78847	0.24593	3.77886	0.17368	3.7427	0.5028	3.73613	0.40639	3.67397	0.5205	3.58455	0.21202	3.6255
2	larve	4.01541	0.56327	4.0022	0.57632	3.99278	0.68198	3.96152	0.68924	4.21315	0.53256	3.49804	0.85994	3.73883	0.49453
2	adult	3.8789	0.64018	4.02667	0.67925	3.89751	0.71356	3.87604	0.5688	4.07691	0.51069	4.01375	0.60246	4.0853	0.59831
2	adult	0.17818	3.59316	0.70028	3.69126	0.17435	3.88131	0.20587	3.70501	0.66164	3.72335	0.35245	3.53301	0.25167	3.62685
2	adult	0.19747	3.90976	0.37065	3.93062	0.21329	3.80158	0.38409	3.72965	0.34695	3.99645	0.38929	4.34878	0.20775	3.8767
2	adult	0.20577	3.78153	0.29723	3.91783	0.1845	3.9869	0.28162	3.81632	0.40013	3.77124	0.61224	3.41714	0.36306	3.40116
2	larve	0.23321	3.83668	0.35574	3.6806	0.21049	3.91168	0.30434	3.6843	0.51681	3.69338	0.67123	3.25784	0.24452	3.95241
2	larve	0.21138	3.69599	0.23075	3.93737	0.18004	3.90602	0.23918	3.71781	0.4307	3.79153	0.61863	3.25319	0.21351	3.74403
2	larve	2.08319	2.52452	2.23595	2.76147	2.31787	2.61597	1.84744	3.04449	2.4671	2.4765	1.47445	2.91857	1.73884	2.68266
2	adult	3.84052	0.59035	4.12598	0.68443	3.8128	0.73091	3.83638	0.64242	4.10912	0.51632	3.84191	0.63289	4.04631	0.52552
2	adult	3.79718	0.59401	4.03035	0.63529	4.15031	0.69676	3.8926	0.56897	4.12755	0.54166	3.90331	0.6511	3.99636	0.50162
2	adult	0.19035	3.71894	0.28618	3.74793	0.16213	3.67868	0.24383	3.86103	0.33802	3.65747	0.44371	3.71857	0.19277	4.00305
2	adult	0.18174	3.7032	0.29508	3.80183	0.18002	3.8815	0.23846	3.71673	0.36863	3.78555	0.48227	3.4939	0.20034	3.95723
2	adult	1.4491	3.02857	2.69015	2.58171	2.26268	2.75775	1.85375	3.0147	2.44399	2.53726	1.74841	2.70649	1.19889	3.28915
2	larve	3.70595	0.86779	4.02674	0.7762	3.55095	1.07285	3.92653	0.6168	3.87106	0.72218	3.84561	0.73011	3.84658	0.60278
2	larve	0.20931	3.72427	0.21819	3.90788	0.21836	3.8765	0.33638	3.83417	0.36949	3.8131	0.5376	3.73745	0.23053	3.78715
2	larve	0.21535	3.78806	0.19592	3.72856	0.16509	3.89885	0.45463	2.87634	0.35724	3.90571	0.35255	3.80796	0.19609	3.87312
2	adult	3.855	0.56603	3.94856	0.58111	3.82556	0.69085	3.97896	0.54977	3.90091	0.49195	3.88938	0.65081	3.91222	0.57102
2	adult	3.81457	0.62371	3.90223	0.55694	4.05158	0.75353	3.90697	0.58055	4.09884	0.54464	3.85795	0.60702	3.87589	0.55207
2	adult	0.20923	3.7444	0.29167	3.76559	0.17828	3.81491	0.32599	3.5598	0.36011	3.9426	0.32858	3.83277	0.17715	3.88278
2	adult	0.17539	3.65275	0.26333	3.58379	0.17475	3.72989	0.2694	3.93991	0.3412	3.76267	0.41428	3.76965	0.19349	3.80047
2	adult	1.98749	2.40209	2.88638	2.29922	2.78051	2.18474	2.09752	2.94715	2.80238	2.1026	1.9708	2.69613	2.04803	2.35415
2	larve	3.752	0.80266	3.90146	0.76288	3.64274	1.08943	3.98116	0.61872	4.03311	0.64242	3.78974	0.72637	4.00174	0.55998
2	larve	3.62369	0.67232	3.86353	0.66081	3.78532	0.86384	0.60215	0.45096	4.02883	0.57213	3.97755	0.67181	3.77602	0.55963
2	larve	0.22103	3.72207	0.24432	3.90446	0.44756	3.59395	0.47853	3.7774	0.95479	3.49391	0.47717	3.51005	0.21082	3.73209
2	adult	3.77758	0.67763	3.92492	0.65299	4.04704	0.82023	3.84917	0.54551	4.1006	0.58406	3.76933	0.59552	3.85862	0.51155
2	adult	3.75239	0.62332	4.06965	0.81357	4.04432	0.74065	3.84656	0.53289	3.66066	1.14194	3.86106	0.58786	3.92345	0.52367
2	adult	0.18629	3.61598	0.22456	3.8241	0.16315	3.84251	0.19868	3.81403	0.34443	3.81048	0.37134	3.56651	0.19113	3.88953
2	adult	0.18396	3.71885	0.56703	3.76988	0.17426	3.84579	0.22577	3.65961	0.94562	3.47576	0.63228	3.61705	0.57421	3.18963
2	adult	2.27189	2.47315	2.95383	2.33276	2.88534	1.99601	2.14789	2.86236	2.96191	1.99436	1.99321	2.55839	2.17234	2.34602
2	larve	0.51747	1.33215	3.50376	0.55665	3.32028	0.91029	2.63831	0.49072	3.88185	0.49044	1.31788	0.47571	3.52688	0.48943
2	larve	3.8106	0.72198	3.90713	0.68039	3.67721	0.9006	3.64892	0.64981	3.93338	0.57348	3.68522	0.79118	4.0169	0.52604
2	larve	3.58844	0.69985	3.94068	0.64313	3.70206	0.77492	3.64726	0.58667	4.31655	0.55368	3.7326	0.63118	3.86967	0.55109
2	adult	3.69621	0.6464	4.06756	0.69502	3.6816	0.9595	3.74498	0.51633	4.12778	0.55402	3.46385	0.71194	4.01174	0.58389
2	adult	3.5807	0.60818	3.88357	0.62974	3.82035	0.67087	3.56927	0.70762	3.35319	1.96765	0.46814	0.44068	4.00995	0.58789
2	adult	0.19694	3.86325	0.22304	3.7066	0.16612	3.713	0.34638	3.4515	0.31832	3.68687	0.29218	3.49935	0.18333	3.99911
2	adult	0.19436	3.76692	0.27755	3.9561	0.19175	3.91596	0.29835	3.83434	0.34931	3.78204	0.41748	3.78691	0.19861	3.7045
2	adult	1.835	2.60077	3.09141	2.23061	2.51431	2.25569	2.28993	2.65437	2.78949	2.11409	1.93272	2.63255	2.14365	2.14103
2	larve	3.70708	0.83315	3.70824	0.68413	3.65086	0.97011	3.79163	0.63074	4.15796	0.62893	3.78828	0.68926	3.8267	0.53805
2	larve	0.30496	3.7773	0.42541	3.71866	0.30773	4.05291	0.34325	3.88237	0.54438	3.65919	0.42505	3.8506	0.28479	3.87297
2	larve	3.59749	0.62834	3.82744	0.66438	3.90915	0.80924	3.78074	0.63626	4.03578	0.54106	3.84838	0.65327	3.83778	0.53551
2	adult	3.87155	0.6251	4.08364	0.67091	3.83781	0.76442	3.85774	0.58674	3.63895	1.05084	4.01782	0.66897	3.94698	0.56098
2	adult	3.61631	0.58512	4.16736	0.63962	4.14037	0.75025	3.86823	0.57727	4.21588	0.53901	3.90894	0.60232	3.73797	0.49517
2	adult	0.1856	3.68283	0.23562	3.92378	0.1767	3.92246	0.35002	3.45639	0.32841	3.60078	0.34145	3.30568	0.1777	3.59037
2	adult	0.19858	3.70054	0.48607	3.55782	0.17152	3.84644	0.24915	3.9088	0.32086	3.58945	0.50428	3.56063	1.0105	3.21842
2	adult	2.19573	2.18258	2.63782	2.06371	2.76282	2.37391	2.19675	2.7661	2.92852	2.0957	1.48806	2.01649	0.46668	1.33614
2	larve	0.24686	3.79591	0.37245	3.79742	0.20181	3.66956	0.66704	3.64373	0.42804	3.85492	0.7351	3.40255	0.30209	3.52333
2	larve	0.18898	3.62688	0.89213	3.49066	0.18372	3.8612	0.2283	3.64778	0.34992	3.8226	0.43677	3.76978	0.19004	3.75713
2	larve	3.72245	0.64912	4.04506	0.58636	3.74133	0.75782	3.60535	0.55468	4.04779	0.51587	3.75018	0.67053	3.84731	0.51624
2	adult	3.8828	0.60905	4.03817	0.67655	3.85945	0.7474	3.76837	0.54786	4.0135	0.53722	3.85842	0.62064	4.13502	0.55067
2	adult	3.80046	0.60635	3.97497	0.61282	3.89406	0.738	3.77781	0.55117	4.04041	0.58913	3.89374	0.60785	3.8982	0.49203
2	adult	0.19887	3.85827	0.45377	3.91146	0.15975	3.85778	0.24039	3.7511	0.31595	3.98075	0.35896	3.56422	0.30335	3.88368
2	adult	0.87091	3.03544	0.22393	3.84998	0.1703	3.64221	0.19759	3.78402	0.32198	3.72869	0.3179	3.68635	0.21593	3.85172
2	adult	2.15502	2.16954	3.18358	2.04817	2.92714	1.94351	2.1993	2.61094	2.76586	2.11956	2.01499	2.41702	2.28081	2.03761
2	larve	2.3606	2.3936	2.98092	2.16122	2.63616	2.20029	2.00746	2.83323	2.93943	2.17092	2.32173	2.17316	2.20116	2.29851
2	larve	2.44975	2.40998	2.94804	2.43459	2.70004	2.39638	2.18408	2.93741	2.96346	2.20873	2.438	2.43419	2.15308	2.65742
2	larve	3.68155	0.64618	3.78772	0.73589	3.82656	0.81322	2.88133	1.54392	3.95273	0.72253	3.74903	0.60173	3.34453	0.88179
2	adult	3.79278	0.61347	4.09352	0.61475	3.96698	0.79504	3.85099	0.54009	4.0284	0.54327	3.94559	0.55982	3.90133	0.51362
2	adult	0.20645	3.73258	0.23067	3.8381	0.16188	3.78701	0.24237	3.98245	0.32723	3.88266	0.42764	3.59692	0.40804	3.68216
2	adult	0.25734	3.79501	0.34572	3.69536	0.18353	3.88693	0.34547	3.81724	0.29807	4.02479	0.39937	3.9052	0.2112	4.24876
2	adult	0.18717	3.59439	0.29933	3.7799	0.17108	3.86027	0.22005	3.73188	0.31696	3.79868	0.40126	3.8549	0.20099	3.8118
2	adult	1.9906	2.63468	2.37827	2.63874	2.81302	2.11577	2.06343	2.91312	3.08176	1.82243	2.33172	2.83505	2.478	1.97418
2	larve	0.2238	3.85692	0.33743	3.89974	0.22606	3.73788	0.36583	3.78485	0.41555	4.01642	0.55118	3.56581	0.26402	3.73504
2	larve	0.20159	3.95685	0.28876	3.87439	0.217	3.95033	0.3609	4.05662	0.53297	1.46498	0.4442	3.78327	0.40477	1.57391
2	larve	0.19859	3.76125	0.58721	3.51517	1.97305	2.29867	0.98383	2.94278	0.23888	3.72828	0.48777	3.0206	1.39522	2.51804
2	adult	3.81803	0.65809	4.12249	0.61984	3.87977	0.71495	3.64076	0.5294	4.03776	0.54388	3.89053	0.61682	3.96214	0.54932
2	adult	0.20461	3.83341	0.30915	3.81996	0.17431	3.84506	0.27384	3.84546	0.29679	4.0205	0.40753	4.01757	0.20212	4.34327
2	adult	0.18983	3.68108	0.22196	3.90288	0.17439	3.96163	0.24634	4.08472	0.31982	3.95918	0.34798	3.48502	0.18766	3.85082
2	adult	0.17766	3.76634	0.23429	3.86896	0.17472	3.97012	0.22496	3.77201	0.30903	3.82719	0.37548	3.82211	0.19392	4.00559
2	adult	2.21755	2.20359	2.92738	2.16902	2.81659	1.76046	1.95612	2.79789	3.02203	1.86315	2.2053	2.33716	2.40815	2.1241
2	larve	0.25344	3.77567	0.36725	3.9356	0.26247	3.75801	0.41715	3.76784	0.40366	3.77169	0.60665	3.56412	0.21493	3.84883
2	larve	3.72814	0.7314	4.00862	0.61583	3.81424	0.87151	3.62183	0.93544	4.12634	0.6863	3.76088	0.66756	3.95684	0.60221
2	larve	3.24474	0.6382	3.53134	1.06074	3.58959	0.87913	2.14277	1.14538	3.82306	0.71337	3.71849	0.60795	3.71056	0.51018
2	adult	4.01257	0.56451	4.26213	0.59996	3.94885	0.73168	3.88238	0.54808	4.21899	0.49999	3.8162	0.58963	3.95018	0.53443
2	adult	0.19195	3.88689	0.25758	3.70341	0.18286	4.04494	0.27646	3.93737	0.30897	3.82245	0.3953	3.61155	0.29581	3.83272
2	adult	0.17175	3.75853	0.1986	3.79621	0.16315	3.7625	0.21759	3.73609	0.32634	3.87432	0.36837	3.70559	0.72175	3.24372
2	adult	0.17913	3.76328	0.46425	3.83927	0.17133	3.96702	0.41248	3.81387	0.31507	3.79182	0.48725	3.74405	0.19861	3.8275
2	adult	0.18618	3.55907	0.70728	3.85803	0.1687	3.90356	0.26052	3.86256	0.7344	3.68742	0.60275	3.54636	0.32452	3.79943
2	larve	2.0985	2.45974	2.30827	2.81394	2.46779	2.16757	2.2513	2.38785	1.83939	2.97587	2.44686	2.03471	1.87534	2.51834
2	larve	0.24021	4.00565	0.31351	3.78116	0.33692	3.8249	0.45964	3.83771	0.54167	3.78863	0.52095	3.62143	0.22382	3.87968
2	larve	0.30017	3.77075	0.5284	3.81904	0.20151	4.08116	0.38417	3.88825	0.7753	3.66723	0.579	3.34564	0.47727	3.53714
2	adult	4.07834	0.60005	4.08798	0.63293	4.103	0.78539	3.85551	0.53131	4.01555	0.53594	4.04232	0.69861	3.99651	0.56226
2	adult	0.18653	3.66883	0.20786	3.7712	0.1602	3.81498	0.22146	3.77633	0.32398	3.75181	0.42723	3.54517	0.18465	3.94427
2	adult	0.20157	3.71444	0.26341	3.83937	0.17168	3.87849	0.33147	3.92718	0.33012	3.76384	0.45094	3.81409	0.1967	3.87269
2	adult	0.17517	3.80323	0.2721	4.06366	0.17294	3.94974	0.26116	3.95394	0.34212	4.0456	0.44258	3.7591	0.19632	3.98935
2	adult	0.19997	3.80981	0.27954	3.98918	0.20661	4.11007	0.38235	3.81539	0.3703	3.83711	0.47656	3.9762	0.22805	3.75536
2	larve	2.39346	2.32587	2.82934	2.47355	2.60183	2.38312	2.23806	2.86091	2.9018	2.18117	2.40174	2.51288	2.27843	2.24206
2	larve	0.20778	3.72636	0.25289	3.85846	0.17107	3.73976	0.36695	3.74178	0.41829	3.75154	0.74162	3.38256	0.19957	3.7852
2	larve	0.18977	3.71307	0.72722	3.65759	0.17479	3.84688	0.22626	3.80853	0.38899	3.87573	0.64424	3.55542	0.20565	4.04255
2	adult	3.87699	0.65815	4.15415	0.69614	3.79411	0.85752	3.65871	1.05032	4.11776	0.59974	3.88327	0.67201	4.0408	0.55426
2	adult	0.19521	3.76829	0.25946	3.98841	0.40452	3.72207	0.31967	3.82002	0.42101	3.96917	0.5057	3.6345	0.20035	3.86656
2	adult	0.18941	3.54205	0.27148	3.87834	0.179	3.96481	0.31142	3.81749	0.40479	3.83827	0.4996	3.46267	0.18531	3.78468
2	adult	0.19928	3.78193	0.30721	3.88836	0.18328	3.90774	0.37575	3.70932	0.65695	3.71036	0.57099	3.65422	0.20935	3.6338
2	adult	0.18655	3.46825	0.32293	3.63318	0.19039	3.90868	0.32064	3.70346	0.36106	3.93657	0.45631	3.52944	0.21658	3.63528
2	adult	0.27339	3.77172	0.41482	3.86223	0.2399	3.99994	0.57821	3.80633	0.55065	3.68073	0.84929	3.48397	0.26914	3.70861
2	adult	0.21145	3.80312	0.27379	3.6239	0.16986	3.90971	0.43874	3.79014	0.40109	3.876	0.51445	3.52181	0.2218	3.98396
2	adult	3.92906	0.685	4.10649	0.70158	3.8339	0.80632	3.99165	0.65056	4.23156	0.56684	3.89412	0.7398	3.96384	0.53747
2	adult	0.17908	3.69723	0.27806	3.92401	0.16586	3.85392	0.22896	3.8547	0.33944	3.80766	0.44738	3.71618	0.17598	3.80492
2	adult	0.18069	3.9074	0.27231	3.72761	0.36617	3.88152	0.23518	3.90341	0.93933	3.6373	0.47461	3.5115	0.18205	3.87198
2	adult	3.77431	0.65226	3.98474	0.61681	3.94946	0.69872	4.0273	0.58637	4.01831	0.51683	3.85257	0.6141	3.71207	0.49467
2	adult	3.54035	0.60871	4.01439	0.6444	3.99724	0.74664	3.51199	0.47992	4.25218	0.51046	3.81308	0.57804	3.07618	1.01071
2	adult	3.67956	0.70547	4.0276	0.66768	3.91409	0.79139	3.85477	0.54343	4.06713	0.53125	3.93509	0.65815	3.98417	0.57593
2	adult	0.26979	3.85125	0.36252	3.75951	0.62023	3.72908	0.42496	3.74953	0.54059	3.63747	0.83501	3.30353	0.26549	3.62004
2	adult	0.2218	3.79879	0.28162	4.0554	0.15523	3.96479	0.24226	3.77234	0.59832	3.69633	0.47761	3.77891	0.17955	3.74346
2	adult	4.0655	0.57197	4.11566	0.6338	4.17168	0.71399	4.15525	0.58953	4.27067	0.57629	3.88841	0.61249	3.90404	0.54579
2	adult	0.20383	3.89154	0.27438	3.77465	0.17578	3.92895	0.2726	3.75147	0.34378	3.71851	0.4272	3.65208	0.18493	3.88407
2	adult	0.18965	3.78558	0.29106	3.65514	0.17439	3.84204	0.29887	3.85511	0.29197	3.67424	0.41256	3.56236	0.18254	3.55199
2	adult	3.71279	0.58765	4.10334	0.65045	3.90877	0.69874	3.23917	0.83238	4.02934	0.53951	3.8079	0.61025	3.82777	0.48811
2	adult	3.63947	0.61054	4.38421	0.74201	3.83072	0.71701	3.72959	0.5358	4.18123	0.58133	3.76037	0.64509	3.8329	0.66556
2	adult	2.80784	0.56664	3.68242	0.51398	0.41287	0.61156	4.02999	0.53575	0.44727	0.8099	3.60964	0.65756	1.58296	0.4732
2	adult	0.22754	3.78106	0.26279	3.6804	0.18541	3.92191	0.36452	3.86873	0.5035	3.80783	0.68155	3.54102	0.21993	3.68451
2	adult	0.1934	3.67378	0.30592	3.77878	0.22419	3.80427	0.31739	3.77644	0.3974	3.8312	0.5044	3.65612	0.20717	4.06035
2	adult	3.53942	0.432	4.11466	0.57353	3.95062	0.48458	3.24818	0.48018	4.00844	0.50135	3.87306	0.66857	0.38563	0.48458
2	adult	0.1965	3.79584	0.25804	3.94467	0.16637	3.77645	0.27946	3.92328	0.33642	3.79215	0.43194	3.76438	0.1844	3.79793
2	adult	0.19604	3.7639	0.25878	3.91518	0.17827	3.89366	0.28414	3.86944	0.25328	3.90383	0.37258	3.65716	0.2462	3.55893
2	adult	3.6986	0.61135	3.97078	0.57591	3.74578	0.82883	3.52433	0.7519	4.01366	0.56855	3.42842	0.99488	3.34042	0.56562
2	adult	3.63772	0.63713	3.97757	0.65101	3.94142	0.73718	3.55589	0.56827	4.02419	0.53651	3.44083	0.54407	3.83648	0.54569
2	adult	4.01525	0.60186	4.24237	0.64761	3.95623	0.8305	3.95461	0.54291	4.29321	0.56753	3.95416	0.67243	3.9126	0.52129
2	adult	0.25749	3.65838	0.8862	3.49632	0.22233	3.9663	0.45146	3.92957	0.56914	3.36403	0.74108	3.2871	0.24112	3.6789
2	adult	0.20064	3.84699	0.49774	3.72787	0.17452	3.84701	0.21112	3.63895	0.3775	3.72102	0.44983	3.51469	0.20331	3.97649
2	adult	3.90406	0.58117	3.97762	0.51895	3.82035	0.62377	3.89804	0.53353	4.01103	0.54829	3.79383	0.5651	3.82376	0.53402
2	adult	0.18767	3.72925	0.2732	3.98739	0.17459	4.04528	0.27472	4.07049	0.35803	3.91634	0.41378	3.40885	0.19158	3.95711
2	adult	0.22616	3.76004	0.2732	3.86145	0.1688	3.8762	0.34258	3.96262	0.31204	3.78728	0.41595	3.80526	0.19237	3.77783
2	adult	3.57751	0.60285	4.07806	0.62266	3.87927	0.71352	3.41143	0.53241	3.94875	0.49068	3.67312	0.58777	3.53221	0.51652
2	adult	3.77594	0.64436	4.10527	0.65477	3.75377	0.63524	3.64409	0.52904	4.13627	0.50237	3.73247	0.55596	3.92281	0.50242
2	adult	3.87594	0.65541	4.25271	0.62359	3.91515	0.71397	3.81122	0.54181	4.08085	0.50851	3.92075	0.64288	3.73732	0.54189
2	adult	0.23478	3.67636	0.33523	3.73102	0.20887	3.98562	0.37154	3.74076	0.49835	3.71876	0.74613	3.47723	0.20507	3.67135
2	adult	0.20392	3.84034	0.25496	3.64448	0.17547	3.79001	0.27294	3.84544	0.36587	3.55059	0.48555	3.49356	0.2132	3.91047
2	adult	3.82871	0.56585	4.09722	0.60743	3.84128	0.69343	3.98456	0.58282	4.14783	0.60324	3.94235	0.60355	3.91227	0.53694
2	adult	0.19087	3.75424	0.27554	4.06637	0.15801	3.76747	0.25756	4.08136	0.35896	3.91515	0.43906	3.70094	0.19803	3.87181
2	adult	0.19272	3.99362	0.26972	3.70712	0.18131	3.86486	0.31351	3.62367	0.32102	3.90479	0.39716	3.85281	0.17955	3.88629
2	adult	3.76045	0.61311	3.94159	0.68861	3.86275	0.66083	3.46795	0.72849	4.21043	0.57699	3.73796	0.59676	3.83571	0.55066
2	adult	3.95729	0.59333	3.98548	0.56502	4.10557	0.76752	3.84964	0.69976	3.92279	0.5063	3.9104	0.61995	3.61303	0.51821
2	adult	3.78065	0.56111	4.1675	0.61449	3.93333	0.75556	4.07982	0.54374	4.04539	0.51632	4.05355	0.64962	0.69602	0.97999
2	adult	0.23482	3.92354	0.33133	3.74638	0.21133	3.94101	0.39213	3.73191	0.58811	3.75951	0.71826	3.5981	0.22822	3.70515
2	adult	0.18922	3.73912	0.22995	3.80693	0.17446	3.89762	0.21138	3.57212	1.77722	3.04182	0.53958	3.51654	0.2063	4.06673
2	adult	4.02492	0.56314	3.79267	0.55031	4.09431	0.65779	3.79363	0.56399	4.0971	0.53771	3.83917	0.58682	3.97798	0.52666
2	adult	0.20567	3.76389	0.3712	3.7485	0.21351	3.81099	0.27697	3.97632	0.32525	3.73684	0.39449	3.59097	0.3489	3.66899
2	adult	0.1921	3.82747	0.26466	3.70601	0.16636	3.87977	0.22465	3.71331	0.32384	3.90599	0.38297	3.54176	0.20643	3.97496
2	adult	3.64966	0.54141	4.00836	0.56943	4.0462	0.7097	3.74801	0.55512	4.11533	0.50955	3.63726	0.53998	3.79062	0.50849
2	adult	3.66855	0.56525	4.10523	0.54781	4.18721	0.68985	4.04463	0.55567	4.10935	0.46678	4.01044	0.57181	3.68457	0.61838
2	adult	3.84152	0.65123	4.22358	0.61239	4.05897	0.72907	2.93258	1.29136	4.19312	0.52934	3.7817	0.57448	3.76789	0.5191
2	adult	0.18998	3.52861	0.21681	3.84901	0.17955	3.7689	0.2299	3.78912	0.39364	3.78766	0.44666	3.78907	0.1905	3.68524
2	adult	0.21253	3.69232	0.27759	3.78091	0.21949	4.03666	0.3919	3.80592	0.32012	3.8253	0.43388	3.7372	0.22822	3.88825
2	adult	4.07278	0.55972	4.16844	0.60716	3.95826	0.575	3.88557	0.60868	4.07216	0.54549	3.90579	0.55917	3.96587	0.53407
2	adult	0.2048	4.11609	0.25473	3.86807	0.17778	3.74241	0.25842	3.74224	0.31902	4.09369	0.36778	3.40454	0.21244	3.9465
2	adult	0.19755	3.78141	0.25795	4.01025	0.16132	3.73165	0.27646	4.06578	0.33037	3.954	0.34354	3.38024	0.17846	3.83447
2	adult	3.56299	0.56045	4.23378	0.64048	4.06959	0.69692	3.95231	0.55358	4.2426	0.48784	3.9844	0.57332	3.79881	0.49898
2	adult	3.48616	0.5645	4.17085	0.63625	3.92788	0.76163	3.7476	0.54372	4.14357	0.51463	3.92366	0.60017	3.98443	0.54419
2	adult	3.82717	0.66385	4.16502	0.68345	3.94964	0.74329	3.91894	0.532	4.40393	0.58424	4.06168	0.66168	4.11468	0.53997
2	adult	0.21656	3.78758	0.2912	3.80751	0.19997	3.90918	0.33187	3.86674	0.43446	3.65783	0.52639	3.51945	0.19208	3.77771
2	adult	3.88579	0.68437	4.07664	0.61636	3.99742	0.85444	3.94583	0.58332	4.05381	0.56541	3.76098	0.61418	3.65262	0.50321
2	adult	4.10531	0.57378	3.94648	0.57575	4.10668	0.68342	3.98682	0.66692	4.04827	0.501	4.0385	0.62242	3.97253	0.51686
2	adult	0.18471	3.83187	0.27332	3.95937	0.17523	3.99926	0.29459	3.9146	0.27103	3.73856	0.38653	3.76816	0.28744	3.95842
2	adult	0.1858	3.859	0.23882	3.84392	0.16201	3.96601	0.28159	3.77134	0.32119	3.79939	0.36539	3.76228	0.19101	3.95583
2	adult	3.33131	0.87055	4.14051	0.60186	3.57485	0.94732	3.50134	0.52971	4.25608	0.54139	3.70723	0.53094	3.83382	0.48088
2	adult	3.78856	0.62639	4.1364	0.63057	3.93107	0.7023	3.64059	0.56124	4.05016	0.53157	3.89117	0.6138	3.85944	0.54429
2	adult	3.74138	0.60538	4.18071	0.60876	4.03367	0.7601	3.98826	0.55252	4.10873	0.54818	3.84422	0.59872	3.90267	0.45825
2	adult	0.22112	3.79026	0.27337	3.82524	0.18965	3.82499	0.29115	3.99953	0.44111	3.66914	0.55742	3.61879	0.19871	3.85996
2	adult	4.05987	0.58446	4.03535	0.5789	3.69707	0.6873	3.86965	0.51823	4.04429	0.54991	3.91996	0.58843	3.83916	0.46908
2	adult	3.94343	0.5472	4.00578	0.54333	4.01481	0.65929	3.89177	0.59048	4.12511	0.51833	3.95776	0.65251	3.54056	0.5349
2	adult	0.18457	3.85055	0.20731	4.20503	0.16775	3.80028	0.28137	3.88408	0.38555	2.01204	0.36614	3.9376	0.52659	0.88413
2	adult	0.19516	3.74076	0.24143	4.1061	0.16989	3.94972	0.2434	3.96285	0.30991	3.79665	0.3484	3.77915	0.19577	3.99858
2	adult	3.22233	0.51521	3.84378	0.87093	3.98453	0.602	2.99775	0.49813	4.0993	0.5013	2.99065	0.59038	3.46615	0.4943
2	adult	3.07369	0.75923	3.96941	0.72914	3.62525	0.81937	3.37245	0.58056	3.66917	0.6261	3.51201	0.71714	3.59668	0.47593
2	adult	3.97368	0.56954	4.03666	0.51478	4.20064	0.7331	3.97787	0.55853	4.23559	0.51645	3.95714	0.56022	3.90397	0.52798
2	adult	0.2236	3.86948	0.28552	3.81344	0.19147	3.83967	0.34271	3.85576	0.4262	3.75271	0.65924	3.71387	0.20936	3.86745
2	adult	3.97934	0.60345	4.13701	0.60948	3.93019	0.75537	4.11737	0.57681	4.14152	0.57652	3.94574	0.63213	3.90624	0.51178
2	adult	3.87503	0.56842	4.09349	0.60798	4.08856	0.70938	3.98204	0.58416	4.10829	0.51555	4.04686	0.61635	3.98472	0.49205
2	adult	0.19724	4.05736	0.25481	3.84322	0.18249	4.03491	0.30107	4.15792	0.25998	4.07659	0.36577	3.79982	0.65721	0.97698
2	adult	0.21573	3.85518	0.25967	3.77346	0.19286	3.87452	0.35488	3.74089	0.34808	3.81818	0.40328	3.67599	0.17784	3.7856
2	adult	3.89269	0.57471	4.19143	0.63969	3.89217	0.66931	3.94715	0.53437	1.6096	0.56419	3.92698	0.57412	0.46412	0.87532
2	adult	3.6011	0.73401	4.06499	0.62551	3.99581	0.74561	3.61916	0.51352	4.2324	0.52652	4.09315	0.63541	3.82553	0.5151
2	adult	3.64849	0.5895	4.22357	0.56922	3.96094	0.67431	3.62716	0.51538	4.38121	0.47988	3.75908	0.60159	3.8122	0.51981
2	adult	0.20646	3.77672	0.23656	3.66869	0.16729	3.77878	0.23198	3.95568	0.4029	3.75275	0.54262	3.6978	0.21161	4.16635
2	adult	3.76991	0.60918	3.92758	0.61068	4.0345	0.81079	3.89321	0.5673	4.16724	0.61267	3.88919	0.61146	3.98619	0.52611
2	adult	4.15551	0.63369	4.17659	0.63099	3.8733	0.81955	3.8789	0.73596	4.18622	0.57448	3.84341	0.60676	4.05334	0.54084
2	adult	0.19532	3.79907	0.24594	3.71018	0.20037	4.06536	0.29644	4.08549	0.25081	4.08893	0.4384	3.86743	0.20932	3.82022
2	adult	0.30137	3.71614	0.21959	3.75525	0.16992	3.98101	0.26626	3.84474	0.34405	3.86768	0.45285	3.5283	0.19254	3.8242
2	adult	3.62646	0.60682	4.22984	0.66656	3.93949	0.76299	4.08273	0.57851	4.22347	0.5445	3.78764	0.60294	3.88465	0.58159
2	adult	3.24268	0.54788	4.30383	0.68715	3.91935	0.71669	3.85111	0.54096	4.23368	0.57009	4.04523	0.68403	0.46095	0.84846
2	adult	2.90313	0.73108	3.5592	0.48438	3.75445	0.64375	2.30082	0.49508	4.14404	0.51925	3.65143	0.5965	3.73129	0.49435
2	adult	0.26146	3.54511	0.5974	3.71083	0.23338	3.88339	0.44506	3.83732	0.53185	3.5224	0.72058	3.4348	0.25102	3.78274
2	adult	3.89311	0.56641	4.22443	0.6566	3.97294	0.83259	3.93079	0.64885	4.27676	0.68315	4.0188	0.70206	3.94893	0.5942
2	adult	3.87192	0.66514	4.00563	0.68761	3.77343	1.00868	3.95333	0.69054	4.19122	0.63338	3.96206	0.70716	4.07335	0.5657
2	adult	0.21881	3.70859	0.35405	3.90501	0.19453	3.73189	0.45568	3.67405	1.09541	3.53431	0.79625	3.56152	0.32296	3.7805
2	adult	3.66292	0.7149	4.15125	0.728	3.69352	0.91521	3.93387	0.63279	4.00086	0.54187	3.69342	0.90942	3.83096	0.50769
2	adult	3.45014	0.64962	3.95671	0.61942	3.88611	0.93405	2.72486	1.63391	3.89904	0.55225	3.66363	0.59502	3.76108	0.55062
2	adult	3.34459	0.80701	4.00737	0.63757	3.76465	0.83343	3.8126	0.58116	3.98385	0.72313	3.63714	0.72282	3.77409	0.54413
2	adult	3.82591	0.82889	3.99703	0.68039	3.74847	0.88853	3.97349	0.52859	4.08806	0.53328	3.85964	0.67089	4.06744	0.58988
2	adult	3.80936	0.65	4.11948	0.67034	3.81294	0.76789	3.93567	0.67668	3.76117	0.71747	3.90488	0.67794	3.35137	0.78931
2	adult	0.23542	3.85198	0.30705	3.8956	0.16965	3.85076	0.38051	3.84207	0.34574	3.82363	0.48813	3.63797	0.21361	3.94843
2	adult	0.1989	3.95042	0.31656	3.95591	0.17983	3.82242	0.36848	3.89593	0.30519	3.69848	0.44731	3.48232	0.21132	3.87751
2	adult	0.17913	3.95154	0.35143	3.88615	0.15804	3.81397	0.25391	3.76658	0.32679	3.70677	0.46419	3.76751	0.18237	3.74606
2	adult	0.20035	3.9346	0.32091	3.79639	0.16817	3.75499	0.27862	3.80304	0.34233	3.78599	0.41989	3.92358	0.40216	3.76897
2	hatchlings	0.20882	3.82951	0.34716	3.95835	0.20535	3.9406	0.39143	3.85977	0.35687	3.81814	0.4645	3.81538	0.21303	3.89762
2	hatchlings	0.31392	3.79446	0.30229	3.95216	0.25796	3.97304	0.38924	3.85635	0.91385	0.89665	0.29879	3.8117	0.30516	3.59002
2	adult	3.63874	0.78087	3.75589	0.64608	3.79946	0.89387	3.86122	0.56222	3.94447	0.58974	3.7356	0.70401	4.01185	0.62391
2	adult	3.63218	0.69036	4.17093	0.66457	3.71021	0.75946	3.57676	0.56218	3.95892	0.50764	3.67447	0.70576	3.77436	0.52617
2	adult	0.20577	3.82658	0.31126	3.94042	0.19237	3.91102	0.39582	3.727	0.26303	3.81358	0.51215	3.50799	0.20532	3.92679
2	adult	0.24064	3.69857	0.25978	3.78536	0.22501	3.91461	0.3363	3.89313	0.33089	3.83455	0.42085	4.19913	0.17704	4.01018
2	adult	0.19438	3.69631	0.37105	3.68085	0.1981	3.87673	0.32647	3.7289	0.31041	3.91444	0.39987	4.02333	0.21525	3.92006
2	adult	0.19399	3.66098	0.3045	3.89092	0.17177	3.88451	0.2529	3.55482	0.31058	3.706	0.37044	3.96882	0.18527	3.76183
2	hatchlings	0.21675	3.86868	0.27242	3.90183	0.20609	3.82983	0.30843	3.96008	0.27391	4.09502	0.27786	4.62691	0.2074	3.76965
2	hatchlings	3.97033	0.58091	4.03826	0.65189	3.84542	0.71068	3.5561	0.62608	1.07482	1.18696	4.0858	0.63281	4.06844	0.54587
2	adult	3.67791	0.7359	3.83766	0.63733	3.83359	1.00095	3.57445	0.51241	4.09737	0.55129	3.84019	0.69154	4.1132	0.56319
2	adult	3.5922	0.66147	3.92005	0.59298	3.82192	0.79048	3.785	0.55374	4.10284	0.57614	3.61951	0.58	3.88466	0.52869
2	adult	0.21853	3.82176	0.30865	4.09798	0.19438	3.6798	0.3317	3.82196	0.38554	3.89626	0.45226	3.54526	0.18767	3.86784
2	adult	0.21203	3.8493	0.30592	3.77555	0.18668	4.08977	0.29911	3.6832	0.31328	3.83609	0.47152	3.46752	0.19539	4.19164
2	adult	0.19734	3.86275	0.32928	3.73786	0.17185	3.91561	0.25075	3.69652	0.32856	3.88106	0.37892	3.70863	0.1911	3.95871
2	adult	0.19533	3.82466	0.3634	3.92907	0.17942	3.75611	0.31045	3.62625	0.33171	3.82497	0.39624	3.83457	0.19457	3.85617
2	hatchlings	0.21177	3.88891	0.29647	4.11003	0.21752	3.89409	0.30129	4.03716	0.33256	3.98912	0.30837	3.72741	0.21337	3.76165
2	hatchlings	4.02403	0.57823	4.07928	0.62119	4.02524	0.79266	4.08223	0.67855	0.98438	0.60938	0.73153	0.82796	3.83056	0.4766
2	adult	3.62324	0.72584	4.03569	0.66734	3.86928	0.97399	3.80794	0.54341	4.06907	0.58407	3.86662	0.66052	4.0207	0.52769
2	adult	3.93894	0.59282	3.99812	0.60348	3.94863	0.74618	3.98163	0.5481	4.05441	0.60182	3.65268	0.53939	3.88529	0.50668
2	adult	0.20882	3.75682	0.32533	3.92173	0.20704	4.00557	0.3276	3.74399	0.34918	3.88942	0.46059	3.51767	0.38869	3.97438
2	adult	0.19422	2.71211	0.27295	3.63502	0.18319	3.70187	0.33106	3.8986	0.26352	3.88737	0.39499	3.72315	0.26849	3.76449
2	adult	0.20182	3.90404	0.28023	3.80407	0.17802	3.95395	0.26331	3.95493	0.32581	3.79016	0.37678	3.77469	0.27282	3.85135
2	adult	0.2047	3.92179	0.2747	3.79503	0.2005	3.85142	0.41059	3.83616	0.3283	3.94628	0.34778	3.59518	0.19909	3.71597
2	hatchlings	0.22868	3.94667	0.2515	3.91228	0.18682	3.80246	0.29033	4.10257	0.25457	4.05124	0.25652	4.06761	0.21838	3.86705
2	hatchlings	0.28197	3.7438	0.32703	3.9889	0.21352	3.88178	0.4676	4.04035	0.71991	0.95925	0.45387	3.90523	0.26334	3.98324
2	adult	3.77154	0.79099	3.88003	0.64168	3.74062	0.91405	3.24327	1.11521	4.08862	0.61854	3.7155	0.67907	3.95129	0.54404
2	adult	4.03479	0.60785	4.06308	0.57484	3.83596	0.75221	4.04081	0.61024	4.14471	0.62321	3.85757	0.59334	0.5528	0.83887
2	adult	0.23662	3.83995	0.25676	3.78227	0.23228	3.85491	0.33474	4.02448	0.32805	4.017	0.40575	3.65664	0.21087	3.86515
2	adult	0.225	3.77678	0.25694	3.92973	0.16937	3.94109	0.28883	3.76956	0.30641	3.79879	0.37256	3.78981	0.19347	3.6636
2	adult	0.19714	3.69035	0.27452	3.73525	0.178	3.68379	0.23915	3.80492	0.32041	3.78994	0.38947	3.5994	0.18665	4.11955
2	adult	0.22615	3.75453	0.28191	3.87622	0.18584	3.94914	0.30436	3.83607	0.28464	3.83145	0.35719	3.71549	0.2026	3.61304
2	hatchlings	0.21667	3.78229	0.24149	3.99288	0.2049	4.18945	0.30201	3.85304	0.28245	3.91048	0.30765	4.0347	0.22443	3.76882
2	hatchlings	0.26988	3.8618	0.32105	3.62919	0.23138	3.81283	0.77396	0.80504	0.78318	0.69184	0.40508	3.64764	0.27522	3.67518
2	adult	3.62472	0.72644	4.11372	0.60593	3.70605	0.83414	3.79013	0.51236	3.98036	0.55719	3.44683	0.71492	3.54449	0.45645
2	adult	3.79707	0.68578	3.96227	0.62669	3.78985	0.74437	3.57682	0.49412	3.92884	0.51688	3.69553	0.59964	3.84521	0.54046
2	adult	0.20786	3.53386	0.31744	3.83009	0.20925	3.62864	0.31013	3.92229	0.32419	3.86673	0.45515	3.63704	0.20601	4.01985
2	adult	0.19849	3.90046	0.26299	3.88131	0.17291	3.82428	0.22608	3.62579	0.35406	3.60045	0.38881	3.4337	0.17512	3.80976
2	adult	0.21683	3.98088	0.28255	3.71192	0.18325	3.84733	0.29754	3.76464	0.30377	4.01136	0.39756	3.55915	0.19146	3.7352
2	adult	0.18226	3.67588	0.26887	3.69237	0.16744	3.76734	0.33482	3.85948	0.28773	3.78706	0.35672	3.52869	0.18013	3.78185
2	hatchlings	0.20719	3.78624	0.28516	3.7544	0.18193	3.72686	0.31363	3.86336	0.25625	3.81473	0.30159	3.87878	0.21441	3.79114
2	adult	3.79053	0.63353	4.12909	0.65142	3.9852	0.80678	3.97786	0.63838	2.92272	0.54849	3.96584	0.72432	3.84116	0.46835
2	adult	3.53147	0.67016	3.87623	0.60115	3.6572	0.77095	3.59984	0.50338	4.00063	0.53161	3.738	0.64741	3.9023	0.49596
2	adult	3.64766	0.63321	3.83947	0.61994	3.78669	0.77135	3.78202	0.54836	3.95113	0.55751	3.82186	0.61246	3.91428	0.52194
2	adult	0.2033	3.68879	0.25066	3.76079	0.18251	4.00194	0.30652	3.83347	0.31163	3.99336	0.41741	3.60023	0.19696	3.74997
2	adult	0.19875	3.82508	0.27092	3.96964	0.16564	3.97471	0.25518	3.90168	0.6658	3.64978	0.42839	3.69375	0.19419	3.87085
2	adult	0.20493	3.82253	0.26585	3.84934	0.17232	4.00943	0.25338	3.87762	0.31155	3.873	0.40574	3.62058	0.18587	3.80118
2	adult	0.2222	3.74546	0.30122	3.86634	0.21887	3.8289	0.27916	3.88344	0.333	3.69863	0.34194	3.88212	0.20561	3.7676
2	hatchlings	0.26124	3.52472	0.25633	3.75645	0.2374	3.82549	0.27961	4.04285	0.26522	4.04922	0.26921	3.94008	0.24633	4.06442
2	adult	3.72651	0.67634	4.06977	0.72351	3.81162	0.88162	4.13425	0.65123	4.19023	0.54521	3.93118	0.68786	3.6947	0.51212
2	adult	3.90512	0.64083	3.96534	0.60181	3.89741	0.8138	3.99387	0.57296	4.08413	0.59322	3.92713	0.64248	4.06588	0.50553
2	adult	3.78522	0.66241	3.89412	0.61003	3.87006	0.71948	3.62833	0.73025	4.09452	0.56392	3.6091	0.57611	3.77046	0.58979
2	adult	0.18443	3.92195	0.26948	3.7407	0.17929	4.03959	0.30578	3.90854	0.30336	3.77284	0.39671	3.79723	0.19099	4.17458
2	adult	0.19827	3.85927	0.25309	3.89669	0.18628	3.87825	0.27538	3.82162	0.29889	4.08732	0.37078	3.69007	0.21107	3.89707
2	adult	0.22693	3.8305	0.32772	3.74186	0.16672	3.7459	0.30435	4.08694	0.36309	3.88527	0.38865	3.60876	0.17577	3.88278
2	adult	0.18569	3.7776	0.26298	3.83121	0.18983	4.0213	0.25174	3.7463	0.29275	3.84014	0.39585	3.882	0.22457	3.61863
2	hatchlings	0.21513	3.88771	0.28621	3.78884	0.17138	3.76172	0.3271	3.93123	0.28019	3.99667	0.37168	3.77062	0.20664	3.81995
2	adult	3.9449	0.62727	4.10267	0.66988	3.88416	0.75084	4.11156	0.62207	3.97889	0.55016	3.89776	0.63383	3.8788	0.5027
2	adult	3.68597	0.68793	3.86526	0.59633	3.73845	0.87877	3.77987	0.59792	4.17058	0.56237	3.73011	0.60164	3.89324	0.58527
2	adult	3.69424	0.62206	3.8595	0.57528	3.85132	0.6901	2.05174	1.18021	4.0221	0.55568	3.81289	0.62293	3.80385	0.51725
2	adult	0.24756	3.86961	0.2608	3.86013	0.19202	3.81245	0.28429	3.87617	0.26507	3.78043	0.40977	3.71298	0.18631	4.04467
2	adult	0.2041	3.92544	0.27748	3.79489	0.17867	3.95391	0.31096	3.75131	0.29659	4.10868	0.35723	3.72685	0.1914	3.97321
2	adult	0.18299	3.80867	0.24915	3.8229	0.17639	3.90384	0.25604	3.77663	0.30372	3.77269	0.35037	3.59203	0.18214	3.74795
2	hatchlings	0.20231	3.78523	0.26246	3.98054	0.18244	3.88912	0.27578	3.93723	0.24341	3.94809	0.26294	3.92903	0.21572	4.22483
2	hatchlings	0.21474	3.74193	0.26384	3.91416	0.18128	3.94277	0.30212	3.76628	0.23925	3.96258	0.28453	3.77878	0.20166	3.58233
2	adult	4.00382	0.74888	3.95942	0.72943	3.77955	0.86262	4.12101	0.61095	3.98931	0.50052	3.62114	0.60432	3.76621	0.50187
2	adult	3.79804	0.69229	4.09424	0.58749	3.80459	0.78424	3.24757	1.14065	3.97296	0.54912	3.95105	0.70727	3.73142	0.56276
2	adult	0.20071	3.69403	0.20876	3.55037	0.23446	3.89671	0.32036	3.87628	0.22127	3.70618	0.39347	3.75003	0.21022	3.94536
2	adult	0.21169	3.82907	0.24972	3.92936	0.17376	3.80726	0.34343	4.00802	0.30286	3.81367	0.44622	3.732	0.18736	4.16158
2	adult	0.18274	3.94043	0.28838	3.76716	0.16831	4.04633	0.32661	3.93543	0.28862	3.95204	0.39808	3.90719	0.19017	4.03279
2	adult	0.21488	3.76217	0.25667	3.88022	0.15979	3.86069	0.30045	3.95647	0.28602	3.95836	0.3606	3.68993	0.18981	3.92336
2	hatchlings	0.20218	3.84278	0.23232	3.92616	0.17722	4.08477	0.26845	3.75838	0.22288	3.90539	0.23291	4.08348	0.20193	3.73926
2	hatchlings	0.20709	3.95237	0.24242	3.95219	0.18125	4.00988	0.25931	3.89926	0.23125	4.18146	0.24952	4.16215	0.23209	4.25715
2	adult	2.85605	0.46062	4.02867	0.62665	3.84529	0.88172	4.02301	0.63962	4.20532	0.53642	3.78288	0.56196	4.09764	0.63323
2	adult	3.59762	0.71865	4.04286	0.58531	3.86411	0.81501	3.63051	0.52261	4.03752	0.54692	3.80558	0.5486	3.93386	0.55405
2	adult	0.2181	3.72125	0.25236	3.77871	0.18376	3.77979	0.32921	3.92171	0.34178	3.8225	0.4804	3.58347	0.23939	3.85016
2	adult	0.18572	3.60952	0.28059	3.96355	0.18507	3.85954	0.19541	3.88039	0.23827	3.83559	0.40087	3.68087	0.19697	3.81496
2	adult	0.18973	3.76267	0.26795	3.94005	0.18055	3.96252	0.34904	4.09239	0.29635	4.00903	0.36617	3.8668	0.21743	4.27725
2	adult	0.21089	3.76473	0.3157	3.73978	0.17214	3.95702	0.36651	3.79693	0.2962	3.86273	0.39223	3.73354	0.19701	3.58227
2	hatchlings	0.20346	3.89386	0.25178	4.03582	0.17632	3.82528	0.3354	3.95074	0.2623	3.99389	0.28545	4.01022	0.21864	4.22449
2	hatchlings	0.21003	3.89544	0.25588	4.02668	0.18775	4.06945	0.28617	3.92598	0.22501	3.8854	0.26259	3.82705	0.22426	3.94057
2	adult	3.73487	0.67772	3.98789	0.64843	3.70856	0.92778	4.05458	0.62467	4.06825	0.58209	3.80837	0.64033	3.98283	0.51003
2	adult	3.77399	0.74309	3.93593	0.59933	3.83871	0.86453	3.88104	0.57954	4.11253	0.55959	3.84593	0.76337	4.00811	0.56044
2	adult	0.2107	3.74941	0.29603	3.88121	0.19267	3.9163	0.42385	3.73163	0.34589	3.80177	0.52976	3.55315	0.2152	3.80739
2	adult	0.20418	3.86149	0.29597	3.87115	0.17003	3.87976	0.32234	3.82873	0.40742	4.06313	0.57334	3.83519	0.29853	3.83091
2	adult	0.22777	3.80233	0.28979	4.21324	0.19245	3.90355	0.41784	3.83953	0.4252	3.97841	0.5364	4.0495	0.21023	3.97918
2	adult	0.2008	3.70964	0.31717	3.73183	0.19713	3.86187	0.48254	3.70448	0.40427	3.72104	0.52999	3.85926	0.24319	3.81952
2	hatchlings	0.21256	4.44706	0.27482	3.98043	0.20753	4.08291	0.46422	3.77506	0.28613	3.72634	0.33873	4.21136	0.22464	3.89741
2	hatchlings	0.21516	3.73125	0.28948	3.77574	0.187	3.86187	0.41733	3.80007	0.28118	3.87271	0.41893	4.22527	0.22353	3.83674
2	adult	3.65536	0.69956	3.87555	0.6797	3.83564	0.94832	4.00684	0.66243	4.09284	0.58582	3.81063	0.66297	4.01251	0.51577
2	adult	3.72037	0.74625	3.95379	0.71778	3.81565	0.93156	3.94421	0.60473	4.01229	0.59991	3.90503	0.67738	3.87298	0.53614
2	adult	3.77476	0.59754	4.07054	0.66853	3.83005	0.72396	3.84159	0.59265	4.07364	0.55216	3.78405	0.6098	3.95422	0.55683
2	adult	3.71995	0.49201	3.97785	0.60839	3.95436	0.57331	3.71459	0.55622	4.05686	0.51411	3.93109	0.6329	4.03532	0.52347
2	adult	3.88535	0.73469	4.00191	0.69459	3.82429	0.75755	3.89184	0.6179	3.73782	0.54494	3.85952	0.71788	3.97551	0.58827
2	adult	3.91659	0.60255	4.176	0.68473	3.94772	0.76794	3.97154	0.55266	4.15059	0.53044	3.87522	0.58779	3.85887	0.50655
2	adult	3.785	0.60197	4.11987	0.65941	4.05826	0.6775	3.94964	0.5489	4.10924	0.55592	3.79926	0.57298	3.8696	0.48572
2	adult	3.81128	0.66166	4.06469	0.706	3.87394	0.85237	4.00153	0.5713	4.15488	0.5978	3.91376	0.69316	4.01946	0.53224
2	adult	3.90012	0.72787	4.22418	0.70372	3.90121	0.9608	3.99328	0.70951	0.98958	0.91004	4.02509	0.68654	4.02271	0.51991
2	adult	3.82245	0.73418	4.11459	0.71774	3.7339	0.97827	3.99295	0.60069	4.03292	0.633	3.807	0.7312	3.82787	0.509
2	adult	3.99299	0.67284	3.84905	0.62232	3.92627	0.84503	3.80409	0.56692	3.98933	0.57701	3.80056	0.69987	3.89006	0.6085
2	adult	3.69312	0.6269	4.01799	0.62911	3.8836	0.77773	3.79596	0.51211	4.06157	0.5338	3.87454	0.68808	3.85046	0.50224
2	adult	3.63774	0.63897	3.98707	0.6033	3.80271	0.80031	4.04896	0.58539	4.20412	0.52166	3.92356	0.61796	3.87427	0.55461
2	adult	3.7749	0.56088	4.03573	0.63096	3.88321	0.70119	3.84049	0.58533	4.29185	0.5924	3.83359	0.66007	3.934	0.53971
2	adult	3.84173	0.56203	3.76181	0.62043	3.8193	0.74401	3.90745	0.56668	3.99532	0.55823	3.75798	0.60752	4.04345	0.54172
2	adult	3.99708	0.64483	4.02081	0.67728	3.85322	0.79549	3.87334	0.55818	4.01506	0.60117	3.92588	0.65935	3.94054	0.5765
2	adult	3.80636	0.67904	4.054	0.66932	3.598	0.92926	4.08493	0.63031	1.2354	0.91689	3.86702	0.679	3.99149	0.55359
2	adult	0.23433	1.4043	3.50178	0.50022	3.05507	0.60915	2.20566	0.48342	4.02165	0.50585	0.271	0.46167	0.24161	0.47547
2	adult	3.8801	0.69642	3.90819	0.62238	3.87749	0.7941	3.91907	0.59619	3.94748	0.55924	3.84857	0.65227	3.92599	0.62053
2	adult	3.90918	0.62169	3.97735	0.63748	3.92781	0.81324	3.94083	0.58379	4.1089	0.58053	3.88316	0.61919	3.71545	0.54069
2	adult	3.63681	0.56345	4.03024	0.57655	3.91517	0.66903	3.74818	0.54082	4.04639	0.53762	3.74222	0.57555	3.7689	0.59404
2	adult	4.02575	0.69664	4.05985	0.60664	3.93418	0.71675	3.71076	0.55127	4.22636	0.56531	3.78218	0.56797	3.86443	0.52238
2	adult	3.81723	0.55987	4.11034	0.64417	3.7521	0.70772	3.92482	0.54007	3.97775	0.52666	3.85463	0.63087	3.78215	0.51417
2	adult	3.64267	0.53784	4.16862	0.58984	3.78769	0.6833	3.81697	0.50249	4.12493	0.59486	4.01945	0.6344	3.84396	0.48554
2	adult	3.96809	0.70969	4.13207	0.71646	3.78799	0.91883	3.89123	0.60911	0.97432	0.80872	3.80937	0.64426	3.99604	0.49947
2	adult	3.75292	0.66031	3.8335	0.60902	3.69453	0.86413	3.96512	0.6048	3.87028	0.57297	0.26633	0.39588	3.91893	0.58679
2	adult	3.52938	0.56347	3.94653	0.486	3.85488	0.56856	3.42986	0.46886	3.91931	0.55295	3.66698	0.54242	3.60855	0.51997
2	adult	3.9609	0.63052	4.05382	0.64618	3.94269	0.84318	3.92505	0.56581	4.09308	0.52367	3.80634	0.64749	3.9731	0.52598
2	adult	3.85278	0.66351	3.93135	0.61107	3.90815	0.83195	3.84111	0.57122	3.86196	0.58523	3.9697	0.60588	4.13641	0.55705
2	adult	3.57691	0.55474	3.92998	0.58707	3.88102	0.651	3.6839	0.52713	4.00206	0.51474	3.63039	0.57153	3.47464	0.50849
2	adult	3.86187	0.68363	4.04217	0.64648	3.97485	0.68856	3.96699	0.55358	4.15342	0.53576	3.79001	0.67586	3.92073	0.49599
2	adult	3.9028	0.55664	4.04588	0.60623	4.07243	0.78159	3.95074	0.63589	4.13325	0.59109	4.22214	0.68756	3.83675	0.50527
2	adult	3.94485	0.66921	4.05037	0.6477	3.8109	0.8832	3.94924	0.56358	0.70161	0.61364	3.89196	0.67047	3.79157	0.51057
2	adult	4.01729	0.68673	3.97196	0.63608	3.53958	0.89518	3.88434	0.57857	3.95619	0.59536	3.83296	0.60777	3.88393	0.56512
2	adult	3.7056	0.6471	3.97805	0.63791	3.89693	0.84584	3.88486	0.57397	3.96716	0.57478	3.70093	0.64834	3.84448	0.54455
2	adult	3.66453	0.59487	3.69987	0.60967	3.89084	0.77064	3.87284	0.55459	4.17751	0.57057	3.67897	0.58592	4.00705	0.53424
2	adult	3.72128	0.67029	4.06059	0.66363	3.72847	0.73369	3.70184	0.55161	4.00477	0.5164	3.70058	0.57969	3.59378	0.58422
2	adult	3.71711	0.47892	4.04853	0.5603	4.0383	0.62947	3.95596	0.53796	3.89355	0.51105	3.80307	0.54181	3.55611	0.4907
2	adult	3.58598	0.62038	4.0314	0.6348	3.93496	0.72372	3.70372	0.52101	4.0103	0.52396	3.85444	0.57347	3.66236	0.56594
2	adult	3.80506	0.58901	3.9826	0.61659	3.91416	0.78206	3.95215	0.54164	4.0631	0.50185	3.9377	0.64362	3.84741	0.48175
2	adult	3.74272	0.6602	3.92582	0.63869	3.81995	0.8914	4.09721	0.60858	0.72635	0.59163	3.86923	0.62838	3.66305	0.4992
2	adult	3.81952	0.65024	4.0844	0.6318	3.73005	0.8471	3.90399	0.56243	4.06745	0.57609	3.81821	0.63277	3.89828	0.52236
2	adult	3.68097	0.60116	3.71608	0.56719	3.82266	0.8102	3.8506	0.56699	3.89319	0.50127	3.80948	0.61572	3.84503	0.55351
2	adult	3.62094	0.59229	4.08092	0.62476	3.92802	0.75097	3.83789	0.55149	4.11971	0.5753	3.91563	0.71542	4.06189	0.5681
2	adult	3.64973	0.57835	3.9754	0.61078	3.91214	0.74143	3.82261	0.59921	4.19384	0.57267	3.82244	0.56684	4.02879	0.523
2	adult	3.69094	0.59242	3.86337	0.60987	3.92691	0.71237	3.99851	0.56546	4.07364	0.55656	3.73939	0.59412	3.73307	0.45457
2	adult	3.82528	0.55677	3.93393	0.61874	3.97863	0.72679	3.89995	0.57989	4.03274	0.54076	3.79057	0.57207	3.93418	0.51686
2	adult	3.77398	0.54268	4.10416	0.55735	3.89963	0.58247	3.94869	0.59667	4.13	0.49697	3.66378	0.58417	3.50134	0.48938
2	adult	3.8435	0.61214	4.1342	0.67366	3.92707	0.86132	4.04569	0.60858	3.65265	0.59751	3.84273	0.63324	3.85643	0.4964
2	adult	3.94696	0.61745	3.9281	0.61469	3.62493	0.77775	3.94736	0.57825	4.13931	0.56823	4.00272	0.63767	3.90981	0.48928
2	adult	3.81292	0.60975	3.96573	0.61493	3.9886	0.8532	3.81402	0.54414	4.0916	0.52885	3.92208	0.61753	3.8601	0.52678
2	adult	3.78898	0.56248	3.91754	0.64772	3.84887	0.74589	3.84268	0.55747	4.14482	0.52538	3.72174	0.60595	3.83576	0.56126
2	adult	3.82085	0.57575	3.99646	0.64185	3.99812	0.80359	3.91729	0.57467	4.24964	0.52542	3.86199	0.72424	3.88948	0.52855
2	adult	3.60648	0.48986	3.88299	0.56703	3.89996	0.53378	3.70044	0.52238	3.86745	0.49378	3.6606	0.59716	3.51398	0.49307
2	adult	3.76022	0.58885	4.10126	0.65193	3.90505	0.77949	3.7531	0.55779	4.15018	0.53936	3.74619	0.54298	3.88867	0.51203
2	adult	4.00662	0.64635	4.11281	0.63364	3.918	0.74948	3.94916	0.55721	4.01701	0.54808	3.90388	0.60995	3.89462	0.52727
2	adult	3.73976	0.60447	3.93525	0.66013	3.77461	0.80537	4.00883	0.5563	3.86857	0.51176	3.90828	0.64818	3.79494	0.48237
2	adult	3.70618	0.62456	4.01279	0.5909	3.67683	0.8584	3.98117	0.57069	4.04225	0.59608	3.92734	0.6544	3.80202	0.50064
2	adult	3.70153	0.67791	3.97966	0.61319	3.91481	0.81414	3.82653	0.53083	4.1442	0.57836	3.71901	0.61507	3.79702	0.56508
2	adult	3.60774	0.56423	3.86794	0.58103	3.86936	0.68831	3.77504	0.53033	4.1292	0.5159	3.82529	0.56669	3.82127	0.50602
2	adult	3.44031	0.59212	4.04823	0.57592	3.73081	0.57927	3.10426	0.59295	3.99887	0.51477	3.61037	0.58584	3.27082	0.56525
2	adult	4.05597	0.52569	4.01736	0.55731	3.97727	0.5937	3.84858	0.55669	4.05864	0.51608	3.89898	0.59174	3.79504	0.50068
2	adult	3.96583	0.5297	3.94498	0.62655	3.85233	0.66953	3.93191	0.56275	4.09554	0.47739	3.76368	0.58098	3.99446	0.50873
2	adult	1.13345	0.79997	0.22358	0.42498	0.23252	0.45908	0.7703	0.497	0.21111	0.41763	0.25178	0.4698	0.2111	0.42974
2	adult	3.59444	0.50825	3.88894	0.57652	3.83972	0.58388	3.95562	0.75545	4.10335	0.5387	3.73061	0.62658	3.61178	0.51873
2	adult	3.81359	0.70023	4.04782	0.65497	3.83862	0.88614	3.90214	0.59491	4.24583	0.59566	3.67246	0.77055	3.94298	0.56173
2	adult	3.85516	0.62923	3.99201	0.58224	3.69564	0.78287	3.56689	0.76341	3.84326	0.53307	3.70461	0.75411	3.94492	0.50045
2	adult	3.75957	0.53364	4.09599	0.62764	3.77703	0.69597	3.98721	0.55984	4.19107	0.58586	3.73589	0.56115	3.81143	0.55436
2	adult	3.77955	0.57073	3.94234	0.60574	3.89979	0.70322	3.86447	0.54442	4.16276	0.55637	3.81	0.58716	3.87831	0.54955
2	adult	3.73477	0.66253	3.98606	0.62127	3.83269	0.73473	3.62853	0.52688	4.24346	0.56473	3.74432	0.63176	3.83051	0.5173
2	adult	3.9812	0.52444	4.18185	0.62891	3.98824	0.68757	3.96218	0.54798	4.29808	0.53734	3.98984	0.60645	3.91703	0.50799
2	adult	3.93016	0.59524	4.22878	0.60888	3.96174	0.67153	3.79991	0.53606	4.07414	0.50403	3.80169	0.63649	3.82707	0.51045
2	adult	3.63077	0.58097	3.74797	0.61304	3.87018	0.79648	4.01999	0.61995	4.15238	0.56724	3.81342	0.49644	3.8514	0.53706
2	adult	4.01182	0.67692	4.05942	0.61593	3.82018	0.85248	3.84451	0.55203	4.11423	0.56531	3.99337	0.63823	4.01555	0.61507
2	adult	3.8063	0.57793	3.9882	0.60801	3.83491	0.80096	3.93708	0.56107	3.99167	0.5466	3.80951	0.58618	3.81521	0.50234
2	adult	4.13855	0.62432	4.07499	0.63864	3.94735	0.71308	3.95556	0.59343	4.07677	0.56385	3.83425	0.6395	3.95671	0.53111
2	adult	3.92558	0.59849	4.25189	0.62279	3.89487	0.72649	3.6178	0.73183	4.24451	0.56736	3.81737	0.68934	3.91126	0.50964
2	adult	3.6063	0.65669	3.98372	0.62089	3.90039	0.71874	3.41439	1.0204	4.15326	0.54739	3.75983	0.66252	3.73142	0.49334
2	adult	3.89125	0.55536	4.03407	0.5708	3.99488	0.69019	4.08264	0.61747	4.26991	0.55361	3.88782	0.59621	3.86909	0.50382
2	adult	3.97021	0.62177	4.05127	0.65363	3.88786	0.74604	3.78767	0.52987	4.22444	0.53556	3.87088	0.79706	4.04999	0.64603
2	adult	3.89545	0.64416	4.13392	0.6982	3.83639	0.8512	3.88348	0.78328	4.06254	0.52105	3.90432	0.59563	3.75682	0.52932
2	adult	3.89945	0.60601	4.07105	0.62952	3.77719	0.80439	3.83777	0.85279	4.14484	0.6067	3.74638	0.69229	3.82222	0.53711
2	adult	3.77244	0.60813	3.93531	0.58075	3.77695	0.82812	4.02314	0.56922	4.01706	0.53762	3.96078	0.70578	3.8109	0.52822
2	adult	3.95831	0.60725	4.17364	0.61926	3.84882	0.77501	3.95115	0.55959	4.11261	0.54383	3.89696	0.66067	3.82319	0.51743
2	adult	3.77303	0.67547	4.09195	0.60743	4.0417	0.83174	3.8186	0.53403	4.11712	0.53306	4.00721	0.69811	3.75189	0.51984
2	adult	3.93877	0.68318	4.10375	0.62956	3.84513	0.74548	3.91754	0.56154	4.09645	0.56327	3.83031	0.61679	3.77661	0.52408
2	adult	3.60357	0.64752	3.80921	0.83122	3.82522	0.76228	4.04684	0.53669	4.16348	0.55368	3.83251	0.64909	3.84462	0.50411
2	adult	3.65601	0.61112	4.14813	0.69367	3.88478	0.77573	3.94183	0.53204	4.07591	0.56129	3.95114	0.73552	4.06268	0.56141
2	adult	3.71458	0.64323	4.04368	0.7673	3.87832	1.01278	4.07438	0.6406	4.23514	0.59149	4.04079	0.70165	3.80031	0.58895
2	adult	3.80554	0.78679	3.95625	0.77217	3.74728	1.10932	4.04722	0.65741	3.92663	0.66074	3.7782	0.71577	3.8786	0.55959
2	adult	3.69064	0.61526	4.05329	0.69863	3.88954	0.96142	3.88029	0.71611	3.98842	0.59181	3.75663	0.66049	3.88808	0.54211
2	adult	3.97707	0.62807	4.01729	0.65675	3.74285	0.95311	3.72406	0.80527	4.09476	0.61076	3.84537	0.83029	3.90267	0.55219
2	adult	3.8813	0.71324	4.07208	0.74534	3.83016	1.08474	3.97922	0.67109	4.09014	0.60182	3.86742	0.69572	3.84932	0.51048
2	adult	2.85299	0.52839	3.30418	0.48289	3.35601	0.56728	3.09725	0.50079	3.96912	0.54789	0.29424	2.86455	3.29645	0.52437
2	adult	3.59135	0.68537	4.13307	0.76833	3.69536	1.02782	3.864	0.769	4.05252	0.61834	3.95337	0.89167	3.99366	0.52712
2	adult	3.90323	0.62388	4.11985	0.68564	3.93089	0.81827	3.88376	0.58571	4.08694	0.56997	3.86595	0.71363	4.00992	0.63428
2	adult	3.88868	0.64052	4.06713	0.69839	3.85099	0.98286	4.00103	0.72897	4.16198	0.55	3.95239	0.76042	3.84193	0.52348

## Sheet: Run345
Run	LifeStage	abl_c	abl_m	dlgap_c	dlgap_m	edc4_c	edc4_m	eif4ebp2_c	eif4ebp2_m	ngef_c	ngef_m	phf_c	phf_m	slc5_c	slc5_m
345	adult	0.18394	3.85416	0.28405	3.72713	0.15339	3.95309	0.26281	3.86893	0.43466	4.01988	0.41193	3.73491	0.17182	3.96666
345	adult	0.16256	3.85016	0.27665	3.85056	0.17194	3.78039	0.35209	3.64208	0.32789	3.68891	0.44978	3.62606	0.21754	3.86311
345	adult	0.16301	3.95647	0.25841	3.8137	0.17304	3.85887	0.33525	3.58645	0.30295	3.79913	0.42625	3.5894	0.19334	3.92716
345	adult	0.16194	3.79041	0.25518	3.7832	0.15716	3.63552	0.29547	3.87141	0.31134	3.61135	0.37107	3.77188	0.18075	3.81538
345	adult	0.16885	3.93081	0.28147	3.8297	0.16168	3.87325	0.31142	3.83474	0.31977	3.9189	0.39479	3.64181	0.18336	3.93917
345	adult	0.17759	3.86988	0.23467	4.00267	0.17509	3.91447	0.30153	3.63343	0.36681	4.17866	0.39271	3.72379	0.20152	3.83635
345	adult	0.17366	3.83649	1.25977	3.68628	0.15829	3.86741	0.49542	3.6751	0.37804	3.69922	0.46321	3.72995	0.18502	3.80384
345	adult	0.16014	3.91584	0.27015	4.00005	0.15522	4.05156	0.2792	3.86895	0.3654	3.65126	0.41119	3.57141	0.20396	3.75101
345	adult	0.20553	4.11647	0.2326	3.93031	0.16743	3.92142	0.29271	3.89961	0.3393	3.88029	0.42244	3.61353	0.18899	3.70575
345	adult	0.19328	4.16843	0.22572	4.04673	0.16248	3.90867	0.27675	3.90168	0.35459	3.86837	0.36064	3.65568	0.1895	3.93523
345	adult	0.18241	4.17429	0.20307	0.48154	0.15154	3.87001	0.25541	3.81654	0.37035	4.15233	0.32046	3.92709	0.1695	3.81908
345	adult	0.1663	3.82803	0.21712	3.90016	0.15759	3.98844	0.28488	3.85628	0.34502	4.13718	0.37017	3.61477	0.1886	3.84714
345	adult	0.17776	3.59244	0.24016	3.68754	0.16239	3.84734	0.30307	3.75797	0.31494	3.71107	0.40406	3.62311	0.19671	3.7664
345	adult	0.16819	4.06228	0.25	3.86244	0.16695	3.82856	0.27972	3.7055	0.32236	3.51758	0.37032	3.74403	0.20011	3.75433
345	adult	0.16572	3.7107	0.1674	3.55131	0.15404	3.7369	0.19837	3.73414	0.29339	3.88511	0.28012	3.85233	0.16858	3.85812
345	adult	0.25137	0.45317	0.19878	3.47207	0.21686	0.4126	0.21082	0.44377	0.20448	0.42884	0.19421	0.41234	0.19763	0.38134
345	adult	0.16997	3.94111	0.21957	3.68571	0.16146	3.93917	0.32942	4.28545	0.29624	3.87402	0.37219	3.87804	0.18277	3.88927
345	adult	0.15931	3.88134	0.24333	3.91825	0.16134	4.11677	0.34315	4.22276	0.29141	3.93646	0.42572	4.02677	0.1934	3.9344
345	adult	0.16247	4.06348	0.23707	3.83504	0.16498	3.89563	0.31177	3.79491	0.39131	3.76822	0.42328	3.69842	0.20773	3.89765
345	adult	0.1644	3.79781	0.21152	3.95565	0.17341	3.92256	0.29444	3.91016	0.32719	4.2323	0.36328	3.60548	0.186	3.75316
345	adult	0.16845	4.08845	0.23133	3.99667	0.16432	4.03715	0.2087	3.91844	0.33998	3.95576	0.35844	3.69292	0.19231	3.7396
345	adult	0.1759	3.29422	0.2036	3.0995	0.17038	3.4293	0.1964	2.89471	0.20036	4.12976	0.22328	2.44902	0.17681	3.27699
345	adult	0.16643	3.73658	0.20135	4.17731	0.1513	3.8399	0.27947	3.74951	0.31749	4.05704	0.31402	3.58106	0.17218	3.76338
345	adult	0.20002	3.65464	0.25968	3.94047	0.17073	4.05985	0.28524	3.78706	0.30148	3.78707	0.35576	3.75216	0.18606	3.93459
345	adult	0.15293	3.5943	0.1979	3.69738	0.14809	3.78699	0.22035	3.6961	0.30423	3.92303	0.30502	3.79452	0.16181	3.66607
345	adult	0.1609	3.89368	0.18742	3.79256	0.15696	3.87488	0.22478	3.79237	0.34763	4.04202	0.34916	3.60543	0.18034	3.8834
345	adult	0.15988	4.0554	0.23428	3.71588	0.16549	3.93329	0.32085	3.81893	0.29195	3.89769	0.37912	3.9159	0.17587	3.80883
345	adult	0.15826	4.02895	0.18006	4.03001	0.33362	3.73638	0.25395	3.82156	0.31522	3.73277	0.23106	3.79471	0.1644	3.81981
345	adult	0.15259	3.88494	0.18914	3.99654	0.16501	4.05152	0.22539	4.24161	0.33731	3.79211	0.30883	3.75112	0.17314	3.85078
345	adult	0.17845	4.07016	0.29345	3.77013	0.16503	4.00823	0.43475	3.92006	0.38148	3.74171	0.47952	3.6358	0.20075	3.87683
345	adult	0.2246	0.47405	0.21798	0.43452	0.14568	3.78124	0.18801	3.66416	0.22053	3.5894	0.21223	3.19881	0.17047	3.54938
345	adult	0.17168	3.75849	0.23213	3.90234	0.15606	3.6531	0.33302	4.27517	0.32094	4.41395	0.35493	3.75621	0.22343	3.98624
345	adult	0.16428	3.91319	0.19095	3.90321	0.14625	3.83398	0.23295	3.75391	0.28408	3.84894	0.22021	3.54358	0.17738	3.68584
345	adult	0.1882	3.82788	0.22181	3.7297	0.17019	3.95045	0.26947	3.61132	0.3126	4.21417	0.32219	3.89591	0.18569	3.89912
345	adult	0.17521	4.00621	0.23609	3.65835	0.14579	3.65632	0.32649	3.65094	0.30665	3.9023	0.35666	3.57297	0.18942	3.82434
345	adult	0.16547	3.65473	0.19005	3.45961	0.1652	3.76482	0.26046	3.70594	0.31509	3.73509	0.30471	3.77029	0.18517	3.67457
345	adult	0.16377	3.66309	0.28346	3.7776	0.16242	3.77309	0.26614	4.00136	0.3332	4.08896	0.32066	3.66657	0.17954	3.82953
345	adult	0.17398	3.74788	0.22282	4.05259	0.15607	3.84048	0.30703	3.77721	0.59378	3.84683	0.43084	3.59622	0.18549	3.77299
345	adult	0.17124	3.93561	0.23741	4.02088	0.16189	4.0347	0.26974	3.86469	0.30469	3.8759	0.35104	3.73285	0.1915	3.92653
345	adult	0.18565	3.87356	0.31772	4.07876	0.16291	3.84077	0.34964	3.9313	0.33419	3.82138	0.46747	3.85402	0.18765	3.78161
345	adult	0.18619	4.1378	0.30708	3.83692	0.58923	3.7454	0.30224	3.95964	0.70053	3.73916	0.38252	3.80067	0.28896	3.78167
345	adult	0.18533	3.9111	0.51169	2.93082	0.16951	3.89002	0.37825	3.61849	0.39324	3.85282	0.51247	3.62275	0.42262	3.60229
345	adult	0.25101	3.70953	0.20942	4.0019	0.58292	3.77303	0.67238	3.58012	0.32657	4.00387	0.22664	2.78919	0.18975	3.8149
345	adult	4.01658	0.70909	4.16901	0.77269	3.71724	0.86607	4.05628	0.50938	3.87713	0.62038	3.9153	0.61448	4.03331	0.59286
345	adult	3.26466	0.56958	0.2672	0.43791	3.82176	0.73293	3.49939	0.51484	4.32232	0.58049	3.51182	0.50791	3.75653	0.51571
345	adult	3.52316	0.65199	3.75141	0.52424	0.58053	0.51403	3.31597	0.46162	3.86554	0.48115	3.55819	0.49942	0.22644	0.44615
345	adult	3.37427	0.59272	1.85238	0.51271	3.32744	0.73341	1.20728	1.25816	0.22215	0.44595	3.58449	0.51285	0.22452	0.43643
345	adult	0.23232	0.47207	0.23862	0.5051	3.61555	0.64129	0.25177	0.5325	0.24644	0.47225	0.22735	0.43644	0.22338	0.44405
345	adult	3.69407	0.60153	4.0087	0.73342	3.88542	0.97085	3.89491	0.60222	3.98311	0.55451	3.71356	0.67637	3.79617	0.54273
345	adult	3.85993	0.72588	3.93334	0.74469	3.74532	0.95475	3.96756	0.57495	4.13243	0.69117	3.95181	0.66286	3.98501	0.55903
345	adult	3.64291	0.71173	3.94279	0.63323	3.77266	0.9133	3.95556	0.53461	3.94693	0.65721	3.89844	0.68454	4.07236	0.61475
345	adult	3.8431	0.74864	3.81382	0.61312	3.59697	0.90689	3.81192	0.54256	4.07847	0.58464	3.75885	0.64618	3.97903	0.5288
345	adult	3.61481	0.70556	3.91712	0.60539	3.56355	0.80678	4.04693	0.54838	3.93902	0.4587	3.56919	0.68381	3.79447	0.56221
345	adult	3.78247	0.69219	3.91715	0.58591	3.88555	0.87554	3.45493	0.87586	3.81502	0.51781	3.8739	0.61559	3.93416	0.56803
345	adult	3.64433	0.64507	3.99063	0.652	3.79323	0.78845	3.8371	0.52494	4.1158	0.58792	3.57528	0.80294	3.88256	0.57594
345	adult	3.75351	0.65693	4.07711	0.61676	3.71321	0.77542	3.82057	0.5482	4.0463	0.54629	3.92007	0.60935	3.87998	0.57998
345	adult	3.55178	0.62352	3.75789	0.84051	3.74663	0.73235	3.75298	0.53713	3.96331	0.58067	3.85725	0.59791	3.96393	0.56439
345	adult	3.75941	0.84741	3.92346	0.71046	3.73845	0.91448	3.89961	0.64749	4.01371	0.63943	3.83011	0.66376	3.72596	0.69206
345	adult	3.7398	0.86393	3.93587	0.85229	3.52729	1.14576	3.86158	0.69497	4.08557	0.68768	3.8922	0.75834	3.76885	0.60089
345	adult	3.69823	0.76322	3.89777	0.77613	3.48187	0.99213	3.90624	0.63739	3.93892	0.6155	3.80262	0.68815	4.20594	0.64083
345	adult	3.63618	0.76991	3.93253	0.73083	3.5696	1.10971	3.90428	0.66334	4.10012	0.57897	3.94168	0.68064	3.89933	0.53443
345	adult	3.64212	0.75335	3.66199	0.95922	3.70927	1.00801	3.79009	0.58362	4.17259	0.59652	3.80518	0.68209	3.89964	0.56054
345	adult	3.7917	0.79333	3.86219	0.74906	3.57866	1.06091	3.93641	0.6351	4.07035	0.59701	3.99985	0.63875	4.00192	0.62149
345	adult	3.75383	0.79383	3.87742	0.79188	3.71103	1.00648	3.87775	0.65364	4.10559	0.62151	3.85473	0.67477	3.72664	0.55112
345	adult	3.84226	0.75035	3.98252	0.75963	3.65978	0.97034	4.04469	0.67556	3.96577	0.61954	3.93914	0.72724	3.95641	0.68812
345	adult	3.83181	0.76348	3.94005	0.78097	3.52598	1.02522	3.64691	1.18082	4.03631	0.61093	3.86352	0.64069	3.84843	0.57491
345	adult	3.81063	0.76639	3.99531	0.66147	3.76019	1.02452	4.09026	0.56134	3.90309	0.57207	3.91384	0.63932	4.01504	0.58323
345	adult	3.77119	0.73323	3.91228	0.65843	3.67841	0.9596	3.82164	0.58454	4.01987	0.5513	3.80485	0.62814	3.85472	0.60527
345	adult	0.22293	0.41674	2.73448	1.58283	2.438	0.48089	0.24194	0.42795	0.23572	0.4498	0.23075	0.43393	0.22977	0.46454
345	adult	3.7929	0.81726	4.16877	0.63166	3.66639	0.89603	3.92224	0.53147	3.81952	0.61866	3.79598	0.63532	3.69193	0.63969
345	adult	3.62812	0.61238	3.90131	0.59389	3.6475	0.84554	3.95116	0.48655	3.70214	0.62527	3.70702	0.55009	3.64869	0.6777
345	adult	3.81024	0.68326	3.95927	0.65795	3.51421	0.94493	3.84816	0.53319	3.63382	0.69107	4.07464	0.54953	2.97715	1.20296
345	adult	3.35624	0.56612	3.95712	0.64526	1.97478	2.18922	2.87061	0.46825	3.24463	1.21737	3.85301	0.55681	3.84892	0.53844
345	adult	3.60792	0.82942	3.73448	0.81104	3.51626	1.28904	3.91144	0.67166	3.90741	0.59856	3.77953	0.77956	3.8807	0.60571
345	adult	3.62254	0.79652	3.77764	0.84032	3.64248	1.21932	3.64123	0.64517	3.92889	0.59346	3.84067	0.77237	3.80819	0.59758
345	adult	3.70732	0.9601	3.83612	0.79335	3.52714	1.1171	3.91372	0.75007	4.02408	0.69674	3.63399	0.67608	3.98823	0.63743
345	adult	3.72725	0.82655	3.90629	0.78064	3.64202	1.25101	3.98929	0.69328	3.94696	0.65618	3.72959	0.73949	3.9021	0.59245
345	adult	4.05297	0.69597	4.01037	0.58698	3.72756	0.81701	3.89288	0.49445	4.11711	0.57595	4.15175	0.65299	3.96974	0.59643
345	adult	3.72779	0.74602	3.9509	0.67695	3.46064	0.97509	3.91809	0.52315	4.09776	0.5352	4.18166	0.66102	3.86893	0.60678
345	adult	3.98809	0.74286	3.92364	0.65978	3.70538	0.89139	3.97388	0.49832	3.93182	0.65831	3.94591	0.66267	3.83981	0.50334
345	adult	3.67647	0.64502	4.10133	0.87794	3.72378	0.85777	3.94745	0.56223	4.01239	0.55137	3.95173	0.61537	3.81801	0.501
345	adult	3.51907	0.60845	3.80908	0.53592	3.76172	0.79924	3.56361	0.45805	3.92518	0.5249	3.927	0.57345	3.86396	0.55052
345	adult	3.66115	0.60099	4.0388	0.54606	3.87364	0.8461	3.78184	0.5491	3.794	0.50557	3.90122	0.6172	3.88924	0.51693
345	adult	1.57285	2.38945	2.50339	2.03815	2.30009	2.03644	3.2264	0.51379	3.41365	1.15837	1.89044	1.9765	1.6191	2.19598
345	adult	3.79896	0.72412	4.04092	0.57175	3.96333	0.84482	3.86533	0.52218	4.08911	0.55019	3.966	0.56342	3.91254	0.57083
345	adult	3.87196	0.6297	4.09977	0.58933	3.63611	0.81948	3.42083	0.63053	4.05731	0.58038	3.80018	0.54734	3.98247	0.57902
345	adult	3.74636	0.58421	4.04181	0.644	3.68289	0.75162	3.98796	0.49946	4.11295	0.51641	4.04635	0.54986	3.93576	0.58166
345	adult	4.05928	0.6247	4.02264	0.68831	3.84318	0.79298	3.81311	0.75609	4.13374	0.51649	3.89888	0.57434	4.02656	0.53534
345	adult	3.59373	0.61258	3.94644	0.56815	3.8163	0.72651	3.76766	0.48476	4.08708	0.51087	3.87817	0.64052	3.97478	0.49464
345	adult	3.90033	0.77379	3.90352	0.63334	3.67917	0.77937	4.1152	0.68979	4.14799	0.5678	3.89895	0.5675	4.03241	0.46375
345	adult	3.82157	0.83758	3.87646	0.80346	3.9427	0.88059	3.97005	0.59832	4.08674	0.65126	3.67141	0.92247	3.91221	0.46864
345	adult	0.3569	3.50541	0.46723	3.71855	0.22051	3.81336	0.78763	3.74579	0.57759	3.76181	0.82635	3.35007	0.31636	3.90579
345	adult	0.25029	3.9229	0.43534	3.68417	0.22096	3.83971	0.78446	3.9553	0.65608	4.00919	0.84084	3.34863	0.28187	3.7375
345	adult	0.24975	4.00124	0.39931	3.52067	0.22454	3.78973	0.786	3.76787	0.52331	3.70081	0.7854	3.46757	0.31218	3.80495
345	adult	0.20546	3.86642	0.3275	3.729	0.17239	3.77162	0.39593	3.67752	0.31975	3.60033	0.43844	3.59259	0.19777	3.80433
345	adult	0.20886	3.55455	0.31965	3.64053	0.16766	3.67123	0.36577	3.90953	0.33231	3.80593	0.4519	3.6744	0.19492	3.81529
345	adult	0.18575	3.81627	0.33805	3.73684	0.20826	3.69922	0.35561	3.89153	0.30632	4.12996	0.42239	3.66326	0.18712	3.69384
345	adult	0.19288	3.93848	0.29212	3.58721	0.16386	3.84711	0.32827	3.76045	0.32378	4.09196	0.44988	3.61746	0.17684	3.57454
345	adult	0.19832	3.77652	0.29704	3.76563	0.16843	3.78717	0.35281	3.79315	0.3312	3.76283	0.40855	3.65875	0.17945	3.7136
345	adult	0.19914	4.09661	0.3189	3.78819	0.17256	3.71095	0.32704	3.88924	0.30758	3.75012	0.40375	3.59649	0.1872	3.87134
345	adult	0.19633	4.07715	0.28024	4.05235	0.16843	3.83199	0.34649	3.68564	0.28204	3.92437	0.42603	3.44171	0.1905	3.94165
345	adult	0.18677	3.88405	0.32795	4.29491	0.18595	4.00191	0.45317	3.91367	0.32814	3.62392	0.51948	3.54711	0.20734	3.59647
345	adult	0.19618	4.02428	0.21799	3.60221	0.1754	3.58237	0.31157	3.76837	0.32983	3.51774	0.40324	3.55356	0.20339	4.02123
345	adult	0.17762	3.8164	0.26659	3.6946	0.16157	3.53371	0.41246	3.76438	0.28713	3.69455	0.39328	3.68781	0.18899	3.52596
345	adult	0.18186	3.81717	0.25913	4.01547	0.16403	4.0081	0.33772	3.82655	0.27063	3.63184	0.40274	3.73424	0.18596	3.95817
345	adult	0.17324	3.96291	0.2505	4.11431	0.15783	3.94992	0.34832	4.00061	0.30294	3.93701	0.39084	3.73495	0.18465	3.81623
345	adult	0.18037	4.07404	0.25665	3.83062	0.16753	3.80466	0.31955	3.75099	0.29479	3.94306	0.32486	3.94586	0.21841	3.93566
345	adult	0.15396	3.72591	0.25991	3.78629	0.15928	3.85738	1.6391	2.08411	0.30444	3.76238	0.45381	3.76382	0.17954	3.74575
345	adult	0.1745	3.84856	0.27778	3.64445	0.22099	3.85126	0.26611	3.7083	0.37078	3.93305	0.35751	3.57227	0.1844	3.7276
345	adult	0.19273	4.63244	0.30693	3.95782	0.1607	3.76174	0.42468	3.76469	0.37273	3.73275	0.66234	3.48635	0.21826	3.85479
345	adult	0.17602	3.67401	0.21768	3.8809	0.14452	3.70454	0.22606	3.95158	0.2848	3.77022	0.28545	3.62315	0.17189	3.79114
345	adult	0.20042	4.09426	0.38798	4.05633	0.17841	3.77106	0.43137	4.03362	0.32016	3.84381	0.51258	3.61488	0.21923	3.74092
345	adult	2.63904	2.40198	2.72535	2.45138	2.58677	2.37588	2.1808	2.785	2.93016	2.1216	2.28659	2.43089	2.21883	2.26135
345	adult	3.58114	0.68727	3.84121	0.70272	3.53168	0.62575	3.1634	0.48351	3.90176	0.52827	3.66784	0.57512	3.63589	0.5231
345	adult	3.65562	0.70046	4.19152	0.66309	3.70282	0.81882	3.67553	0.52763	3.98465	0.59835	3.72101	0.64846	3.84929	0.55692
345	adult	2.6737	0.54165	3.86164	0.56486	0.25061	0.49444	3.52927	0.56358	3.90092	0.55671	3.75364	0.59562	3.4834	0.52362
345	adult	2.94482	0.53332	0.21634	0.57085	0.28792	0.51828	0.23753	0.51432	0.24429	0.45649	0.2352	0.47689	0.21751	0.40019
345	adult	3.84234	0.66625	3.8219	0.56723	3.73933	0.73933	3.51141	0.70873	3.99501	0.55199	3.8886	0.61912	3.62941	0.52201
345	adult	3.57701	0.63539	4.00237	0.58844	3.66103	0.73648	3.75726	0.50447	3.89829	0.45307	3.90977	0.50564	3.69092	0.54754
345	adult	3.7944	0.74973	3.92642	0.60104	3.65161	0.78562	3.73487	0.51834	4.04936	0.5374	4.02319	0.64447	3.80841	0.5487
345	adult	3.74003	0.67691	3.95995	0.59414	3.79027	0.7036	3.12073	0.57917	4.04067	0.50333	3.7667	0.54565	3.77643	0.51558
345	adult	3.91136	0.61493	3.90285	0.62665	3.82773	0.83867	3.78069	0.49086	4.1337	0.58415	4.07881	0.64038	3.96129	0.51698
345	adult	3.86956	0.66132	4.22179	0.70147	3.86518	0.81201	3.93552	0.54596	4.12884	0.55967	4.00142	0.61138	3.8828	0.58262
345	adult	3.61506	0.68672	4.07924	0.65654	3.65273	0.93107	3.8402	0.548	4.0802	0.59944	4.05435	0.64506	4.05591	0.53343
345	adult	2.36507	0.6832	0.20086	0.4804	3.39266	0.64447	3.52408	0.52196	3.11237	1.52311	3.04699	0.52655	2.71775	0.50569
345	adult	3.95163	0.66418	4.05846	0.64215	3.91636	0.72443	3.71608	0.9475	4.08007	0.60841	3.86163	0.65257	3.97002	0.58138
345	adult	2.92766	0.57014	3.95329	0.54438	3.49101	0.73374	3.2701	0.50232	4.0379	0.57923	1.58461	0.477	3.58468	0.50263
345	adult	3.62266	0.6657	4.16524	0.66528	3.82665	0.78267	3.92272	0.54835	4.20203	0.55018	3.97567	0.54737	3.86912	0.54884
345	adult	3.78346	0.66713	4.06987	0.63832	3.69259	0.86396	3.8425	0.52263	4.31806	0.63788	3.96118	0.58644	3.98229	0.56361
345	adult	2.40532	1.67291	0.22113	0.48238	2.63431	1.42461	3.3309	0.4842	4.09649	0.48843	2.42247	0.48811	1.90971	1.91984
345	adult	3.95087	0.74329	4.21093	0.6978	3.79582	0.81489	3.84182	0.67341	4.01347	0.57121	3.94987	0.55708	4.0126	0.59758
345	adult	3.89074	0.82159	4.01322	0.62449	3.76979	0.76539	3.87497	0.5395	4.04999	0.51735	3.89392	0.58438	3.90626	0.57473
345	adult	3.75855	0.71386	3.9147	0.58999	3.78063	0.84892	3.81149	0.52898	4.073	0.62946	3.83092	0.59732	3.84236	0.53961
345	adult	0.16422	3.75099	0.17147	3.85902	0.17376	3.86801	0.19589	3.78068	0.29128	3.69308	0.27205	3.61702	0.18265	3.94829
345	adult	3.51612	0.60716	3.79234	0.5386	3.47473	0.59079	3.22297	0.4805	3.9107	0.57451	3.50344	0.50985	3.52343	0.59317
345	adult	3.80188	0.73709	4.10618	0.65118	3.72249	0.83653	3.908	0.60921	3.91542	0.65356	4.00307	0.63632	3.91176	0.50567
345	adult	3.87763	0.66893	4.03113	0.60879	3.86137	0.88181	4.02866	0.55727	4.09627	0.65517	3.92565	0.60118	3.87035	0.57459
345	adult	3.95308	0.75817	3.95789	0.73717	3.67323	0.93552	4.11876	0.54951	4.19794	0.57121	3.99948	0.63736	3.69891	0.71352
345	adult	1.75743	2.37174	3.99962	0.59609	3.84404	0.72461	1.92443	0.47832	4.06615	0.50808	3.41137	0.54839	3.74528	0.54491
345	adult	3.65006	0.63455	3.91471	0.55543	3.63851	0.66486	3.67205	0.48763	4.04237	0.52529	3.81687	0.55584	3.55847	0.5007
345	adult	3.67517	0.677	3.92713	0.62128	3.7581	0.79031	3.62304	0.54814	4.02324	0.49564	3.34088	0.51979	3.60411	0.53134
345	adult	3.67394	0.6339	3.90193	0.58204	3.65315	0.82547	3.78686	0.49766	3.96619	0.51709	3.97894	0.59025	3.8861	0.48207
345	adult	3.52606	0.60771	3.75672	0.60693	3.70056	0.74352	3.74215	0.52941	3.9017	0.54468	4.03914	0.60743	3.33239	0.93817
345	adult	3.92628	0.66904	4.05658	0.70633	3.90858	0.75194	3.84328	0.5591	3.99835	0.55935	4.01994	0.67134	4.00796	0.51555
345	adult	3.84358	0.75039	4.07855	0.69019	3.70651	0.89615	3.84039	0.54772	4.08245	0.56267	3.81258	0.58951	3.84487	0.50637
345	adult	3.95441	0.75358	4.03914	0.76061	3.73885	0.9296	3.92961	0.5147	4.03466	0.53289	3.95172	0.62162	4.0107	0.5214
345	adult	2.40155	0.53168	3.83815	0.59999	3.8641	0.8819	4.02368	0.5638	3.9426	0.84484	3.76186	0.58259	3.87134	0.52395
345	adult	3.80276	0.70858	4.10523	0.70523	3.75071	0.86522	3.96646	0.62229	4.04717	0.6389	3.85601	0.62586	4.01858	0.57777
345	adult	3.49106	0.62887	4.04488	0.64786	0.23569	0.45716	3.77726	0.58482	3.98352	0.53226	3.0285	0.52774	3.19444	0.52327
345	adult	3.81553	0.69719	3.85532	0.61182	3.79273	0.85902	3.98555	0.56249	4.106	0.5523	3.91763	0.6333	3.74463	0.53794
345	adult	3.86481	0.6866	4.06026	0.60045	3.68797	0.83235	3.92387	0.54185	3.88397	0.5123	3.91361	0.62702	3.96886	0.54559
345	adult	3.69461	0.73655	3.82826	0.64179	3.86609	0.94128	3.99034	0.5703	3.99537	0.5452	3.8312	0.57578	3.71796	0.51247
345	adult	3.88019	0.69236	3.838	0.63877	3.5407	0.96063	3.87389	0.58785	3.9593	0.58724	3.91867	0.67486	3.91841	0.61649
345	adult	3.82515	0.68545	3.89187	0.66492	3.66257	0.88718	3.95339	0.57963	4.00103	0.54909	3.90844	0.64798	3.83636	0.61815
345	adult	3.54706	0.63891	4.02907	0.68624	3.87587	0.86119	3.60739	0.52179	4.02009	0.57578	3.9469	0.6848	4.03479	0.60639
345	adult	3.67206	0.69189	3.67524	0.62867	3.87642	0.94766	3.81641	0.56634	3.8504	0.57545	3.66656	0.59639	3.74702	0.55087
345	adult	3.35788	0.63655	4.11517	0.67261	3.59984	0.73243	3.67988	0.49668	3.77032	0.50997	3.7803	0.54928	3.79877	0.51908
345	adult	3.89434	0.63437	3.81568	0.59907	3.73127	0.87546	3.91426	0.52975	4.07885	0.59573	4.03366	0.66901	3.97196	0.58618
345	adult	3.65524	0.66956	3.82369	0.61724	3.80072	0.67582	3.64203	0.4918	4.13715	0.5565	3.75492	0.53009	3.68509	0.5556
345	adult	3.75301	0.65455	4.06424	0.61311	3.62761	0.77921	3.93952	0.54635	3.79465	0.49921	3.7494	0.53442	3.84856	0.5759
345	adult	3.58466	0.64224	3.7984	0.54353	3.59457	0.683	3.71049	0.52551	3.76557	0.51372	3.64019	0.58555	3.76171	0.50952
345	adult	0.30773	0.56292	0.59208	0.59499	0.21476	0.4392	0.21211	0.52493	0.19695	0.46477	0.2098	0.42229	0.18873	0.49946
345	adult	3.88759	0.76955	3.96095	0.76579	3.72541	0.97461	3.86074	0.71511	4.10988	0.59361	3.9438	0.75704	3.96512	0.56945
345	adult	0.23542	0.41508	0.2709	3.76886	3.76879	0.57228	0.23156	0.4069	0.20037	0.47629	0.46115	3.51577	0.18838	3.90876
345	adult	3.75173	0.70451	3.92448	0.66144	3.83287	0.81297	3.95035	0.58629	3.89381	0.57169	3.97061	0.63597	4.03005	0.54294
345	adult	0.24491	0.44548	0.2613	3.97053	3.65378	0.63746	0.20504	0.49049	0.20019	0.47307	0.50916	3.59212	0.23066	3.93657
345	adult	0.21977	0.44191	0.24583	3.77598	3.84177	0.62902	0.21535	0.50346	0.19342	0.48906	0.46135	3.89222	0.18767	3.87449
345	adult	0.17095	3.75426	0.26279	3.84756	0.17172	3.79528	0.37299	3.99226	0.38294	3.95731	0.46957	3.60881	0.20573	3.87194
345	adult	0.17031	3.68987	0.37907	3.62473	0.16584	3.85108	0.39092	3.9208	0.44255	3.98299	0.4864	3.8349	0.22406	3.71659
345	adult	0.25625	3.85077	0.44152	3.82857	0.20726	4.03629	0.67419	3.59007	0.4955	3.7376	0.76909	3.60205	0.26424	3.7826
345	adult	0.16322	3.88852	0.24659	4.06398	0.15796	3.82472	0.31801	3.91472	0.32148	4.03638	0.36142	3.7952	0.18298	3.94944
345	adult	0.1654	4.05668	0.23571	3.62215	0.15789	3.86153	0.28104	3.81192	0.31244	3.88286	0.38303	3.80305	0.22963	3.66369
345	adult	0.16102	3.89466	0.20556	4.01146	0.14331	3.6803	0.26443	3.94772	0.33103	3.86422	0.35278	3.84877	0.1935	3.80097
345	adult	0.18351	4.06267	0.23065	3.83057	0.17191	3.88303	0.42065	3.81204	0.31212	3.68919	0.38096	3.7121	0.20064	3.61837
345	adult	0.16931	3.6903	0.25019	4.04286	0.15363	3.87899	0.30749	3.91296	0.33009	4.01418	0.40029	3.91084	0.18817	3.90715
345	adult	0.19366	3.79357	0.25395	3.88004	0.1701	4.06089	0.33202	3.891	0.33935	3.89366	0.38712	3.70024	0.19486	3.97922
345	adult	0.1687	3.88675	0.26618	3.86424	0.16085	3.90753	0.39057	3.95886	0.32281	3.8133	0.42978	3.7537	0.1948	3.9297
345	adult	0.19574	4.03288	0.37103	3.79555	0.16607	3.94406	0.35432	3.8736	0.3395	4.05638	0.41623	3.67548	0.21327	3.94455
345	adult	0.17755	3.7734	0.24848	3.76844	0.17482	3.85136	0.30482	3.71726	0.31983	3.72195	0.38711	3.67341	0.20525	3.65633
345	adult	0.17276	4.06488	0.24694	3.72021	0.16578	3.82293	0.3512	4.09599	0.34351	4.08149	0.46469	3.70888	0.20502	4.05962
345	adult	0.16536	3.76644	0.24634	3.89974	0.17502	3.8866	0.31587	3.93065	0.34058	3.73679	0.49729	3.79667	0.21713	3.82728
345	adult	0.17036	3.90371	0.21115	3.94121	0.17187	3.84486	0.23988	4.07541	0.31607	3.68956	0.29276	3.6645	0.18032	3.88343
345	adult	0.16401	3.90563	0.19691	3.84007	0.14969	3.61726	0.24681	3.67506	0.31693	3.82258	0.30544	3.93406	0.17735	3.69447
345	adult	0.17198	3.7304	0.26613	3.71686	0.16186	3.81047	0.33072	3.8812	0.32888	3.82188	0.40218	3.67255	0.21852	3.59957
345	adult	0.25178	0.45453	0.22973	3.80928	3.62632	0.56698	0.21135	0.41101	0.21892	0.45775	0.35878	3.71348	0.93582	2.44135
345	adult	0.18028	4.19234	0.23305	3.90337	0.16564	3.79682	0.317	3.83267	0.34061	3.92859	0.33012	3.78924	0.19684	3.63348
345	adult	0.17226	4.0269	0.21907	4.10452	0.16256	3.94113	0.25594	4.25585	0.38161	4.41967	0.30965	3.8174	0.21372	3.67767
345	adult	0.1645	3.98482	0.19556	3.95735	0.16701	3.97729	0.44817	3.82473	0.35237	3.93221	0.36436	3.78238	0.21511	3.95833
345	adult	0.19852	3.8231	0.41984	3.80375	0.18281	3.79196	0.50455	3.67756	0.5156	3.78594	0.68171	3.71498	0.23819	3.87143
345	adult	0.17677	3.93239	0.24617	3.807	0.15526	3.77362	0.31613	3.83553	0.32642	3.81924	0.42476	3.73229	0.19281	3.87981
345	larve	0.19261	3.71503	0.30339	3.63822	0.17939	3.69929	0.44718	3.89559	0.4905	3.70297	0.57569	3.52131	0.22795	3.81933
345	larve	3.85064	0.79953	3.95692	0.72612	3.68647	0.96542	3.81286	0.57302	4.11671	0.62628	3.92218	0.69415	3.79162	0.72478
345	larve	3.74588	0.8002	3.94105	0.70723	3.57265	0.9942	3.88674	0.72887	4.06319	0.6896	3.8563	0.74553	3.94081	0.60753
345	larve	3.7673	0.78529	4.00888	0.73386	3.63873	1.05109	3.96581	0.84729	4.06874	0.70407	3.9826	0.79037	3.95055	0.60614
345	adult	3.60365	0.58404	3.985	0.6445	3.86944	0.8126	3.98328	0.51581	4.0972	0.62234	3.97707	0.6257	3.86481	0.5306
345	larve	3.7867	0.7082	3.92417	0.67676	3.75914	0.84129	4.09355	0.61399	4.12967	0.60754	3.9933	0.63414	4.02848	0.51176
345	larve	3.86628	0.70342	3.90641	0.6665	3.99499	0.78902	3.64377	0.79721	4.13621	0.60885	3.89271	0.58732	3.87218	0.49188
345	larve	3.8998	0.68126	3.84586	0.61985	3.83872	0.78672	3.8417	0.5111	3.99386	0.57054	3.84012	0.57747	3.85401	0.49505
345	adult	3.85719	0.73618	4.00089	0.68904	3.83322	0.84281	4.01112	0.62475	4.23101	0.54055	4.02837	0.63127	3.94286	0.5505
345	adult	3.94509	0.70272	3.97606	0.60164	4.00751	0.84568	4.07103	0.56665	4.06509	0.52419	4.01599	0.60218	4.16391	0.56059
345	adult	0.29049	0.49888	0.24314	0.43621	0.22885	0.46529	0.20243	0.48854	0.20958	0.48286	0.22451	0.42993	0.19791	0.40607
345	adult	3.8553	0.62001	3.98907	0.6558	3.91424	0.7819	3.95231	0.54365	3.98791	0.5397	3.9857	0.6465	4.02761	0.52646
345	adult	3.39853	0.58176	3.7017	0.52245	3.69552	0.73421	3.78996	0.53519	3.95695	0.48089	0.21084	0.432	3.26585	0.48363
345	adult	0.2126	0.44023	4.06928	0.63857	0.20637	0.42628	0.2135	0.4892	0.17991	0.39537	0.19596	0.39672	3.1465	0.50086
345	adult	3.89548	0.84827	4.01545	0.68388	3.83544	0.87378	4.14645	0.61201	3.91403	0.54565	3.86183	0.67012	3.95586	0.5522
345	adult	3.69152	0.81789	4.01809	0.69032	3.68083	0.98616	4.05393	0.58386	4.04397	0.55634	3.86559	0.62275	3.85562	0.53524
345	adult	3.88624	0.56941	4.06632	0.61459	3.79382	0.69757	3.66834	0.61252	4.06768	0.59325	4.1754	0.65398	3.81479	0.51848
345	adult	3.37473	0.5846	4.19066	0.59791	4.01436	0.617	3.62937	0.53041	4.15038	0.52847	3.78095	0.55677	3.95323	0.50038
345	adult	3.50966	0.62047	4.06865	0.5725	3.0611	1.30367	3.37605	0.53045	4.18036	0.556	3.78422	0.53294	3.7888	0.51937
345	adult	3.61276	0.57294	3.91119	0.59206	3.80806	0.82697	3.96542	0.53238	3.94841	0.52833	4.00224	0.60364	3.92999	0.50137
345	adult	3.85184	0.60126	3.9684	0.59456	3.64382	0.7802	3.72322	0.49748	3.85331	0.57387	3.96117	0.62299	3.90176	0.47205
345	adult	3.58851	0.64321	3.8809	0.62615	3.84588	0.7835	3.83734	0.60423	3.97547	0.54701	3.23991	1.12678	3.9073	0.52501
345	adult	0.23322	3.79244	0.32576	3.75123	0.19342	3.89261	0.50065	3.84665	0.42914	3.83192	0.6661	3.6469	0.25428	3.81981
345	adult	0.27159	0.46291	0.22313	0.42004	0.22127	0.46066	0.21748	0.45513	0.20611	0.43759	0.22839	0.42114	0.2172	0.44393
345	adult	1.35828	2.99146	3.06761	1.83087	0.70182	3.40746	2.16202	2.57005	2.77302	2.08723	2.36003	2.12805	2.67045	1.7344
345	adult	0.73301	2.89286	1.28577	0.60629	0.29223	0.46096	1.69422	1.90644	3.78591	0.52357	0.29726	2.54421	0.70637	2.8863
345	adult	0.47831	3.41427	2.12215	2.31623	1.71765	2.60539	0.20837	3.84437	2.56321	1.80736	0.56093	3.26564	0.17125	4.03153
345	adult	2.65614	1.36323	1.97197	3.0396	1.00244	2.90301	1.81666	2.4385	0.33108	3.87361	1.88259	2.23761	3.54664	0.65868
345	adult	2.61693	2.51041	2.85345	2.34413	2.6559	2.4334	2.66468	2.69318	2.96607	2.18198	2.383	2.4239	2.31306	2.4087
345	adult	3.32119	0.69002	0.16489	3.21247	2.51075	1.73252	3.02744	0.51189	3.19132	1.26463	0.22365	0.46819	3.52373	0.58582
345	adult	2.04946	2.47046	1.94882	3.0596	2.54528	2.05759	1.00638	3.27002	2.55079	2.2353	2.91646	1.33371	1.94287	2.38304
345	adult	2.89027	1.15407	2.0273	2.16499	2.88553	0.56587	2.0628	2.21825	4.08331	0.56303	3.2242	0.56109	1.8361	1.82587
345	adult	2.07389	2.13086	2.40694	2.57211	1.45504	2.67359	1.70808	2.6971	2.28788	2.58226	1.50333	2.62727	0.15969	3.47577
345	adult	3.21624	0.61187	3.84241	0.64923	0.21546	0.49383	3.48052	0.54027	3.5123	0.51634	0.22367	0.46001	3.78383	0.57334
345	adult	0.15702	3.64022	0.18431	3.6739	0.18038	3.73375	0.24626	3.62231	0.36363	3.70808	0.34439	3.66041	0.17795	3.74907
345	adult	1.86891	2.39723	0.16674	3.76069	0.24826	0.4655	3.01065	0.47922	3.58893	0.95641	1.33973	2.4007	1.42613	2.50853
345	adult	0.17454	3.90306	0.15865	3.60974	0.16583	3.78699	0.22527	3.65727	0.34367	3.69107	0.41472	3.58396	0.18622	3.76337
345	adult	0.1808	3.9668	0.19493	3.74294	0.1755	3.89237	0.21148	3.82693	0.27258	3.73789	0.33691	3.85621	0.16914	3.9775
345	adult	0.18529	3.67897	0.20743	4.04118	0.17135	3.88996	0.22932	3.86006	0.3267	3.79793	0.28276	3.44308	0.17557	3.8305
345	adult	0.17649	3.81385	0.24402	3.76142	0.16243	3.74554	0.31086	3.60022	0.28454	3.72057	0.43516	3.69334	0.19751	4.10803
345	adult	0.15535	3.53824	3.45859	0.52234	2.98582	0.58274	0.24583	0.4604	3.33255	0.50817	0.23315	0.49593	3.29804	0.53122
345	adult	3.69705	0.67914	4.02097	0.53634	3.58741	0.77955	3.41118	0.52127	3.97381	0.54514	3.57183	0.51857	3.54239	0.49872
345	adult	3.72334	0.73775	3.93756	0.65606	3.67697	0.90718	3.86109	0.57306	4.03193	0.57142	3.72151	0.54573	3.72886	0.52323
345	adult	3.627	0.63179	3.83239	0.63367	3.65788	0.70302	3.64474	0.49448	3.92094	0.53314	3.47069	0.51047	3.73908	0.54076
345	adult	3.71414	0.73059	3.96227	0.69425	3.72248	0.92109	3.79345	0.57469	4.09313	0.55824	3.79209	0.58363	3.78231	0.5437
345	adult	3.29506	0.58712	3.68146	0.56668	3.20093	0.66254	3.48604	0.47916	3.97656	0.52152	3.82529	0.58986	2.71727	1.04062
345	adult	3.62527	0.7693	3.98781	0.81217	3.60169	1.11365	3.81319	0.6704	3.94151	0.62035	3.58114	0.76145	3.74654	0.65941
345	adult	0.19931	3.81747	0.37188	3.92165	0.20011	3.82157	0.393	3.75791	0.34986	3.90443	0.50194	3.78346	0.22175	4.3218
345	adult	0.38019	0.44325	0.29755	0.48841	2.01428	1.98764	0.21653	1.12104	3.45092	1.19022	3.42394	0.52043	1.6469	1.99446
345	adult	3.57315	0.73691	3.34914	1.55734	3.62836	0.90907	3.89053	0.56514	3.94937	0.54675	3.69187	0.71402	3.58497	0.56006
345	adult	3.42994	0.64543	3.96154	0.66931	3.77949	0.73324	3.43481	0.44477	3.8823	0.5259	3.83219	0.61921	3.77198	0.55588
345	adult	3.18522	0.57547	1.90405	2.65669	3.08099	0.88175	0.22948	0.45654	0.22189	0.43667	2.9669	0.56716	2.84376	0.4818
345	adult	2.79388	0.52587	3.9505	0.60026	3.78952	0.70726	2.75657	0.66966	3.9007	0.50173	3.51631	0.49637	3.39968	0.4916
345	adult	0.16249	3.22382	3.46763	0.52105	0.17338	3.59693	0.48471	0.48899	3.15275	0.51135	0.6275	2.50111	1.80322	1.86093
345	adult	2.63719	0.51276	3.473	0.52295	3.77825	0.68736	2.70357	0.45704	3.53431	0.54425	3.44144	0.50019	3.49283	0.54469
345	adult	3.87777	0.73429	4.04577	0.65649	3.71118	0.85561	3.95832	0.54278	3.98136	0.54414	3.93613	0.61364	3.79652	0.52461
345	adult	0.1606	3.72922	0.21031	3.93912	0.17562	3.79867	0.23745	3.65165	0.35263	4.09947	0.41864	3.81571	0.17053	3.74239
345	adult	3.43496	0.57051	4.01254	0.62913	3.6677	0.733	3.49698	0.57528	3.79491	0.55768	1.63392	0.46888	3.7964	0.64655
345	adult	1.80405	2.74792	3.95669	0.71794	3.50591	0.83638	3.68348	0.59409	3.88412	0.54079	3.72346	0.6047	3.55057	0.54129
345	adult	1.42714	0.49929	1.70244	0.54266	3.27954	0.60034	3.07129	0.49996	3.9002	0.53243	3.64502	0.56824	3.45217	0.51533
345	adult	3.546	0.59232	3.63262	0.63818	0.33733	0.48066	2.99445	0.52437	3.85883	0.55162	3.15855	0.56685	3.49711	0.55274
345	adult	3.3102	0.60683	4.10908	0.58994	3.38074	0.75454	3.66126	0.49469	3.91878	0.54813	2.88127	1.09965	3.35144	0.53114
345	adult	3.12714	0.52842	4.12765	0.62524	3.43897	0.72856	3.5442	0.50898	4.26909	0.53553	2.03183	0.49581	3.80841	0.59842
345	adult	0.19891	3.72612	0.19757	3.64557	0.18538	3.84615	0.26132	3.61762	0.36502	3.65572	0.88312	3.07835	0.20325	3.84097
345	adult	0.24329	0.47727	3.57547	0.58038	3.66779	0.87839	2.937	0.48792	0.22263	0.47357	0.22182	0.46403	2.84387	0.53308
345	adult	0.20399	3.86905	0.1793	3.74044	0.17471	3.82592	0.32464	3.74243	0.22668	3.67344	0.45227	3.45834	0.18734	3.72228
345	adult	0.23118	3.91065	0.26321	4.13702	0.17718	3.81432	0.28788	3.76155	0.31736	3.96642	0.48004	3.54937	0.19719	3.83104
345	adult	0.16828	3.65526	0.21671	3.9264	0.1712	3.64443	0.44441	3.74359	0.25094	3.41161	0.55451	3.31817	0.23449	3.8025
345	adult	2.63705	2.33188	2.64886	2.39863	2.46094	2.33694	2.28251	2.74414	2.84942	1.94609	2.32056	2.38528	2.20962	2.43557
345	adult	3.70354	0.67654	3.99159	0.70177	3.56914	1.12829	4.12367	0.63601	3.83044	0.5872	3.74748	0.60108	3.63804	0.53989
345	adult	1.30722	2.87228	0.21898	3.56591	2.42834	2.21918	0.24916	3.88281	3.31705	1.66614	1.30876	2.67571	3.79686	0.57889
345	adult	3.23112	0.55098	0.23387	0.43166	1.45131	2.45284	2.35466	0.4327	0.23158	0.49512	2.69302	0.4926	0.21571	0.51601
345	adult	2.59426	0.58473	3.65402	0.71271	3.13225	0.65287	3.67845	0.57662	2.87333	0.43781	2.86924	0.54453	2.72703	0.52447
345	adult	3.94565	0.72819	3.92193	0.60931	3.77079	0.84273	3.76567	0.57547	4.04634	0.57902	3.83914	0.85541	3.97533	0.51648
345	adult	3.74202	0.6728	4.04182	0.57257	3.42096	1.15659	2.75601	1.22924	3.71842	1.29937	3.17277	1.18645	3.6984	0.53538
345	adult	2.3889	1.68037	1.12735	3.24754	3.35748	1.13602	2.16605	2.54235	3.83444	0.76494	1.75387	2.35926	1.70179	2.01902
345	adult	3.7852	0.76294	3.85667	0.61842	3.79636	0.87017	3.90279	0.54794	4.12378	0.56128	3.77888	0.60967	3.69478	0.51731
345	adult	0.17591	3.52112	0.25268	3.79858	0.15763	3.62281	0.29263	3.60201	0.32495	3.89254	0.42367	3.46045	0.18772	3.57811
345	adult	1.08616	3.1113	1.37058	3.34363	3.52703	1.08337	2.26513	1.61841	3.31286	1.44003	2.50086	0.7766	2.34185	1.62846
345	adult	3.188	0.54578	0.17908	4.01531	3.36997	0.62032	0.84878	2.85495	3.37523	1.19381	1.00085	2.48636	0.17151	3.84685
345	adult	1.23138	2.71866	3.49282	1.08038	3.55648	0.67032	1.54569	2.33611	3.65914	0.94663	0.26324	2.28731	2.32705	1.81538
345	adult	2.58486	1.37253	0.19251	3.68367	0.18902	3.05014	0.22824	3.36026	2.88834	1.11851	2.6828	0.52549	1.46252	2.27583
345	adult	2.18488	2.45976	2.12228	2.85106	1.56813	2.96687	1.49952	3.26632	2.89894	2.06608	3.35816	1.1446	2.01608	2.43241
345	adult	0.79669	3.30406	2.7075	2.08387	2.30051	2.01436	0.86305	3.11121	2.33665	2.29935	2.1156	1.5888	2.11052	1.8735
345	adult	3.40673	0.58782	3.6836	0.61364	3.58591	0.72278	3.61589	0.56686	3.84982	0.50061	3.47975	0.53978	3.71708	0.46895
345	adult	0.16706	3.61129	2.03343	2.61578	2.96594	1.47683	1.89241	2.4262	3.18699	1.58463	2.2956	1.75388	1.29434	2.87141
345	adult	0.33693	0.41887	3.625	0.49695	3.4598	0.6298	3.38827	0.50237	3.77747	0.6123	2.78589	0.47908	2.49953	0.35912
345	adult	2.5455	1.89349	3.86489	0.6187	2.21313	2.55656	2.00757	2.3368	2.9987	1.87087	1.98666	2.31252	2.096	2.5003
345	adult	2.18241	1.88057	1.67837	2.42181	2.12346	2.11129	2.42171	2.09907	2.91424	1.76288	2.00923	1.91322	1.8889	1.87626
345	adult	0.21047	0.46649	0.19164	3.00386	0.24516	0.48229	0.23206	0.46842	0.22683	0.45087	0.2895	2.75026	0.17447	3.61716
345	adult	2.2587	2.29207	2.8542	2.36927	2.4496	2.38535	2.29899	2.79563	2.87494	2.16746	2.41181	2.50521	2.18678	2.49368
345	adult	2.65484	2.59261	2.81675	2.44966	2.65484	2.43513	2.62013	2.53338	2.89236	2.0959	2.49019	2.55087	2.34465	2.47469
345	adult	3.5557	0.72737	0.80907	3.07305	0.17278	3.67877	1.63577	1.94529	3.00167	1.67759	1.94227	0.49956	2.64055	0.57142
345	adult	1.81245	2.62346	2.57874	2.36805	2.69822	2.13082	2.22331	2.47026	3.20937	1.46973	2.28459	2.12891	2.14236	2.13767
345	adult	2.32342	2.21324	2.20904	2.62332	2.11841	2.66789	2.34764	2.37124	3.20183	1.74601	2.16823	2.3826	2.44084	1.92091
345	adult	3.54831	0.63576	0.21352	3.79285	3.03497	1.25353	0.22953	3.64132	2.61867	1.92611	0.87132	3.09639	1.1563	2.84606
345	adult	1.67772	2.53691	2.2058	2.60461	2.81779	1.64669	1.41067	2.59896	3.0281	1.85926	2.4693	1.66326	0.71502	3.07808
345	adult	3.64194	0.64527	3.93209	0.73595	3.66063	0.86773	3.81711	0.5184	3.88458	0.51988	3.7804	0.5992	3.83716	0.55408
345	adult	3.59047	0.83935	3.90392	0.80681	3.5559	1.13316	3.81882	0.6245	3.95587	0.58646	3.8658	0.67037	3.57719	0.90793
345	adult	0.24648	0.4949	0.21942	0.42376	0.23377	0.47205	0.23795	0.4637	0.2341	0.50363	0.22389	0.4623	0.23601	0.52577
345	adult	0.22482	3.93376	0.26783	3.70697	0.17361	3.62649	0.44145	3.75399	0.30535	3.75884	0.6324	3.41866	0.21438	3.89584
345	adult	0.20154	3.77236	0.25607	3.7488	0.17034	3.80292	0.31334	3.72778	0.33539	4.0156	0.51142	3.52804	0.2157	3.8295
345	adult	0.18805	3.82409	0.19265	3.77065	0.16694	3.72224	0.27675	3.76324	0.32208	3.67546	0.49778	3.47085	0.20464	3.8019
345	adult	0.22281	3.79597	0.26399	3.8037	0.18856	3.96437	0.26356	3.61151	0.35527	3.80341	0.47745	3.57459	0.18707	3.65437
345	adult	0.19283	3.78454	0.26266	3.69592	0.18056	3.88507	0.32451	3.71045	0.36248	3.77694	0.43689	3.61724	0.19631	3.86492
345	adult	0.17565	3.67583	0.23717	3.80359	0.16572	3.83352	0.29114	3.74273	0.34861	4.08187	0.4054	3.64316	0.18606	4.0894
345	adult	3.61003	0.69411	3.92173	0.70179	3.68455	0.83491	3.63286	0.5458	3.95659	0.5592	3.86367	0.62641	3.79642	0.55587
345	adult	0.16805	3.64541	0.21759	3.82388	0.17952	3.89331	0.22975	3.73615	0.31274	3.62192	0.40311	3.55084	0.19007	3.81813
345	adult	0.18016	3.83967	0.21754	3.80876	0.18564	3.65612	0.24307	3.76371	0.35842	3.88487	0.34118	3.55168	0.16315	3.51261
345	adult	0.16187	3.77667	0.21063	4.07305	0.16324	3.60374	0.38439	3.64412	0.35085	3.70314	0.33831	3.56026	0.19182	4.03092
345	adult	0.18954	3.87679	0.31024	3.96942	0.19959	3.64325	0.39356	3.68235	0.44643	3.68223	0.60564	3.53485	0.22316	3.76028
345	adult	0.19115	3.78791	0.41616	3.64201	0.1986	3.96123	0.43041	3.47659	0.43848	3.67608	0.51183	3.38673	0.23364	3.88597
345	adult	0.21144	3.84767	0.33585	3.75159	0.20932	3.97987	0.55999	3.65999	0.45605	3.77563	0.73513	3.46523	0.23488	3.81206
345	adult	0.18463	3.81463	0.32339	3.84373	0.1779	3.78745	0.4485	3.66987	0.40678	3.65825	0.64954	3.5125	0.52061	3.62331
345	adult	0.15863	3.53366	0.28664	3.79542	0.17934	3.76276	0.39688	3.74061	0.38704	3.62421	0.70957	3.40106	0.21783	3.79294
345	adult	0.19426	3.87065	0.27619	3.63632	0.19219	3.8754	0.34976	3.76219	0.31964	3.85809	0.44096	3.56973	0.20488	3.80227
345	adult	0.23057	3.75994	0.28049	3.85933	0.20939	3.76185	0.41495	3.59635	0.43111	3.52865	0.65639	3.58876	0.22558	3.79361
345	adult	0.20191	4.05047	0.23487	3.75688	0.17052	3.65473	0.28519	3.81029	0.35965	3.69721	0.44863	3.55326	0.21107	3.89752
345	adult	0.19892	3.72356	0.21788	3.85708	0.17398	3.8773	0.31609	3.65924	0.3452	3.76263	0.48595	3.64475	0.21313	3.80874
345	adult	0.18647	3.97141	0.23651	3.69982	0.20219	3.88755	0.30806	3.63844	0.33662	3.56282	0.48628	3.55033	0.20199	3.71109
345	adult	0.1864	3.9915	0.2193	3.90552	0.16517	3.79628	0.85996	3.344	0.30525	3.42375	0.39689	3.57727	0.17858	3.91533
345	adult	0.18063	3.90035	0.25889	3.88077	0.16748	3.84238	0.30484	3.79886	0.43527	3.72885	0.47562	3.67033	0.20263	3.84986
345	adult	3.68151	0.62887	3.90568	0.65581	3.77272	0.82901	3.69603	0.52377	3.90551	0.52704	3.59743	0.51776	3.66981	0.5065
345	adult	2.21864	0.4934	0.23188	0.44789	2.91158	0.50232	0.22853	0.59139	3.93321	0.5147	2.06576	0.48237	0.26522	0.51594
345	adult	3.84005	0.67651	4.00315	0.72785	3.94618	0.82052	3.92349	0.55518	3.93052	0.55645	3.93996	0.58533	3.96338	0.54279
345	adult	0.20433	3.9339	0.28804	4.33031	0.18604	3.7099	0.32877	3.81548	0.29502	3.75788	0.43156	3.69329	0.19046	3.79661
345	adult	3.91881	0.70066	3.85769	0.60393	3.74112	0.8206	4.05412	0.53354	3.85056	0.55378	3.86629	0.582	3.59526	0.52168
345	adult	3.95723	0.63163	3.9113	0.59402	3.86267	0.86242	3.95523	0.54286	4.05242	0.5138	3.90822	0.55862	3.90487	0.5468
345	adult	3.8605	0.6145	4.05117	0.56688	3.9361	0.84638	4.12155	0.54115	4.10879	0.60856	4.03103	0.59762	3.96805	0.49794
345	adult	3.8896	0.62156	4.06118	0.60897	3.83385	0.83606	4.07075	0.54363	4.08291	0.55521	3.8712	0.60032	3.81592	0.52227
345	adult	3.95471	0.62537	3.80685	0.56653	3.84845	0.7877	3.9752	0.49725	3.91204	0.5178	3.88939	0.5321	3.88713	0.50583
345	adult	3.89812	0.69009	3.92434	0.64301	3.92026	0.83676	3.81513	0.82549	4.00175	0.51993	3.93621	0.58069	3.94256	0.52145
[truncated: 2,981 more rows]
